# Supplementary material for: National age-specific food baskets for a healthy, sustainable, affordable, and inclusive global dietary transition
Source: Research Square preprint supplement (doi:10.21203/rs.3.rs-5605171/v1), 2025-02-03
Supplement: Supplementary file 1 [file 725ac465cb9b94a9ada0b601.xlsx]

## Sheet: Table S1
		Table S1. Nutritional, environmental, and acceptability constraints applied in nonlinear optimization
		Constraint type	0-5	6-10	11-19	20-44	45-59	60+
		Nutritional constraints
		energy (kcal cap-1 day-1)	≥1180	≥1640	≥2264	≥2360	≥2151	≥2016
		sugar (g cap-1 day-1)	≤30	≤41	≤57	≤59	≤54	≤50
		sat-fats (g cap-1 day-1)	≤13	≤18	≤25	≤26	≤23	≤22
		total fats (g cap-1 day-1)	26.2-45.9	36.5-63.8	50.3-88.0	52.5-91.8	47.8-83.7	44.8-78.4
		protein (g cap-1 day-1)	≥14	≥25	≥44	≥51	≥51	≥51
		fiber (g cap-1 day-1)	≥20	≥26	≥31	≥32	≥28	≥25
		Vitamin C (mg cap-1 day-1)	≥23	≥33	≥41	≥45	≥45	≥45
		calcium (mg cap-1 day-1)	≥499	≥660	≥695	≥651	≥677	≥700
		iron (mg cap-1 day-1)	≥7.7	≥9.2	≥11.3	≥12.9	≥10.3	≥8.0
		magnesium (mg cap-1 day-1)	≥60	≥90	≥227	≥240	≥240	≥217
		thiamin (mg cap-1 day-1)	≥0.5	≥0.7	≥1.0	≥1.2	≥1.2	≥1.1
		riboflavin (mg cap-1 day-1)	≥0.5	≥0.7	≥1.1	≥1.2	≥1.2	≥1.2
		folate (μg cap-1 day-1)	≥153	≥240	≥367	≥400	≥400	≥400
		zinc (mg cap-1 day-1)	≥3.6	≥6.2	≥7.7	≥6.0	≥5.9	≥5.9
		phosphorus (mg cap-1 day-1)	≥426	≥798	≥1188	≥700	≥700	≥700
		copper (mg cap-1 day-1)	≥0.4	≥0.5	≥0.8	≥0.9	≥0.9	≥0.9
		Vitamin B6 (mg cap-1 day-1)	≥0.5	≥0.8	≥1.2	≥1.3	≥1.5	≥1.6
		Vitamin A (RAE cap-1 day-1)	≥358	≥480	≥595	≥551	≥550	≥581
		PUFA (g cap-1 day-1)	6.6-13.1	9.1-18.2	12.6-25.2	13.1-26.2	12.0-23.9	11.2-22.4
		niacin (mg cap-1 day-1)	≥6	≥10	≥14	≥15	≥15	≥15
		Carbohydrates (g cap-1 day-1)	≥120	≥130	≥130	≥130	≥130	≥130
		potassium (mg cap-1 day-1)	≥1862	≥2341	≥2615	≥3007	≥2998	≥2963
		Monounsaturated fats (g cap-1 day-1)	≤26	≤36	≤50	≤52	≤48	≤45
		Environmental constraints
		GHG emissions	≤ 1866 g cap-1 day-1
		blue water use	≤ 786 L cap-1 day-1
		agricultural land use	≤ 5.01 m2 cap-1 day-1
		nitrogen use	≤ 27.4 gN cap-1 day-1
		phosphorus use	≤ 6.35 gP cap-1 day-1
		Acceptability constraints
		total weight	80-150% of total weight of current diet
		individual foods	>0.1 times and <95th percentile of current diet
		alcohol, spices, stimulants	= current levels
		beef, pork	≤ current levels (Islamic countries and countries such as India)
		items with zero intake	≤ 10 g in the optimized diet

## Sheet: Table S2
		Table S2 The mean nutrition deficiencies in current diet
		ISO3	Region Code	Age groups	Essential nutrients																	Energy	Nutrients of health concern
					Calcium	Copper	PUFA	Fiber	Folate	Iron	Magnesium	Niacin	Phosphorus	Potassium	Protein	Riboflavin	Thiamin	VitaminA	VitaminB6	VitaminC	Zinc	Calories	Carbohydrates	MonounsatFA	SAFAT	Total Fats	Sugar			Note: Essential nutrients and energy levels range from 0 to 1. A lower value indicates a greater deficiency in nutrient intake, while a value of 1 signifies that the intake has reached the recommended minimum. In contrast, the range for Nutrients of Health Concern is greater than 0. A value of 0 indicates that the intake does not exceed the maximum recommended level, while values greater than 0 s…
		AGO	4	Age0-5	0.409424	1	1	0.913698	1	0.936914	1	1	1	1	1	1	1	1	1	1	1	1	1	0	0	0	0
		ALB	1	Age0-5	1	1	1	0.444323	0.674118	0.651527	1	0.724067	1	0.613399	1	1	0.896575	1	1	1	1	1	1	0	0.743722	0.253167	0.513326
		ARE	5	Age0-5	0.239864	1	1	0.635329	0.799573	0.739862	1	1	1	0.464068	1	0.697476	1	0.423514	1	0.894957	1	1	1	0	0	0.390798	0.256103
		ARG	7	Age0-5	1	1	1	0.361757	0.612931	0.908616	1	1	1	0.863749	1	1	1	0.952106	1	1	1	1	1	0	0.971753	0.602653	0.956987
		ARM	1	Age0-5	1	1	1	0.585896	0.624394	0.664078	1	0.979359	1	0.55537	1	1	1	0.82553	1	1	1	0.870896	0.986126	0	0.422884	0.135656	0.245915
		ATG	7	Age0-5	0.527656	1	1	0.466443	0.538595	0.635091	1	1	1	0.582355	1	0.887346	0.841531	0.450904	1	1	1	0.828933	1	0	0.0864434	0	0.28663
		AUS	2	Age0-5	1	1	1	0.383274	0.686578	0.666689	1	1	1	0.566366	1	1	0.853112	1	1	1	1	1	1	0.874183	3.18783	1.92057	0.490287
		AUT	1	Age0-5	1	1	1	0.600853	0.817651	0.713038	1	1	1	0.7249	1	1	1	1	1	1	1	1	1	1.26508	3.83958	2.48449	0.585065
		AZE	1	Age0-5	0.841966	1	0.916098	0.765793	0.615806	0.753004	1	1	1	0.57201	1	1	1	0.596166	1	1	1	0.7381	1	0	0	0	0
		BEL	1	Age0-5	1	1	1	0.47426	0.917135	0.722871	1	1	1	0.744069	1	1	1	1	1	1	1	1	1	1.29594	4.55645	2.77725	0.718538
		BEN	4	Age0-5	0.364855	1	1	0.914858	1	1	1	1	1	1	1	0.819731	1	1	1	1	1	1	1	0	0	0	0
		BFA	4	Age0-5	0.31062	1	1	0.966461	1	1	1	1	1	0.66718	1	0.99294	1	1	1	0.52559	1	1	1	0	0	0	0
		BGD	6	Age0-5	0.236896	1	0.880461	0.278848	0.318528	0.530059	1	0.920531	0.776702	0.256658	1	0.499692	0.975241	1	0.923833	1	0.526176	0.731328	1	0	0	0	0
		BGR	1	Age0-5	0.883162	1	1	0.262364	0.504527	0.415344	1	0.689327	1	0.34875	1	1	0.722766	0.560116	0.82107	0.953769	0.849301	1	1	0	0.454876	0.446042	0.119644
		BHS	7	Age0-5	0.275854	1	1	0.483267	0.645813	0.553677	1	0.960635	0.774345	0.609024	1	0.764104	0.874835	0.51994	1	1	0.781594	0.944281	1	0	0.286012	0.215427	0.817813
		BIH	1	Age0-5	0.913513	1	1	0.400943	0.734681	0.433647	1	0.776642	1	0.482549	1	0.856157	0.701155	0.925452	1	1	0.873401	0.867398	1	0	0.090978	0	0
		BLR	1	Age0-5	1	1	1	0.477294	0.686595	0.629001	1	0.913807	1	0.697044	1	1	0.97499	1	1	1	1	1	1	0.293272	1.23761	0.893009	0.314344
		BLZ	7	Age0-5	0.352582	1	1	0.660321	0.855459	0.831304	1	1	1	0.5806	1	0.868221	1	0.317498	1	1	1	1	1	0	0.307282	0.176845	0.756204
		BOL	7	Age0-5	0.453847	1	1	0.460508	0.770391	0.791117	1	1	1	0.717824	1	1	1	0.282692	1	1	1	0.893293	1	0	0	0	0.0576044
		BRA	7	Age0-5	1	1	1	0.563962	1	0.987174	1	1	1	0.9549	1	1	1	1	1	1	1	1	1	0	1.22348	0.780455	0.787938
		BRB	7	Age0-5	0.318087	1	1	0.501705	0.678365	0.705829	1	1	0.998897	0.58327	1	0.767969	0.987537	0.423049	1	1	0.950072	1	1	0	0.392505	0.539563	1.32368
		BRN	6	Age0-5	0.326659	1	1	0.402088	0.692281	0.688426	1	1	1	0.424683	1	1	1	1	1	1	0.948829	1	1	0	0.555445	0.189283	1.32148
		BWA	4	Age0-5	0.444561	1	1	0.474355	0.554894	1	1	0.872415	1	0.529528	1	1	1	0.477643	1	1	1	0.951176	1	0	0	0.0607933	0
		CAF	4	Age0-5	0.44233	1	1	0.71701	0.684466	1	1	0.816329	1	0.93448	1	0.830707	1	0.69186	1	1	1	0.972678	1	0	0	0.0927547	0
		CAN	2	Age0-5	1	1	1	0.490028	1	0.79068	1	0.970856	1	0.634775	1	1	1	1	1	1	1	1	1	0.960752	2.55856	1.87952	0.576683
		CHE	1	Age0-5	1	1	1	0.434343	0.775355	0.566283	1	0.859032	1	0.606223	1	1	0.93977	1	1	1	1	1	1	0.910572	3.56647	2.045	0.907957
		CHL	7	Age0-5	0.797985	1	1	0.460923	0.721067	0.934034	1	1	1	0.74298	1	1	1	0.576085	1	1	1	1	1	0	0.431419	0.160849	0.992565
		CHN	3	Age0-5	0.717185	1	1	0.791439	1	1	1	1	1	0.973305	1	1	1	1	1	1	1	1	1	0	0.338989	0.122518	0
		CIV	4	Age0-5	0.298993	1	1	1	0.937859	1	1	1	1	1	1	0.875925	1	1	1	1	1	1	1	0	0.768284	0.0840312	0
		CMR	4	Age0-5	0.335374	1	1	0.856175	1	1	1	1	1	0.974712	1	0.816443	1	1	1	1	1	1	1	0	0.0941222	0	0
		COG	4	Age0-5	0.294207	1	0.886803	0.44411	0.697155	0.682569	1	1	0.830616	0.62846	1	0.598313	0.87408	1	1	1	0.864098	0.897945	1	0	0.0743262	0	0
		COL	7	Age0-5	0.776237	1	1	0.452556	0.716107	0.844934	1	0.874237	1	0.910887	1	1	1	1	1	1	1	1	1	0	1.17151	0.463394	1.20652
		CPV	4	Age0-5	0.555239	1	1	0.556385	0.730092	0.951462	1	0.966493	1	0.70747	1	1	1	0.486185	1	1	1	1	1	0	0.154055	0.12959	0
		CRI	7	Age0-5	1	1	1	0.620273	0.856798	0.881211	1	1	1	0.851654	1	1	1	1	1	1	1	1	1	0.0246381	1.73535	0.806294	1.23435
		CYP	1	Age0-5	1	1	1	0.348913	0.570938	0.488483	1	0.775444	1	0.537189	1	1	0.895864	0.813522	1	1	1	1	0.890082	0.307985	0.920649	0.845678	0.022072
		CZE	1	Age0-5	1	1	1	0.306626	0.493666	0.554431	1	0.687212	1	0.413941	1	0.979286	0.770651	0.87666	0.94337	1	1	1	1	0.410829	1.04781	0.84773	0.609631
		DEU	1	Age0-5	1	1	1	0.441347	0.771843	0.608929	1	0.960068	1	0.633539	1	1	1	1	1	1	1	1	1	0.968385	3.77052	2.20291	0.638272
		DJI	4	Age0-5	0.251543	1	1	0.471097	0.774428	1	1	0.857462	0.990474	0.48607	1	0.748124	1	1	1	0.926664	1	1	1	0	0.358803	0.0501007	0
		DMA	7	Age0-5	0.82785	1	1	0.855465	0.872529	0.960624	1	1	1	1	1	1	1	0.65173	1	1	1	1	1	0	0.82385	0	0.803662
		DNK	1	Age0-5	1	1	1	0.620652	1	0.75737	1	1	1	0.843452	1	1	1	1	1	1	1	1	1	1.06809	5.16479	2.56466	0.794879
		DOM	7	Age0-5	0.444629	1	1	0.540439	0.926426	0.642296	1	0.833022	0.932452	0.744609	1	0.813735	0.877049	1	1	1	0.959455	1	1	0	1.31072	0.710537	0.260851
		DZA	5	Age0-5	0.620319	1	1	0.619559	0.792423	0.637035	1	0.922177	1	0.623411	1	0.882766	0.952992	0.718055	1	1	0.934394	1	1	0	0	0.224091	0.129233
		ECU	7	Age0-5	1	1	1	0.432132	0.600944	0.74381	1	0.89619	1	0.822122	1	1	1	1	1	1	1	1	1	0.10251	2.17018	0.945783	0
		EGY	5	Age0-5	0.682533	1	1	0.55129	0.819486	0.646657	1	1	1	0.62017	1	0.912783	0.995293	0.534526	1	1	0.856308	1	1	0	0	0	0.404416
		ESP	1	Age0-5	1	1	1	0.451703	0.775785	0.612258	1	0.985961	1	0.653359	1	1	1	1	1	1	1	1	0.939019	1.47335	1.75158	1.96743	0
		EST	1	Age0-5	1	1	1	0.432616	0.670311	0.511525	1	0.79261	1	0.574922	1	1	0.831305	1	1	1	1	1	1	0	1.18124	0.40069	0.487913
		ETH	4	Age0-5	0.463975	1	0.707535	0.671605	0.748284	1	1	0.918608	1	0.584646	1	0.946789	1	1	1	0.983595	1	0.886345	1	0	0	0	0
		FIN	1	Age0-5	1	1	1	0.548658	0.792575	0.600793	1	1	1	0.680904	1	1	1	1	1	1	1	1	1	0.467029	3.32801	1.46096	0.0383514
		FJI	2	Age0-5	0.447436	1	1	0.824626	0.770713	0.826986	1	1	1	0.662061	1	0.7254	1	0.843253	1	1	1	1	1	0	2.63951	0.922118	0.856825
		FRA	1	Age0-5	1	1	1	0.407011	0.852895	0.619135	1	1	1	0.721061	1	1	1	1	1	1	1	1	1	0.86535	4.02407	2.22481	0.270266
		GBR	1	Age0-5	1	1	1	0.477843	0.735514	0.629906	1	0.947796	1	0.639471	1	1	1	1	1	1	1	1	1	0.347105	1.61466	1.04605	0.310357
		GEO	1	Age0-5	0.743377	1	1	0.578867	0.456189	0.622127	1	0.965248	1	0.40383	1	0.826245	1	0.374348	1	0.737843	1	0.745422	0.978744	0	0	0	0.0388213
		GHA	4	Age0-5	0.403027	1	1	1	1	1	1	1	1	1	1	0.974721	1	1	1	1	1	1	1	0	0	0	0
		GIN	4	Age0-5	0.2949	1	1	0.480354	0.648001	0.827249	1	1	0.887069	0.596891	1	0.640244	0.812858	1	1	1	0.925588	1	1	0	0.35515	0.113984	0
		GMB	4	Age0-5	0.248152	1	1	0.558755	0.610358	1	1	1	1	0.44645	1	0.704229	1	1	1	0.485513	1	1	1	0	0.469582	0.342667	0
		GNB	4	Age0-5	0.255025	1	1	0.361994	0.524548	0.901768	1	0.881385	0.981713	0.462828	1	0.649816	0.906102	1	1	1	1	1	1	0	0.422274	0.181641	0
		GRC	1	Age0-5	1	1	1	0.543827	1	0.782851	1	1	1	1	1	1	1	1	1	1	1	1	1	1.42514	3.07676	2.24146	0
		GRD	7	Age0-5	0.221772	1	1	0.565634	0.719147	0.601495	1	0.814873	0.796431	0.491445	1	0.666862	0.711689	0.295975	1	1	0.783058	0.965941	1	0	0.939962	0.314523	0.634256
		GUY	7	Age0-5	0.478054	1	0.412715	0.52325	0.578858	0.674228	1	0.994293	1	0.597766	1	0.766085	0.877154	0.376465	1	1	1	0.944158	1	0	0.703533	0	0.695151
		HND	7	Age0-5	0.720978	1	1	0.75658	0.719125	0.897146	1	1	1	0.666488	1	1	1	1	1	1	1	1	1	0	1.27493	0.411833	0.785753
		HRV	1	Age0-5	1	1	1	0.303374	0.458799	0.473194	1	0.6215	1	0.406161	1	1	0.770203	1	0.908466	1	0.960457	1	1	0.0516378	0.93278	0.618182	0.988729
		HTI	7	Age0-5	0.229162	1	1	0.516693	0.905424	0.612736	1	0.668108	0.781328	0.661939	1	0.512149	0.872411	1	1	1	0.800553	0.812702	1	0	0	0	0
		HUN	1	Age0-5	0.83466	1	1	0.27545	0.432113	0.429413	1	0.573425	0.962989	0.373543	1	0.843253	0.678198	1	0.823232	1	0.84563	1	0.84994	0.600402	1.47865	1.27065	0.226983
		IDN	6	Age0-5	0.274628	1	1	0.503567	0.78013	0.78845	1	1	1	0.465638	1	0.749692	1	1	1	1	0.763213	1	1	0	0.908971	0.0612312	0
		IND	6	Age0-5	0.776544	1	1	0.32339	0.728921	1	1	1	1	0.516991	1	1	1	1	1	1	1	1	1	0	0.144834	0	0.305008
		IRL	1	Age0-5	1	1	1	0.57759	1	0.703917	1	1	1	0.955322	1	1	1	1	1	1	1	1	1	0.978325	5.35855	2.57248	0.543452
		IRN	6	Age0-5	0.578519	1	1	0.866257	0.877356	0.864662	1	1	1	0.776418	1	1	1	0.547236	1	1	1	1	1	0	0.106607	0.128227	0.200597
		IRQ	5	Age0-5	0.196325	1	1	0.649129	0.509899	0.636792	1	1	1	0.381631	1	0.616216	1	1	1	0.608323	0.962285	0.891025	1	0	0.172724	0.18147	0
		ISL	1	Age0-5	1	1	1	0.399819	0.65214	0.530076	1	1	1	0.616271	1	1	0.884663	1	1	1	1	1	1	0.164188	2.5367	1.16911	0.491672
		ISR	5	Age0-5	1	1	1	0.4804	0.810539	0.69997	1	1	1	0.566735	1	1	0.87091	1	1	1	1	1	1	0.507298	1.22066	1.34293	0.507664
		ITA	1	Age0-5	1	1	1	0.548789	0.926737	0.662328	1	1	1	0.734338	1	1	1	1	1	1	1	1	1	1.29941	2.71056	2.17081	0.0114718
		JAM	7	Age0-5	0.61206	1	1	0.51902	0.70124	0.596116	1	0.956331	1	0.807487	1	0.991377	1	1	1	1	0.832263	1	1	0	1.31066	0.336833	0.988356
		JOR	5	Age0-5	0.476044	1	1	0.702387	0.72653	0.773026	1	1	1	0.543473	1	1	1	1	1	1	1	1	1	0.0979212	0.608698	0.676593	0.681844
		JPN	3	Age0-5	0.824124	1	1	0.422392	0.868088	1	1	1	1	0.573485	1	1	0.896249	0.773189	1	1	1	1	1	0	0.606571	0.356356	0.848667
		KAZ	5	Age0-5	1	1	1	0.432943	0.629777	0.543718	1	0.880579	1	0.6205	1	1	0.841431	1	1	1	1	1	1	0.116918	0.839529	0.680971	0
		KEN	4	Age0-5	0.60623	1	0.867888	0.702742	0.985028	0.827155	1	0.81607	1	0.804756	1	1	1	1	1	1	1	0.882034	1	0	0.0894794	0	0
		KGZ	5	Age0-5	1	1	1	0.372493	0.612787	0.47452	1	0.774943	1	0.508822	1	0.959897	0.728037	0.859625	1	1	1	0.953765	1	0	0.275392	0.0185524	0
		KOR	3	Age0-5	0.612637	1	1	0.682582	1	1	1	1	1	0.775102	1	1	1	0.984693	1	1	1	1	1	0.0731846	1.08598	0.821168	0.983314
		KWT	5	Age0-5	0.336671	1	1	0.852953	0.836458	0.842825	1	1	1	0.708445	1	0.936519	1	1	1	1	1	1	1	0	0.541536	0.670081	0.489098
		LAO	6	Age0-5	0.301003	1	0.671249	0.414453	0.747539	0.777632	1	1	0.950134	0.450823	1	0.698985	1	0.263233	1	1	0.73315	0.99511	1	0	0	0	0
		LCA	7	Age0-5	0.178981	1	0.555198	0.363639	0.592469	0.529522	1	0.815177	0.750549	0.411004	1	0.596381	0.751628	0.261864	1	1	0.722243	0.926937	1	0	0.805618	0	1.19874
		LKA	6	Age0-5	0.233485	1	0.270536	0.259941	0.260301	0.610637	1	0.714638	0.873471	0.305863	1	0.442639	0.576589	0.167022	1	0.753841	1	0.775886	1	0	0.697638	0	0.638217
		LTU	1	Age0-5	1	1	1	0.406749	0.760148	0.535284	1	0.945968	1	0.614999	1	1	1	1	1	1	1	1	1	0.276012	2.367	1.15273	0.673956
		LUX	1	Age0-5	1	1	1	0.556348	0.916453	0.646733	1	1	1	0.759342	1	1	1	1	1	1	1	1	1	0.427932	2.32029	1.25344	0.501794
		LVA	1	Age0-5	1	1	1	0.408026	0.584181	0.568983	1	0.816595	1	0.526574	1	1	0.853221	1	1	1	1	1	1	0.294728	1.541	0.990021	1.03481
		MAR	5	Age0-5	0.459305	1	1	0.677845	0.755884	0.670486	1	1	1	0.546638	1	0.760506	0.922666	0.52997	1	1	0.978017	1	1	0	0	0.0404672	0.643868
		MDA	1	Age0-5	0.845976	1	1	0.249126	0.510772	0.370151	1	0.69704	0.979295	0.367366	1	0.959292	0.61659	0.560315	0.898297	0.959934	0.764204	0.982851	1	0	0.356317	0.376786	0.109209
		MDG	4	Age0-5	0.349316	1	0.5106	0.42434	0.70964	0.698664	1	0.899864	0.919813	0.60249	1	0.73459	0.737781	0.438426	1	1	0.946314	0.859858	1	0	0	0	0
		MDV	6	Age0-5	0.238368	1	0.85679	0.954511	0.678619	1	1	1	1	0.656207	1	0.99758	1	0.271201	1	1	1	1	1	0	0.379515	0	0.965318
		MEX	7	Age0-5	0.690438	1	1	0.981037	0.887279	1	1	1	1	0.815893	1	1	1	1	1	1	1	1	1	0	0.755684	0.420477	0.971532
		MKD	1	Age0-5	0.892904	1	1	0.374529	0.710666	0.488707	1	0.678206	1	0.487766	1	0.991257	0.733168	0.716064	1	1	0.876435	1	1	0.151199	0.512906	0.613341	0.281253
		MLI	4	Age0-5	0.761157	1	1	0.743184	0.92289	1	1	1	1	0.812627	1	1	1	1	1	1	1	1	1	0	0.0451823	0	0
		MLT	1	Age0-5	1	1	1	0.543494	0.869631	0.672995	1	1	1	0.652828	1	1	1	0.730568	1	1	1	1	1	0.0936471	0.819921	0.624888	0.943777
		MNE	1	Age0-5	1	1	1	0.508356	0.762955	0.516924	1	0.804542	1	0.600876	1	1	1	0.826715	1	1	1	1	1	0.0435531	0.867471	0.573516	0.704483
		MNG	5	Age0-5	0.839066	1	1	0.262898	0.420209	1	1	0.762792	1	0.395389	1	1	0.871015	1	0.840938	1	1	0.794548	0.877338	0	0.135526	0	0
		MOZ	4	Age0-5	0.313133	1	1	0.704972	0.876017	1	1	0.798248	1	0.722102	1	0.636766	1	1	1	1	0.988928	0.959306	1	0	0	0	0
		MRT	4	Age0-5	0.774169	1	1	0.438116	0.631389	0.936347	1	0.897703	1	0.569475	1	1	1	1	1	0.507734	1	1	1	0	0.963551	0.363471	0
		MUS	6	Age0-5	0.233526	1	1	0.54055	0.706548	0.958194	1	1	1	0.526311	1	0.809852	1	0.475809	1	1	1	1	1	0	0	0.376976	0
		MWI	4	Age0-5	0.22968	1	1	1	1	0.976239	1	1	1	0.983668	1	0.905793	1	0.341826	1	1	1	0.933477	1	0	0	0	0
		MYS	6	Age0-5	0.24735	1	1	0.385128	0.610158	0.738319	1	1	1	0.420636	1	0.850299	1	1	1	1	0.877557	1	1	0	1.61286	0.48741	1.02834
		NAM	4	Age0-5	0.419711	1	1	0.54037	0.485363	1	1	0.898068	1	0.584002	1	1	1	0.343247	1	1	1	0.93981	1	0	0	0.0392436	0
		NER	4	Age0-5	0.811927	1	1	1	1	1	1	1	1	0.880317	1	1	1	1	1	1	1	1	1	0	0.0807707	0	0
		NGA	4	Age0-5	0.337207	1	1	0.99079	1	1	1	1	1	1	1	0.905831	1	1	1	1	1	1	1	0	0.516187	0.0503075	0
		NIC	7	Age0-5	0.805283	1	1	0.738806	0.888697	0.90467	1	1	1	0.676883	1	1	1	1	1	0.906601	1	1	1	0	0.453506	0.0828705	0.704189
		NLD	1	Age0-5	1	1	1	0.553418	1	0.667899	1	1	1	0.960516	1	1	1	1	1	1	1	1	1	0.774996	4.53453	2.20127	0.51306
		NOR	1	Age0-5	1	1	1	0.594642	0.793956	0.636356	1	0.966879	1	0.665756	1	1	1	1	1	1	1	1	1	0.640535	2.94004	1.69177	0.314386
		NPL	6	Age0-5	0.544225	1	1	1	0.900376	1	1	1	1	0.717673	1	0.869856	1	0.318552	1	1	1	1	1	0	0	0	0
		NZL	2	Age0-5	1	1	1	0.422279	0.862021	0.682612	1	1	1	0.655035	1	1	0.968353	1	1	1	1	1	1	0.576403	3.64508	1.73964	0.764574
		PAK	6	Age0-5	1	1	1	1	0.952474	1	1	1	1	0.840432	1	1	1	0.776895	1	1	1	1	1	0	1.65883	0.584796	0.629208
		PAN	7	Age0-5	0.430248	1	1	0.503631	0.541605	0.880319	1	1	1	0.615914	1	1	1	0.542457	1	1	1	1	1	0	0.348505	0.229206	0.298202
		PER	7	Age0-5	0.532679	1	1	0.648235	0.917161	0.87799	1	1	1	0.911453	1	1	1	1	1	1	1	0.970442	1	0	0.0388729	0	0
		PHL	6	Age0-5	0.198602	1	0.653237	0.465358	0.606786	0.694559	1	1	0.899408	0.532356	1	0.774563	1	0.955372	1	1	0.715963	1	1	0	0.481815	0	0.0950021
		POL	1	Age0-5	1	1	1	0.461062	0.611851	0.568612	1	0.861071	1	0.566723	1	1	0.943535	1	1	1	1	1	1	0.182007	1.67525	0.825882	0.646265
		PRT	1	Age0-5	1	1	1	0.508882	0.852806	0.634025	1	1	1	0.685987	1	1	1	1	1	1	1	1	1	1.10802	2.35631	1.87473	0
		PRY	7	Age0-5	0.619988	1	1	0.412174	0.883728	0.832549	1	0.829484	1	0.865906	1	1	1	1	1	1	1	1	1	0	0.731594	0.499589	0.0277519
		PSE	5	Age0-5	1	1	1	1	1	1	1	1	1	1	1	1	1	1	1	1	1	1	1	0.291178	1.34118	0.965717	0.88614
		ROU	1	Age0-5	1	1	1	0.379594	0.711656	0.494641	1	0.851206	1	0.568517	1	1	0.905791	1	1	1	1	1	1	0.0662788	0.857088	0.605471	0
		RUS	1	Age0-5	0.957196	1	1	0.370161	0.553839	0.496655	1	0.755308	1	0.500982	1	0.964722	0.753993	0.744337	1	1	1	1	1	0.0189095	0.56335	0.482217	0.849367
		RWA	4	Age0-5	0.358604	1	0.515209	0.766916	1	0.959973	1	0.921105	1	1	1	0.947661	1	1	1	1	1	0.796063	1	0	0	0	0
		SAU	5	Age0-5	0.480538	1	1	0.636478	0.494912	0.658438	1	1	1	0.475295	1	0.780576	1	1	1	0.688798	1	1	1	0	0.748727	0.475231	0.330827
		SDN	4	Age0-5	1	1	1	0.586532	0.849525	1	1	0.920109	1	0.855069	1	1	1	0.851932	1	1	1	1	1	0	0.190538	0	0
		SEN	4	Age0-5	0.265592	1	1	0.510843	0.660169	0.964611	1	1	1	0.472996	1	0.713725	1	1	1	0.801938	1	1	1	0	0.108308	0.34832	0
		SLV	7	Age0-5	0.616891	1	1	0.830965	0.895213	1	1	1	1	0.673512	1	0.975575	1	0.485885	1	1	1	1	1	0	0.128293	0	0.619468
		SRB	1	Age0-5	0.858557	1	1	0.426451	0.654431	0.433267	1	0.6945	1	0.423023	1	0.821238	0.790804	0.518017	0.954187	1	0.931767	0.853393	1	0	0.0632078	0	0.0919835
		SUR	7	Age0-5	0.263072	1	1	0.387201	0.426338	0.559962	1	0.9695	0.834804	0.47491	1	0.65179	0.736373	0.233687	1	1	0.935546	1	1	0	0	0.0194532	1.02224
		SVK	1	Age0-5	0.742784	1	1	0.295274	0.475222	0.487807	1	0.591739	0.96546	0.374951	1	0.843974	0.703003	0.673381	0.831137	1	0.829348	1	1	0.110953	0.698354	0.518051	0.709199
		SVN	1	Age0-5	1	1	1	0.346818	0.551923	0.466288	1	0.747703	1	0.445012	1	1	0.795071	0.8876	1	1	1	1	1	0.051027	1.03268	0.721192	0
		SWE	1	Age0-5	1	1	1	0.495185	0.802179	0.557692	1	0.97673	1	0.649302	1	1	1	1	1	1	1	1	1	0.825323	4.09098	1.99642	0.339009
		SWZ	4	Age0-5	0.292718	1	1	0.564579	0.483326	0.80588	1	0.790504	1	0.466309	1	0.829807	1	0.23611	1	1	0.936548	0.858096	1	0	0	0	0
		THA	6	Age0-5	0.397408	1	1	0.44591	0.732489	0.732282	1	1	0.999304	0.516953	1	0.900874	1	1	1	1	0.765604	1	1	0	0.305285	0	1.42933
		TJK	5	Age0-5	0.420949	1	1	0.330143	0.438371	0.379006	1	0.54621	0.705697	0.356443	1	0.487661	0.57348	0.589952	0.627947	0.75264	0.599944	0.738808	1	0	0	0	0
		TTO	7	Age0-5	0.159731	1	1	0.507802	0.663368	0.61048	1	0.903349	0.768448	0.477781	1	0.546132	0.787165	0.245614	1	1	0.752601	1	1	0	0.573275	0.310841	1.32215
		TUN	5	Age0-5	0.725458	1	1	0.557994	0.738963	0.617078	1	0.814965	1	0.515817	1	0.872707	0.881142	1	1	1	0.987221	1	1	0	0.403345	0.496788	0.544827
		TUR	5	Age0-5	1	1	1	0.88829	1	0.979407	1	1	1	0.76287	1	1	1	1	1	1	1	1	1	0.406824	1.34124	1.22254	0.332778
		TZA	4	Age0-5	0.502619	1	1	0.784137	1	0.995088	1	1	1	0.880499	1	1	1	1	1	1	1	0.933705	1	0	0	0	0
		UKR	1	Age0-5	0.946589	1	1	0.387322	0.607101	0.497171	1	0.753835	1	0.558902	1	0.991385	0.77384	0.718047	1	1	0.989377	1	1	0	0.38485	0.368274	0.766532
		URY	7	Age0-5	1	1	1	0.506965	0.772635	1	1	1	1	1	1	1	1	1	1	1	1	1	1	0	1.19097	0.398386	0.534786
		USA	2	Age0-5	1	1	1	0.386186	0.788262	0.591626	1	0.963834	1	0.58	1	1	0.964343	1	1	1	1	1	1	0.686745	2.44076	2.16384	0.965652
		UZB	5	Age0-5	0.827538	1	1	0.394317	0.559309	0.50356	1	0.695815	1	0.485184	1	0.754751	0.710796	0.930862	0.935196	1	0.951184	0.923276	1	0	0.231711	0.0248994	0
		VCT	7	Age0-5	0.295548	1	1	0.556156	0.673081	0.70632	1	1	0.8822	0.636639	1	0.760361	0.93287	0.594925	1	1	0.844253	1	1	0	0.467896	0.1027	0.800146
		ZAF	4	Age0-5	0.416623	1	1	0.703307	0.650914	0.839952	1	1	1	0.612334	1	1	1	0.979642	1	0.91352	1	1	1	0	0.0393278	0.179386	0
		ZWE	4	Age0-5	0.250645	1	1	0.660705	0.490539	0.753391	1	0.811912	1	0.409092	1	0.752544	1	0.612013	1	0.580417	0.969145	0.95136	1	0	0	0	0
		AGO	4	Age6-10	0.719149	1	1	1	1	1	1	1	1	1	1	1	1	1	1	1	1	1	1	0	0	0	0
		ALB	1	Age6-10	1	1	1	0.616111	0.837324	0.986661	1	0.975552	1	0.901264	1	1	1	1	1	1	1	1	1	0	0.994669	0.357358	2.69381
		ARE	5	Age6-10	0.37867	1	1	1	1	1	1	1	1	0.912146	1	1	1	0.560935	1	1	1	1	1	0	0.205621	0.441571	1.63538
		ARG	7	Age6-10	1	1	1	0.582264	0.803207	1	1	1	1	1	1	1	1	1	1	1	1	1	1	0	1.07623	0.530927	2.22789
		ARM	1	Age6-10	1	1	1	0.960132	0.774952	1	1	1	1	0.861535	1	1	1	1	1	1	1	1	1	0	0.62156	0.219645	2.11573
		ATG	7	Age6-10	0.706787	1	1	0.715822	0.730565	1	1	1	1	0.959061	1	1	1	0.629394	1	1	1	1	1	0	0.178559	0	1.09507
		AUS	2	Age6-10	1	1	1	0.418856	0.612214	0.928676	1	1	1	0.669673	1	1	0.949663	1	1	1	1	1	1	0.700911	2.38781	1.51465	2.05883
		AUT	1	Age6-10	1	1	1	0.614941	0.719089	0.905387	1	1	1	0.805049	1	1	1	1	1	1	1	1	1	0.947668	2.83672	1.88167	2.23529
		AZE	1	Age6-10	1	1	1	1	0.839592	1	1	1	1	0.942807	1	1	1	0.760895	1	1	1	1	1	0	0.216887	0	0.265687
		BEL	1	Age6-10	1	1	1	0.543167	0.830282	0.957377	1	1	1	0.877615	1	1	1	1	1	1	1	1	1	0.839474	3.22124	1.94512	2.5175
		BEN	4	Age6-10	0.662193	1	1	1	1	1	1	1	1	1	1	1	1	1	1	1	1	1	1	0	0	0	0
		BFA	4	Age6-10	0.453433	1	1	1	1	1	1	1	1	1	1	1	1	1	1	0.837646	1	1	1	0	0	0	0
		BGD	6	Age6-10	0.338719	1	0.703144	0.416866	0.471954	1	1	1	0.875854	0.419739	1	0.725937	1	1	1	1	0.636363	1	1	0	0	0	0
		BGR	1	Age6-10	1	1	1	0.398863	0.646319	0.726556	1	0.982783	1	0.533978	1	1	1	0.73012	1	1	0.955335	1	1	0.0152805	0.648687	0.491728	1.72857
		BHS	7	Age6-10	0.383536	1	1	0.713576	0.821887	1	1	1	0.915688	0.971232	1	1	1	0.746417	1	1	1	1	1	0.0220624	0.617289	0.437181	1.89497
		BIH	1	Age6-10	1	1	1	0.607945	0.962076	0.783363	1	1	1	0.730833	1	1	1	1	1	1	0.975668	1	1	0	0.242251	0	0.791408
		BLR	1	Age6-10	1	1	1	0.746229	0.820793	1	1	1	1	1	1	1	1	1	1	1	1	1	1	0.469035	1.63804	1.12212	2.30156
		BLZ	7	Age6-10	0.532696	1	1	1	1	1	1	1	1	0.96894	1	1	1	0.434408	1	1	1	1	1	0	0.0303231	0	1.85522
		BOL	7	Age6-10	0.613652	1	1	0.736541	1	1	1	1	1	1	1	1	1	0.392629	1	1	1	1	1	0	0	0	0.740107
		BRA	7	Age6-10	1	1	1	0.983003	1	1	1	1	1	1	1	1	1	1	1	1	1	1	1	0	1.15582	0.613821	1.91052
		BRB	7	Age6-10	0.432491	1	1	0.789029	0.913973	1	1	1	1	0.947297	1	1	1	0.582429	1	1	1	1	1	0.0163489	0.575072	0.592239	2.73888
		BRN	6	Age6-10	0.388415	1	1	0.504027	0.76422	1	1	1	1	0.592242	1	1	1	1	1	1	0.994205	1	1	0	0.454675	0.115894	3.5231
		BWA	4	Age6-10	0.596288	1	1	0.883631	0.865203	1	1	1	1	0.967412	1	1	1	0.587662	1	1	1	1	1	0	0	0.0859942	0.240095
		CAF	4	Age6-10	0.726365	1	1	1	1	1	1	1	1	1	1	1	1	0.667964	1	1	1	1	1	0	0	0	0
		CAN	2	Age6-10	1	1	1	0.536084	0.963035	1	1	1	1	0.747393	1	1	1	1	1	1	1	1	1	0.780102	1.87665	1.47657	2.2294
		CHE	1	Age6-10	1	1	1	0.466248	0.668639	0.766221	1	0.893453	1	0.671685	1	1	1	1	1	1	1	1	1	0.585249	2.52698	1.44251	2.91178
		CHL	7	Age6-10	1	1	1	0.728704	0.997789	1	1	1	1	1	1	1	1	0.759149	1	1	1	1	1	0	0.446483	0.131301	2.28069
		CHN	3	Age6-10	0.810141	1	1	1	1	1	1	1	1	1	1	1	1	1	1	1	1	1	1	0	0.332656	0.128229	0
		CIV	4	Age6-10	0.558516	1	1	1	1	1	1	1	1	1	1	1	1	1	1	1	1	1	1	0	0.310406	0	0
		CMR	4	Age6-10	0.578115	1	1	1	1	1	1	1	1	1	1	1	1	1	1	1	1	1	1	0	0	0	0
		COG	4	Age6-10	0.604936	1	0.85499	0.877102	1	1	1	1	1	1	1	1	1	1	1	1	1	1	1	0	0	0	0
		COL	7	Age6-10	1	1	1	0.746875	1	1	1	1	1	1	1	1	1	1	1	1	1	1	1	0	0.715135	0.176096	2.60151
		CPV	4	Age6-10	0.736761	1	1	1	1	1	1	1	1	1	1	1	1	0.675272	1	1	1	1	1	0	0.264585	0.0863145	0
		CRI	7	Age6-10	1	1	1	0.987942	1	1	1	1	1	1	1	1	1	1	1	1	1	1	1	0	1.30493	0.493249	2.6586
		CYP	1	Age6-10	1	1	1	0.3758	0.52794	0.662204	1	0.847478	1	0.592604	1	1	0.985083	0.704825	1	1	0.921527	1	1	0.178628	0.676497	0.623349	1.10719
		CZE	1	Age6-10	1	1	1	0.470521	0.613814	0.947822	1	1	1	0.652886	1	1	1	1	1	1	1	1	1	0.67879	1.43719	1.16637	2.95136
		DEU	1	Age6-10	1	1	1	0.484662	0.679415	0.795865	1	1	1	0.72862	1	1	1	1	1	1	1	1	1	0.659424	2.72859	1.59879	2.34247
		DJI	4	Age6-10	0.396814	1	1	0.872571	1	1	1	1	1	0.85712	1	1	1	1	1	1	1	1	1	0	0.000516981	0	0.283399
		DMA	7	Age6-10	1	1	1	1	1	1	1	1	1	1	1	1	1	0.899264	1	1	1	1	1	0	0.75445	0	1.92695
		DNK	1	Age6-10	1	1	1	0.657661	0.859874	0.953858	1	1	1	0.904838	1	1	1	1	1	1	1	1	1	0.643134	3.67671	1.7726	2.62762
		DOM	7	Age6-10	0.622649	1	1	0.915447	1	1	1	1	1	1	1	1	1	1	1	1	1	1	1	0	0.807573	0.356872	1.08084
		DZA	5	Age6-10	0.806945	1	1	1	1	1	1	1	1	1	1	1	1	0.995845	1	1	1	1	1	0	0.0186096	0.0913782	1.27808
		ECU	7	Age6-10	1	1	1	0.682643	0.780531	1	1	1	1	1	1	1	1	1	1	1	1	1	1	0	1.56637	0.546862	0.247687
		EGY	5	Age6-10	0.884457	1	1	1	1	1	1	1	1	1	1	1	1	0.760532	1	1	1	1	1	0	0.132393	0	1.81836
		ESP	1	Age6-10	1	1	1	0.495635	0.716572	0.818992	1	1	1	0.745814	1	1	1	0.923856	1	1	1	1	1	1.01738	1.30757	1.43603	0.669329
		EST	1	Age6-10	1	1	1	0.669148	0.837143	0.899858	1	1	1	0.865875	1	1	1	1	1	1	1	1	1	0	1.53366	0.602095	2.66307
		ETH	4	Age6-10	0.686353	1	0.870986	1	1	1	1	1	1	1	1	1	1	0.908094	1	1	1	1	1	0	0	0	0
		FIN	1	Age6-10	1	1	1	0.589648	0.673022	0.792023	1	1	1	0.758058	1	1	1	1	1	1	1	1	1	0.305744	2.42269	1.07468	1.13068
		FJI	2	Age6-10	0.474082	1	1	1	0.895596	1	1	1	1	0.988323	1	0.902851	1	0.850314	1	1	1	1	1	0	2.35612	0.771639	2.59372
		FRA	1	Age6-10	1	1	1	0.451187	0.753166	0.850719	1	1	1	0.793113	1	1	1	1	1	1	1	1	1	0.579543	2.92691	1.6171	1.60395
		GBR	1	Age6-10	1	1	1	0.527049	0.676569	0.869919	1	1	1	0.759595	1	1	1	1	1	1	1	1	1	0.239973	1.17503	0.792701	1.6996
		GEO	1	Age6-10	0.927396	1	1	1	0.614615	1	1	1	1	0.685916	1	1	1	0.463883	1	0.898771	1	1	1	0	0.0717305	0	1.62732
		GHA	4	Age6-10	0.778792	1	1	1	1	1	1	1	1	1	1	1	1	1	1	1	1	1	1	0	0	0	0
		GIN	4	Age6-10	0.520416	1	1	0.892988	0.99119	1	1	1	1	1	1	1	1	1	1	1	1	1	1	0	0.0319157	0	0
		GMB	4	Age6-10	0.39216	1	1	1	0.950119	1	1	1	1	0.87901	1	1	1	1	1	0.839625	1	1	1	0	0.150426	0.119596	0.18805
		GNB	4	Age6-10	0.420201	1	1	0.683797	0.823383	1	1	1	1	0.895449	1	1	1	1	1	1	1	1	1	0	0.129507	0.0797419	0
		GRC	1	Age6-10	1	1	1	0.589502	0.930919	0.982517	1	1	1	1	1	1	1	1	1	1	1	1	1	0.921246	2.24257	1.59438	0.87982
		GRD	7	Age6-10	0.328855	1	1	0.892991	1	1	1	1	0.957972	0.871056	1	1	1	0.407449	1	1	1	1	1	0	0.836095	0.341785	1.71072
		GUY	7	Age6-10	0.667645	1	0.538582	0.908334	0.869452	1	1	1	1	1	1	1	1	0.449835	1	1	1	1	1	0	0.579144	0	1.80146
		HND	7	Age6-10	0.916817	1	1	1	1	1	1	1	1	1	1	1	1	1	1	1	1	1	1	0	0.73095	0.0971113	1.91235
		HRV	1	Age6-10	1	1	1	0.415149	0.542969	0.748198	1	0.888958	1	0.623327	1	1	1	1	1	1	1	1	1	0.119756	1.15677	0.703764	3.91047
		HTI	7	Age6-10	0.371775	1	1	0.931681	1	1	1	1	1	1	1	0.859286	1	1	1	1	1	1	1	0	0	0	0.193588
		HUN	1	Age6-10	0.992902	1	1	0.404583	0.531106	0.693053	1	0.824294	0.952497	0.578873	1	1	1	1	1	1	0.943224	1	1	0.578965	1.58689	1.23159	1.9469
		IDN	6	Age6-10	0.351647	1	0.964559	0.64437	0.886161	1	1	1	0.981956	0.643568	1	0.961363	1	1	1	1	0.783834	1	1	0	0.578327	0	0.37693
		IND	6	Age6-10	0.983593	1	1	0.517485	0.985741	1	1	1	1	0.769167	1	1	1	1	1	1	1	1	1	0	0.0236361	0	1.28978
		IRL	1	Age6-10	1	1	1	0.621508	0.996429	0.919693	1	1	1	1	1	1	1	1	1	1	1	1	1	0.668006	3.86693	1.86832	2.18585
		IRN	6	Age6-10	0.797951	1	1	1	1	1	1	1	1	1	1	1	1	0.865172	1	1	1	1	1	0	0.287482	0.211588	1.40421
		IRQ	5	Age6-10	0.297578	1	1	1	0.783212	1	1	1	1	0.695348	1	0.959798	1	1	1	1	1	1	1	0	0.0453696	0.0258557	0.513595
		ISL	1	Age6-10	1	1	1	0.421897	0.574968	0.745244	1	1	1	0.725318	1	1	0.952712	1	1	1	1	1	1	0.00195228	1.84917	0.814334	2.0726
		ISR	5	Age6-10	1	1	1	0.854953	1	1	1	1	1	1	1	1	1	1	1	1	1	1	1	0.762711	1.60089	1.54168	2.00466
		ITA	1	Age6-10	1	1	1	0.597205	0.833921	0.880217	1	1	1	0.80823	1	1	1	1	1	1	1	1	1	0.845283	1.92925	1.5226	1.05602
		JAM	7	Age6-10	0.77635	1	1	0.866176	1	1	1	1	1	1	1	1	1	1	1	1	1	1	1	0	1.04465	0.335351	2.21306
		JOR	5	Age6-10	0.621513	1	1	1	1	1	1	1	1	0.944858	1	1	1	1	1	1	1	1	1	0.0424945	0.613744	0.577189	2.34036
		JPN	3	Age6-10	0.843326	1	1	0.546784	0.964802	1	1	1	1	0.816653	1	1	1	0.856857	1	1	1	1	1	0.0128524	0.533912	0.303225	2.57115
		KAZ	5	Age6-10	1	1	1	0.649126	0.75036	0.986242	1	1	1	0.937835	1	1	1	1	1	1	1	1	1	0.156825	1.15907	0.776289	1.32088
		KEN	4	Age6-10	0.774769	1	0.980563	1	1	1	1	1	1	1	1	1	1	1	1	1	1	1	1	0	0	0	0
		KGZ	5	Age6-10	1	1	1	0.582726	0.793477	0.863882	1	1	1	0.785499	1	1	1	1	1	1	1	1	1	0	0.472752	0.0888875	0.76955
		KOR	3	Age6-10	0.750782	1	1	0.867284	1	1	1	1	1	1	1	1	1	1	1	1	1	1	1	0.0622496	0.885773	0.61504	2.86103
		KWT	5	Age6-10	0.517441	1	1	1	1	1	1	1	1	1	1	1	1	1	1	1	1	1	1	0.146975	0.831169	0.814443	2.02465
		LAO	6	Age6-10	0.412355	1	0.658306	0.552535	0.838846	1	1	1	0.949818	0.634904	1	0.916331	1	0.332875	1	1	0.790354	1	1	0	0	0	0
		LCA	7	Age6-10	0.267041	1	0.801169	0.615569	0.894877	1	1	1	0.953824	0.737774	1	0.979373	1	0.383375	1	1	1	1	1	0	0.703608	0.141958	2.52808
		LKA	6	Age6-10	0.398728	1	0.325371	0.480553	0.404038	1	1	1	1	0.553966	1	0.720546	1	0.254252	1	1	1	1	1	0	0.903196	0	2.02886
		LTU	1	Age6-10	1	1	1	0.67357	0.871186	0.94638	1	1	1	0.914585	1	1	1	1	1	1	1	1	1	0.332821	2.22784	1.14098	3.17715
		LUX	1	Age6-10	1	1	1	0.570845	0.786527	0.843971	1	1	1	0.850928	1	1	1	1	1	1	1	1	1	0.26218	1.73793	0.924801	2.07003
		LVA	1	Age6-10	1	1	1	0.62787	0.6962	0.966253	1	1	1	0.801284	1	1	1	1	1	1	1	1	1	0.448675	1.85507	1.16893	3.8297
		MAR	5	Age6-10	0.625883	1	1	1	1	1	1	1	1	0.957394	1	1	1	0.94823	1	1	1	1	1	0	0.0166829	0.0447409	2.25822
		MDA	1	Age6-10	1	1	1	0.388818	0.649951	0.643337	1	0.987646	0.962857	0.559883	1	1	0.901513	0.691544	1	1	0.839706	1	1	0	0.498171	0.377159	1.71818
		MDG	4	Age6-10	0.575765	1	0.54763	0.820396	1	1	1	1	1	1	1	1	1	0.528061	1	1	1	1	1	0	0	0	0
		MDV	6	Age6-10	0.334797	1	0.937499	1	0.77161	1	1	1	1	1	1	1	1	0.498596	1	1	1	1	1	0	0.153095	0	2.45031
		MEX	7	Age6-10	0.891576	1	1	1	1	1	1	1	1	1	1	1	1	1	1	1	1	1	1	0	0.531015	0.275079	2.2311
		MKD	1	Age6-10	1	1	1	0.556652	0.941098	0.843007	1	0.909897	1	0.734418	1	1	1	0.936964	1	1	0.966741	1	1	0.0829122	0.640921	0.558897	2.18303
		MLI	4	Age6-10	0.947921	1	1	1	1	1	1	1	1	1	1	1	1	1	1	1	1	1	1	0	0.0527765	0	0
		MLT	1	Age6-10	0.841129	1	1	0.600165	0.815667	0.918728	1	1	1	0.7775	1	1	1	0.64653	1	1	1	1	1	0	0.559075	0.398801	3.00743
		MNE	1	Age6-10	1	1	1	0.696778	0.923765	0.854853	1	1	1	0.893737	1	1	1	0.974354	1	1	1	1	1	0.151131	1.2363	0.739946	3.18126
		MNG	5	Age6-10	1	1	1	0.414512	0.558916	1	1	1	1	0.622532	1	1	1	1	1	1	1	1	1	0	0.232123	0.100182	0.105892
		MOZ	4	Age6-10	0.632224	1	1	1	1	1	1	1	1	1	1	1	1	1	1	1	1	1	1	0	0	0	0
		MRT	4	Age6-10	0.970523	1	1	0.8705	1	1	1	1	1	1	1	1	1	1	1	0.706093	1	1	1	0	0.635511	0.155696	0.579486
		MUS	6	Age6-10	0.399425	1	1	0.957747	1	1	1	1	1	0.964871	1	1	1	0.569044	1	1	1	1	1	0	0.0238499	0.205019	0.138086
		MWI	4	Age6-10	0.433736	1	1	1	1	1	1	1	1	1	1	1	1	0.463799	1	1	1	1	1	0	0	0	0
		MYS	6	Age6-10	0.305026	1	1	0.484119	0.673397	1	1	1	1	0.589251	1	1	1	1	1	1	0.905108	1	1	0	1.13646	0.276707	2.89544
		NAM	4	Age6-10	0.602311	1	1	1	0.748109	1	1	1	1	1	1	1	1	0.571385	1	1	1	1	1	0	0	0.377903	0
		NER	4	Age6-10	1	1	1	1	1	1	1	1	1	1	1	1	1	1	1	1	1	1	1	0	0.111644	0.0642869	0
		NGA	4	Age6-10	0.644726	1	1	1	1	1	1	1	1	1	1	1	1	1	1	1	1	1	1	0	0.15703	0	0
		NIC	7	Age6-10	1	1	1	1	1	1	1	1	1	1	1	1	1	1	1	1	1	1	1	0	0.262208	0	1.80295
		NLD	1	Age6-10	1	1	1	0.577914	0.895535	0.880224	1	1	1	1	1	1	1	1	1	1	1	1	1	0.430222	3.20454	1.5037	2.08475
		NOR	1	Age6-10	1	1	1	0.635296	0.700175	0.828681	1	0.996695	1	0.746194	1	1	1	1	1	1	1	1	1	0.361935	2.04922	1.16436	1.69026
		NPL	6	Age6-10	0.6614	1	1	1	1	1	1	1	1	1	1	1	1	0.433943	1	1	1	1	1	0	0	0	0
		NZL	2	Age6-10	1	1	1	0.459853	0.763715	0.958677	1	1	1	0.764214	1	1	1	1	1	1	1	1	1	0.379646	2.75534	1.31691	2.61078
		PAK	6	Age6-10	1	1	1	1	1	1	1	1	1	1	1	1	1	0.997888	1	1	1	1	1	0	1.13062	0.233489	1.7444
		PAN	7	Age6-10	0.58598	1	1	0.79567	0.808225	1	1	1	1	1	1	1	1	0.54409	1	1	1	1	1	0	0.242915	0.0975861	1.12504
		PER	7	Age6-10	0.71875	1	1	1	1	1	1	1	1	1	1	1	1	1	1	1	1	1	1	0	0	0	0.535704
		PHL	6	Age6-10	0.271702	1	0.677367	0.581805	0.675356	1	1	1	0.910988	0.728139	1	1	1	0.82361	1	1	0.775931	1	1	0	0.287841	0	1.12559
		POL	1	Age6-10	1	1	1	0.732463	0.747784	1	1	1	1	0.883731	1	1	1	1	1	1	1	1	1	0.360323	1.98171	1.04962	3.05662
		PRT	1	Age6-10	1	1	1	0.548107	0.765247	0.832665	1	1	1	0.77853	1	1	1	1	1	1	1	1	1	0.691408	1.67398	1.2947	0.945735
		PRY	7	Age6-10	0.851976	1	1	0.745699	1	1	1	1	1	1	1	1	1	0.982112	1	1	1	1	1	0	0.490627	0.283925	0.690664
		PSE	5	Age6-10	1	1	1	1	1	1	1	1	1	1	1	1	1	1	1	1	1	1	1	0.485974	1.9227	1.27076	2.76668
		ROU	1	Age6-10	1	1	1	0.562956	0.870812	0.849248	1	1	1	0.834199	1	1	1	1	1	1	1	1	1	0.0891462	1.09158	0.664847	1.18586
		RUS	1	Age6-10	1	1	1	0.568851	0.678872	0.900444	1	1	1	0.780461	1	1	1	0.920915	1	1	1	1	1	0.0744519	0.83511	0.572866	3.62573
		RWA	4	Age6-10	0.595628	1	0.611548	1	1	1	1	1	1	1	1	1	1	1	1	1	1	1	1	0	0	0	0
		SAU	5	Age6-10	0.630972	1	1	1	0.777629	1	1	1	1	0.875398	1	1	1	1	1	1	1	1	1	0	0.848126	0.532208	1.65725
		SDN	4	Age6-10	1	1	1	1	1	1	1	1	1	1	1	1	1	1	1	1	1	1	1	0	0.219558	0	0.0952763
		SEN	4	Age6-10	0.408395	1	1	0.967834	1	1	1	1	1	0.923115	1	1	1	1	1	1	1	1	1	0	0	0.136716	0
		SLV	7	Age6-10	0.813783	1	1	1	1	1	1	1	1	1	1	1	1	0.648827	1	1	1	1	1	0	0.0297088	0	1.65413
		SRB	1	Age6-10	1	1	1	0.605635	0.841636	0.730782	1	0.902508	1	0.634575	1	1	1	0.624458	1	1	0.994993	1	1	0	0.275654	0.0615837	1.69863
		SUR	7	Age6-10	0.411331	1	1	0.649123	0.598808	1	1	1	1	0.833531	1	1	1	0.358542	1	1	1	1	1	0	0	0	2.29972
		SVK	1	Age6-10	0.902478	1	1	0.443828	0.589151	0.815878	1	0.857755	0.980332	0.588269	1	1	1	0.845907	1	1	0.948168	1	1	0.239512	0.904582	0.66783	3.26384
		SVN	1	Age6-10	1	1	1	0.511755	0.687304	0.827292	1	1	1	0.688233	1	1	1	1	1	1	1	1	1	0.190754	1.37077	0.881506	1.428
		SWE	1	Age6-10	1	1	1	0.528355	0.688884	0.74514	1	1	1	0.725027	1	1	1	1	1	1	1	1	1	0.506472	2.89922	1.3927	1.75131
		SWZ	4	Age6-10	0.412679	1	1	1	0.736499	1	1	1	1	0.856025	1	1	1	0.361415	1	1	1	1	1	0	0	0	0.382808
		THA	6	Age6-10	0.460149	1	1	0.570559	0.787519	1	1	1	0.934711	0.691505	1	1	1	1	1	1	0.785185	1	1	0	0.212514	0	3.68274
		TJK	5	Age6-10	0.525802	1	1	0.535647	0.589398	0.675019	1	0.767856	0.753757	0.546347	1	0.651565	0.82525	0.817108	0.781204	0.929664	0.715314	1	1	0	0	0	0.377207
		TTO	7	Age6-10	0.24606	1	1	0.83432	1	1	1	1	0.961025	0.807772	1	0.902329	1	0.361082	1	1	1	1	1	0	0.520412	0.341241	2.8133
		TUN	5	Age6-10	0.944565	1	1	1	1	1	1	1	1	0.957489	1	1	1	1	1	1	1	1	1	0	0.40759	0.375142	2.06722
		TUR	5	Age6-10	1	1	1	1	1	1	1	1	1	1	1	1	1	1	1	1	1	1	1	0.251501	1.30255	1.0189	1.61364
		TZA	4	Age6-10	0.780829	1	1	1	1	1	1	1	1	1	1	1	1	1	1	1	1	1	1	0	0	0	0
		UKR	1	Age6-10	1	1	1	0.602017	0.735088	0.88254	1	1	1	0.849015	1	1	1	0.876542	1	1	1	1	1	0	0.589099	0.42158	3.37056
		URY	7	Age6-10	1	1	1	0.78335	1	1	1	1	1	1	1	1	1	1	1	1	1	1	1	0	1.38194	0.421328	1.51088
		USA	2	Age6-10	1	1	1	0.425187	0.719413	0.827095	1	1	1	0.696962	1	1	1	1	1	1	1	1	1	0.511075	1.85877	1.6399	2.99247
		UZB	5	Age6-10	1	1	1	0.60675	0.698189	0.853903	1	0.96182	1	0.721461	1	0.970769	0.98799	1	1	1	1	1	1	0	0.300945	0.0171157	0
		VCT	7	Age6-10	0.446504	1	1	0.918964	0.971559	1	1	1	1	1	1	1	1	0.832625	1	1	1	1	1	0	0.608198	0.35774	1.94629
		ZAF	4	Age6-10	0.548998	1	1	1	0.986755	1	1	1	1	1	1	1	1	1	1	1	1	1	1	0	0.13276	0.126191	0.373984
		ZWE	4	Age6-10	0.358556	1	1	1	0.786152	1	1	1	1	0.784184	1	1	1	0.612496	1	0.997973	1	1	1	0	0	0	0.0791311
		AGO	4	Age11-19	0.900028	1	1	1	1	1	1	1	1	1	1	1	1	1	1	1	1	1	1	0	0	0	0
		ALB	1	Age11-19	1	1	1	0.7221	0.761446	1	1	0.94835	1	1	1	1	1	1	1	1	1	1	1	0	0.642033	0.145969	2.98056
		ARE	5	Age11-19	0.496678	1	1	1	1	1	1	1	1	1	1	1	1	0.623277	1	1	1	1	1	0	0.167915	0.324011	1.56541
		ARG	7	Age11-19	1	1	1	0.639403	0.665694	1	1	1	1	1	1	1	1	1	1	1	1	1	1	0	0.619141	0.211866	2.25443
		ARM	1	Age11-19	1	1	1	1	0.730263	1	1	1	1	1	1	1	1	1	1	1	1	1	1	0	0.366379	0.0529937	2.47055
		ATG	7	Age11-19	0.784202	1	1	0.782649	0.631848	1	1	1	1	1	1	1	1	0.63929	1	1	1	1	1	0	0.0153479	0	1.11408
		AUS	2	Age11-19	1	1	1	0.455491	0.494117	1	1	1	1	0.772231	1	1	0.883273	1	1	1	1	1	1	0.435159	1.58739	1.0388	2.53966
		AUT	1	Age11-19	1	1	1	0.628127	0.574815	0.955536	1	0.995046	1	0.887525	1	1	1	1	1	1	1	1	1	0.591543	1.85853	1.26811	2.74457
		AZE	1	Age11-19	1	1	0.978387	1	0.791439	1	1	1	1	1	1	1	1	0.754745	1	1	1	1	1	0	0.0326415	0	0.410711
		BEL	1	Age11-19	1	1	1	0.597365	0.681241	1	1	1	1	1	1	1	1	1	1	1	1	1	1	0.431685	2.03416	1.21674	3.06156
		BEN	4	Age11-19	0.838505	1	1	1	1	1	1	1	1	1	1	1	1	0.923702	1	1	1	1	1	0	0	0	0
		BFA	4	Age11-19	0.520804	1	1	1	1	1	1	1	1	1	1	1	1	1	1	0.937632	1	1	1	0	0	0	0
		BGD	6	Age11-19	0.431758	1	0.566771	0.498314	0.468386	1	1	1	0.841743	0.528682	1	0.684243	1	0.942325	1	1	0.737086	1	1	0	0	0	0
		BGR	1	Age11-19	1	1	1	0.476531	0.581224	0.846207	1	0.978617	0.911363	0.655828	1	1	1	0.741396	0.970905	1	1	1	1	0	0.447277	0.306558	2.02913
		BHS	7	Age11-19	0.450352	1	1	0.771042	0.700571	1	1	1	0.834003	1	1	1	1	0.780619	1	1	1	1	1	0	0.528532	0.351358	1.9222
		BIH	1	Age11-19	1	1	1	0.736105	0.886948	0.921453	1	1	0.914458	0.911404	1	0.943776	0.987107	1	1	1	1	1	1	0	0.0494562	0	1.00337
		BLR	1	Age11-19	1	1	1	0.918895	0.731246	1	1	1	1	1	1	1	1	1	1	1	1	1	1	0.340039	1.2651	0.878423	2.70781
		BLZ	7	Age11-19	0.645465	1	1	1	1	1	1	1	1	1	1	1	1	0.447741	1	1	1	1	1	0	0	0	1.87437
		BOL	7	Age11-19	0.675079	1	1	0.818396	0.921854	1	1	1	1	1	1	1	1	0.392368	1	1	1	1	1	0	0	0	0.749176
		BRA	7	Age11-19	1	1	1	1	1	1	1	1	1	1	1	1	1	1	1	1	1	1	1	0	0.729848	0.29868	1.93867
		BRB	7	Age11-19	0.496353	1	1	0.87525	0.793444	1	1	1	1	1	1	1	1	0.592907	1	1	1	1	1	0	0.428383	0.417001	2.76877
		BRN	6	Age11-19	0.429273	1	1	0.524581	0.621196	1	1	1	0.877027	0.668588	1	1	1	1	1	1	1	1	1	0	0.204039	0	3.36349
		BWA	4	Age11-19	0.663719	1	1	0.961494	0.749844	1	1	1	1	1	1	1	1	0.596035	1	1	1	1	1	0	0	0	0.668555
		CAF	4	Age11-19	0.898728	1	1	1	0.969054	1	1	1	1	1	1	1	1	0.639585	1	1	1	1	1	0	0	0	0
		CAN	2	Age11-19	1	1	1	0.583202	0.809726	1	1	0.990231	0.98499	0.857518	1	1	1	1	1	1	1	1	1	0.499178	1.17907	1.00157	2.73681
		CHE	1	Age11-19	1	1	1	0.493746	0.529429	0.834223	1	0.819626	1	0.741565	1	1	0.927487	1	0.966088	1	1	1	1	0.251945	1.53988	0.858018	3.51654
		CHL	7	Age11-19	1	1	1	0.802045	0.859983	1	1	1	1	1	1	1	1	0.733186	1	1	1	1	1	0	0.171821	0	2.31367
		CHN	3	Age11-19	0.882969	1	1	1	1	1	1	1	1	1	1	1	1	1	1	1	1	1	1	0	0.114754	0	0
		CIV	4	Age11-19	0.704581	1	0.924387	1	1	1	1	1	1	1	1	1	1	1	1	1	1	1	1	0	0	0	0
		CMR	4	Age11-19	0.723728	1	1	1	1	1	1	1	1	1	1	1	1	1	1	1	1	1	1	0	0	0	0
		COG	4	Age11-19	0.786925	1	0.729818	0.993103	1	1	1	1	1	1	1	1	1	1	1	1	1	1	1	0	0	0	0
		COL	7	Age11-19	1	1	1	0.839853	0.907372	1	1	1	1	1	1	1	1	1	1	1	1	1	1	0	0.270976	0	2.63219
		CPV	4	Age11-19	0.814204	1	1	1	0.994913	1	1	1	1	1	1	1	1	0.701203	1	1	1	1	1	0	0.127334	0	0.191642
		CRI	7	Age11-19	1	1	1	1	1	1	1	1	1	1	1	1	1	1	1	1	1	1	1	0	0.702271	0.131262	2.69556
		CYP	1	Age11-19	0.96449	1	1	0.402066	0.436571	0.727678	0.903656	0.799556	0.79654	0.654447	1	1	0.907159	0.606882	0.849721	1	0.928937	1	1	0.00171014	0.350649	0.346835	1.44656
		CZE	1	Age11-19	1	1	1	0.57149	0.551516	1	1	1	1	0.823707	1	1	1	0.978381	1	1	1	1	1	0.576437	1.14226	0.981424	3.39988
		DEU	1	Age11-19	1	1	1	0.515017	0.537569	0.849152	1	0.920786	1	0.812718	1	1	1	1	1	1	1	1	1	0.329901	1.71481	0.999581	2.85931
		DJI	4	Age11-19	0.455827	1	0.958232	0.928601	1	1	1	1	1	0.969306	1	0.996109	1	1	1	1	1	1	1	0	0	0	0.732917
		DMA	7	Age11-19	1	1	0.864458	1	1	1	1	1	1	1	1	1	1	0.902637	1	1	1	1	1	0	0.432108	0	1.96068
		DNK	1	Age11-19	1	1	1	0.689495	0.654668	1	1	1	1	0.973436	1	1	1	1	1	1	1	1	1	0.253128	2.28904	1.04433	3.19355
		DOM	7	Age11-19	0.703989	1	1	1	1	1	1	1	1	1	1	1	1	1	1	1	1	1	1	0	0.38202	0.0505173	1.10671
		DZA	5	Age11-19	0.894563	1	1	1	1	1	1	1	1	1	1	1	1	1	1	1	1	1	1	0	0	0	1.21653
		ECU	7	Age11-19	1	1	1	0.746852	0.656203	1	1	1	1	1	1	1	1	1	1	1	1	1	1	0	0.874102	0.151499	0.264924
		EGY	5	Age11-19	0.98439	1	1	1	1	1	1	1	1	1	1	1	1	0.803093	1	1	1	1	1	0	0	0	1.7475
		ESP	1	Age11-19	1	1	1	0.541195	0.597936	0.900627	1	1	0.967741	0.842911	1	1	1	0.820431	1	1	1	1	1	0.616964	0.826832	0.945155	0.926817
		EST	1	Age11-19	1	1	1	0.835156	0.755786	1	1	1	1	1	1	1	1	1	1	1	1	1	1	0	1.11252	0.388214	3.08632
		ETH	4	Age11-19	0.734855	1	0.693848	1	1	1	1	1	1	1	1	1	1	0.764999	1	1	1	1	1	0	0	0	0
		FIN	1	Age11-19	1	1	1	0.612337	0.517083	0.839908	1	0.956639	1	0.826251	1	1	1	1	1	1	1	1	1	0.0547893	1.43995	0.589014	1.46367
		FJI	2	Age11-19	0.480434	1	1	1	0.727899	1	1	1	0.913017	1	1	0.747361	1	0.711075	1	1	1	1	1	0	1.55576	0.382175	2.43123
		FRA	1	Age11-19	1	1	1	0.492159	0.600167	0.940508	1	1	1	0.867759	1	1	1	1	1	1	1	1	1	0.258627	1.84547	1.00024	2.0005
		GBR	1	Age11-19	1	1	1	0.565777	0.550592	0.952269	1	0.97142	0.960861	0.862783	1	1	1	1	1	1	1	1	1	0.0530111	0.677121	0.464243	2.11828
		GEO	1	Age11-19	0.987005	1	1	1	0.568396	1	1	1	1	0.879077	1	1	1	0.443887	1	0.976721	1	1	1	0	0	0	1.92486
		GHA	4	Age11-19	1	1	1	1	1	1	1	1	1	1	1	1	1	1	1	1	1	1	1	0	0	0	0
		GIN	4	Age11-19	0.637237	1	1	1	0.839562	1	1	1	0.994658	1	1	0.920433	1	1	1	1	1	1	1	0	0	0	0
		GMB	4	Age11-19	0.456673	1	1	1	0.75936	1	1	1	1	0.992796	1	1	1	1	1	0.978797	1	1	1	0	0	0	0.57985
		GNB	4	Age11-19	0.497229	1	1	0.745778	0.68672	1	1	1	1	1	1	0.89568	1	1	1	1	1	1	1	0	0	0	0
		GRC	1	Age11-19	1	1	1	0.635285	0.74514	1	1	1	1	1	1	1	1	1	1	1	1	1	1	0.478583	1.36555	0.976027	1.17085
		GRD	7	Age11-19	0.393572	1	1	0.991206	0.974928	1	1	1	0.870225	1	1	0.905079	1	0.414392	1	1	1	1	1	0	0.575527	0.190414	1.72791
		GUY	7	Age11-19	0.750907	1	0.513258	1	0.782379	1	1	1	1	1	1	1	1	0.436274	1	1	1	1	1	0	0.282107	0	1.82252
		HND	7	Age11-19	0.967612	1	1	1	0.905603	1	1	1	1	1	1	1	1	1	1	1	1	1	1	0	0.252187	0	1.93214
		HRV	1	Age11-19	1	1	1	0.483992	0.470374	0.817467	1	0.822546	0.911822	0.749478	1	1	1	1	0.980484	1	1	1	1	0	0.755517	0.398024	4.45431
		HTI	7	Age11-19	0.462361	1	1	1	1	1	1	0.971769	0.929176	1	1	0.779977	1	1	1	1	1	1	1	0	0	0	0.201352
		HUN	1	Age11-19	1	1	1	0.490188	0.478765	0.799699	0.955091	0.844441	0.832312	0.73081	1	0.946455	1	1	0.986168	1	1	1	1	0.379853	1.21107	0.914689	2.2871
		IDN	6	Age11-19	0.40608	1	0.783801	0.670441	0.725589	1	1	1	0.835769	0.71822	1	0.812256	1	1	1	1	0.797174	1	1	0	0.204309	0	0.321498
		IND	6	Age11-19	1	1	1	0.625254	0.94299	1	1	1	1	0.919956	1	1	1	0.862133	1	1	1	1	1	0	0	0	0.467903
		IRL	1	Age11-19	1	1	1	0.656185	0.761597	0.972787	1	1	1	1	1	1	1	1	1	1	1	1	1	0.300327	2.42818	1.1374	2.66997
		IRN	6	Age11-19	0.962214	1	1	1	1	1	1	1	1	1	1	1	1	0.990065	1	1	1	1	1	0	0.129134	0.0927202	1.33768
		IRQ	5	Age11-19	0.392959	1	1	1	0.801317	1	1	1	1	0.95377	1	0.951832	1	1	1	1	1	1	1	0	0	0	0.476137
		ISL	1	Age11-19	1	1	1	0.443535	0.455787	0.833903	1	1	1	0.828081	1	1	0.863188	1	1	1	1	1	1	0	1.10636	0.416583	2.55308
		ISR	5	Age11-19	1	1	1	1	1	1	1	1	1	1	1	1	1	1	1	1	1	1	1	0.680693	1.35988	1.32155	1.92782
		ITA	1	Age11-19	1	1	1	0.640784	0.680011	0.952712	1	1	1	0.902934	1	1	1	1	1	1	1	1	1	0.45296	1.19385	0.950833	1.37387
		JAM	7	Age11-19	0.820522	1	1	0.974963	0.889351	1	1	1	1	1	1	1	1	1	1	1	1	1	1	0	0.677023	0.169695	2.24867
		JOR	5	Age11-19	0.717805	1	1	1	1	1	1	1	1	1	1	1	1	1	1	1	1	1	1	0	0.411535	0.37405	2.25315
		JPN	3	Age11-19	0.835988	1	1	0.578548	0.785048	1	1	1	0.996925	0.922057	1	0.916589	0.960959	0.794093	1	1	1	1	1	0	0.229068	0.0720762	2.42188
		KAZ	5	Age11-19	1	1	1	0.784405	0.667217	1	1	1	1	1	1	1	1	1	1	1	1	1	1	0.00558747	0.848178	0.52843	1.59603
		KEN	4	Age11-19	0.845311	1	0.860482	1	1	1	1	1	1	1	1	1	1	1	1	1	1	1	1	0	0	0	0.0830598
		KGZ	5	Age11-19	1	1	1	0.69594	0.709081	1	1	1	1	0.965279	1	1	1	1	1	1	1	1	1	0	0.232294	0	0.973053
		KOR	3	Age11-19	0.857031	1	1	0.916835	1	1	1	1	1	1	1	1	1	1	1	1	1	1	1	0	0.511361	0.291891	2.71915
		KWT	5	Age11-19	0.665185	1	1	1	1	1	1	1	1	1	1	1	1	1	1	1	1	1	1	0.113022	0.746384	0.701329	1.9448
		LAO	6	Age11-19	0.495944	1	0.55877	0.589259	0.694333	1	1	1	0.81931	0.71943	1	0.78648	1	0.338435	1	1	0.818868	1	1	0	0	0	0
		LCA	7	Age11-19	0.31939	1	0.811299	0.695727	0.806274	1	1	1	0.886906	0.910358	1	0.918271	1	0.410516	1	1	1	1	1	0	0.521301	0.118403	2.54184
		LKA	6	Age11-19	0.545486	1	0.314456	0.60499	0.397812	1	1	1	1	0.705962	1	0.693255	1	0.287096	1	1	1	1	1	0	0.694306	0	0.961426
		LTU	1	Age11-19	1	1	1	0.833292	0.767379	1	1	1	1	1	1	1	1	1	1	1	1	1	1	0.1904	1.64375	0.835195	3.65516
		LUX	1	Age11-19	1	1	1	0.596574	0.612797	0.912141	1	1	1	0.943501	1	1	1	1	1	1	1	1	1	0.0438545	1.07078	0.533264	2.54005
		LVA	1	Age11-19	1	1	1	0.783398	0.632294	1	1	1	1	1	1	1	1	1	1	1	1	1	1	0.312155	1.41148	0.897886	4.38737
		MAR	5	Age11-19	0.731007	1	1	1	1	1	1	1	1	1	1	1	1	1	1	1	1	1	1	0	0	0	2.17544
		MDA	1	Age11-19	1	1	1	0.470945	0.577763	0.744439	1	0.969003	0.819286	0.693091	1	1	0.891732	0.678767	1	1	0.885272	1	1	0	0.266859	0.168707	2.07892
		MDG	4	Age11-19	0.679538	1	0.466879	0.91731	0.986083	1	1	1	1	1	1	0.996815	1	0.534109	1	1	1	1	1	0	0	0	0
		MDV	6	Age11-19	0.427331	1	0.861537	1	0.676967	1	1	1	1	1	1	1	1	0.622208	1	1	1	1	1	0	0	0	1.21219
		MEX	7	Age11-19	0.960675	1	1	1	1	1	1	1	1	1	1	1	1	1	1	1	1	1	1	0	0.191811	0.0155565	2.25906
		MKD	1	Age11-19	1	1	1	0.670936	0.878527	0.979803	1	0.887358	0.913864	0.916194	1	1	0.997978	0.963625	1	1	1	1	1	0	0.3608	0.289661	2.53969
		MLI	4	Age11-19	0.982239	1	1	1	1	1	1	1	1	1	1	1	1	1	1	1	1	1	1	0	0	0	0
		MLT	1	Age11-19	0.796109	1	1	0.648702	0.686116	1	1	1	0.910547	0.905573	1	1	1	0.587951	1	1	1	1	1	0	0.279384	0.169084	3.64311
		MNE	1	Age11-19	1	1	1	0.836088	0.841162	1	1	1	1	1	1	1	1	0.910001	1	1	1	1	1	0.0454826	0.960769	0.544193	3.66149
		MNG	5	Age11-19	1	1	0.968716	0.48802	0.503903	1	1	1	1	0.753919	1	1	1	1	0.952746	1	1	1	1	0	0.0137376	0	0.229025
		MOZ	4	Age11-19	0.822183	1	1	1	1	1	1	1	1	1	1	1	1	0.928596	1	1	1	1	1	0	0	0	0
		MRT	4	Age11-19	1	1	1	0.936917	0.873301	1	1	1	1	1	1	1	1	1	1	0.738924	1	1	1	0	0.227758	0	1.11883
		MUS	6	Age11-19	0.487994	1	1	1	0.942893	1	1	1	1	1	1	1	1	0.598087	1	1	1	1	1	0	0	0	0.540652
		MWI	4	Age11-19	0.565518	1	1	1	1	1	1	1	1	1	1	1	1	0.491241	1	1	1	1	1	0	0	0	0
		MYS	6	Age11-19	0.354661	1	1	0.503442	0.549652	1	1	1	0.8879	0.673005	1	0.912545	1	1	1	1	0.934959	1	1	0	0.654485	0.019334	2.7235
		NAM	4	Age11-19	0.690651	1	1	1	0.632336	1	1	1	1	1	1	1	1	0.644644	1	1	1	1	1	0	0	0.262087	0
		NER	4	Age11-19	1	1	1	1	1	1	1	1	1	1	1	1	1	0.973992	1	1	1	1	1	0	0	0	0
		NGA	4	Age11-19	0.828304	1	1	1	1	1	1	1	1	1	1	1	1	1	1	1	1	1	1	0	0	0	0
		NIC	7	Age11-19	1	1	1	1	1	1	1	1	1	1	1	1	1	1	1	1	1	1	1	0	0	0	1.81719
		NLD	1	Age11-19	1	1	1	0.599025	0.677296	0.941111	1	1	1	1	1	1	1	1	1	1	1	1	1	0.0945832	1.96713	0.849136	2.55663
		NOR	1	Age11-19	1	1	1	0.667075	0.557023	0.88431	1	0.907284	1	0.824695	1	1	0.990352	1	1	1	1	1	1	0.0785739	1.21257	0.657135	2.10579
		NPL	6	Age11-19	0.759888	1	1	1	1	1	1	1	1	1	1	0.94339	1	0.466818	1	1	1	1	1	0	0	0	0
		NZL	2	Age11-19	1	1	1	0.49262	0.617674	1	1	1	1	0.871257	1	1	0.955692	1	1	1	1	1	1	0.125674	1.7874	0.82116	3.17023
		PAK	6	Age11-19	1	1	1	1	0.928664	1	1	1	1	1	1	1	1	0.992844	1	1	1	1	1	0	0.56214	0	0.75677
		PAN	7	Age11-19	0.645617	1	1	0.85316	0.711654	1	1	1	1	1	1	1	1	0.496293	1	1	1	1	1	0	0.0176492	0	1.15197
		PER	7	Age11-19	0.799423	1	0.992653	1	1	1	1	1	1	1	1	1	1	1	1	1	1	1	1	0	0	0	0.548454
		PHL	6	Age11-19	0.325726	1	0.590476	0.595609	0.547551	1	1	1	0.793408	0.807771	1	0.86795	1	0.719977	1	1	0.808818	1	1	0	0.0352277	0	1.04071
		POL	1	Age11-19	1	1	1	0.905779	0.675159	1	1	1	1	1	1	1	1	1	1	1	1	1	1	0.24866	1.53245	0.817224	3.51899
		PRT	1	Age11-19	1	1	1	0.58675	0.629437	0.904375	1	1	1	0.879941	1	1	1	1	1	1	1	1	1	0.346943	1.04343	0.7997	1.2442
		PRY	7	Age11-19	0.951091	1	1	0.858754	1	1	1	1	1	1	1	1	1	0.868426	1	1	1	1	1	0	0.176086	0.0211506	0.707282
		PSE	5	Age11-19	1	1	1	1	1	1	1	1	1	1	1	1	1	1	1	1	1	1	1	0.370316	1.58079	1.05409	2.67048
		ROU	1	Age11-19	1	1	1	0.67268	0.77642	0.976974	1	1	1	1	1	1	1	1	1	1	1	1	1	0	0.764726	0.421234	1.4332
		RUS	1	Age11-19	1	1	1	0.684963	0.604378	1	1	1	1	0.974568	1	1	1	0.908371	1	1	1	1	1	0	0.600993	0.376808	4.16052
		RWA	4	Age11-19	0.741556	1	0.551786	1	1	1	1	1	1	1	1	1	1	1	1	1	1	1	1	0	0	0	0
		SAU	5	Age11-19	0.717056	1	1	1	0.777022	1	1	1	1	1	1	1	1	1	1	1	1	1	1	0	0.62613	0.380775	1.58322
		SDN	4	Age11-19	1	1	1	1	1	1	1	1	1	1	1	1	1	1	1	1	1	1	1	0	0	0	0.475374
		SEN	4	Age11-19	0.474986	1	1	1	0.914725	1	1	1	1	1	1	1	1	1	1	1	1	1	1	0	0	0	0
		SLV	7	Age11-19	0.891639	1	1	1	1	1	1	1	1	1	1	1	1	0.638154	1	1	1	1	1	0	0	0	1.67858
		SRB	1	Age11-19	1	1	1	0.718541	0.777026	0.842542	1	0.878858	0.870937	0.794021	1	0.893794	1	0.613638	1	1	1	1	1	0	0.132313	0	2.00479
		SUR	7	Age11-19	0.500108	1	1	0.714102	0.517264	1	1	1	0.934361	0.978498	1	0.936383	1	0.383408	1	1	1	1	1	0	0	0	2.3229
		SVK	1	Age11-19	0.945067	1	1	0.53011	0.530673	0.931618	1	0.868723	0.859779	0.737863	1	0.988035	1	0.85385	0.987153	1	1	1	1	0.131956	0.651523	0.487526	3.75098
		SVN	1	Age11-19	1	1	1	0.609413	0.610242	0.972013	1	1	1	0.855629	1	1	1	0.970318	1	1	1	1	1	0.0926516	1.06466	0.663633	1.70199
		SWE	1	Age11-19	1	1	1	0.555891	0.540509	0.806905	1	0.923921	1	0.800437	1	1	1	1	1	1	1	1	1	0.188844	1.80088	0.815075	2.19194
		SWZ	4	Age11-19	0.46767	1	0.986585	1	0.630494	1	1	1	1	1	1	1	1	0.384675	1	1	1	1	1	0	0	0	0.869726
		THA	6	Age11-19	0.497423	1	1	0.584259	0.623226	1	1	1	0.776567	0.75355	1	0.882558	1	1	1	1	0.789811	1	1	0	0	0	3.5171
		TJK	5	Age11-19	0.575372	1	1	0.655007	0.546798	0.780516	0.87923	0.745481	0.672561	0.684104	1	0.573823	0.794948	0.960605	0.71361	1	0.791144	1	1	0	0	0	0.543001
		TTO	7	Age11-19	0.302096	1	1	0.93722	0.920824	1	1	1	0.883996	0.969152	1	0.838794	1	0.385002	1	1	1	1	1	0	0.340746	0.20984	2.85986
		TUN	5	Age11-19	1	1	1	1	1	1	1	1	1	1	1	1	1	1	1	1	1	1	1	0	0.168421	0.147982	1.95998
		TUR	5	Age11-19	1	1	1	1	1	1	1	1	1	1	1	1	1	1	1	1	1	1	1	0.0328718	0.87199	0.664953	1.54496
		TZA	4	Age11-19	0.95306	1	1	1	1	1	1	1	1	1	1	1	1	1	1	1	1	1	1	0	0	0	0
		UKR	1	Age11-19	1	1	1	0.719691	0.652319	1	1	1	1	1	1	1	1	0.877576	1	1	1	1	1	0	0.368262	0.229686	3.86225
		URY	7	Age11-19	1	1	1	0.848242	0.835064	1	1	1	1	1	1	1	1	1	1	1	1	1	1	0	0.845557	0.11969	1.53213
		USA	2	Age11-19	1	1	1	0.458643	0.588215	0.920504	1	1	1	0.807513	1	1	0.987264	0.866483	1	1	1	1	1	0.282288	1.23215	1.11968	3.60954
		UZB	5	Age11-19	1	1	1	0.727738	0.631896	0.973869	1	0.939744	0.943196	0.905127	1	0.840139	0.947177	1	1	1	1	1	1	0	0.083939	0	0
		VCT	7	Age11-19	0.54021	1	1	1	0.852247	1	1	1	1	1	1	1	1	0.860033	1	1	1	1	1	0	0.496114	0.306829	1.99392
		ZAF	4	Age11-19	0.60201	1	1	1	0.861325	1	1	1	1	1	1	1	1	1	1	1	1	1	1	0	0.0198186	0	0.872046
		ZWE	4	Age11-19	0.401686	1	1	1	0.672835	1	1	1	1	0.89994	1	0.984632	1	0.558804	1	1	1	1	1	0	0	0	0.461495
		AGO	4	Age20-44	0.758741	1	1	1	1	1	1	1	1	1	1	1	1	1	1	1	1	1	1	0	0	0	0.0292985
		ALB	1	Age20-44	1	1	0.939627	0.82329	0.787227	1	1	0.902242	1	1	1	1	1	1	1	1	1	1	1	0	0.244303	0	1.36856
		ARE	5	Age20-44	0.517008	1	1	1	1	1	1	1	1	1	1	1	1	0.652195	1	1	1	1	1	0	0	0.201597	0.586492
		ARG	7	Age20-44	1	1	1	0.505957	0.473209	1	0.835892	1	1	0.932824	1	1	1	0.878184	1	1	1	1	1	0	0.125333	0	1.66455
		ARM	1	Age20-44	1	1	1	1	0.843906	1	1	1	1	1	1	1	1	1	1	1	1	1	1	0	0.114453	0	1.12085
		ATG	7	Age20-44	0.627392	1	1	0.65129	0.485012	0.903095	0.857561	1	1	0.808301	1	0.839241	0.828927	0.595149	1	1	1	0.795457	1	0	0	0	0.7148
		AUS	2	Age20-44	1	1	1	0.627875	0.552864	1	1	1	1	0.832137	1	1	0.960826	1	1	1	1	1	1	0.474609	1.37035	1.01558	1.91924
		AUT	1	Age20-44	1	1	1	0.776966	0.643209	0.9826	1	1	1	0.929383	1	1	1	1	1	1	1	1	1	0.592855	1.52302	1.17948	2.0469
		AZE	1	Age20-44	1	1	0.952458	1	0.826481	1	1	1	1	1	1	1	1	0.806067	1	1	1	1	1	0	0	0	0
		BEL	1	Age20-44	1	1	1	0.756905	0.79349	1	1	1	1	1	1	1	1	1	1	1	1	1	1	0.383648	1.6108	1.0609	2.333
		BEN	4	Age20-44	0.672426	1	1	1	1	1	1	1	1	1	1	0.857602	1	0.983888	1	1	1	1	1	0	0	0	0
		BFA	4	Age20-44	0.430504	1	1	1	1	1	1	1	1	0.944213	1	0.869532	1	1	1	0.786276	1	1	1	0	0	0	0
		BGD	6	Age20-44	0.42641	1	0.536252	0.48006	0.415496	1	1	1	1	0.442151	1	0.581103	1	0.97219	1	1	0.921059	1	1	0	0	0	0
		BGR	1	Age20-44	0.847453	1	1	0.525321	0.53064	0.748354	0.963077	0.887476	1	0.600551	1	0.846175	0.91462	0.768627	0.91035	1	1	1	1	0	0.211304	0.171809	0.742688
		BHS	7	Age20-44	0.396681	1	1	0.652555	0.560496	0.795846	0.916912	1	1	0.861483	1	0.759544	0.892869	0.703229	1	1	1	0.937035	1	0	0.153312	0.0558928	1.37292
		BIH	1	Age20-44	0.974159	1	1	0.875232	0.891212	0.87687	1	0.984778	1	0.936863	1	0.819238	0.942113	1	1	1	1	1	1	0	0	0	0.16483
		BLR	1	Age20-44	1	1	1	1	0.762692	1	1	1	1	1	1	1	1	1	1	1	1	1	1	0.218363	0.803103	0.649091	1.16371
		BLZ	7	Age20-44	0.574459	1	1	0.956847	0.86309	1	1	1	1	0.84129	1	0.821659	1	0.446402	1	1	1	1	1	0	0	0	1.39346
		BOL	7	Age20-44	0.535655	1	1	0.683417	0.701939	1	1	1	1	0.961738	1	0.943243	1	0.356822	1	1	1	0.897302	1	0	0	0	0.463072
		BRA	7	Age20-44	1	1	1	0.89013	1	1	1	1	1	1	1	1	1	1	1	1	1	1	1	0	0.348378	0.0877188	1.4139
		BRB	7	Age20-44	0.423801	1	1	0.719822	0.614474	1	1	1	1	0.837595	1	0.752259	1	0.539934	1	1	1	1	1	0	0.119599	0.182028	2.0523
		BRN	6	Age20-44	0.397757	1	1	0.513935	0.541511	0.906862	1	1	1	0.551485	1	0.824656	0.952693	1	1	1	1	1	1	0	0.0448222	0	1.3978
		BWA	4	Age20-44	0.547013	1	1	0.692261	0.522997	1	1	1	1	0.771332	1	0.985324	1	0.600532	1	1	1	0.985435	1	0	0	0	0.858876
		CAF	4	Age20-44	0.74534	1	1	1	0.666493	1	1	0.987271	1	1	1	0.951813	1	0.67947	1	1	1	1	1	0	0	0	0
		CAN	2	Age20-44	1	1	1	0.78225	0.958817	1	1	1	1	0.92753	1	1	1	1	1	1	1	1	1	0.543468	0.975897	0.983396	2.07783
		CHE	1	Age20-44	1	1	1	0.630901	0.597401	0.866047	1	0.921392	1	0.785969	1	1	0.999784	1	1	1	1	1	1	0.211559	1.1392	0.715719	2.67992
		CHL	7	Age20-44	0.836107	1	1	0.644658	0.630775	1	1	1	1	0.903046	1	1	1	0.657973	1	1	1	1	1	0	0	0	1.70286
		CHN	3	Age20-44	0.856413	1	1	1	1	1	1	1	1	1	1	1	1	1	1	1	1	1	1	0	0	0	0
		CIV	4	Age20-44	0.549203	1	0.814623	1	0.915953	1	1	1	1	1	1	0.965012	1	1	1	1	1	1	1	0	0	0	0
		CMR	4	Age20-44	0.601425	1	1	1	1	1	1	1	1	1	1	0.838383	1	1	1	1	1	1	1	0	0	0	0
		COG	4	Age20-44	0.605597	1	0.656327	0.69716	0.706251	1	1	1	1	1	1	0.709414	0.906497	1	1	1	1	0.995788	1	0	0	0	0
		COL	7	Age20-44	0.812957	1	1	0.669468	0.658158	1	0.932323	0.888101	1	1	1	0.858591	0.90323	1	1	1	1	1	1	0	0.0101031	0	1.99013
		CPV	4	Age20-44	0.670847	1	1	0.914527	0.724325	1	1	1	1	1	1	0.928326	1	0.69955	1	1	1	1	1	0	0.0167923	0	0.383414
		CRI	7	Age20-44	1	1	1	0.893356	0.834432	1	1	0.982826	1	1	1	0.956648	1	1	1	1	1	1	1	0	0.302957	0	2.03824
		CYP	1	Age20-44	0.853546	1	1	0.546886	0.504944	0.801862	1	0.913267	1	0.698339	1	0.954675	0.974544	0.692134	0.941451	1	1	1	1	0.0408247	0.294231	0.365736	1.04318
		CZE	1	Age20-44	0.996114	1	1	0.655387	0.530089	1	1	0.973023	1	0.768152	1	0.95237	1	0.952677	1	1	1	1	1	0.490491	0.739211	0.796971	1.50744
		DEU	1	Age20-44	1	1	1	0.648478	0.58193	0.88459	1	1	1	0.834448	1	1	1	1	1	1	1	1	1	0.30175	1.31685	0.866951	2.14962
		DJI	4	Age20-44	0.360557	1	0.836018	0.632899	0.710503	1	1	0.75706	1	0.646676	1	0.647464	1	1	1	1	1	0.98392	1	0	0	0	0.950563
		DMA	7	Age20-44	0.938946	1	0.732183	1	0.758867	1	1	1	1	1	1	0.964504	1	0.844242	1	1	1	1	1	0	0.184199	0	1.41423
		DNK	1	Age20-44	1	1	1	0.897587	0.690756	1	1	1	1	1	1	1	1	1	1	1	1	1	1	0.173693	1.68121	0.827204	2.42349
		DOM	7	Age20-44	0.567299	1	1	0.837223	0.919732	0.935464	1	0.917852	1	1	1	0.784027	0.912427	1	1	1	1	0.981567	1	0	0.169131	0	0.74717
		DZA	5	Age20-44	0.787964	1	1	1	1	1	1	1	1	1	1	0.895131	1	1	1	1	1	1	1	0	0	0	0.324785
		ECU	7	Age20-44	0.969927	1	1	0.605344	0.496879	0.914563	0.898529	0.920037	1	0.923455	1	0.945816	0.8972	1	1	1	1	0.952742	1	0	0.440826	0	0.0443561
		EGY	5	Age20-44	0.839427	1	1	1	1	1	1	1	1	1	1	0.920132	1	0.795113	1	1	1	1	1	0	0	0	0.664928
		ESP	1	Age20-44	0.975187	1	1	0.748978	0.718415	1	1	1	1	0.933514	1	1	1	0.948639	1	1	1	1	1	0.642335	0.747121	0.948586	0.561165
		EST	1	Age20-44	1	1	1	1	0.740908	1	1	1	1	1	1	1	1	1	1	1	1	1	1	0	0.630981	0.149136	1.38468
		ETH	4	Age20-44	0.646179	1	0.581963	0.983133	0.783311	1	1	0.857045	1	0.819732	1	0.777925	1	0.821462	1	1	1	0.909167	1	0	0	0	0
		FIN	1	Age20-44	1	1	1	0.740389	0.542148	0.867545	1	1	1	0.840263	1	1	1	1	1	1	1	1	1	0.010822	0.966184	0.426096	1.03712
		FJI	2	Age20-44	0.402763	1	1	1	0.594701	0.997115	1	1	1	0.865008	1	0.586409	1	0.610959	1	1	1	1	1	0	1.04101	0.144337	0.939258
		FRA	1	Age20-44	1	1	1	0.685439	0.66611	1	1	1	1	0.921411	1	1	1	1	1	1	1	1	1	0.219463	1.41177	0.849521	1.45529
		GBR	1	Age20-44	1	1	1	0.744792	0.614792	1	1	1	1	0.92127	1	0.967649	1	1	1	1	1	1	1	0.0871251	0.53849	0.456456	1.56991
		GEO	1	Age20-44	0.860039	1	1	1	0.576068	1	1	1	1	0.85264	1	0.974438	1	0.46173	1	1	1	1	1	0	0	0	0.746737
		GHA	4	Age20-44	0.781821	1	0.867765	1	1	1	1	1	1	1	1	1	1	1	1	1	1	1	1	0	0	0	0
		GIN	4	Age20-44	0.498402	1	0.964974	0.758259	0.578165	1	1	0.900049	1	0.906621	0.878451	0.614902	0.778326	1	1	1	1	1	1	0	0	0	0
		GMB	4	Age20-44	0.357617	1	1	0.725913	0.44753	1	1	1	1	0.592219	1	0.588293	0.976811	1	1	0.827313	1	1	1	0	0	0	0.85196
		GNB	4	Age20-44	0.392135	1	1	0.525929	0.45344	1	1	0.769034	1	0.657672	0.830034	0.588553	0.908667	1	1	1	1	0.968878	1	0	0	0	0
		GRC	1	Age20-44	1	1	1	0.845709	0.859476	1	1	1	1	1	1	1	1	1	1	1	1	1	1	0.428187	0.997862	0.843824	0.766014
		GRD	7	Age20-44	0.349237	1	1	0.848891	0.743689	0.917691	1	0.932661	1	0.793795	1	0.684791	0.801045	0.400181	1	1	1	0.957681	1	0	0.319674	0	1.27432
		GUY	7	Age20-44	0.599641	1	0.428607	0.816382	0.590153	0.979126	0.940941	1	1	0.873535	1	0.727325	0.881747	0.40597	1	1	1	0.984867	1	0	0.0557998	0	1.32163
		HND	7	Age20-44	0.745041	1	0.970668	0.95701	0.689995	1	1	0.966001	1	0.801163	1	0.820856	1	1	1	1	1	1	1	0	0	0	1.45961
		HRV	1	Age20-44	1	1	1	0.587174	0.46654	0.772908	1	0.793472	1	0.723486	1	0.887936	0.988618	1	0.986861	1	1	1	1	0	0.479858	0.256783	2.14908
		HTI	7	Age20-44	0.395945	1	1	0.844369	1	0.934021	1	0.705248	1	1	0.893199	0.545595	0.970527	1	1	1	1	0.784612	1	0	0	0	0.0104132
		HUN	1	Age20-44	0.835461	1	1	0.590854	0.466841	0.759795	0.951905	0.798988	1	0.695959	1	0.798695	0.962387	1	0.957202	1	1	1	1	0.277985	0.905731	0.742136	0.867152
		IDN	6	Age20-44	0.38845	1	0.738266	0.628758	0.616213	1	1	1	1	0.589471	1	0.656444	1	1	1	1	0.975407	1	1	0	0.0660055	0	0
		IND	6	Age20-44	1	1	1	0.595772	0.846587	1	1	1	1	0.754865	1	0.930411	1	0.866843	1	1	1	1	1	0	0	0	0.110508
		IRL	1	Age20-44	1	1	1	0.850817	0.820269	1	1	1	1	1	1	1	1	1	1	1	1	1	1	0.210015	1.75771	0.883207	2.03246
		IRN	6	Age20-44	0.961276	1	1	1	1	1	1	1	1	1	1	1	1	1	1	1	1	1	1	0	0	0	0.419724
		IRQ	5	Age20-44	0.459708	1	1	1	0.857198	1	1	1	1	0.975526	1	0.970743	1	1	1	1	1	1	1	0	0	0	0
		ISL	1	Age20-44	1	1	1	0.613606	0.503332	0.937855	1	1	1	0.905564	1	1	0.934831	1	1	1	1	1	1	0	0.834189	0.338918	1.95751
		ISR	5	Age20-44	1	1	1	1	1	1	1	1	1	1	1	1	1	1	1	1	1	1	1	0.430805	0.827077	0.970169	0.722043
		ITA	1	Age20-44	1	1	1	0.849807	0.801845	1	1	1	1	1	1	1	1	1	1	1	1	1	1	0.441504	0.972092	0.882001	0.906162
		JAM	7	Age20-44	0.63554	1	1	0.776378	0.689419	0.904203	1	1	1	1	1	0.802311	0.940221	1	1	1	1	1	1	0	0.326267	0	1.68968
		JOR	5	Age20-44	0.697996	1	1	1	1	1	1	1	1	1	1	1	1	1	1	1	1	1	1	0	0.210487	0.23916	0.94869
		JPN	3	Age20-44	0.664044	1	1	0.558815	0.6699	1	1	1	1	0.732397	1	0.684578	0.781009	0.777829	1	1	1	0.956908	1	0	0	0	0.753084
		KAZ	5	Age20-44	1	1	1	0.941709	0.713245	1	1	1	1	1	1	1	1	1	1	1	1	1	1	0	0.47932	0.338617	0.570716
		KEN	4	Age20-44	0.694689	1	0.711014	1	1	1	1	0.856174	1	1	1	1	1	1	1	1	1	0.939129	1	0	0	0	0.264928
		KGZ	5	Age20-44	1	1	1	0.791582	0.69789	0.931099	1	1	1	0.961319	1	0.8638	0.939531	1	1	1	1	1	1	0	0	0	0.231432
		KOR	3	Age20-44	0.821525	1	1	0.879516	1	1	1	1	1	1	1	0.8925	1	1	1	1	1	1	1	0	0.255797	0.13078	0.924267
		KWT	5	Age20-44	0.699596	1	1	1	1	1	1	1	1	1	1	1	1	1	1	1	1	1	1	0	0.399212	0.431289	0.679168
		LAO	6	Age20-44	0.501387	1	0.532297	0.552998	0.626028	1	1	1	1	0.606301	1	0.65945	1	0.376552	1	1	0.986613	1	1	0	0	0	0
		LCA	7	Age20-44	0.266798	1	0.616187	0.542871	0.58536	0.834981	0.808955	0.969267	1	0.648318	1	0.656539	0.824744	0.387767	1	1	1	0.983258	1	0	0.208335	0	1.86925
		LKA	6	Age20-44	0.531381	1	0.289349	0.565505	0.344726	1	1	1	1	0.56131	1	0.575964	0.940643	0.297856	1	1	1	1	1	0	0.45721	0	0.448345
		LTU	1	Age20-44	1	1	1	0.89993	0.777381	0.993639	1	1	1	1	1	1	1	1	1	1	1	1	1	0.0969363	1.34092	0.672896	1.70132
		LUX	1	Age20-44	1	1	1	0.874787	0.688888	1	1	1	1	1	1	1	1	1	1	1	1	1	1	0.0473727	0.832089	0.471443	1.88688
		LVA	1	Age20-44	1	1	1	0.92219	0.649668	1	1	1	1	0.975617	1	1	1	1	1	1	1	1	1	0.183956	0.91813	0.655041	2.14082
		MAR	5	Age20-44	0.679751	1	1	1	0.981598	1	1	1	1	1	1	0.952063	1	1	1	1	1	1	1	0	0	0	0.902598
		MDA	1	Age20-44	0.859556	1	1	0.532063	0.548565	0.680978	0.969675	0.900771	1	0.674905	1	0.833666	0.820498	0.774883	1	1	1	1	1	0	0.0500193	0.0499611	0.85403
		MDG	4	Age20-44	0.502481	1	0.381495	0.639382	0.639496	0.922475	1	0.81588	1	0.855962	0.804971	0.635197	0.71934	0.546392	1	1	1	0.850679	1	0	0	0	0
		MDV	6	Age20-44	0.442977	1	0.80948	1	0.617853	1	1	1	1	1	1	1	1	0.674423	1	1	1	1	1	0	0	0	0.720533
		MEX	7	Age20-44	0.761647	1	1	1	0.786149	1	1	1	1	0.997102	1	1	1	1	1	1	1	1	1	0	0	0	1.67329
		MKD	1	Age20-44	0.95521	1	1	0.800979	0.88076	0.921194	1	0.88365	1	0.938761	1	0.929288	0.950451	1	1	1	1	1	1	0	0.0933451	0.148594	1.08148
		MLI	4	Age20-44	0.758458	1	1	1	0.818188	1	1	1	1	1	1	1	1	1	1	1	1	1	1	0	0	0	0
		MLT	1	Age20-44	0.781187	1	1	0.855023	0.82219	1	1	1	1	1	1	1	1	0.783524	1	1	1	1	1	0	0.283379	0.208877	2.86414
		MNE	1	Age20-44	1	1	1	1	0.910105	0.966627	1	1	1	1	1	1	1	0.981583	1	1	1	1	1	0	0.561731	0.334305	1.7289
		MNG	5	Age20-44	1	1	0.919284	0.53348	0.478811	1	1	1	1	0.670616	1	0.912226	1	1	0.86488	1	1	0.907384	1	0	0	0	0
		MOZ	4	Age20-44	0.638523	1	0.997738	1	0.91186	1	1	0.827859	1	1	1	0.661212	1	0.977374	1	1	1	1	1	0	0	0	0
		MRT	4	Age20-44	0.777825	1	1	0.62438	0.556704	1	1	0.864946	1	0.716887	1	1	1	1	1	0.594198	1	1	1	0	0.0544489	0	1.46834
		MUS	6	Age20-44	0.387085	1	1	0.699952	0.620328	1	1	1	1	0.762117	1	0.751568	1	0.63333	1	1	1	1	1	0	0	0	0.770664
		MWI	4	Age20-44	0.468544	1	1	1	1	1	1	1	1	1	1	0.909528	1	0.487456	1	1	1	1	1	0	0	0	0
		MYS	6	Age20-44	0.360772	1	1	0.467951	0.478543	0.930944	0.977041	1	1	0.564794	1	0.757253	1	1	1	1	1	1	1	0	0.464615	0	1.10599
		NAM	4	Age20-44	0.552729	1	0.918594	0.819841	0.425392	1	1	1	1	0.878177	1	0.965911	1	0.661364	1	1	1	1	1	0	0	0	0.0698585
		NER	4	Age20-44	0.951019	1	1	1	1	1	1	1	1	1	1	1	1	1	1	1	1	1	1	0	0	0	0
		NGA	4	Age20-44	0.67129	1	1	1	1	1	1	1	1	1	1	0.927208	1	1	1	1	1	1	1	0	0	0	0
		NIC	7	Age20-44	0.83577	1	1	1	0.960384	1	1	0.962742	1	0.841293	1	0.795449	1	1	1	1	1	1	1	0	0	0	1.3053
		NLD	1	Age20-44	1	1	1	0.754861	0.725479	0.970487	1	1	1	1	1	1	1	1	1	1	1	1	1	0.0103251	1.42636	0.635331	1.90839
		NOR	1	Age20-44	1	1	1	0.871062	0.623647	0.962293	1	1	1	0.886903	1	1	1	1	1	1	1	1	1	0.0555527	0.907073	0.557522	1.54468
		NPL	6	Age20-44	0.725002	1	1	1	1	1	1	1	1	1	1	0.79862	1	0.480412	1	1	1	1	1	0	0	0	0
		NZL	2	Age20-44	1	1	1	0.63297	0.710085	1	1	1	1	0.931978	1	1	1	1	1	1	1	1	1	0.0976545	1.38781	0.697749	2.44446
		PAK	6	Age20-44	1	1	1	1	0.820048	1	1	1	1	0.896951	1	0.917363	1	0.918633	1	1	1	1	1	0	0.275182	0	0.346956
		PAN	7	Age20-44	0.504459	1	1	0.687394	0.531428	1	1	1	1	0.884652	1	1	1	0.449575	1	1	1	1	1	0	0	0	0.761334
		PER	7	Age20-44	0.639341	1	0.869333	0.904786	0.844558	1	1	1	1	1	1	0.918042	1	1	1	1	1	0.915917	1	0	0	0	0.278588
		PHL	6	Age20-44	0.323361	1	0.536759	0.546267	0.467042	0.910515	1	1	1	0.659195	1	0.712808	1	0.762935	1	1	0.974786	1	1	0	0	0	0.147084
		POL	1	Age20-44	1	1	1	1	0.696057	1	1	1	1	1	1	1	1	1	1	1	1	1	1	0.124574	1.06472	0.585581	1.64746
		PRT	1	Age20-44	1	1	1	0.783317	0.755672	0.990038	1	1	1	0.982751	1	1	1	1	1	1	1	1	1	0.352326	0.890797	0.764615	0.821188
		PRY	7	Age20-44	0.761045	1	1	0.674785	0.878949	1	1	0.920687	1	1	1	0.95167	1	0.808454	1	1	1	1	1	0	0	0	0.423114
		PSE	5	Age20-44	1	1	1	1	1	1	1	1	1	1	1	1	1	1	1	1	1	1	1	0.144179	0.945501	0.706366	1.28003
		ROU	1	Age20-44	1	1	1	0.781783	0.77818	0.89042	1	1	1	0.987059	1	1	1	1	1	1	1	1	1	0	0.39028	0.226785	0.384937
		RUS	1	Age20-44	1	1	1	0.763409	0.597644	0.945541	1	1	1	0.92962	1	0.960856	1	1	1	1	1	1	1	0	0.310775	0.21905	2.05793
		RWA	4	Age20-44	0.621045	1	0.45397	1	1	1	1	0.944713	1	1	1	0.91454	1	1	1	1	1	0.926435	1	0	0	0	0
		SAU	5	Age20-44	0.660971	1	1	1	0.753051	1	1	1	1	1	1	1	1	1	1	1	1	1	1	0	0.327627	0.177599	0.485614
		SDN	4	Age20-44	1	1	0.903327	0.859396	0.717816	1	1	0.838032	1	0.993498	1	1	1	1	1	1	1	0.961955	1	0	0	0	0.717755
		SEN	4	Age20-44	0.37974	1	1	0.753138	0.596164	1	1	1	1	0.68966	1	0.645666	1	1	1	1	1	1	1	0	0	0	0.0911971
		SLV	7	Age20-44	0.73655	1	1	1	0.90677	1	1	0.959734	1	0.863542	1	0.784481	1	0.604939	1	1	1	0.989448	1	0	0	0	1.22422
		SRB	1	Age20-44	0.873895	1	1	0.755763	0.720022	0.729223	1	0.811887	1	0.735712	1	0.732245	0.987449	0.664832	0.98912	1	1	0.970133	1	0	0	0	0.727704
		SUR	7	Age20-44	0.434805	1	1	0.558792	0.391927	0.796196	0.788572	1	1	0.687565	1	0.657593	0.735134	0.378144	1	1	1	1	1	0	0	0	1.7301
		SVK	1	Age20-44	0.788361	1	1	0.590396	0.526132	0.828661	0.971735	0.828748	1	0.699328	1	0.833486	0.972857	1	0.980623	1	1	1	1	0.0691108	0.39621	0.362596	1.76455
		SVN	1	Age20-44	1	1	1	0.740918	0.597956	0.927745	1	1	1	0.830498	1	0.996599	1	0.951424	1	1	1	1	1	0	0.680758	0.458991	0.540969
		SWE	1	Age20-44	1	1	1	0.70747	0.593715	0.853176	1	1	1	0.837446	1	1	1	1	1	1	1	1	1	0.142713	1.37883	0.664886	1.62024
		SWZ	4	Age20-44	0.38914	1	0.853467	0.870221	0.447396	1	1	0.837448	1	0.7073	0.998993	0.745066	1	0.382098	1	1	1	0.997604	1	0	0	0	1.1698
		THA	6	Age20-44	0.446776	1	0.951197	0.514132	0.518205	0.92078	0.965908	1	1	0.597216	1	0.691856	1	1	1	1	0.920818	1	1	0	0	0	1.39369
		TJK	5	Age20-44	0.564173	1	1	0.751147	0.56338	0.736087	0.940816	0.723563	1	0.725573	1	0.531401	0.755952	1	0.776729	1	1	0.884675	1	0	0	0	0
		TTO	7	Age20-44	0.264588	1	1	0.755784	0.678935	0.918139	0.958271	0.982592	1	0.70957	1	0.604892	0.839665	0.372965	1	1	1	1	1	0	0.0889188	0.00221148	2.18013
		TUN	5	Age20-44	0.903088	1	1	1	1	1	1	1	1	1	1	0.974574	1	1	1	1	1	1	1	0	0	0.00653817	0.769194
		TUR	5	Age20-44	1	1	1	1	1	1	1	1	1	1	1	1	1	1	1	1	1	1	1	0	0.503859	0.48202	0.497619
		TZA	4	Age20-44	0.830936	1	1	1	1	1	1	1	1	1	1	0.964128	1	1	1	1	1	0.987161	1	0	0	0	0
		UKR	1	Age20-44	1	1	1	0.808389	0.67069	0.915208	1	0.993076	1	1	1	0.951126	1	1	1	1	1	1	1	0	0.113852	0.0927743	1.85691
		URY	7	Age20-44	1	1	1	0.670249	0.58881	1	1	1	1	1	1	1	1	0.925818	1	1	1	1	1	0	0.24876	0	1.06499
		USA	2	Age20-44	1	1	1	0.60746	0.662708	0.994248	1	1	1	0.855098	1	1	1	0.920824	1	1	1	1	1	0.32371	1.09076	1.10432	2.81782
		UZB	5	Age20-44	0.965914	1	1	0.834351	0.674744	0.903093	1	0.926823	1	0.988539	1	0.76597	0.922637	1	1	1	1	1	1	0	0	0	0
		VCT	7	Age20-44	0.475422	1	1	0.851262	0.64358	1	1	1	1	1	1	0.841396	1	0.845615	1	1	1	1	1	0	0.179696	0.0343136	1.4444
		ZAF	4	Age20-44	0.491951	1	1	1	0.619824	1	1	1	1	0.894775	1	1	1	1	1	1	1	1	1	0	0	0	1.14458
		ZWE	4	Age20-44	0.330437	1	1	1	0.480506	1	1	0.878001	1	0.623542	1	0.686891	1	0.576048	0.986332	0.887246	1	1	1	0	0	0	0.70402
		AGO	4	Age45-59	0.639981	1	1	1	1	1	1	1	1	1	1	0.926053	1	1	1	1	1	1	1	0	0	0	0
		ALB	1	Age45-59	1	1	0.975834	0.965449	0.818207	1	1	0.859323	1	1	1	1	1	1	1	1	1	1	1	0	0.207859	0	0.347814
		ARE	5	Age45-59	0.488578	1	1	1	1	1	1	1	1	1	1	1	1	0.625569	1	1	1	1	1	0	0	0.234966	0.0695593
		ARG	7	Age45-59	1	1	1	0.522377	0.426926	1	0.759364	1	1	0.841853	1	1	0.942126	0.826701	0.912863	1	1	1	1	0	0.147435	0	0.980953
		ARM	1	Age45-59	1	1	1	1	0.941969	1	1	1	1	1	1	1	1	1	1	1	1	1	1	0	0.098435	0	0.131095
		ATG	7	Age45-59	0.544831	1	1	0.688613	0.449448	1	0.803526	1	1	0.748736	1	0.762788	0.752588	0.57021	0.937483	1	1	0.759517	1	0	0	0	0.306945
		AUS	2	Age45-59	1	1	1	0.835375	0.589469	1	1	1	1	0.902759	1	1	0.981353	1	1	1	1	1	1	0.609293	1.54065	1.1887	0.882305
		AUT	1	Age45-59	1	1	1	0.98611	0.689635	1	1	1	1	1	1	1	1	1	1	1	1	1	1	0.730214	1.68052	1.35586	1.01436
		AZE	1	Age45-59	0.958315	1	1	1	0.900866	1	1	1	1	1	1	1	1	0.795131	1	1	1	1	1	0	0	0	0
		BEL	1	Age45-59	1	1	1	0.926037	0.8583	1	1	1	1	1	1	1	1	1	1	1	1	1	1	0.498144	1.78314	1.22487	1.17655
		BEN	4	Age45-59	0.562554	1	1	1	0.929498	1	1	1	1	1	1	0.740036	1	0.984794	1	1	1	1	1	0	0	0	0
		BFA	4	Age45-59	0.395131	1	1	1	0.924201	1	1	1	1	0.845483	1	0.778422	1	1	1	0.708176	1	1	1	0	0	0	0
		BGD	6	Age45-59	0.397042	1	0.584749	0.527829	0.395154	1	1	1	1	0.424768	1	0.564381	1	1	0.892153	1	0.93414	1	1	0	0	0	0
		BGR	1	Age45-59	0.766917	1	1	0.612416	0.517503	0.892625	0.964061	0.81743	1	0.590175	1	0.776374	0.841561	0.736613	0.770954	1	1	1	1	0	0.192079	0.175082	0
		BHS	7	Age45-59	0.355878	1	1	0.696216	0.527997	0.907701	0.854085	0.954782	1	0.804146	1	0.69167	0.813468	0.654955	1	1	1	0.888317	1	0	0.150326	0.0602033	0.808498
		BIH	1	Age45-59	0.903791	1	1	1	0.906839	1	1	0.96141	1	0.968324	1	0.800868	0.932671	1	1	1	1	1	1	0	0	0	0
		BLR	1	Age45-59	1	1	1	1	0.798756	1	1	1	1	1	1	1	1	1	1	1	1	1	1	0.181584	0.756462	0.621342	0.192917
		BLZ	7	Age45-59	0.480244	1	1	0.979605	0.761404	1	1	0.921487	1	0.761293	1	0.731794	1	0.424279	1	1	1	0.980968	1	0	0	0	0.783199
		BOL	7	Age45-59	0.447703	1	1	0.694967	0.623409	1	0.961286	0.974966	1	0.851251	1	0.82569	0.911836	0.330059	0.972784	1	1	0.832391	1	0	0	0	0.085795
		BRA	7	Age45-59	0.900558	1	1	0.899109	0.991683	1	1	1	1	1	1	0.96129	1	1	1	1	1	1	1	0	0.398873	0.137475	0.809756
		BRB	7	Age45-59	0.380514	1	1	0.751274	0.564089	1	1	1	1	0.775667	1	0.685525	0.913544	0.512351	1	1	1	1	1	0	0.142079	0.21586	1.31445
		BRN	6	Age45-59	0.353263	1	1	0.595672	0.529341	1	1	1	1	0.517874	1	0.719717	0.885866	1	0.904815	1	1	1	1	0	0	0	0.205039
		BWA	4	Age45-59	0.523696	1	1	0.686967	0.480112	1	1	0.902799	1	0.699748	1	0.913589	1	0.584103	0.943	1	1	0.945595	1	0	0	0	0.650176
		CAF	4	Age45-59	0.637066	1	1	1	0.560533	1	1	0.853579	1	1	1	0.831327	1	0.659757	1	1	1	0.967201	1	0	0	0	0
		CAN	2	Age45-59	1	1	1	0.969607	1	1	1	1	1	0.992495	1	1	1	1	1	1	1	1	1	0.691602	1.10809	1.16094	0.990129
		CHE	1	Age45-59	1	1	1	0.793945	0.643757	1	1	0.943514	1	0.849995	1	1	1	1	0.991271	1	1	1	1	0.313142	1.2662	0.848644	1.43243
		CHL	7	Age45-59	0.712603	1	1	0.666464	0.567788	1	0.923214	1	1	0.81926	1	0.992104	1	0.62756	0.926775	1	1	1	1	0	0	0	1.03335
		CHN	3	Age45-59	0.787844	1	1	1	1	1	1	1	1	1	1	1	1	1	1	1	1	1	1	0	0	0	0
		CIV	4	Age45-59	0.444298	1	0.853206	1	0.778403	1	1	1	1	1	1	0.822079	1	1	1	1	1	1	1	0	0.0306399	0	0
		CMR	4	Age45-59	0.515888	1	1	1	1	1	1	1	1	1	1	0.740652	1	1	1	1	1	1	1	0	0	0	0
		COG	4	Age45-59	0.486822	1	0.682705	0.662956	0.6043	1	1	1	1	0.905161	0.977891	0.605896	0.779487	1	1	1	1	0.928021	1	0	0	0	0
		COL	7	Age45-59	0.678839	1	1	0.687205	0.584809	1	0.853136	0.776554	1	1	0.999957	0.751404	0.798165	1	0.909415	1	1	0.96891	1	0	0.0673074	0	1.23989
		CPV	4	Age45-59	0.640697	1	1	0.923071	0.662567	1	1	0.965769	1	0.957193	1	0.873147	1	0.663442	1	1	1	0.993847	1	0	0.0671574	0	0.194793
		CRI	7	Age45-59	0.994342	1	1	0.922083	0.737189	1	1	0.87239	1	0.926247	1	0.853484	0.954448	1	0.986559	1	1	1	1	0	0.363663	0	1.27972
		CYP	1	Age45-59	0.799891	1	1	0.738477	0.548885	1	1	0.945812	1	0.774432	1	0.971754	0.995882	0.734887	0.894849	1	1	1	1	0.139566	0.392582	0.490538	0.300887
		CZE	1	Age45-59	0.905749	1	1	0.779512	0.527362	1	1	0.888179	1	0.751286	1	0.875156	1	0.935509	0.917843	1	1	1	1	0.411563	0.688508	0.724895	0.431442
		DEU	1	Age45-59	1	1	1	0.830059	0.618212	1	1	1	1	0.893757	1	1	1	1	1	1	1	1	1	0.409496	1.45621	1.011	1.07159
		DJI	4	Age45-59	0.328883	1	0.896171	0.639093	0.666125	1	1	0.672335	1	0.600081	0.91362	0.58615	1	1	0.827853	1	1	0.945676	1	0	0	0	0.716929
		DMA	7	Age45-59	0.814652	1	0.761607	1	0.699452	1	1	1	1	1	1	0.873538	1	0.809561	1	1	1	0.949178	1	0	0.267696	0	0.826983
		DNK	1	Age45-59	1	1	1	1	0.740294	1	1	1	1	1	1	1	1	1	1	1	1	1	1	0.283821	1.87564	0.995104	1.24979
		DOM	7	Age45-59	0.477828	1	1	0.854472	0.822987	1	1	0.802151	1	0.975326	0.958445	0.697323	0.805059	1	1	1	1	0.933189	1	0	0.238385	0	0.294284
		DZA	5	Age45-59	0.688639	1	1	1	0.938007	1	1	1	1	1	1	0.842504	1	1	1	1	1	1	1	0	0	0	0
		ECU	7	Age45-59	0.836292	1	1	0.623497	0.450652	1	0.823792	0.801869	1	0.841372	1	0.838257	0.794951	1	1	1	1	0.9261	1	0	0.508162	0	0
		EGY	5	Age45-59	0.710946	1	1	1	0.961132	1	1	1	1	1	1	0.821757	1	0.750853	1	1	1	1	1	0	0	0	0.108964
		ESP	1	Age45-59	0.933489	1	1	0.957146	0.766066	1	1	1	1	1	1	1	1	0.985271	1	1	1	1	1	0.79126	0.884533	1.12211	0.039693
		EST	1	Age45-59	1	1	1	1	0.744498	1	1	1	1	1	1	1	1	1	1	1	1	1	1	0	0.614471	0.136789	0.321058
		ETH	4	Age45-59	0.618159	1	0.618545	1	0.736093	1	1	0.793854	1	0.762835	1	0.73192	1	0.841513	1	1	1	0.902038	1	0	0	0	0
		FIN	1	Age45-59	1	1	1	0.957473	0.582341	1	1	1	1	0.917672	1	1	1	1	1	1	1	1	1	0.0895325	1.05487	0.523397	0.305422
		FJI	2	Age45-59	0.350571	1	1	1	0.574216	1	1	0.969709	1	0.810867	1	0.516982	0.948173	0.538891	0.877614	1	1	1	1	0	1.05671	0.130422	0
		FRA	1	Age45-59	1	1	1	0.916576	0.71113	1	1	1	1	1	1	1	1	1	1	1	1	1	1	0.320185	1.56667	0.994329	0.592649
		GBR	1	Age45-59	1	1	1	0.971457	0.66123	1	1	1	1	1	1	0.993779	1	1	1	1	1	1	1	0.189371	0.652629	0.587409	0.677962
		GEO	1	Age45-59	0.808818	1	1	1	0.624206	1	1	1	1	0.912087	1	1	1	0.462746	1	1	1	1	1	0	0	0	0
		GHA	4	Age45-59	0.624527	1	0.887601	1	0.985433	1	1	1	1	1	1	0.923666	1	1	1	1	1	1	1	0	0	0	0
		GIN	4	Age45-59	0.421353	1	1	0.736267	0.492977	1	1	0.76761	1	0.780975	0.755635	0.536895	0.675677	1	0.921956	1	0.989007	0.963992	1	0	0	0	0
		GMB	4	Age45-59	0.310242	1	1	0.701767	0.381272	1	1	0.874084	1	0.512787	0.914278	0.503904	0.841416	1	0.939121	0.750021	1	1	1	0	0	0	0.612479
		GNB	4	Age45-59	0.343466	1	1	0.513048	0.395359	1	1	0.656585	1	0.572311	0.716832	0.519864	0.784778	1	0.831857	1	1	0.914187	1	0	0	0	0
		GRC	1	Age45-59	1	1	1	1	0.924019	1	1	1	1	1	1	1	1	1	1	1	1	1	1	0.552673	1.12066	0.992313	0.157142
		GRD	7	Age45-59	0.305452	1	1	0.891907	0.655656	1	1	0.831838	1	0.723813	1	0.611431	0.704116	0.3724	0.842349	1	1	0.890807	1	0	0.348237	0.0103162	0.685725
		GUY	7	Age45-59	0.503041	1	0.42716	0.830969	0.528915	1	0.857858	0.931176	1	0.782231	1	0.643507	0.787698	0.388565	0.893808	1	1	0.906053	1	0	0.108079	0	0.744841
		HND	7	Age45-59	0.620678	1	1	1	0.611685	1	1	0.874947	1	0.730577	1	0.741022	1	1	1	1	1	1	1	0	0.0448926	0	0.810792
		HRV	1	Age45-59	0.995851	1	1	0.696643	0.473344	0.968507	1	0.783289	1	0.727988	1	0.855579	0.962313	1	0.885869	1	1	1	1	0	0.548846	0.325268	0.779239
		HTI	7	Age45-59	0.322921	1	1	0.821549	0.901399	1	0.984293	0.60516	1	0.927422	0.761365	0.469254	0.829892	1	0.903293	1	1	0.731822	1	0	0	0	0
		HUN	1	Age45-59	0.761519	1	1	0.699055	0.46738	0.928299	0.952104	0.734397	1	0.68119	1	0.73979	0.872998	1	0.806109	1	1	1	1	0.288169	0.921849	0.76916	0.0618923
		IDN	6	Age45-59	0.355019	1	0.795245	0.717454	0.604199	1	1	1	1	0.581793	1	0.614395	1	1	0.958913	1	0.957579	1	1	0	0.0969649	0	0
		IND	6	Age45-59	0.961226	1	1	0.652866	0.797557	1	1	1	1	0.719192	1	0.899972	1	0.852573	1	1	1	1	1	0	0	0	0
		IRL	1	Age45-59	1	1	1	1	0.878058	1	1	1	1	1	1	1	1	1	1	1	1	1	1	0.299923	1.89647	1.01015	0.979961
		IRN	6	Age45-59	0.911481	1	1	1	1	1	1	1	1	1	1	1	1	1	1	1	1	1	1	0	0	0	0
		IRQ	5	Age45-59	0.473525	1	1	1	0.937337	1	1	1	1	1	1	1	1	1	1	1	1	1	1	0	0	0	0
		ISL	1	Age45-59	1	1	1	0.858081	0.549624	1	1	1	1	1	1	1	0.982055	1	1	1	1	1	1	0	0.961777	0.451805	0.902029
		ISR	5	Age45-59	0.996993	1	1	1	0.938181	1	1	1	1	1	1	1	1	1	1	1	1	1	1	0.413299	0.752429	0.960267	0.175673
		ITA	1	Age45-59	1	1	1	1	0.861123	1	1	1	1	1	1	1	1	1	1	1	1	1	1	0.567971	1.11402	1.04238	0.27228
		JAM	7	Age45-59	0.556325	1	1	0.788322	0.625566	1	1	0.895019	1	0.997959	1	0.719174	0.838504	1	1	1	1	0.992607	1	0	0.355327	0	1.01258
		JOR	5	Age45-59	0.658583	1	1	1	1	1	1	1	1	1	1	1	1	1	1	1	1	1	1	0	0.222904	0.290966	0.311446
		JPN	3	Age45-59	0.580232	1	1	0.639889	0.667834	1	1	0.922188	1	0.702919	1	0.619239	0.730162	0.736786	0.861692	1	1	0.897818	1	0	0	0	0
		KAZ	5	Age45-59	1	1	1	1	0.751401	1	1	1	1	1	1	1	1	1	1	1	1	1	1	0	0.431514	0.331569	0
		KEN	4	Age45-59	0.6705	1	0.731738	1	0.959301	1	1	0.750658	1	1	1	0.951982	1	1	1	1	1	0.906463	1	0	0	0	0.095338
		KGZ	5	Age45-59	1	1	1	0.946574	0.712372	1	1	0.953036	1	0.994871	1	0.821416	0.921581	1	1	1	1	1	1	0	0	0	0
		KOR	3	Age45-59	0.749406	1	1	0.988157	1	1	1	1	1	1	1	0.83049	0.948669	1	1	1	1	1	1	0	0.166254	0.117346	0.00738878
		KWT	5	Age45-59	0.673287	1	1	1	1	1	1	1	1	1	1	1	1	1	1	1	1	1	1	0	0.382247	0.448962	0.19064
		LAO	6	Age45-59	0.46126	1	0.571611	0.608268	0.6168	1	1	1	1	0.586695	1	0.609744	1	0.369929	1	1	0.925575	1	1	0	0	0	0
		LCA	7	Age45-59	0.232585	1	0.598799	0.551156	0.516797	0.916143	0.7342	0.85887	1	0.585223	1	0.580625	0.727281	0.361087	0.86238	1	1	0.89671	1	0	0.22016	0	1.19434
		LKA	6	Age45-59	0.475832	1	0.308394	0.638949	0.332158	1	1	0.99568	1	0.532755	1	0.554895	0.933379	0.272218	1	1	1	1	1	0	0.500281	0	0.21314
		LTU	1	Age45-59	1	1	1	1	0.795485	1	1	1	1	1	1	1	1	1	1	1	1	1	1	0.0796904	1.35447	0.675004	0.517264
		LUX	1	Age45-59	1	1	1	1	0.748702	1	1	1	1	1	1	1	1	1	1	1	1	1	1	0.133004	0.957633	0.587256	0.915483
		LVA	1	Age45-59	1	1	1	1	0.663456	1	1	1	1	0.992718	1	1	1	1	1	1	1	1	1	0.152322	0.889311	0.635916	0.747155
		MAR	5	Age45-59	0.611057	1	1	1	0.923798	1	1	1	1	1	1	0.909394	1	1	1	1	1	1	1	0	0	0	0.281196
		MDA	1	Age45-59	0.776498	1	1	0.63329	0.549734	0.836029	0.987816	0.859243	1	0.6883	1	0.78779	0.784758	0.810287	0.948875	1	1	1	1	0	0.0361206	0.0623967	0
		MDG	4	Age45-59	0.432377	1	0.391136	0.611929	0.55283	0.990312	0.974263	0.689181	0.994019	0.733968	0.695964	0.563735	0.627371	0.505701	0.893235	1	1	0.780436	1	0	0	0	0
		MDV	6	Age45-59	0.398682	1	0.848855	1	0.588737	1	1	1	1	1	1	0.984317	1	0.604915	1	1	1	1	1	0	0	0	0.387436
		MEX	7	Age45-59	0.643988	1	1	1	0.716787	1	1	1	1	0.916959	1	1	1	1	1	1	1	1	1	0	0	0	1.00784
		MKD	1	Age45-59	0.878596	1	1	0.951506	0.88327	1	1	0.860105	1	0.970309	1	0.889362	0.932279	1	1	1	1	1	1	0	0.0936757	0.178977	0.162471
		MLI	4	Age45-59	0.759548	1	1	1	0.731514	1	1	0.915381	1	0.919421	1	1	1	1	1	1	1	1	1	0	0	0	0
		MLT	1	Age45-59	0.765392	1	1	1	0.911222	1	1	1	1	1	1	1	1	0.883086	1	1	1	1	1	0	0.39588	0.32055	1.45417
		MNE	1	Age45-59	1	1	1	1	0.953488	1	1	0.990804	1	1	1	1	1	1	1	1	1	1	1	0	0.506754	0.310704	0.521401
		MNG	5	Age45-59	0.927777	1	0.974802	0.614447	0.46846	1	0.96621	0.976459	1	0.64082	1	0.819158	0.945824	1	0.719181	1	1	0.88523	1	0	0	0	0
		MOZ	4	Age45-59	0.528573	1	1	1	0.798059	1	1	0.711144	1	1	0.903717	0.568179	1	0.95817	0.979887	1	1	0.992821	1	0	0	0	0
		MRT	4	Age45-59	0.782639	1	1	0.613912	0.509706	1	1	0.758703	1	0.666244	1	0.987612	1	1	0.851971	0.56086	1	1	1	0	0.202234	0	1.13958
		MUS	6	Age45-59	0.344964	1	1	0.715124	0.577542	1	1	1	1	0.692093	1	0.681356	1	0.613036	1	1	1	1	1	0	0	0	0.535935
		MWI	4	Age45-59	0.397563	1	1	1	1	1	1	1	1	1	1	0.781896	1	0.450398	1	1	1	1	1	0	0	0	0
		MYS	6	Age45-59	0.334992	1	1	0.527135	0.464482	1	0.957953	1	1	0.541601	1	0.68186	0.941511	1	1	1	1	1	1	0	0.399925	0	0.0214496
		NAM	4	Age45-59	0.516931	1	0.948181	0.801878	0.372194	1	1	0.942858	1	0.770946	1	0.871281	1	0.612322	1	1	1	0.987446	1	0	0	0	0
		NER	4	Age45-59	0.915376	1	1	1	1	1	1	1	1	1	1	1	1	1	1	1	1	1	1	0	0	0	0
		NGA	4	Age45-59	0.561983	1	1	1	1	1	1	0.953018	1	1	1	0.806608	1	1	1	1	1	1	1	0	0	0	0
		NIC	7	Age45-59	0.696888	1	1	1	0.831607	1	1	0.86178	1	0.747167	1	0.710143	1	1	1	0.947999	1	1	1	0	0	0	0.743563
		NLD	1	Age45-59	1	1	1	0.95508	0.782753	1	1	1	1	1	1	1	1	1	1	1	1	1	1	0.0837659	1.56228	0.750067	0.909941
		NOR	1	Age45-59	1	1	1	1	0.672756	1	1	1	1	0.985628	1	1	1	1	1	1	1	1	1	0.15183	1.04288	0.692285	0.663014
		NPL	6	Age45-59	0.660492	1	1	1	1	1	1	1	1	1	1	0.76869	1	0.441912	1	1	1	1	1	0	0	0	0
		NZL	2	Age45-59	1	1	1	0.786514	0.760694	1	1	1	1	0.994288	1	1	1	1	1	1	1	1	1	0.176371	1.50672	0.809135	1.24544
		PAK	6	Age45-59	1	1	1	1	0.788511	1	1	1	1	0.867062	1	0.874494	1	0.810715	1	1	1	1	1	0	0.342901	0	0.0871735
		PAN	7	Age45-59	0.424888	1	1	0.712843	0.47321	1	1	1	1	0.788509	1	0.942586	0.936542	0.427524	1	1	1	0.992757	1	0	0	0	0.336517
		PER	7	Age45-59	0.549164	1	0.911092	0.927312	0.756502	1	1	0.935805	1	1	1	0.82354	0.974798	1	1	1	1	0.867858	1	0	0	0	0
		PHL	6	Age45-59	0.292845	1	0.526074	0.614244	0.452115	1	1	1	1	0.637833	1	0.647608	1	0.718258	1	1	0.901324	1	1	0	0	0	0
		POL	1	Age45-59	1	1	1	1	0.724235	1	1	1	1	1	1	1	1	1	1	1	1	1	1	0.0809552	1.0342	0.551067	0.450285
		PRT	1	Age45-59	1	1	1	1	0.819321	1	1	1	1	1	1	1	1	1	1	1	1	1	1	0.467703	1.03212	0.9133	0.197116
		PRY	7	Age45-59	0.634658	1	1	0.665932	0.756146	1	0.952564	0.79147	1	1	1	0.82317	1	0.763946	0.788217	1	1	0.945003	1	0	0	0	0.0529265
		PSE	5	Age45-59	1	1	1	1	1	1	1	1	1	1	1	1	1	1	1	1	1	1	1	0.0932915	0.780098	0.656279	0.478417
		ROU	1	Age45-59	1	1	1	0.922671	0.792194	1	1	1	1	0.998974	1	1	1	1	1	1	1	1	1	0	0.381222	0.238048	0
		RUS	1	Age45-59	0.912456	1	1	0.900313	0.605084	1	1	0.973248	1	0.925004	1	0.894444	0.971575	1	1	1	1	1	1	0	0.274093	0.211993	0.673447
		RWA	4	Age45-59	0.535487	1	0.47049	1	1	1	1	0.813934	1	1	0.947941	0.799489	1	1	1	1	1	0.884387	1	0	0	0	0
		SAU	5	Age45-59	0.609797	1	1	1	0.773977	1	1	1	1	1	1	1	1	1	1	1	1	1	1	0	0.324887	0.2019	0.0477824
		SDN	4	Age45-59	1	1	0.951494	0.855338	0.669017	1	1	0.754264	1	0.94117	1	1	1	1	1	1	1	0.938104	1	0	0	0	0.468909
		SEN	4	Age45-59	0.337835	1	1	0.747999	0.534616	1	1	0.895459	1	0.610688	0.95244	0.572228	0.905366	1	0.956034	1	1	0.969561	1	0	0	0	0
		SLV	7	Age45-59	0.629312	1	1	1	0.805326	1	1	0.885595	1	0.7938	1	0.717601	1	0.575913	1	1	1	0.953913	1	0	0	0	0.651525
		SRB	1	Age45-59	0.790536	1	1	0.835252	0.692374	0.857296	0.980222	0.75019	1	0.706573	1	0.674156	0.905939	0.648913	0.830162	1	1	0.920132	1	0	0	0	0
		SUR	7	Age45-59	0.359431	1	1	0.570582	0.356305	0.892538	0.721764	0.898613	1	0.622492	1	0.583212	0.653072	0.362237	0.871633	1	1	0.967596	1	0	0	0	1.05774
		SVK	1	Age45-59	0.714686	1	1	0.693423	0.527038	0.974922	0.953731	0.774897	1	0.691123	1	0.769616	0.897582	1	0.845778	1	1	1	1	0.0375485	0.376737	0.338935	0.54457
		SVN	1	Age45-59	1	1	1	0.883273	0.604338	1	1	0.957304	1	0.823854	1	0.934621	1	0.942955	1	1	1	1	1	0	0.655705	0.450238	0
		SWE	1	Age45-59	1	1	1	0.925351	0.643905	1	1	1	1	0.920346	1	1	1	1	1	1	1	1	1	0.234735	1.52339	0.789401	0.699694
		SWZ	4	Age45-59	0.357217	1	0.882017	0.856828	0.397887	1	1	0.725281	1	0.621672	0.872328	0.668299	1	0.357641	0.795617	1	1	0.926324	1	0	0	0	0.867148
		THA	6	Age45-59	0.405403	1	0.986676	0.57555	0.511046	1	0.945225	1	1	0.582392	1	0.628375	0.987503	1	0.850505	1	0.866968	1	1	0	0	0	0.232982
		TJK	5	Age45-59	0.541534	1	1	0.908862	0.587085	0.934787	1	0.710937	1	0.786076	0.992319	0.531477	0.758782	1	0.737284	1	1	0.881662	1	0	0	0	0
		TTO	7	Age45-59	0.232472	1	1	0.777444	0.599788	1	0.879281	0.870977	1	0.644991	1	0.536831	0.742093	0.354413	0.815007	1	1	1	1	0	0.1098	0.0176658	1.37221
		TUN	5	Age45-59	0.776552	1	1	1	0.941029	1	1	1	1	1	1	0.902987	1	1	1	1	1	1	1	0	0	0.0325535	0.202995
		TUR	5	Age45-59	1	1	1	1	1	1	1	1	1	1	1	1	1	1	1	1	1	1	1	0	0.511993	0.560561	0.0267652
		TZA	4	Age45-59	0.752205	1	1	1	1	1	1	0.91485	1	1	1	0.886913	1	1	1	1	1	0.952939	1	0	0	0	0
		UKR	1	Age45-59	0.926216	1	1	0.957209	0.690589	1	1	0.955511	1	1	1	0.903484	1	1	1	1	1	1	1	0	0.092554	0.0967075	0.585433
		URY	7	Age45-59	1	1	1	0.696562	0.532492	1	0.944098	1	1	0.929632	1	1	1	0.873933	0.906068	1	1	1	1	0	0.283313	0	0.554659
		USA	2	Age45-59	1	1	1	0.800958	0.70873	1	1	1	1	0.914899	1	1	1	0.962215	1	1	1	1	1	0.435453	1.24072	1.28351	1.45359
		UZB	5	Age45-59	0.905901	1	1	1	0.718172	1	1	0.911496	1	1	1	0.757628	0.937788	1	1	1	1	1	1	0	0	0	0
		VCT	7	Age45-59	0.42505	1	1	0.894727	0.586476	1	1	1	1	0.942234	1	0.758125	0.932958	0.797981	1	1	1	1	1	0	0.184168	0.0300336	0.847558
		ZAF	4	Age45-59	0.470759	1	1	1	0.561428	1	1	1	1	0.802294	1	1	1	1	1	1	1	1	1	0	0	0	0.859628
		ZWE	4	Age45-59	0.312483	1	1	1	0.442262	1	1	0.786032	1	0.568759	0.975206	0.63199	1	0.573755	0.783133	0.781741	1	0.98423	1	0	0	0	0.447944
		AGO	4	Age60+	0.744282	1	1	1	1	1	1	1	1	1	1	1	1	1	1	1	1	1	1	0	0	0	0
		ALB	1	Age60+	1	1	1	1	0.8209	1	1	0.869862	1	1	1	1	1	1	1	1	1	1	1	0	0.477024	0.0718508	0.0673228
		ARE	5	Age60+	0.531415	1	1	1	1	1	1	1	1	1	1	1	1	0.643582	1	1	1	1	1	0	0.148332	0.359601	0.0575748
		ARG	7	Age60+	1	1	1	0.700491	0.521686	1	1	1	1	1	1	1	1	0.979063	1	1	1	1	1	0	0.584287	0.23056	0.577539
		ARM	1	Age60+	1	1	1	1	0.954786	1	1	1	1	1	1	1	1	1	1	1	1	1	1	0	0.291369	0.0536091	0
		ATG	7	Age60+	0.657397	1	1	0.900391	0.525869	1	1	1	1	0.897819	1	0.93954	0.923771	0.637126	1	1	1	0.918763	1	0	0.0265905	0	0.0542618
		AUS	2	Age60+	1	1	1	0.90137	0.567486	1	1	1	1	0.884324	1	1	0.933191	1	0.997028	1	1	1	1	0.678375	1.75896	1.31299	0.229533
		AUT	1	Age60+	1	1	1	1	0.680564	1	1	1	1	1	1	1	1	1	1	1	1	1	1	0.819204	1.96195	1.51852	0.28467
		AZE	1	Age60+	1	1	1	1	0.998092	1	1	1	1	1	1	1	1	0.768808	1	1	1	1	1	0	0	0	0
		BEL	1	Age60+	1	1	1	1	0.827697	1	1	1	1	1	1	1	1	1	1	1	1	1	1	0.597276	2.13039	1.41473	0.396291
		BEN	4	Age60+	0.686777	1	1	1	1	1	1	1	1	1	1	0.926485	1	0.981692	1	1	1	1	1	0	0	0	0
		BFA	4	Age60+	0.520839	1	1	1	1	1	1	1	1	1	1	1	1	1	1	0.75827	1	1	1	0	0	0	0
		BGD	6	Age60+	0.451531	1	0.657353	0.667475	0.448574	1	1	1	1	0.483516	1	0.659182	1	1	0.939611	1	1	1	1	0	0	0	0
		BGR	1	Age60+	0.906272	1	1	0.695768	0.543397	1	1	0.840247	1	0.588384	1	0.829627	0.86637	0.708926	0.70239	1	1	1	1	0	0.318238	0.246419	0
		BHS	7	Age60+	0.405775	1	1	0.900041	0.602736	1	1	1	1	0.927903	1	0.820683	0.973608	0.724328	1	1	1	1	1	0	0.472639	0.314569	0.458658
		BIH	1	Age60+	1	1	1	1	0.931188	1	1	1	1	0.944431	1	0.84686	0.968783	1	1	1	1	1	1	0	0	0	0
		BLR	1	Age60+	1	1	1	1	0.808138	1	1	1	1	1	1	1	1	1	1	1	1	1	1	0.204327	1.04038	0.732787	0
		BLZ	7	Age60+	0.524462	1	1	1	0.887492	1	1	1	1	0.891114	1	0.862701	1	0.448154	1	1	1	1	1	0	0	0	0.442283
		BOL	7	Age60+	0.533226	1	1	0.881507	0.714893	1	1	1	1	1	1	0.992676	1	0.364511	1	1	1	1	1	0	0	0	0
		BRA	7	Age60+	1	1	1	1	1	1	1	1	1	1	1	1	1	1	1	1	1	1	1	0	0.743453	0.331329	0.474469
		BRB	7	Age60+	0.440801	1	1	0.969293	0.641186	1	1	1	1	0.890161	1	0.808948	1	0.568542	1	1	1	1	1	0	0.422861	0.432623	0.866408
		BRN	6	Age60+	0.366295	1	1	0.728025	0.581774	1	1	1	1	0.538654	1	0.717779	0.943812	1	0.836525	1	1	1	1	0	0	0	0
		BWA	4	Age60+	0.738815	1	1	1	0.657598	1	1	1	1	0.909485	1	1	1	0.643462	1	1	1	1	1	0	0	0	0.301317
		CAF	4	Age60+	0.772616	1	1	1	0.678022	1	1	0.977564	1	1	1	0.981077	1	0.657122	1	1	1	1	1	0	0	0	0
		CAN	2	Age60+	1	1	1	1	0.951064	1	1	1	1	0.985744	1	1	1	1	1	1	1	1	1	0.780883	1.31549	1.30274	0.302223
		CHE	1	Age60+	1	1	1	0.890699	0.632683	1	1	0.904583	1	0.855189	1	1	0.98896	1	0.901021	1	1	1	1	0.403957	1.56742	1.01498	0.559452
		CHL	7	Age60+	0.886499	1	1	0.876656	0.672243	1	1	1	1	0.983076	1	1	1	0.712897	0.999003	1	1	1	1	0	0.162483	0	0.632815
		CHN	3	Age60+	0.814854	1	1	1	1	1	1	1	1	1	1	1	1	1	1	1	1	1	1	0	0	0	0
		CIV	4	Age60+	0.532509	1	0.970442	1	0.97178	1	1	1	1	1	1	0.991377	1	1	1	1	1	1	1	0	0.135947	0	0
		CMR	4	Age60+	0.64147	1	1	1	1	1	1	1	1	1	1	0.944438	1	1	1	1	1	1	1	0	0	0	0
		COG	4	Age60+	0.583114	1	0.762342	0.934527	0.772377	1	1	1	1	1	1	0.72729	1	1	1	1	1	1	1	0	0	0	0
		COL	7	Age60+	0.831463	1	1	0.916092	0.700038	1	1	0.960269	1	1	1	0.913973	0.98398	1	0.997328	1	1	1	1	0	0.30264	0	0.821408
		CPV	4	Age60+	1	1	1	1	0.949738	1	1	1	1	1	1	1	1	0.751865	1	1	1	1	1	0	0.332152	0.0477832	0
		CRI	7	Age60+	1	1	1	1	0.871983	1	1	1	1	1	1	1	1	1	1	1	1	1	1	0	0.730177	0.16888	0.849005
		CYP	1	Age60+	0.858773	1	1	0.803102	0.524337	1	1	0.898623	1	0.767505	1	0.988073	0.949389	0.70611	0.799893	1	1	1	1	0.182774	0.486047	0.560842	0
		CZE	1	Age60+	1	1	1	0.887902	0.541066	1	1	0.890089	1	0.73991	1	0.905784	1	0.952951	0.821311	1	1	1	1	0.368129	0.89764	0.754059	0.139472
		DEU	1	Age60+	1	1	1	0.945143	0.613685	1	1	1	1	0.904555	1	1	1	1	0.993238	1	1	1	1	0.493361	1.76076	1.17488	0.304882
		DJI	4	Age60+	0.432617	1	1	0.969814	0.889145	1	1	0.891391	1	0.771429	1	0.776728	1	1	1	1	1	1	1	0	0	0	0.375102
		DMA	7	Age60+	1	1	0.90271	1	0.862364	1	1	1	1	1	1	1	1	0.912591	1	1	1	1	1	0	0.588005	0	0.443614
		DNK	1	Age60+	1	1	1	1	0.749231	1	1	1	1	1	1	1	1	1	1	1	1	1	1	0.394525	2.30465	1.21488	0.471548
		DOM	7	Age60+	0.571429	1	1	1	0.971295	1	1	1	1	1	1	0.852965	0.990962	1	1	1	1	1	1	0	0.457326	0.113433	0.0545773
		DZA	5	Age60+	0.747651	1	1	1	1	1	1	1	1	1	1	0.932807	1	1	1	1	1	1	1	0	0	0	0
		ECU	7	Age60+	1	1	1	0.824319	0.528115	1	1	0.998892	1	1	1	1	0.991155	1	1	1	1	1	1	0	0.891049	0.180245	0
		EGY	5	Age60+	0.776364	1	1	1	1	1	1	1	1	1	1	0.916163	1	0.788837	1	1	1	1	1	0	0	0	0.134987
		ESP	1	Age60+	1	1	1	1	0.723307	1	1	1	1	1	1	1	1	0.941377	1	1	1	1	1	0.865553	1.00728	1.22386	0
		EST	1	Age60+	1	1	1	1	0.754867	1	1	1	1	1	1	1	1	1	1	1	1	1	1	0	0.926231	0.281651	0.0162625
		ETH	4	Age60+	0.782261	1	0.74603	1	1	1	1	0.932944	1	0.977332	1	0.971118	1	0.848729	1	1	1	1	1	0	0	0	0
		FIN	1	Age60+	1	1	1	1	0.593855	1	1	1	1	0.949683	1	1	1	1	1	1	1	1	1	0.172118	1.37391	0.684981	0
		FJI	2	Age60+	0.382195	1	1	1	0.664963	1	1	1	1	0.915468	1	0.542241	1	0.544582	0.860925	1	1	1	1	0	1.41318	0.254622	0
		FRA	1	Age60+	1	1	1	0.97662	0.687481	1	1	1	1	1	1	1	1	1	1	1	1	1	1	0.398966	1.89144	1.15961	0.0153436
		GBR	1	Age60+	1	1	1	1	0.653634	1	1	1	1	1	1	1	1	1	1	1	1	1	1	0.245845	0.807773	0.686007	0.0865193
		GEO	1	Age60+	0.970904	1	1	1	0.731792	1	1	1	1	1	1	1	1	0.463277	1	1	1	1	1	0	0	0	0
		GHA	4	Age60+	0.737537	1	1	1	1	1	1	1	1	1	1	1	1	1	1	1	1	1	1	0	0	0	0
		GIN	4	Age60+	0.552582	1	1	1	0.613461	1	1	1	1	0.981987	1	0.701844	0.866855	1	1	1	1	1	1	0	0	0	0
		GMB	4	Age60+	0.409601	1	1	1	0.556842	1	1	1	1	0.725313	1	0.746242	1	1	1	0.810493	1	1	1	0	0.0130555	0	0.252308
		GNB	4	Age60+	0.453276	1	1	0.762033	0.526715	1	1	0.883666	1	0.75043	1	0.690567	1	1	1	1	1	1	1	0	0.0217711	0	0
		GRC	1	Age60+	1	1	1	1	0.889964	1	1	1	1	1	1	1	1	1	1	1	1	1	1	0.655974	1.39903	1.15773	0
		GRD	7	Age60+	0.356023	1	1	1	0.773765	1	1	1	1	0.861473	1	0.72188	0.860626	0.401767	0.925922	1	1	1	1	0	0.639213	0.221215	0.338761
		GUY	7	Age60+	0.591223	1	0.501382	1	0.615976	1	1	1	1	0.948386	1	0.787944	0.957603	0.427885	0.984073	1	1	1	1	0	0.344443	0	0.425566
		HND	7	Age60+	0.754061	1	1	1	0.707274	1	1	1	1	0.861996	1	0.88022	1	1	1	1	1	1	1	0	0.271609	0	0.491159
		HRV	1	Age60+	1	1	1	0.742705	0.481157	1	1	0.790772	1	0.701639	1	0.894294	0.951875	1	0.788819	1	1	1	1	0	0.735543	0.424098	0.394478
		HTI	7	Age60+	0.359143	1	1	1	1	1	1	0.732933	1	1	0.931203	0.567556	0.995822	1	0.983904	1	1	0.893331	1	0	0	0	0
		HUN	1	Age60+	0.875386	1	1	0.745828	0.474821	1	1	0.717556	1	0.649871	1	0.748358	0.859928	1	0.704404	1	1	1	1	0.332404	1.10097	0.865349	0
		IDN	6	Age60+	0.377651	1	0.882546	0.89774	0.686431	1	1	1	1	0.650176	1	0.671102	1	1	0.970452	1	1	1	1	0	0.188158	0	0
		IND	6	Age60+	1	1	1	0.828955	0.864175	1	1	1	1	0.799525	1	1	1	0.86291	1	1	1	1	1	0	0	0	0
		IRL	1	Age60+	1	1	1	1	0.87539	1	1	1	1	1	1	1	1	1	1	1	1	1	1	0.412473	2.34439	1.23359	0.304065
		IRN	6	Age60+	0.98438	1	1	1	1	1	1	1	1	1	1	1	1	1	1	1	1	1	1	0	0	0.107546	0
		IRQ	5	Age60+	0.513187	1	1	1	1	1	1	1	1	1	1	1	1	1	1	1	1	1	1	0	0	0	0
		ISL	1	Age60+	1	1	1	0.957561	0.549653	1	1	1	1	1	1	1	0.974855	1	1	1	1	1	1	0	1.19937	0.571931	0.244918
		ISR	5	Age60+	1	1	1	1	1	1	1	1	1	1	1	1	1	1	1	1	1	1	1	0.565661	1.0274	1.17211	0.193511
		ITA	1	Age60+	1	1	1	1	0.819124	1	1	1	1	1	1	1	1	1	1	1	1	1	1	0.651779	1.32171	1.17777	0
		JAM	7	Age60+	0.705275	1	1	1	0.729196	1	1	1	1	1	1	0.898283	1	1	1	1	1	1	1	0	0.681155	0.157857	0.632726
		JOR	5	Age60+	0.715772	1	1	1	1	1	1	1	1	1	1	1	1	1	1	1	1	1	1	0	0.359402	0.425131	0.329269
		JPN	3	Age60+	0.633234	1	1	0.788846	0.768347	1	1	0.940411	1	0.774792	1	0.65369	0.788959	0.731964	0.836421	1	1	0.956117	1	0	0	0	0
		KAZ	5	Age60+	1	1	1	1	0.742314	1	1	1	1	1	1	1	1	1	1	1	1	1	1	0	0.659717	0.451847	0
		KEN	4	Age60+	0.985385	1	0.917722	1	1	1	1	0.926571	1	1	1	1	1	1	1	1	1	1	1	0	0.00389413	0	0
		KGZ	5	Age60+	1	1	1	1	0.728628	1	1	0.983162	1	0.965609	1	0.875289	0.961309	1	1	1	1	1	1	0	0.124639	0	0
		KOR	3	Age60+	0.774851	1	1	1	1	1	1	1	1	1	1	0.856656	1	1	1	1	1	1	1	0	0.130968	0.138004	0
		KWT	5	Age60+	0.721896	1	1	1	1	1	1	1	1	1	1	1	1	1	1	1	1	1	1	0.00445564	0.576915	0.631692	0.20312
		LAO	6	Age60+	0.492671	1	0.640088	0.762319	0.677859	1	1	1	1	0.644564	1	0.65434	1	0.362973	1	1	0.989138	1	1	0	0	0	0
		LCA	7	Age60+	0.276422	1	0.768828	0.745706	0.619459	1	0.967748	1	1	0.702009	1	0.698146	0.895609	0.390184	0.953944	1	1	1	1	0	0.501896	0.070708	0.781832
		LKA	6	Age60+	0.514671	1	0.362572	0.852326	0.380862	1	1	1	1	0.607493	1	0.641281	1	0.264203	1	1	1	1	1	0	0.732158	0	0.0423239
		LTU	1	Age60+	1	1	1	1	0.82009	1	1	1	1	1	1	1	1	1	1	1	1	1	1	0.14002	1.69766	0.832081	0.164457
		LUX	1	Age60+	1	1	1	1	0.751709	1	1	1	1	1	1	1	1	1	1	1	1	1	1	0.185123	1.16601	0.694565	0.230963
		LVA	1	Age60+	1	1	1	1	0.66648	1	1	1	1	1	1	1	1	1	1	1	1	1	1	0.18432	1.21309	0.765058	0.345098
		MAR	5	Age60+	0.656855	1	1	1	1	1	1	1	1	1	1	0.998882	1	1	1	1	1	1	1	0	0	0	0.299823
		MDA	1	Age60+	0.895342	1	1	0.716405	0.571579	1	1	0.905208	1	0.678732	1	0.842799	0.809341	0.778485	0.872048	1	1	1	1	0	0.178486	0.147776	0
		MDG	4	Age60+	0.584477	1	0.472505	0.88239	0.738602	1	1	0.942135	1	0.95334	1	0.760751	0.849208	0.506041	1	1	1	1	1	0	0	0	0
		MDV	6	Age60+	0.413824	1	0.957144	1	0.627423	1	1	1	1	1	1	1	1	0.581365	1	1	1	1	1	0	0.0171815	0	0.165224
		MEX	7	Age60+	0.768619	1	1	1	0.815608	1	1	1	1	1	1	1	1	1	1	1	1	1	1	0	0.204587	0.0426525	0.611517
		MKD	1	Age60+	0.987334	1	1	1	0.890013	1	1	0.859896	1	0.940745	1	0.914137	0.951678	0.976741	1	1	1	1	1	0	0.264965	0.28051	0
		MLI	4	Age60+	1	1	1	1	1	1	1	1	1	1	1	1	1	1	1	1	1	1	1	0	0.0357285	0	0
		MLT	1	Age60+	0.788522	1	1	1	0.869841	1	1	1	1	1	1	1	1	0.826682	1	1	1	1	1	0	0.461408	0.367634	0.645473
		MNE	1	Age60+	1	1	1	1	0.93993	1	1	0.972627	1	1	1	1	1	1	1	1	1	1	1	0	0.742329	0.425066	0.196617
		MNG	5	Age60+	1	1	1	0.705662	0.480968	1	1	0.956499	1	0.643818	1	0.90941	1	1	0.657436	1	1	1	1	0	0	0	0
		MOZ	4	Age60+	0.666255	1	1	1	1	1	1	0.910321	1	1	1	0.731276	1	0.933278	1	1	1	1	1	0	0	0	0
		MRT	4	Age60+	1	1	1	1	0.790453	1	1	1	1	0.984226	1	1	1	1	1	0.682297	1	1	1	0	0.600972	0.0699611	0.66344
		MUS	6	Age60+	0.442369	1	1	1	0.803414	1	1	1	1	0.865697	1	0.872382	1	0.622625	1	1	1	1	1	0	0	0.0295988	0.201943
		MWI	4	Age60+	0.523694	1	1	1	1	1	1	1	1	1	1	0.967006	1	0.480385	1	1	1	1	1	0	0	0	0
		MYS	6	Age60+	0.349929	1	1	0.672667	0.511475	1	1	1	1	0.585682	1	0.704053	1	1	0.967721	1	1	1	1	0	0.379567	0	0
		NAM	4	Age60+	0.739815	1	1	1	0.488523	1	1	1	1	0.985563	1	1	1	0.642891	1	1	1	1	1	0	0	0.162034	0
		NER	4	Age60+	1	1	1	1	1	1	1	1	1	1	1	1	1	1	1	1	1	1	1	0	0.0611825	0	0
		NGA	4	Age60+	0.672463	1	1	1	1	1	1	1	1	1	1	1	1	1	1	1	1	1	1	0	0.0257732	0	0
		NIC	7	Age60+	0.858814	1	1	1	0.957642	1	1	1	1	0.894429	1	0.852828	1	1	1	1	1	1	1	0	0	0	0.425175
		NLD	1	Age60+	1	1	1	1	0.792097	1	1	1	1	1	1	1	1	1	1	1	1	1	1	0.178328	1.94223	0.941659	0.256427
		NOR	1	Age60+	1	1	1	1	0.665639	1	1	1	1	1	1	1	1	1	1	1	1	1	1	0.228901	1.29141	0.835153	0.0757159
		NPL	6	Age60+	0.72074	1	1	1	1	1	1	1	1	1	1	0.855081	1	0.440569	1	1	1	1	1	0	0	0	0
		NZL	2	Age60+	1	1	1	0.864889	0.729285	1	1	1	1	0.981879	1	1	1	1	1	1	1	1	1	0.252184	1.82256	0.962891	0.476573
		PAK	6	Age60+	1	1	1	1	0.875643	1	1	1	1	0.965562	1	1	1	0.845101	1	1	1	1	1	0	0.615749	0	0
		PAN	7	Age60+	0.513391	1	1	0.943432	0.558626	1	1	1	1	0.957981	1	1	1	0.468902	1	1	1	1	1	0	0.0365366	0	0.076257
		PER	7	Age60+	0.669784	1	1	1	0.894969	1	1	1	1	1	1	1	1	1	1	1	1	1	1	0	0	0	0
		PHL	6	Age60+	0.305221	1	0.547277	0.779453	0.504423	1	1	1	1	0.708961	1	0.684564	1	0.657678	1	1	0.923559	1	1	0	0	0	0
		POL	1	Age60+	1	1	1	1	0.735136	1	1	1	1	1	1	1	1	1	1	1	1	1	1	0.102654	1.30704	0.654574	0.12412
		PRT	1	Age60+	1	1	1	1	0.78421	1	1	1	1	1	1	1	1	1	1	1	1	1	1	0.528653	1.19316	1.01639	0
		PRY	7	Age60+	0.765203	1	1	0.904237	0.918856	1	1	0.986475	1	1	1	1	1	0.813514	0.872208	1	1	1	1	0	0.187575	0.0521116	0
		PSE	5	Age60+	1	1	1	1	1	1	1	1	1	1	1	1	1	1	1	1	1	1	1	0.224413	1.10514	0.887609	0.497054
		ROU	1	Age60+	1	1	1	1	0.80311	1	1	1	1	0.98605	1	1	1	1	1	1	1	1	1	0	0.610564	0.359336	0
		RUS	1	Age60+	1	1	1	1	0.615871	1	1	0.991421	1	0.910862	1	0.922611	1	1	0.990028	1	1	1	1	0	0.447201	0.30502	0.310081
		RWA	4	Age60+	0.701944	1	0.626164	1	1	1	1	0.958915	1	1	1	0.972845	1	1	1	1	1	1	1	0	0	0	0
		SAU	5	Age60+	0.67303	1	1	1	0.876549	1	1	1	1	1	1	1	1	1	1	1	1	1	1	0	0.504799	0.360885	0.0511443
		SDN	4	Age60+	1	1	1	1	0.923232	1	1	0.923758	1	1	1	1	1	1	1	1	1	1	1	0	0.261912	0	0.184474
		SEN	4	Age60+	0.440772	1	1	1	0.751842	1	1	1	1	0.809096	1	0.771741	1	1	1	1	1	1	1	0	0	0	0
		SLV	7	Age60+	0.739145	1	1	1	0.940872	1	1	1	1	0.945159	1	0.847851	1	0.632764	1	1	1	1	1	0	0	0	0.325961
		SRB	1	Age60+	0.924606	1	1	0.960937	0.736155	1	1	0.766809	1	0.717731	1	0.713235	0.927151	0.661711	0.762593	1	1	1	1	0	0.00714695	0	0
		SUR	7	Age60+	0.391657	1	1	0.772511	0.418725	1	0.94055	1	1	0.752614	1	0.710241	0.805349	0.39277	0.960143	1	1	1	1	0	0	0	0.665327
		SVK	1	Age60+	0.811182	1	1	0.797407	0.529825	1	1	0.775507	1	0.676998	1	0.784993	0.897188	0.97337	0.748448	1	1	1	1	0.0203626	0.514075	0.369911	0.225752
		SVN	1	Age60+	1	1	1	0.949598	0.61735	1	1	0.959137	1	0.795383	1	0.965361	1	0.966367	0.900453	1	1	1	1	0	0.875274	0.554885	0
		SWE	1	Age60+	1	1	1	1	0.643386	1	1	1	1	0.936719	1	1	1	1	1	1	1	1	1	0.319653	1.84758	0.953429	0.0983068
		SWZ	4	Age60+	0.472658	1	1	1	0.510019	1	1	0.866845	1	0.754349	1	0.851104	1	0.385504	0.903509	1	1	1	1	0	0	0	0.489837
		THA	6	Age60+	0.439789	1	1	0.746635	0.586258	1	1	1	1	0.65764	1	0.661334	1	0.99893	0.847267	1	0.912008	1	1	0	0	0	0
		TJK	5	Age60+	0.576147	1	1	1	0.596043	1	1	0.747122	1	0.761695	1	0.545079	0.800411	1	0.659915	1	1	1	1	0	0	0	0
		TTO	7	Age60+	0.262284	1	1	1	0.697909	1	1	1	1	0.740575	1	0.630091	0.880507	0.378415	0.870341	1	1	1	1	0	0.331436	0.198323	0.948755
		TUN	5	Age60+	0.844191	1	1	1	1	1	1	1	1	1	1	0.991652	1	1	1	1	1	1	1	0	0.0409685	0.127535	0.209432
		TUR	5	Age60+	1	1	1	1	1	1	1	1	1	1	1	1	1	1	1	1	1	1	1	0.0347149	0.71636	0.727746	0.034972
		TZA	4	Age60+	0.938394	1	1	1	1	1	1	1	1	1	1	1	1	1	1	1	1	1	1	0	0	0	0
		UKR	1	Age60+	1	1	1	1	0.693237	1	1	0.980762	1	1	1	0.936408	1	1	1	1	1	1	1	0	0.251967	0.182582	0.242028
		URY	7	Age60+	1	1	1	0.939222	0.657435	1	1	1	1	1	1	1	1	1	1	1	1	1	1	0	0.840875	0.134857	0.230199
		USA	2	Age60+	1	1	1	0.879083	0.686871	1	1	1	1	0.89467	1	1	1	0.954085	1	1	1	1	1	0.482809	1.40492	1.40026	0.607209
		UZB	5	Age60+	1	1	1	1	0.714297	1	1	0.928662	1	1	1	0.77624	0.966306	1	0.949293	1	1	1	1	0	0.0206791	0	0
		VCT	7	Age60+	0.498242	1	1	1	0.702341	1	1	1	1	1	1	0.91957	1	0.839602	1	1	1	1	1	0	0.488245	0.289406	0.468801
		ZAF	4	Age60+	0.672983	1	1	1	0.73221	1	1	1	1	0.994284	1	1	1	1	1	1	1	1	1	0	0.144843	0.0260186	0.444397
		ZWE	4	Age60+	0.425839	1	1	1	0.583893	1	1	0.923413	1	0.723081	1	0.819963	1	0.601905	0.897733	0.861904	1	1	1	0	0	0	0.148183
		AGO	4	MEAN	0.689698	1	1	1	1	1	1	1	1	1	1	1	1	1	1	1	1	1	1	0	0	0	0
		ALB	1	MEAN	1	1	1	0.840507	0.823572	1	1	0.923027	1	1	1	1	1	1	1	1	1	1	1	0	0.426199	0.0525128	1.31191
		ARE	5	MEAN	0.491464	1	1	1	1	1	1	1	1	1	1	1	1	0.643423	1	1	1	1	1	0	0.100709	0.323752	0.831929
		ARG	7	MEAN	1	1	1	0.549825	0.5316	1	0.980241	1	1	1	1	1	1	0.946038	1	1	1	1	1	0	0.390176	0.122175	1.49842
		ARM	1	MEAN	1	1	1	1	0.887745	1	1	1	1	1	1	1	1	1	1	1	1	1	1	0	0.232825	0.00922882	0.990515
		ATG	7	MEAN	0.642092	1	1	0.701416	0.528941	1	0.98153	1	1	0.856624	1	0.902054	0.937132	0.600685	1	1	1	0.874825	1	0	0	0	0.657535
		AUS	2	MEAN	1	1	1	0.665111	0.584502	1	1	1	1	0.848001	1	1	1	1	1	1	1	1	1	0.582451	1.66494	1.19779	1.44995
		AUT	1	MEAN	1	1	1	0.866391	0.702464	1	1	1	1	0.987399	1	1	1	1	1	1	1	1	1	0.743991	1.87274	1.41932	1.51264
		AZE	1	MEAN	1	1	1	1	0.849532	1	1	1	1	1	1	1	1	0.774868	1	1	1	1	1	0	0	0	0
		BEL	1	MEAN	1	1	1	0.79372	0.84819	1	1	1	1	1	1	1	1	1	1	1	1	1	1	0.535	2.03173	1.3241	1.70759
		BEN	4	MEAN	0.634281	1	1	1	1	1	1	1	1	1	1	0.881821	1	0.977085	1	1	1	1	1	0	0	0	0
		BFA	4	MEAN	0.42231	1	1	1	1	1	1	1	1	0.988295	1	0.934207	1	1	1	0.721191	1	1	1	0	0	0	0
		BGD	6	MEAN	0.394604	1	0.589447	0.477669	0.413289	1	1	1	1	0.432501	1	0.574866	1	1	0.991195	1	0.829346	1	1	0	0	0	0
		BGR	1	MEAN	0.892631	1	1	0.555973	0.570001	0.820846	1	0.91049	1	0.608898	1	0.879548	0.966748	0.751835	0.904938	1	1	1	1	0	0.300567	0.244207	0.49684
		BHS	7	MEAN	0.389851	1	1	0.699005	0.604436	0.913486	1	1	1	0.894973	1	0.798936	0.993828	0.703855	1	1	1	1	1	0	0.296409	0.175159	1.31085
		BIH	1	MEAN	1	1	1	0.912445	0.951878	0.973194	1	1	1	0.948444	1	0.859475	1	1	1	1	1	1	1	0	0	0	0.0648058
		BLR	1	MEAN	1	1	1	1	0.819955	1	1	1	1	1	1	1	1	1	1	1	1	1	1	0.258578	0.97272	0.744348	0.916754
		BLZ	7	MEAN	0.5423	1	1	0.998849	0.905274	1	1	1	1	0.859981	1	0.852889	1	0.425405	1	1	1	1	1	0	0	0	1.33193
		BOL	7	MEAN	0.548685	1	1	0.706277	0.741501	1	1	1	1	0.999633	1	0.995381	1	0.353225	1	1	1	0.976709	1	0	0	0	0.404636
		BRA	7	MEAN	1	1	1	0.955888	1	1	1	1	1	1	1	1	1	1	1	1	1	1	1	0	0.578335	0.241124	1.33633
		BRB	7	MEAN	0.426027	1	1	0.775828	0.667004	1	1	1	1	0.877453	1	0.797287	1	0.550825	1	1	1	1	1	0	0.26623	0.314043	1.83456
		BRN	6	MEAN	0.387351	1	1	0.539795	0.578414	1	1	1	1	0.559937	1	0.841437	1	1	1	1	1	1	1	0	0.128393	0	1.65068
		BWA	4	MEAN	0.563793	1	1	0.757578	0.574874	1	1	1	1	0.80802	1	1	1	0.574829	1	1	1	1	1	0	0	0	0.57429
		CAF	4	MEAN	0.700021	1	1	1	0.70044	1	1	0.964665	1	1	1	0.924937	1	0.637592	1	1	1	1	1	0	0	0	0
		CAN	2	MEAN	1	1	1	0.823625	1	1	1	1	1	0.95616	1	1	1	1	1	1	1	1	1	0.673061	1.23082	1.17879	1.5569
		CHE	1	MEAN	1	1	1	0.684995	0.652015	0.957404	1	0.956949	1	0.829798	1	1	1	1	1	1	1	1	1	0.344097	1.48503	0.933982	2.04215
		CHL	7	MEAN	0.879134	1	1	0.700123	0.695981	1	1	1	1	0.97303	1	1	1	0.682635	1	1	1	1	1	0	0.0316904	0	1.56322
		CHN	3	MEAN	0.835697	1	1	1	1	1	1	1	1	1	1	1	1	1	1	1	1	1	1	0	0	0	0
		CIV	4	MEAN	0.523774	1	0.881046	1	0.979553	1	1	1	1	1	1	0.977322	1	1	1	1	1	1	1	0	0.0567387	0	0
		CMR	4	MEAN	0.563296	1	1	1	1	1	1	1	1	1	1	0.856333	1	1	1	1	1	1	1	0	0	0	0
		COG	4	MEAN	0.567815	1	0.691777	0.737629	0.751814	1	1	1	1	1	1	0.70783	1	1	1	1	1	1	1	0	0	0	0
		COL	7	MEAN	0.855673	1	1	0.720379	0.720603	1	1	0.971799	1	1	1	0.928947	1	1	1	1	1	1	1	0	0.218411	0	1.90042
		CPV	4	MEAN	0.717912	1	1	0.97748	0.805702	1	1	1	1	1	1	1	1	0.676561	1	1	1	1	1	0	0.0963301	0	0.167546
		CRI	7	MEAN	1	1	1	0.95874	0.902327	1	1	1	1	1	1	1	1	1	1	1	1	1	1	0	0.582713	0.0903077	1.91834
		CYP	1	MEAN	0.9048	1	1	0.587668	0.536434	0.890996	1	0.937348	1	0.729496	1	1	1	0.711177	0.957403	1	1	1	1	0.122448	0.4271	0.484713	0.792413
		CZE	1	MEAN	1	1	1	0.692141	0.565062	1	1	0.980309	1	0.768866	1	0.969354	1	0.973383	1	1	1	1	1	0.488036	0.873283	0.839355	1.22497
		DEU	1	MEAN	1	1	1	0.725041	0.642166	1	1	1	1	0.89028	1	1	1	1	1	1	1	1	1	0.437245	1.66988	1.09368	1.52055
		DJI	4	MEAN	0.36921	1	0.954033	0.721639	0.799912	1	1	0.860513	1	0.695545	1	0.715263	1	1	1	1	1	1	1	0	0	0	0.628558
		DMA	7	MEAN	0.985074	1	0.819401	1	0.851269	1	1	1	1	1	1	1	1	0.862385	1	1	1	1	1	0	0.378495	0	1.29155
		DNK	1	MEAN	1	1	1	0.989882	0.761103	1	1	1	1	1	1	1	1	1	1	1	1	1	1	0.326901	2.19904	1.10889	1.80664
		DOM	7	MEAN	0.573297	1	1	0.885043	0.980017	1	1	0.98976	1	1	1	0.828292	1	1	1	1	1	1	1	0	0.368436	0.0515003	0.683878
		DZA	5	MEAN	0.768113	1	1	1	1	1	1	1	1	1	1	0.901062	1	1	1	1	1	1	1	0	0	0	0.440992
		ECU	7	MEAN	1	1	1	0.64448	0.537877	1	1	0.99522	1	1	1	1	1	1	1	1	1	1	1	0	0.776088	0.120548	0.004215
		EGY	5	MEAN	0.82434	1	1	1	1	1	1	1	1	1	1	0.921767	1	0.749382	1	1	1	1	1	0	0	0	0.821153
		ESP	1	MEAN	1	1	1	0.797717	0.761169	1	1	1	1	0.977268	1	1	1	0.96553	1	1	1	1	1	0.798259	0.934079	1.13919	0.297683
		EST	1	MEAN	1	1	1	1	0.7858	1	1	1	1	1	1	1	1	1	1	1	1	1	1	0	0.823312	0.244244	1.06112
		ETH	4	MEAN	0.634267	1	0.632742	1	0.849972	1	1	0.901455	1	0.8542	1	0.843225	1	0.831436	1	1	1	1	1	0	0	0	0
		FIN	1	MEAN	1	1	1	0.831226	0.602376	0.985836	1	1	1	0.900379	1	1	1	1	1	1	1	1	1	0.113337	1.31267	0.610733	0.624869
		FJI	2	MEAN	0.415942	1	1	1	0.63649	1	1	1	1	0.880832	1	0.595118	1	0.649386	1	1	1	1	1	0	1.37015	0.290985	1.08588
		FRA	1	MEAN	1	1	1	0.733032	0.711481	1	1	1	1	0.963685	1	1	1	1	1	1	1	1	1	0.340421	1.80692	1.0767	0.987354
		GBR	1	MEAN	1	1	1	0.802787	0.660378	1	1	1	1	0.962753	1	1	1	1	1	1	1	1	1	0.169183	0.72861	0.590154	1.11275
		GEO	1	MEAN	0.893535	1	1	1	0.636491	1	1	1	1	0.892289	1	1	1	0.462297	1	1	1	1	1	0	0	0	0.588514
		GHA	4	MEAN	0.741735	1	0.925782	1	1	1	1	1	1	1	1	1	1	1	1	1	1	1	1	0	0	0	0
		GIN	4	MEAN	0.487718	1	1	0.787755	0.622992	1	1	0.998349	1	0.929414	1	0.647985	0.864197	1	1	1	1	1	1	0	0	0	0
		GMB	4	MEAN	0.354673	1	1	0.822366	0.530996	1	1	1	1	0.64617	1	0.668043	1	1	1	0.746136	1	1	1	0	0	0	0.399367
		GNB	4	MEAN	0.3869	1	1	0.569374	0.500782	1	1	0.859645	1	0.691978	0.985068	0.627666	1	1	1	1	1	1	1	0	0	0	0
		GRC	1	MEAN	1	1	1	0.914454	0.930207	1	1	1	1	1	1	1	1	1	1	1	1	1	1	0.594015	1.31257	1.07357	0.436248
		GRD	7	MEAN	0.339895	1	1	0.90099	0.793575	1	1	0.994385	1	0.819039	1	0.709368	0.880463	0.39387	1	1	1	1	1	0	0.483348	0.10603	1.147
		GUY	7	MEAN	0.609564	1	0.454683	0.868089	0.627481	1	1	1	1	0.919237	1	0.777694	0.985789	0.41083	1	1	1	1	1	0	0.213871	0	1.25922
		HND	7	MEAN	0.792955	1	1	1	0.725072	1	1	1	1	0.84262	1	0.879874	1	1	1	1	1	1	1	0	0.231707	0	1.3941
		HRV	1	MEAN	1	1	1	0.608768	0.501767	0.857157	1	0.8332	1	0.730069	1	0.935912	1	1	0.996096	1	1	1	1	0	0.653789	0.378343	1.76449
		HTI	7	MEAN	0.373482	1	1	0.879809	1	1	1	0.74862	1	1	0.987478	0.5644	1	1	1	1	1	0.855763	1	0	0	0	0
		HUN	1	MEAN	0.87337	1	1	0.610686	0.498902	0.827051	1	0.805393	1	0.692414	1	0.813905	0.996912	1	0.93605	1	1	1	1	0.354047	1.07332	0.868002	0.680717
		IDN	6	MEAN	0.370698	1	0.803353	0.664239	0.660267	1	1	1	1	0.605872	1	0.672518	1	1	1	1	0.905071	1	1	0	0.198802	0	0
		IND	6	MEAN	1	1	1	0.596544	0.846794	1	1	1	1	0.754157	1	0.956143	1	0.915826	1	1	1	1	1	0	0	0	0.228087
		IRL	1	MEAN	1	1	1	0.88494	0.877713	1	1	1	1	1	1	1	1	1	1	1	1	1	1	0.345749	2.28747	1.15117	1.59484
		IRN	6	MEAN	0.915087	1	1	1	1	1	1	1	1	1	1	1	1	0.991799	1	1	1	1	1	0	0	0.0399576	0.53003
		IRQ	5	MEAN	0.381368	1	1	1	0.764917	1	1	1	1	0.843455	1	0.854679	1	1	1	1	1	1	1	0	0	0	0
		ISL	1	MEAN	1	1	1	0.66249	0.538903	1	1	1	1	0.928495	1	1	0.988602	1	1	1	1	1	1	0	1.11241	0.488244	1.49368
		ISR	5	MEAN	1	1	1	1	1	1	1	1	1	1	1	1	1	1	1	1	1	1	1	0.500473	0.990782	1.09697	0.810854
		ITA	1	MEAN	1	1	1	0.915564	0.863996	1	1	1	1	1	1	1	1	1	1	1	1	1	1	0.592615	1.24048	1.09713	0.532666
		JAM	7	MEAN	0.678389	1	1	0.839853	0.744558	1	1	1	1	1	1	0.880066	1	1	1	1	1	1	1	0	0.550875	0.0641857	1.64436
		JOR	5	MEAN	0.653059	1	1	1	1	1	1	1	1	1	1	1	1	1	1	1	1	1	1	0	0.307203	0.324215	1.18019
		JPN	3	MEAN	0.683652	1	1	0.625793	0.773372	1	1	1	1	0.784141	1	0.723684	0.870011	0.784174	1	1	1	1	1	0	0.0249835	0.0108947	0.487881
		KAZ	5	MEAN	1	1	1	0.921144	0.714828	1	1	1	1	1	1	1	1	1	1	1	1	1	1	0	0.608432	0.425464	0.502107
		KEN	4	MEAN	0.717393	1	0.764286	1	1	1	1	0.878454	1	1	1	1	1	1	1	1	1	1	1	0	0	0	0
		KGZ	5	MEAN	1	1	1	0.747749	0.685672	0.95189	1	0.977546	1	0.892627	1	0.866022	0.941461	1	1	1	1	1	1	0	0.0874664	0	0.240253
		KOR	3	MEAN	0.802334	1	1	0.956288	1	1	1	1	1	1	1	0.9266	1	1	1	1	1	1	1	0	0.341255	0.226653	0.900948
		KWT	5	MEAN	0.644517	1	1	1	1	1	1	1	1	1	1	1	1	1	1	1	1	1	1	0	0.515529	0.546756	0.857392
		LAO	6	MEAN	0.457346	1	0.560261	0.563147	0.640555	1	1	1	1	0.599133	1	0.652094	1	0.344937	1	1	0.891339	1	1	0	0	0	0
		LCA	7	MEAN	0.267828	1	0.682164	0.593427	0.644145	0.970918	0.937538	1	1	0.684762	1	0.695059	0.932218	0.384985	1	1	1	1	1	0	0.38004	0	1.81876
		LKA	6	MEAN	0.487125	1	0.306005	0.585543	0.356553	1	1	1	1	0.56523	1	0.582054	1	0.275125	1	1	1	1	1	0	0.582528	0	0.560184
		LTU	1	MEAN	1	1	1	0.978371	0.839956	1	1	1	1	1	1	1	1	1	1	1	1	1	1	0.151651	1.57723	0.796085	1.39937
		LUX	1	MEAN	1	1	1	0.948561	0.75073	1	1	1	1	1	1	1	1	1	1	1	1	1	1	0.135518	1.08264	0.623013	1.45416
		LVA	1	MEAN	1	1	1	1	0.693481	1	1	1	1	0.999585	1	1	1	1	1	1	1	1	1	0.225613	1.12301	0.761569	1.71391
		MAR	5	MEAN	0.648999	1	1	1	0.994284	1	1	1	1	1	1	0.940385	1	1	1	1	1	1	1	0	0	0	1.08061
		MDA	1	MEAN	0.88666	1	1	0.549846	0.580846	0.744383	1	0.929167	1	0.67569	1	0.866749	0.864529	0.766823	1	1	1	1	1	0	0.148464	0.13148	0.70706
		MDG	4	MEAN	0.515995	1	0.418215	0.692353	0.709506	1	1	0.931239	1	0.911377	0.98317	0.694297	0.82008	0.502493	1	1	1	1	1	0	0	0	0
		MDV	6	MEAN	0.406589	1	0.855452	1	0.639661	1	1	1	1	1	1	1	1	0.610844	1	1	1	1	1	0	0	0	0.896735
		MEX	7	MEAN	0.786965	1	1	1	0.838352	1	1	1	1	1	1	1	1	1	1	1	1	1	1	0	0.117868	0	1.58527
		MKD	1	MEAN	0.984252	1	1	0.817865	0.91933	1	1	0.905171	1	0.937537	1	0.956892	1	1	1	1	1	1	1	0	0.225141	0.25821	0.969969
		MLI	4	MEAN	0.828202	1	1	1	0.910802	1	1	1	1	1	1	1	1	0.994154	1	1	1	1	1	0	0	0	0
		MLT	1	MEAN	0.809274	1	1	0.934613	0.891153	1	1	1	1	1	1	1	1	0.806825	1	1	1	1	1	0	0.40382	0.311133	2.16649
		MNE	1	MEAN	1	1	1	1	0.947786	1	1	1	1	1	1	1	1	0.995294	1	1	1	1	1	0	0.705408	0.422631	1.52898
		MNG	5	MEAN	1	1	0.994175	0.516139	0.476855	1	1	1	1	0.645192	1	0.943454	1	1	0.82581	1	1	0.945132	1	0	0	0	0
		MOZ	4	MEAN	0.601121	1	1	1	0.962419	1	1	0.87817	1	1	1	0.688506	1	0.97027	1	1	1	1	1	0	0	0	0
		MRT	4	MEAN	0.861393	1	1	0.701156	0.632598	1	1	0.936733	1	0.779064	1	1	1	1	1	0.586686	1	1	1	0	0.244954	0	0.885142
		MUS	6	MEAN	0.396192	1	1	0.811739	0.728669	1	1	1	1	0.823962	1	0.828554	1	0.617425	1	1	1	1	1	0	0	0	0.55585
		MWI	4	MEAN	0.429746	1	1	1	1	1	1	1	1	1	1	0.907342	1	0.438828	1	1	1	1	1	0	0	0	0
		MYS	6	MEAN	0.340543	1	1	0.498174	0.509961	1	1	1	1	0.571834	1	0.764261	1	1	1	1	1	1	1	0	0.613225	0	1.28422
		NAM	4	MEAN	0.572838	1	1	0.89203	0.475667	1	1	1	1	0.920578	1	1	1	0.594671	1	1	1	1	1	0	0	0.057231	0
		NER	4	MEAN	0.953104	1	1	1	1	1	1	1	1	1	1	1	1	1	1	1	1	1	1	0	0	0	0
		NGA	4	MEAN	0.618544	1	1	1	1	1	1	1	1	1	1	0.956406	1	1	1	1	1	1	1	0	0	0	0
		NIC	7	MEAN	0.891399	1	1	1	1	1	1	1	1	0.893659	1	0.860148	1	1	1	1	1	1	1	0	0	0	1.27924
		NLD	1	MEAN	1	1	1	0.821719	0.802067	1	1	1	1	1	1	1	1	1	1	1	1	1	1	0.135119	1.86544	0.873083	1.39621
		NOR	1	MEAN	1	1	1	0.94568	0.669863	1	1	1	1	0.930116	1	1	1	1	1	1	1	1	1	0.165526	1.21561	0.74893	1.12065
		NPL	6	MEAN	0.694872	1	1	1	1	1	1	1	1	1	1	0.800229	1	0.444929	1	1	1	1	1	0	0	0	0
		NZL	2	MEAN	1	1	1	0.654245	0.74153	1	1	1	1	0.938611	1	1	1	1	1	1	1	1	1	0.191283	1.7442	0.879367	1.8883
		PAK	6	MEAN	1	1	1	1	0.822318	1	1	1	1	0.912427	1	0.99026	1	0.890348	1	1	1	1	1	0	0.541134	0	0.51117
		PAN	7	MEAN	0.51684	1	1	0.735959	0.566809	1	1	1	1	0.926624	1	1	1	0.469891	1	1	1	1	1	0	0	0	0.6902
		PER	7	MEAN	0.653791	1	0.963282	0.962458	0.905351	1	1	1	1	1	1	0.97787	1	1	1	1	1	1	1	0	0	0	0.217598
		PHL	6	MEAN	0.295748	1	0.55731	0.572226	0.489981	0.989812	1	1	1	0.66457	1	0.706682	1	0.753458	1	1	0.872757	1	1	0	0.000684716	0	0.267725
		POL	1	MEAN	1	1	1	1	0.747109	1	1	1	1	1	1	1	1	1	1	1	1	1	1	0.162113	1.26208	0.679687	1.37461
		PRT	1	MEAN	1	1	1	0.850466	0.813109	1	1	1	1	1	1	1	1	1	1	1	1	1	1	0.482898	1.12479	0.950516	0.488935
		PRY	7	MEAN	0.776458	1	1	0.712007	0.945451	1	1	0.987806	1	1	1	1	1	0.848926	1	1	1	1	1	0	0.119897	0.00485254	0.375658
		PSE	5	MEAN	1	1	1	1	1	1	1	1	1	1	1	1	1	1	1	1	1	1	1	0.200879	1.15349	0.80725	1.52898
		ROU	1	MEAN	1	1	1	0.815772	0.830101	0.983524	1	1	1	1	1	1	1	1	1	1	1	1	1	0	0.550728	0.335054	0.26291
		RUS	1	MEAN	1	1	1	0.803734	0.6365	1	1	1	1	0.93424	1	0.977517	1	1	1	1	1	1	1	0	0.415635	0.299327	1.71918
		RWA	4	MEAN	0.588468	1	0.486123	1	1	1	1	0.953995	1	1	1	0.916452	1	1	1	1	1	0.980506	1	0	0	0	0
		SAU	5	MEAN	0.639394	1	1	1	0.743765	1	1	1	1	1	1	1	1	1	1	1	1	1	1	0	0.467118	0.280397	0.707061
		SDN	4	MEAN	1	1	1	0.935261	0.787071	1	1	0.879324	1	1	1	1	1	1	1	1	1	1	1	0	0	0	0.336381
		SEN	4	MEAN	0.377356	1	1	0.811855	0.662531	1	1	1	1	0.72306	1	0.696066	1	1	1	1	1	1	1	0	0	0	0
		SLV	7	MEAN	0.756188	1	1	1	0.973175	1	1	1	1	0.918941	1	0.844952	1	0.607351	1	1	1	1	1	0	0	0	1.1607
		SRB	1	MEAN	0.915382	1	1	0.789614	0.770378	0.80689	1	0.837001	1	0.741871	1	0.757905	1	0.666612	0.982094	1	1	1	1	0	0	0	0.522654
		SUR	7	MEAN	0.410743	1	1	0.599374	0.420212	0.914595	0.89184	1	1	0.717795	1	0.690564	0.820488	0.362496	1	1	1	1	1	0	0	0	1.62425
		SVK	1	MEAN	0.809274	1	1	0.621821	0.556811	0.903058	1	0.844518	1	0.702103	1	0.848453	1	0.987774	0.967464	1	1	1	1	0.0963483	0.508846	0.42471	1.53899
		SVN	1	MEAN	1	1	1	0.771483	0.642007	1	1	1	1	0.831813	1	1	1	0.978313	1	1	1	1	1	0.0179823	0.825055	0.550641	0.354583
		SWE	1	MEAN	1	1	1	0.779794	0.649908	0.952374	1	1	1	0.886844	1	1	1	1	1	1	1	1	1	0.264428	1.76988	0.878331	1.11538
		SWZ	4	MEAN	0.3937	1	0.928982	0.930114	0.487053	1	1	0.882296	1	0.724799	1	0.792841	1	0.35358	1	1	1	1	1	0	0	0	0.756585
		THA	6	MEAN	0.446559	1	1	0.569756	0.579933	1	1	1	1	0.637705	1	0.721578	1	1	1	1	0.874732	1	1	0	0	0	1.39416
		TJK	5	MEAN	0.533627	1	1	0.683755	0.527587	0.734983	0.932384	0.683198	0.924624	0.644053	1	0.501618	0.736776	1	0.684988	1	0.884619	0.896702	1	0	0	0	0
		TTO	7	MEAN	0.255948	1	1	0.808144	0.729119	1	1	1	1	0.735671	1	0.628584	0.927878	0.366727	1	1	1	1	1	0	0.221568	0.106807	2.0295
		TUN	5	MEAN	0.8901	1	1	1	1	1	1	1	1	1	1	0.986912	1	1	1	1	1	1	1	0	0.0480396	0.10751	0.900423
		TUR	5	MEAN	1	1	1	1	1	1	1	1	1	1	1	1	1	1	1	1	1	1	1	0.0111445	0.705783	0.640617	0.643311
		TZA	4	MEAN	0.772655	1	1	1	1	1	1	1	1	1	1	0.976832	1	1	1	1	1	1	1	0	0	0	0
		UKR	1	MEAN	1	1	1	0.859348	0.717781	1	1	1	1	1	1	0.980551	1	1	1	1	1	1	1	0	0.215396	0.172047	1.52687
		URY	7	MEAN	1	1	1	0.74108	0.670602	1	1	1	1	1	1	1	1	1	1	1	1	1	1	0	0.574419	0.00742994	0.907269
		USA	2	MEAN	1	1	1	0.645888	0.698634	1	1	1	1	0.86559	1	1	1	0.968165	1	1	1	1	1	0.410996	1.32104	1.29443	2.19547
		UZB	5	MEAN	0.962899	1	1	0.802167	0.662154	0.946866	1	0.905438	1	0.916894	1	0.754337	0.933574	1	1	1	1	1	1	0	0.00148108	0	0
		VCT	7	MEAN	0.467153	1	1	0.914878	0.701762	1	1	1	1	1	1	0.883948	1	0.826932	1	1	1	1	1	0	0.325336	0.143545	1.34088
		ZAF	4	MEAN	0.519785	1	1	1	0.680749	1	1	1	1	0.93389	1	1	1	1	1	1	1	1	1	0	0	0	0.840886
		ZWE	4	MEAN	0.335002	1	1	1	0.51395	1	1	0.8949	1	0.638532	1	0.724418	1	0.56232	1	0.850278	1	1	1	0	0	0	0.324552

## Sheet: Table S3
		Table S3 Disease risks associated with different dietary scenarios and current diets.
		ISO3	Region Code	Age groups	Diet	T2D	Stroke	Mortality	CHD	CDC	average RR		Mean:average RR										Note: The MEAN column is a weighted result based on age groups. The parameter "α" reflects the preference for minimizing transition barriers; a larger value of "α" indicates a greater emphasis on reducing these barriers during optimization. Specifically, α = 0 represents a health-oriented strategy (HOS), while α = 1 corresponds to an easy-to-transition strategy (ETS). Additionally, the average RR…
		AGO	4	Age0-5	current diet	1.22771	0.702159	0.719792	0.675912	1.05943	0.877		diet scenario	Age0-5	Age11-19	Age20-44	Age45-59	Age60+	Age6-10	MEAN	Average
		ALB	1	Age0-5	current diet	0.915918	0.683576	0.798745	0.719703	0.688041	0.761197		1	0.627372	0.654145	0.642782	0.636058	0.633915	0.639373	0.613412	0.635294
		ARE	5	Age0-5	current diet	0.770023	0.767726	0.601324	0.604308	0.761515	0.700979		current diet	0.795842	0.977471	0.932345	0.864636	0.833755	0.872351	0.875748	0.878878
		ARG	7	Age0-5	current diet	1.12931	0.772468	0.9165	0.876618	0.815712	0.902122		α=0.0; ETS	0.652027	0.697823	0.659065	0.65751	0.77144	0.681553	0.640883	0.680043
		ARM	1	Age0-5	current diet	0.723521	0.684983	0.657516	0.666745	0.701073	0.686767		α=0.1	0.638035	0.6699	0.655173	0.653628	0.661523	0.658333	0.624744	0.651619
		ATG	7	Age0-5	current diet	0.948419	0.701261	0.747467	0.724059	0.744529	0.773147		α=0.2	0.628103	0.663661	0.646056	0.640545	0.634473	0.639557	0.611084	0.63764
		AUS	2	Age0-5	current diet	1.02186	0.720785	0.867413	0.804225	0.619367	0.806731		α=0.3	0.63327	0.650786	0.639211	0.645533	0.64293	0.64127	0.613205	0.638029
		AUT	1	Age0-5	current diet	0.862726	0.681414	0.823506	0.741576	0.652325	0.752309		α=0.4	0.61229	0.631118	0.620224	0.617262	0.603489	0.616882	0.591656	0.613274
		AZE	1	Age0-5	current diet	0.756981	0.694732	0.596269	0.639112	0.699733	0.677366		α=0.5	0.607701	0.614982	0.611088	0.607221	0.587528	0.615417	0.581023	0.603566
		BEL	1	Age0-5	current diet	1.07968	0.717806	0.881863	0.830507	0.710882	0.844148		α=0.6	0.604162	0.616745	0.609169	0.612586	0.602612	0.606839	0.579822	0.604562
		BEN	4	Age0-5	current diet	1.23893	0.873338	0.693483	0.737592	1.04816	0.918302		α=0.7	0.6054	0.608343	0.613073	0.609805	0.593838	0.611737	0.582777	0.603567
		BFA	4	Age0-5	current diet	0.777755	0.884251	0.656632	0.680735	0.774427	0.75476		α=0.8	0.600867	0.597068	0.60137	0.59916	0.574762	0.598177	0.571675	0.591868
		BGD	6	Age0-5	current diet	0.844402	0.856539	0.859195	0.821941	0.921962	0.860808		α=0.9	0.587727	0.579805	0.586348	0.593803	0.566586	0.581404	0.561786	0.579637
		BGR	1	Age0-5	current diet	0.990263	0.792083	0.829395	0.771939	0.823209	0.841378		α=1.0; HOS	0.563036	0.542037	0.540261	0.531001	0.53405	0.548955	0.526545	0.540841
		BHS	7	Age0-5	current diet	1.03264	0.706628	0.756485	0.754445	0.872522	0.824543		2	0.642558	0.667312	0.704419	0.652586	0.627432	0.640488	0.640928	0.653675
		BIH	1	Age0-5	current diet	0.924128	0.724991	0.797159	0.72719	0.788146	0.792323		current diet	0.807388	1.02924	1.01949	0.940563	0.893472	0.906933	0.943823	0.934416
		BLR	1	Age0-5	current diet	1.06173	0.730458	0.793125	0.774344	0.852867	0.842506		α=0.0; ETS	0.658354	0.836051	0.810562	0.738795	0.80995	0.724079	0.736898	0.759241
		BLZ	7	Age0-5	current diet	0.766161	0.685017	0.655004	0.622361	0.773647	0.700438		α=0.1	0.647344	0.684745	0.740596	0.687416	0.558588	0.670819	0.652532	0.663149
		BOL	7	Age0-5	current diet	1.07817	0.748754	0.74893	0.688827	0.901769	0.833291		α=0.2	0.651751	0.654648	0.755512	0.670674	0.585962	0.616587	0.648433	0.654795
		BRA	7	Age0-5	current diet	1.03801	0.719875	0.802291	0.721159	0.804963	0.817259		α=0.3	0.625523	0.657545	0.721461	0.637361	0.546478	0.59422	0.623835	0.629489
		BRB	7	Age0-5	current diet	1.06058	0.695891	0.724069	0.68765	0.858415	0.805321		α=0.4	0.653663	0.6063	0.675338	0.633165	0.629166	0.641809	0.616358	0.636543
		BRN	6	Age0-5	current diet	1.07018	0.689742	0.759957	0.730629	0.866154	0.823332		α=0.5	0.610358	0.592944	0.661842	0.594102	0.552859	0.572158	0.587977	0.596034
		BWA	4	Age0-5	current diet	0.826408	0.80109	0.76747	0.699231	0.834351	0.78571		α=0.6	0.631149	0.593071	0.645013	0.600198	0.601178	0.618919	0.593735	0.611894
		CAF	4	Age0-5	current diet	1.22421	0.826028	0.806289	0.761848	1.10947	0.94557		α=0.7	0.641015	0.607003	0.655216	0.611571	0.620354	0.641638	0.605236	0.626005
		CAN	2	Age0-5	current diet	0.951743	0.682254	0.770067	0.699165	0.688041	0.758254		α=0.8	0.599854	0.595988	0.608443	0.572084	0.58908	0.572479	0.566621	0.586364
		CHE	1	Age0-5	current diet	0.895733	0.702713	0.886319	0.81234	0.624	0.784221		α=0.9	0.592774	0.549326	0.59273	0.57823	0.56284	0.560447	0.558659	0.570715
		CHL	7	Age0-5	current diet	1.1006	0.743596	0.805113	0.758626	0.878734	0.857334		α=1.0; HOS	0.59152	0.600886	0.566827	0.566875	0.579258	0.565763	0.557029	0.575451
		CHN	3	Age0-5	current diet	1.12843	0.661268	0.714844	0.606558	0.912648	0.804749		3	0.667289	0.718418	0.754336	0.698372	0.661159	0.684966	0.688436	0.696139
		CIV	4	Age0-5	current diet	1.27337	0.763751	0.767686	0.704601	1.13389	0.928659		current diet	0.808244	1.03474	0.960036	0.87464	0.830234	0.931118	0.905053	0.906295
		CMR	4	Age0-5	current diet	0.918773	0.705246	0.64108	0.574687	0.875015	0.74296		α=0.0; ETS	0.779845	0.82619	0.920827	0.796563	0.792391	0.906614	0.824459	0.83527
		COG	4	Age0-5	current diet	1.40474	0.806202	0.814465	0.805877	1.098	0.985857		α=0.1	0.716471	0.848646	0.799159	0.797355	0.703697	0.793664	0.755343	0.773476
		COL	7	Age0-5	current diet	1.04	0.754125	0.814429	0.778426	0.898417	0.85708		α=0.2	0.683432	0.755135	0.842193	0.761679	0.689389	0.673844	0.734006	0.73424
		CPV	4	Age0-5	current diet	0.800777	0.736407	0.727283	0.690784	0.806708	0.752392		α=0.3	0.677235	0.73959	0.813116	0.746147	0.674059	0.680975	0.720895	0.721717
		CRI	7	Age0-5	current diet	0.815975	0.7051	0.774655	0.712295	0.735978	0.748801		α=0.4	0.674161	0.705754	0.796009	0.728694	0.701508	0.73671	0.718727	0.72308
		CYP	1	Age0-5	current diet	0.928586	0.704932	0.761113	0.698607	0.723113	0.76327		α=0.5	0.648692	0.714898	0.780371	0.688667	0.645408	0.620308	0.682886	0.683033
		CZE	1	Age0-5	current diet	1.03869	0.773684	0.812465	0.75448	0.841686	0.844201		α=0.6	0.610109	0.661399	0.678743	0.639747	0.64302	0.595588	0.625518	0.636303
		DEU	1	Age0-5	current diet	0.896107	0.717859	0.88884	0.821398	0.639075	0.792656		α=0.7	0.623348	0.657304	0.685808	0.658819	0.623051	0.593662	0.624998	0.638141
		DJI	4	Age0-5	current diet	0.88749	0.849341	0.915969	0.862225	0.900613	0.883128		α=0.8	0.601529	0.567851	0.630579	0.577808	0.565048	0.56023	0.578173	0.583031
		DMA	7	Age0-5	current diet	1.04885	0.692818	0.766957	0.729321	0.802688	0.808126		α=0.9	0.606732	0.559811	0.59925	0.582189	0.539969	0.568222	0.559575	0.573678
		DNK	1	Age0-5	current diet	0.802634	0.703946	0.985327	0.971219	0.503566	0.793339		α=1.0; HOS	0.577666	0.549695	0.545941	0.528163	0.526137	0.558657	0.531601	0.545409
		DOM	7	Age0-5	current diet	0.973409	0.73674	0.79431	0.76164	0.881106	0.829441		4	0.671604	0.714418	0.720255	0.681162	0.641945	0.689926	0.687439	0.686678
		DZA	5	Age0-5	current diet	0.933133	0.736161	0.811946	0.75074	0.903353	0.827067		current diet	0.833502	0.928815	0.865967	0.828669	0.845853	0.893775	0.867453	0.866291
		ECU	7	Age0-5	current diet	0.909842	0.734017	0.833287	0.763311	0.767615	0.801614		α=0.0; ETS	0.720339	0.832887	0.784345	0.763437	0.785278	0.782754	0.759931	0.775567
		EGY	5	Age0-5	current diet	0.997609	0.724696	0.837215	0.788151	0.83247	0.836028		α=0.1	0.696732	0.787565	0.782675	0.745335	0.699471	0.760443	0.743647	0.745124
		ESP	1	Age0-5	current diet	1.01412	0.681941	0.756439	0.679248	0.745773	0.775504		α=0.2	0.695771	0.766393	0.775847	0.730657	0.669227	0.747066	0.731161	0.730875
		EST	1	Age0-5	current diet	1.0106	0.753406	0.85837	0.814966	0.771185	0.841706		α=0.3	0.681115	0.752996	0.75421	0.709103	0.641772	0.727318	0.71553	0.71172
		ETH	4	Age0-5	current diet	0.801847	0.838187	0.664235	0.691279	0.784657	0.756041		α=0.4	0.67133	0.727735	0.737615	0.692808	0.606246	0.685574	0.697067	0.688339
		FIN	1	Age0-5	current diet	0.804827	0.707949	0.894769	0.855133	0.572878	0.767111		α=0.5	0.662149	0.71415	0.732376	0.668023	0.619456	0.668451	0.687558	0.67888
		FJI	2	Age0-5	current diet	1.16762	0.740891	0.804054	0.74002	0.894412	0.869399		α=0.6	0.655722	0.668624	0.710165	0.661448	0.60634	0.651008	0.666379	0.659955
		FRA	1	Age0-5	current diet	0.984669	0.712635	0.939674	0.869824	0.632447	0.82785		α=0.7	0.642217	0.656015	0.692423	0.641864	0.58715	0.628451	0.649683	0.642543
		GBR	1	Age0-5	current diet	0.969806	0.686129	0.798465	0.73599	0.711465	0.780371		α=0.8	0.625582	0.624766	0.665959	0.612422	0.57229	0.604004	0.621031	0.618008
		GEO	1	Age0-5	current diet	0.761172	0.748327	0.626862	0.650311	0.707858	0.698906		α=0.9	0.604363	0.583763	0.612168	0.584446	0.549675	0.586368	0.581923	0.586101
		GHA	4	Age0-5	current diet	1.29845	0.707065	0.711525	0.645623	1.19277	0.911086		α=1.0; HOS	0.570431	0.529307	0.529313	0.535725	0.520581	0.543896	0.527901	0.536736
		GIN	4	Age0-5	current diet	0.98701	0.748258	0.795951	0.698199	0.941463	0.834176		5	0.63173	0.629883	0.634443	0.605018	0.60268	0.618909	0.610428	0.619013
		GMB	4	Age0-5	current diet	0.786424	0.813829	0.790252	0.776708	0.816402	0.796723		current diet	0.770472	0.897125	0.833886	0.77985	0.77914	0.816801	0.800273	0.811078
		GNB	4	Age0-5	current diet	0.934157	0.825052	0.857361	0.773984	0.919336	0.861978		α=0.0; ETS	0.670523	0.695599	0.661598	0.651046	0.743005	0.675298	0.650625	0.678242
		GRC	1	Age0-5	current diet	0.915926	0.66125	0.813207	0.706756	0.632672	0.745962		α=0.1	0.652367	0.658861	0.654994	0.638305	0.600191	0.654401	0.634459	0.64194
		GRD	7	Age0-5	current diet	0.919627	0.740343	0.7616	0.760769	0.915068	0.819481		α=0.2	0.640347	0.64454	0.656535	0.613336	0.602446	0.629032	0.627483	0.630531
		GUY	7	Age0-5	current diet	0.991797	0.744329	0.80411	0.778577	0.794594	0.822681		α=0.3	0.640091	0.614704	0.636907	0.598342	0.580893	0.609319	0.606165	0.612346
		HND	7	Age0-5	current diet	0.740684	0.735886	0.591748	0.688866	0.662351	0.683907		α=0.4	0.624146	0.614144	0.629926	0.591119	0.585994	0.606818	0.602816	0.607852
		HRV	1	Age0-5	current diet	1.00406	0.733177	0.810404	0.729163	0.796368	0.814635		α=0.5	0.632876	0.616445	0.626315	0.594263	0.586954	0.602621	0.60303	0.608929
		HTI	7	Age0-5	current diet	1.08422	0.819018	0.846461	0.769289	0.971988	0.898196		α=0.6	0.61722	0.604327	0.614163	0.588136	0.572095	0.595858	0.590803	0.597515
		HUN	1	Age0-5	current diet	1.07163	0.78092	0.823895	0.787477	0.879953	0.868775		α=0.7	0.601227	0.569405	0.602525	0.582412	0.558119	0.584053	0.574846	0.581798
		IDN	6	Age0-5	current diet	0.99358	0.701362	0.815557	0.784416	0.88364	0.835711		α=0.8	0.585396	0.563208	0.592944	0.563118	0.559383	0.57138	0.564317	0.571392
		IND	6	Age0-5	current diet	0.735614	0.749592	0.6046	0.669586	0.699233	0.691725		α=0.9	0.580328	0.550379	0.565568	0.535009	0.533603	0.545662	0.546144	0.550956
		IRL	1	Age0-5	current diet	0.946298	0.715569	1.10064	1.04474	0.508638	0.863176		α=1.0; HOS	0.565761	0.529859	0.537959	0.525278	0.530336	0.535661	0.524181	0.535577
		IRN	6	Age0-5	current diet	0.823305	0.644465	0.547962	0.566096	0.728183	0.662002		6	0.655424	0.657892	0.691857	0.645078	0.616513	0.642677	0.642664	0.650301
		IRQ	5	Age0-5	current diet	0.743777	0.793007	0.662362	0.750288	0.820506	0.753988		current diet	0.788394	0.851658	0.817759	0.786436	0.780161	0.822998	0.807482	0.807841
		ISL	1	Age0-5	current diet	0.947102	0.696661	0.854756	0.797945	0.651248	0.789542		α=0.0; ETS	0.685875	0.764638	0.787844	0.725767	0.769451	0.738783	0.732132	0.743498
		ISR	5	Age0-5	current diet	1.06082	0.68792	0.716943	0.668542	0.746312	0.776107		α=0.1	0.67546	0.72717	0.761003	0.694459	0.636202	0.700917	0.693382	0.69837
		ITA	1	Age0-5	current diet	0.936527	0.672003	0.827593	0.727219	0.67551	0.76777		α=0.2	0.66829	0.701389	0.748532	0.679514	0.63516	0.670417	0.676434	0.68282
		JAM	7	Age0-5	current diet	1.03831	0.705475	0.752415	0.731409	0.795382	0.804597		α=0.3	0.657916	0.667078	0.738487	0.672979	0.619256	0.628149	0.66388	0.663964
		JOR	5	Age0-5	current diet	0.825746	0.725215	0.601913	0.65352	0.753495	0.711978		α=0.4	0.663988	0.654931	0.727371	0.655928	0.607856	0.642471	0.653044	0.657941
		JPN	3	Age0-5	current diet	1.07415	0.704886	0.765387	0.704543	0.859436	0.82168		α=0.5	0.656753	0.646717	0.687487	0.62358	0.573527	0.619945	0.628509	0.633788
		KAZ	5	Age0-5	current diet	1.0262	0.718815	0.812945	0.742927	0.791334	0.818445		α=0.6	0.629397	0.60521	0.661745	0.627804	0.581213	0.608636	0.60787	0.617411
		KEN	4	Age0-5	current diet	0.821998	0.756261	0.70528	0.645623	0.813317	0.748496		α=0.7	0.624652	0.599934	0.63998	0.602882	0.564666	0.587446	0.593198	0.601823
		KGZ	5	Age0-5	current diet	1.07054	0.786413	0.89643	0.827678	0.848721	0.885955		α=0.8	0.61039	0.570184	0.613038	0.573161	0.550556	0.5756	0.573958	0.580984
		KOR	3	Age0-5	current diet	1.04282	0.689952	0.747974	0.664598	0.846177	0.798304		α=0.9	0.607067	0.555286	0.576964	0.568286	0.54207	0.565844	0.551975	0.566784
		KWT	5	Age0-5	current diet	0.784962	0.639467	0.60419	0.600558	0.750379	0.675911		α=1.0; HOS	0.596908	0.550512	0.542072	0.530134	0.538039	0.550914	0.530102	0.548383
		LAO	6	Age0-5	current diet	1.00227	0.72295	0.8469	0.807425	0.879671	0.851844		7	0.648861	0.671945	0.677417	0.63982	0.628941	0.651365	0.640061	0.651201
		LCA	7	Age0-5	current diet	1.07064	0.779277	0.825516	0.828624	0.892529	0.879317		current diet	0.810282	0.986213	0.877272	0.828444	0.873345	0.899309	0.874365	0.878461
		LKA	6	Age0-5	current diet	0.91789	0.800256	0.848828	0.807872	0.900814	0.855132		α=0.0; ETS	0.709353	0.789741	0.787351	0.740964	0.795197	0.789234	0.746901	0.765534
		LTU	1	Age0-5	current diet	1.00773	0.770198	0.934015	0.89937	0.692826	0.860827		α=0.1	0.692668	0.741838	0.739082	0.69686	0.655697	0.703266	0.696612	0.703717
		LUX	1	Age0-5	current diet	0.883559	0.70227	0.908266	0.851967	0.623498	0.793912		α=0.2	0.670856	0.703336	0.726413	0.677659	0.632272	0.661404	0.671657	0.677657
		LVA	1	Age0-5	current diet	0.971304	0.746927	0.774196	0.743173	0.812804	0.809681		α=0.3	0.649123	0.662009	0.701404	0.651231	0.603343	0.630653	0.642288	0.648579
		MAR	5	Age0-5	current diet	0.880478	0.731089	0.758916	0.724313	0.843502	0.78766		α=0.4	0.6331	0.63624	0.656568	0.612711	0.575028	0.611036	0.607567	0.618893
		MDA	1	Age0-5	current diet	0.967879	0.786025	0.820746	0.789728	0.86275	0.845426		α=0.5	0.629475	0.629674	0.656593	0.601441	0.582264	0.616504	0.607127	0.617583
		MDG	4	Age0-5	current diet	1.11142	0.844786	0.927441	0.885967	1.04657	0.963238		α=0.6	0.613253	0.608051	0.623927	0.596609	0.572777	0.586562	0.588101	0.598469
		MDV	6	Age0-5	current diet	0.793875	0.640129	0.504756	0.570023	0.703136	0.642384		α=0.7	0.612363	0.597449	0.615085	0.582554	0.579562	0.595347	0.580369	0.594675
		MEX	7	Age0-5	current diet	0.83193	0.692823	0.511806	0.634456	0.690077	0.672218		α=0.8	0.58959	0.579748	0.596566	0.570095	0.559481	0.575832	0.564449	0.576537
		MKD	1	Age0-5	current diet	0.95858	0.701503	0.731166	0.671102	0.7871	0.76989		α=0.9	0.586033	0.567032	0.583017	0.564765	0.552094	0.574582	0.553913	0.568777
		MLI	4	Age0-5	current diet	0.799748	0.801507	0.827545	0.803468	0.770562	0.800566		α=1.0; HOS	0.590232	0.562007	0.565728	0.554509	0.566231	0.572653	0.547379	0.565534
		MLT	1	Age0-5	current diet	0.986265	0.679803	0.746173	0.672891	0.772237	0.771474		Average	0.646082	0.670225	0.675136	0.645744	0.629544	0.651736	0.640096	0.651223
		MNE	1	Age0-5	current diet	0.946667	0.695122	0.812202	0.719239	0.723557	0.779357
		MNG	5	Age0-5	current diet	1.06507	0.855242	0.905121	0.787822	0.868456	0.896342
		MOZ	4	Age0-5	current diet	1.13044	0.825525	0.771012	0.762225	1.08199	0.914238
		MRT	4	Age0-5	current diet	0.85454	0.884224	0.954529	0.900565	0.858377	0.890447
		MUS	6	Age0-5	current diet	0.90297	0.752725	0.817568	0.823608	0.851007	0.829575
		MWI	4	Age0-5	current diet	1.02506	0.754705	0.618772	0.640772	0.930489	0.793959
		MYS	6	Age0-5	current diet	0.983597	0.702807	0.772807	0.764711	0.871728	0.81913
		NAM	4	Age0-5	current diet	0.979197	0.834051	0.801055	0.777758	0.940308	0.866474
		NER	4	Age0-5	current diet	0.784292	0.868306	0.774709	0.75136	0.776972	0.791128
		NGA	4	Age0-5	current diet	1.10092	0.730997	0.700727	0.671472	1.04457	0.849737
		NIC	7	Age0-5	current diet	0.758244	0.759181	0.61977	0.664076	0.669136	0.694081
		NLD	1	Age0-5	current diet	0.900613	0.689324	1.02255	0.967292	0.557458	0.827447
		NOR	1	Age0-5	current diet	0.816049	0.679023	0.818533	0.746161	0.63913	0.739779
		NPL	6	Age0-5	current diet	0.857197	0.807844	0.585552	0.715895	0.762029	0.745703
		NZL	2	Age0-5	current diet	0.992066	0.733733	0.918507	0.857992	0.623296	0.825119
		PAK	6	Age0-5	current diet	0.767292	0.817653	0.595613	0.772899	0.629414	0.716574
		PAN	7	Age0-5	current diet	0.877559	0.775226	0.767909	0.712775	0.810214	0.788736
		PER	7	Age0-5	current diet	1.09156	0.722953	0.802651	0.762399	1.00055	0.876023
		PHL	6	Age0-5	current diet	1.01905	0.710191	0.845322	0.785981	0.873475	0.846805
		POL	1	Age0-5	current diet	0.991835	0.75366	0.810466	0.759732	0.806443	0.824427
		PRT	1	Age0-5	current diet	0.916602	0.671606	0.786166	0.715003	0.682208	0.754317
		PRY	7	Age0-5	current diet	1.11388	0.758608	0.801867	0.708167	1.0432	0.885145
		PSE	5	Age0-5	current diet	0.869833	0.619966	0.615238	0.546435	0.669754	0.664245
		ROU	1	Age0-5	current diet	1.03923	0.73153	0.846157	0.779841	0.826038	0.844559
		RUS	1	Age0-5	current diet	1.10925	0.753491	0.815842	0.766195	0.88852	0.86666
		RWA	4	Age0-5	current diet	1.26637	0.755959	0.812906	0.757113	1.16446	0.951362
		SAU	5	Age0-5	current diet	0.748981	0.727204	0.645384	0.682091	0.718437	0.704419
		SDN	4	Age0-5	current diet	0.800048	0.756002	0.81082	0.689735	0.731534	0.757628
		SEN	4	Age0-5	current diet	0.784384	0.779954	0.745814	0.691969	0.820054	0.764435
		SLV	7	Age0-5	current diet	0.769864	0.725042	0.561034	0.663541	0.710287	0.685953
		SRB	1	Age0-5	current diet	0.828858	0.714047	0.752941	0.671516	0.775655	0.748603
		SUR	7	Age0-5	current diet	1.05748	0.789247	0.86108	0.847386	0.868136	0.884667
		SVK	1	Age0-5	current diet	1.01844	0.78203	0.808921	0.765316	0.878929	0.850727
		SVN	1	Age0-5	current diet	0.973306	0.719858	0.785937	0.699822	0.776545	0.791094
		SWE	1	Age0-5	current diet	0.852318	0.696279	0.857101	0.786869	0.634003	0.765314
		SWZ	4	Age0-5	current diet	0.801184	0.773277	0.719751	0.67255	0.816903	0.756733
		THA	6	Age0-5	current diet	1.03866	0.715671	0.834266	0.785716	0.909603	0.856784
		TJK	5	Age0-5	current diet	0.904614	0.803839	0.836367	0.791164	0.873103	0.841817
		TTO	7	Age0-5	current diet	1.06951	0.75137	0.791907	0.758576	0.857133	0.845699
		TUN	5	Age0-5	current diet	0.864847	0.704171	0.748807	0.67962	0.799074	0.759304
		TUR	5	Age0-5	current diet	0.781997	0.637723	0.551168	0.570514	0.645163	0.637313
		TZA	4	Age0-5	current diet	0.914618	0.742297	0.64294	0.586568	0.880303	0.753345
		UKR	1	Age0-5	current diet	1.07982	0.743407	0.792306	0.769467	0.918704	0.860742
		URY	7	Age0-5	current diet	0.977959	0.731527	0.915972	0.851945	0.762344	0.84795
		USA	2	Age0-5	current diet	0.965034	0.695711	0.808466	0.763072	0.654895	0.777436
		UZB	5	Age0-5	current diet	0.928641	0.74346	0.837364	0.757462	0.83542	0.82047
		VCT	7	Age0-5	current diet	1.097	0.720185	0.78892	0.774489	0.874423	0.851004
		ZAF	4	Age0-5	current diet	0.838645	0.768254	0.697142	0.717654	0.78192	0.760723
		ZWE	4	Age0-5	current diet	0.761997	0.816224	0.678838	0.677857	0.773629	0.741709
		AGO	4	Age6-10	current diet	1.42748	0.64999	0.712262	0.63146	1.25659	0.935557
		ALB	1	Age6-10	current diet	1.15245	0.681192	0.923865	0.87578	0.6299	0.852638
		ARE	5	Age6-10	current diet	0.916044	0.716675	0.515468	0.581407	0.625399	0.670999
		ARG	7	Age6-10	current diet	1.64787	0.747994	1.21532	1.39359	0.802411	1.16144
		ARM	1	Age6-10	current diet	0.926253	0.660012	0.54732	0.666325	0.595563	0.679095
		ATG	7	Age6-10	current diet	1.14371	0.620359	0.821743	0.727229	0.651893	0.792987
		AUS	2	Age6-10	current diet	1.35657	0.726177	0.919018	0.856201	0.643508	0.900294
		AUT	1	Age6-10	current diet	1.14289	0.68655	0.862994	0.788509	0.688705	0.833929
		AZE	1	Age6-10	current diet	0.974007	0.666753	0.470766	0.630984	0.62033	0.672568
		BEL	1	Age6-10	current diet	1.50338	0.716511	0.957496	0.931606	0.770289	0.975856
		BEN	4	Age6-10	current diet	1.47693	0.846399	0.737514	0.882302	1.34899	1.05843
		BFA	4	Age6-10	current diet	1.00284	0.891989	0.65679	0.804617	0.696554	0.810559
		BGD	6	Age6-10	current diet	0.963734	0.76436	0.939486	0.95893	0.896595	0.904621
		BGR	1	Age6-10	current diet	1.21648	0.752444	0.926914	0.911921	0.772281	0.916008
		BHS	7	Age6-10	current diet	1.37925	0.665455	0.863339	0.811324	0.849079	0.91369
		BIH	1	Age6-10	current diet	1.05835	0.670561	0.854569	0.826953	0.727305	0.827547
		BLR	1	Age6-10	current diet	1.60568	0.703716	0.841006	0.88668	0.84559	0.976535
		BLZ	7	Age6-10	current diet	0.935347	0.620198	0.625625	0.640866	0.697178	0.703843
		BOL	7	Age6-10	current diet	1.46127	0.677697	0.829466	0.866736	0.917511	0.950537
		BRA	7	Age6-10	current diet	1.53147	0.66857	0.966879	0.991222	0.813594	0.994347
		BRB	7	Age6-10	current diet	1.33903	0.609963	0.772596	0.727518	0.811989	0.85222
		BRN	6	Age6-10	current diet	1.39059	0.633338	0.884044	0.901371	0.835855	0.92904
		BWA	4	Age6-10	current diet	1.10504	0.717244	0.755249	0.811684	0.796842	0.837212
		CAF	4	Age6-10	current diet	1.52084	0.774253	0.837104	0.653876	1.5207	1.06135
		CAN	2	Age6-10	current diet	1.2263	0.673421	0.790756	0.703623	0.716609	0.822142
		CHE	1	Age6-10	current diet	1.13564	0.704023	0.914909	0.841941	0.640537	0.84741
		CHL	7	Age6-10	current diet	1.50394	0.671098	0.950367	0.981493	0.847293	0.990838
		CHN	3	Age6-10	current diet	1.63162	0.672371	0.825769	0.769311	0.965799	0.972973
		CIV	4	Age6-10	current diet	1.45653	0.698399	0.861018	0.763758	1.55885	1.06771
		CMR	4	Age6-10	current diet	1.33469	0.642453	0.621287	0.65614	0.953472	0.841608
		COG	4	Age6-10	current diet	1.68252	0.726456	0.905479	0.761073	1.46914	1.10893
		COL	7	Age6-10	current diet	1.42077	0.700345	0.912902	0.914686	0.91028	0.971798
		CPV	4	Age6-10	current diet	1.00974	0.633894	0.677003	0.760221	0.706082	0.757389
		CRI	7	Age6-10	current diet	1.02215	0.654311	0.838507	0.824764	0.662095	0.800366
		CYP	1	Age6-10	current diet	1.13077	0.68973	0.762466	0.680467	0.72433	0.797553
		CZE	1	Age6-10	current diet	1.36212	0.752592	0.908476	0.852474	0.820712	0.939276
		DEU	1	Age6-10	current diet	1.17527	0.717764	0.921761	0.854796	0.674925	0.868902
		DJI	4	Age6-10	current diet	0.944681	0.770544	1.02277	0.86155	0.821168	0.884142
		DMA	7	Age6-10	current diet	1.68213	0.661038	0.895377	0.91132	0.862391	1.00245
		DNK	1	Age6-10	current diet	1.03349	0.688978	1.00906	1.00392	0.508829	0.848857
		DOM	7	Age6-10	current diet	1.24884	0.685191	0.863899	0.84095	0.85588	0.898951
		DZA	5	Age6-10	current diet	1.08297	0.643184	0.839049	0.830628	0.818448	0.842856
		ECU	7	Age6-10	current diet	1.12531	0.695166	0.959711	0.912528	0.709467	0.880436
		EGY	5	Age6-10	current diet	1.2128	0.640581	0.940377	0.801301	0.731299	0.865271
		ESP	1	Age6-10	current diet	1.33343	0.671472	0.77898	0.679371	0.78816	0.850282
		EST	1	Age6-10	current diet	1.31749	0.723044	0.958792	0.948619	0.732835	0.936157
		ETH	4	Age6-10	current diet	1.05964	0.797516	0.605144	0.776755	0.779176	0.803646
		FIN	1	Age6-10	current diet	1.02876	0.687219	0.893612	0.845019	0.583809	0.807683
		FJI	2	Age6-10	current diet	1.66262	0.699335	0.878947	0.911493	0.966709	1.02382
		FRA	1	Age6-10	current diet	1.30436	0.703358	1.00734	0.938488	0.660987	0.922907
		GBR	1	Age6-10	current diet	1.28479	0.671659	0.837813	0.771614	0.756985	0.864573
		GEO	1	Age6-10	current diet	0.960046	0.713983	0.48561	0.642631	0.607673	0.681989
		GHA	4	Age6-10	current diet	1.37133	0.66583	0.774838	0.655439	1.71435	1.03636
		GIN	4	Age6-10	current diet	1.32485	0.658438	0.883046	0.807681	1.04266	0.943334
		GMB	4	Age6-10	current diet	0.934466	0.728247	0.834016	0.777108	0.710196	0.796807
		GNB	4	Age6-10	current diet	1.2019	0.741074	0.95539	0.868348	0.968109	0.946964
		GRC	1	Age6-10	current diet	1.19268	0.667695	0.859971	0.750024	0.667965	0.827667
		GRD	7	Age6-10	current diet	1.12198	0.646566	0.779893	0.723557	0.865923	0.827584
		GUY	7	Age6-10	current diet	1.18745	0.631924	0.867788	0.869722	0.70233	0.851844
		HND	7	Age6-10	current diet	0.85828	0.671031	0.532988	0.668398	0.565323	0.659204
		HRV	1	Age6-10	current diet	1.33736	0.728454	0.920779	0.857172	0.77172	0.923096
		HTI	7	Age6-10	current diet	1.45041	0.74263	0.877027	0.842981	1.04444	0.991498
		HUN	1	Age6-10	current diet	1.41248	0.753104	0.913853	0.850978	0.864344	0.958952
		IDN	6	Age6-10	current diet	1.28242	0.643855	0.892112	0.81247	0.917918	0.909755
		IND	6	Age6-10	current diet	0.816318	0.663642	0.545957	0.620261	0.63073	0.655382
		IRL	1	Age6-10	current diet	1.2689	0.711091	1.18028	1.14004	0.537016	0.967464
		IRN	6	Age6-10	current diet	1.01713	0.585057	0.42756	0.503265	0.611123	0.628827
		IRQ	5	Age6-10	current diet	0.836423	0.702004	0.514691	0.679661	0.696441	0.685844
		ISL	1	Age6-10	current diet	1.23325	0.684086	0.875877	0.82128	0.673412	0.857581
		ISR	5	Age6-10	current diet	1.40603	0.622282	0.883769	0.853002	0.654044	0.883826
		ITA	1	Age6-10	current diet	1.20962	0.666623	0.888794	0.806257	0.698147	0.853888
		JAM	7	Age6-10	current diet	1.38513	0.615088	0.835395	0.847887	0.761705	0.889042
		JOR	5	Age6-10	current diet	1.0148	0.632422	0.465935	0.571715	0.629447	0.662865
		JPN	3	Age6-10	current diet	1.40636	0.668387	0.831773	0.747054	0.846767	0.900069
		KAZ	5	Age6-10	current diet	1.38589	0.702235	0.937468	0.92191	0.786129	0.946726
		KEN	4	Age6-10	current diet	1.03759	0.661854	0.627742	0.674548	0.757518	0.751851
		KGZ	5	Age6-10	current diet	1.41336	0.758324	1.08206	1.14608	0.84997	1.04996
		KOR	3	Age6-10	current diet	1.39268	0.683821	0.831044	0.848172	0.845846	0.920313
		KWT	5	Age6-10	current diet	1.08403	0.57617	0.586057	0.59889	0.635019	0.696032
		LAO	6	Age6-10	current diet	1.25906	0.67924	0.940257	0.804484	0.889369	0.914481
		LCA	7	Age6-10	current diet	1.37849	0.680909	0.950035	0.915671	0.84133	0.953288
		LKA	6	Age6-10	current diet	1.0284	0.699224	0.87117	0.951359	0.840044	0.878039
		LTU	1	Age6-10	current diet	1.36213	0.731495	1.00523	1.01056	0.677965	0.957476
		LUX	1	Age6-10	current diet	1.16505	0.705471	0.987562	0.949832	0.651016	0.891787
		LVA	1	Age6-10	current diet	1.31521	0.716347	0.803071	0.816243	0.763265	0.882827
		MAR	5	Age6-10	current diet	1.09667	0.622264	0.744086	0.781994	0.7228	0.793562
		MDA	1	Age6-10	current diet	1.14325	0.728233	0.880322	0.877561	0.810413	0.887957
		MDG	4	Age6-10	current diet	1.53643	0.76074	1.09714	1.00358	1.23223	1.12602
		MDV	6	Age6-10	current diet	0.93875	0.550729	0.423071	0.511376	0.650339	0.614853
		MEX	7	Age6-10	current diet	1.11815	0.653971	0.484511	0.616913	0.621283	0.698965
		MKD	1	Age6-10	current diet	1.15369	0.662546	0.772173	0.712344	0.736728	0.807497
		MLI	4	Age6-10	current diet	1.05907	0.712359	0.87991	0.79097	0.672784	0.823019
		MLT	1	Age6-10	current diet	1.31766	0.676293	0.801366	0.757046	0.803359	0.871144
		MNE	1	Age6-10	current diet	1.30029	0.705011	0.966836	0.913796	0.690699	0.915327
		MNG	5	Age6-10	current diet	1.44268	0.864723	1.11959	1.06534	0.909637	1.08039
		MOZ	4	Age6-10	current diet	1.38733	0.756801	0.760571	0.762822	1.35858	1.00522
		MRT	4	Age6-10	current diet	0.980402	0.807093	1.08274	0.957769	0.767648	0.919131
		MUS	6	Age6-10	current diet	1.03959	0.624975	0.878398	0.77526	0.752349	0.814114
		MWI	4	Age6-10	current diet	1.37269	0.700778	0.536036	0.62807	1.02545	0.852606
		MYS	6	Age6-10	current diet	1.21019	0.639056	0.85702	0.903744	0.836281	0.889259
		NAM	4	Age6-10	current diet	1.53743	0.74448	0.79521	0.839648	1.0171	0.986774
		NER	4	Age6-10	current diet	0.887732	0.793185	0.855007	0.738352	0.678107	0.790477
		NGA	4	Age6-10	current diet	1.37187	0.653532	0.72278	0.703158	1.31879	0.954027
		NIC	7	Age6-10	current diet	0.903264	0.684798	0.56567	0.66397	0.573192	0.678179
		NLD	1	Age6-10	current diet	1.2171	0.690265	1.07056	0.99118	0.598887	0.913598
		NOR	1	Age6-10	current diet	1.0273	0.658509	0.82956	0.744815	0.650238	0.782085
		NPL	6	Age6-10	current diet	1.04606	0.754553	0.570193	0.736034	0.756006	0.772569
		NZL	2	Age6-10	current diet	1.33741	0.740708	0.982809	0.944921	0.656553	0.932479
		PAK	6	Age6-10	current diet	0.882246	0.777861	0.54471	0.762456	0.573339	0.708122
		PAN	7	Age6-10	current diet	1.2722	0.726338	0.869122	0.996951	0.787449	0.930411
		PER	7	Age6-10	current diet	1.45157	0.643209	0.860488	0.926043	1.03634	0.983531
		PHL	6	Age6-10	current diet	1.33166	0.66781	0.936095	0.887437	0.874697	0.93954
		POL	1	Age6-10	current diet	1.38499	0.731345	0.885988	0.912861	0.778025	0.938641
		PRT	1	Age6-10	current diet	1.17172	0.652414	0.825946	0.740452	0.699759	0.818059
		PRY	7	Age6-10	current diet	2.0046	0.728594	0.950813	0.832914	1.27925	1.15923
		PSE	5	Age6-10	current diet	1.97626	0.799885	0.721675	0.666688	0.534324	0.939767
		ROU	1	Age6-10	current diet	1.35999	0.701077	0.992439	1.01126	0.809823	0.974918
		RUS	1	Age6-10	current diet	1.52699	0.723389	0.932428	0.94241	0.88346	1.00174
		RWA	4	Age6-10	current diet	1.19019	0.672775	0.776322	0.630466	1.40738	0.935428
		SAU	5	Age6-10	current diet	0.875303	0.611652	0.540773	0.603294	0.570938	0.640392
		SDN	4	Age6-10	current diet	0.847143	0.678166	0.886646	0.752924	0.642964	0.761568
		SEN	4	Age6-10	current diet	0.931662	0.67794	0.739177	0.699334	0.72055	0.753733
		SLV	7	Age6-10	current diet	0.913942	0.650606	0.470338	0.601078	0.631755	0.653544
		SRB	1	Age6-10	current diet	1.04352	0.684041	0.819704	0.717906	0.73677	0.800389
		SUR	7	Age6-10	current diet	1.31629	0.699833	0.967651	1.01064	0.802368	0.959355
		SVK	1	Age6-10	current diet	1.28601	0.749324	0.879053	0.840348	0.84804	0.920554
		SVN	1	Age6-10	current diet	1.24951	0.6927	0.889253	0.809541	0.743168	0.876833
		SWE	1	Age6-10	current diet	1.09051	0.686055	0.869445	0.787319	0.65828	0.818322
		SWZ	4	Age6-10	current diet	1.07064	0.692025	0.668449	0.787008	0.769238	0.797472
		THA	6	Age6-10	current diet	1.34408	0.685286	0.917771	0.964814	0.904925	0.963376
		TJK	5	Age6-10	current diet	0.977216	0.747204	0.88899	0.896946	0.823023	0.866676
		TTO	7	Age6-10	current diet	1.3456	0.658142	0.882411	0.899573	0.801477	0.91744
		TUN	5	Age6-10	current diet	0.973467	0.612169	0.756853	0.721033	0.685271	0.749759
		TUR	5	Age6-10	current diet	0.97046	0.60166	0.428823	0.523806	0.533313	0.611612
		TZA	4	Age6-10	current diet	1.27866	0.668176	0.585188	0.605239	0.914076	0.810267
		UKR	1	Age6-10	current diet	1.43434	0.703485	0.867558	0.906523	0.905796	0.96354
		URY	7	Age6-10	current diet	1.33579	0.693758	1.17197	1.17427	0.711458	1.01745
		USA	2	Age6-10	current diet	1.25774	0.691926	0.85614	0.79686	0.676966	0.855927
		UZB	5	Age6-10	current diet	1.08444	0.708353	0.97028	0.919397	0.812952	0.899085
		VCT	7	Age6-10	current diet	1.58392	0.642585	0.94671	0.92917	0.875151	0.995507
		ZAF	4	Age6-10	current diet	1.11781	0.672579	0.660675	0.83124	0.67789	0.792039
		ZWE	4	Age6-10	current diet	0.964095	0.753646	0.592542	0.794752	0.681906	0.757388
		AGO	4	Age11-19	current diet	1.60263	0.647194	0.726322	0.657985	1.37558	1.00194
		ALB	1	Age11-19	current diet	1.37506	0.70022	1.00455	1.04534	0.632022	0.951439
		ARE	5	Age11-19	current diet	1.04689	0.714475	0.493238	0.639347	0.559465	0.690684
		ARG	7	Age11-19	current diet	2.10899	0.763167	1.46137	1.76317	0.85701	1.39074
		ARM	1	Age11-19	current diet	1.13194	0.682681	0.508865	0.696381	0.57621	0.719216
		ATG	7	Age11-19	current diet	1.33216	0.596575	0.913536	0.801754	0.619841	0.852773
		AUS	2	Age11-19	current diet	1.71123	0.751785	1.00141	1.02596	0.700591	1.0382
		AUT	1	Age11-19	current diet	1.44085	0.707569	0.913799	0.937142	0.755085	0.950888
		AZE	1	Age11-19	current diet	1.18611	0.677167	0.4475	0.649771	0.618738	0.715858
		BEL	1	Age11-19	current diet	1.93233	0.732439	1.02575	1.1464	0.843743	1.13613
		BEN	4	Age11-19	current diet	1.57227	0.847406	0.745535	0.865479	1.49636	1.10541
		BFA	4	Age11-19	current diet	1.14841	0.909901	0.649137	0.816498	0.682905	0.84137
		BGD	6	Age11-19	current diet	1.0664	0.71385	1.01894	0.901577	0.888043	0.917761
		BGR	1	Age11-19	current diet	1.42399	0.734594	1.01218	1.06228	0.777157	1.00204
		BHS	7	Age11-19	current diet	1.70376	0.663826	0.992633	0.959705	0.846866	1.03336
		BIH	1	Age11-19	current diet	1.19244	0.65066	0.887187	0.873512	0.713514	0.863462
		BLR	1	Age11-19	current diet	2.19909	0.707017	0.890275	1.04136	0.892338	1.14602
		BLZ	7	Age11-19	current diet	1.06945	0.600073	0.633499	0.705405	0.675568	0.736799
		BOL	7	Age11-19	current diet	1.78925	0.670367	0.919734	0.903564	0.94894	1.04637
		BRA	7	Age11-19	current diet	1.99679	0.655205	1.09755	1.16724	0.868923	1.15714
		BRB	7	Age11-19	current diet	1.57661	0.589581	0.831644	0.810003	0.796159	0.9208
		BRN	6	Age11-19	current diet	1.62632	0.616971	0.98819	0.912245	0.815696	0.991885
		BWA	4	Age11-19	current diet	1.36599	0.706274	0.746928	0.855926	0.811597	0.897342
		CAF	4	Age11-19	current diet	1.69798	0.772993	0.874422	0.671269	1.7939	1.16211
		CAN	2	Age11-19	current diet	1.50467	0.684517	0.834057	0.776809	0.765114	0.913033
		CHE	1	Age11-19	current diet	1.3746	0.721154	0.942182	0.945223	0.684221	0.933477
		CHL	7	Age11-19	current diet	1.85184	0.656201	1.07197	1.06096	0.862606	1.10072
		CHN	3	Age11-19	current diet	2.05896	0.702749	0.923498	0.837764	1.01837	1.10827
		CIV	4	Age11-19	current diet	1.58383	0.693277	0.894719	0.732253	1.79434	1.13968
		CMR	4	Age11-19	current diet	1.4483	0.645722	0.609792	0.632434	1.01174	0.869598
		COG	4	Age11-19	current diet	1.80454	0.704509	0.97255	0.779304	1.68193	1.18857
		COL	7	Age11-19	current diet	1.75294	0.693412	1.00004	1.14119	0.954897	1.1085
		CPV	4	Age11-19	current diet	1.19906	0.618419	0.660109	0.759197	0.690827	0.785522
		CRI	7	Age11-19	current diet	1.19842	0.640747	0.873555	0.919648	0.660659	0.858605
		CYP	1	Age11-19	current diet	1.33629	0.695546	0.788463	0.725591	0.752614	0.8597
		CZE	1	Age11-19	current diet	1.6956	0.75373	1.00958	1.0951	0.859686	1.08274
		DEU	1	Age11-19	current diet	1.46329	0.734178	0.957804	0.974732	0.737288	0.973458
		DJI	4	Age11-19	current diet	1.00767	0.750693	1.01584	0.815784	0.783008	0.874599
		DMA	7	Age11-19	current diet	1.98731	0.659624	1.00744	1.08872	0.936446	1.13591
		DNK	1	Age11-19	current diet	1.26794	0.6871	1.02312	1.09205	0.546461	0.923336
		DOM	7	Age11-19	current diet	1.48802	0.673734	0.943627	0.971621	0.868861	0.989172
		DZA	5	Age11-19	current diet	1.21342	0.624216	0.82331	0.774007	0.767819	0.840554
		ECU	7	Age11-19	current diet	1.32122	0.68705	1.0469	1.06816	0.720264	0.96872
		EGY	5	Age11-19	current diet	1.38914	0.630815	1.0151	0.741451	0.692151	0.893733
		ESP	1	Age11-19	current diet	1.66984	0.683479	0.828748	0.76384	0.854409	0.960063
		EST	1	Age11-19	current diet	1.64687	0.710564	1.01554	1.14228	0.751037	1.05326
		ETH	4	Age11-19	current diet	1.20549	0.774263	0.610861	0.867879	0.82001	0.855701
		FIN	1	Age11-19	current diet	1.25671	0.679093	0.894144	0.8851	0.625037	0.868017
		FJI	2	Age11-19	current diet	2.01958	0.688193	0.940569	1.04059	1.02986	1.14376
		FRA	1	Age11-19	current diet	1.63173	0.707948	1.06884	1.11992	0.719861	1.04966
		GBR	1	Age11-19	current diet	1.59922	0.671958	0.885731	0.882693	0.819458	0.971813
		GEO	1	Age11-19	current diet	1.13496	0.710365	0.443179	0.657858	0.591154	0.707503
		GHA	4	Age11-19	current diet	1.49502	0.677698	0.805244	0.717353	1.9826	1.13558
		GIN	4	Age11-19	current diet	1.5008	0.637784	0.897197	0.758415	1.10628	0.980095
		GMB	4	Age11-19	current diet	1.03592	0.704779	0.812229	0.759294	0.667717	0.795988
		GNB	4	Age11-19	current diet	1.41786	0.715028	0.960607	0.847798	1.00373	0.989005
		GRC	1	Age11-19	current diet	1.48677	0.696031	0.91107	0.907618	0.726746	0.945647
		GRD	7	Age11-19	current diet	1.30182	0.614312	0.829786	0.757671	0.848875	0.870494
		GUY	7	Age11-19	current diet	1.34065	0.593709	0.922205	0.823223	0.674285	0.870814
		HND	7	Age11-19	current diet	0.941718	0.650709	0.531533	0.678799	0.544152	0.669382
		HRV	1	Age11-19	current diet	1.53546	0.728325	0.975963	1.03355	0.783892	1.01144
		HTI	7	Age11-19	current diet	1.72295	0.706767	0.883023	0.896811	1.09072	1.06005
		HUN	1	Age11-19	current diet	1.74263	0.747696	1.01601	1.01075	0.900174	1.08345
		IDN	6	Age11-19	current diet	1.49832	0.627104	0.94634	0.823426	0.951731	0.969384
		IND	6	Age11-19	current diet	0.853686	0.623794	0.529599	0.652376	0.609362	0.653763
		IRL	1	Age11-19	current diet	1.58578	0.715832	1.22165	1.32874	0.59897	1.09019
		IRN	6	Age11-19	current diet	1.22132	0.608155	0.40245	0.513784	0.569934	0.663128
		IRQ	5	Age11-19	current diet	0.913005	0.685934	0.464161	0.666111	0.638239	0.67349
		ISL	1	Age11-19	current diet	1.51601	0.685562	0.909329	0.91043	0.725627	0.949392
		ISR	5	Age11-19	current diet	1.74565	0.636869	1.07941	0.916314	0.612942	0.998237
		ITA	1	Age11-19	current diet	1.49367	0.679964	0.94555	0.994058	0.746832	0.972015
		JAM	7	Age11-19	current diet	1.70152	0.590083	0.91564	0.940327	0.763932	0.9823
		JOR	5	Age11-19	current diet	1.17198	0.616277	0.434057	0.550247	0.580135	0.67054
		JPN	3	Age11-19	current diet	1.64399	0.666012	0.892168	0.841476	0.864107	0.98155
		KAZ	5	Age11-19	current diet	1.77775	0.717945	1.03762	1.24484	0.835649	1.12276
		KEN	4	Age11-19	current diet	1.21172	0.636997	0.581399	0.747215	0.758867	0.787239
		KGZ	5	Age11-19	current diet	1.72003	0.756602	1.19209	1.21762	0.886178	1.1545
		KOR	3	Age11-19	current diet	1.66355	0.703376	0.912255	0.920728	0.872136	1.01441
		KWT	5	Age11-19	current diet	1.42495	0.581332	0.620237	0.70303	0.57579	0.781068
		LAO	6	Age11-19	current diet	1.45742	0.673391	1.00662	0.786062	0.906519	0.966002
		LCA	7	Age11-19	current diet	1.65965	0.646978	1.07355	1.03503	0.814347	1.04591
		LKA	6	Age11-19	current diet	1.08398	0.644769	0.901193	0.866759	0.813428	0.862026
		LTU	1	Age11-19	current diet	1.75282	0.718809	1.06621	1.27791	0.699946	1.10314
		LUX	1	Age11-19	current diet	1.44492	0.715817	1.05633	1.1448	0.704388	1.01325
		LVA	1	Age11-19	current diet	1.72191	0.712162	0.836353	0.982258	0.773608	1.00526
		MAR	5	Age11-19	current diet	1.28685	0.594373	0.728046	0.732309	0.661134	0.800543
		MDA	1	Age11-19	current diet	1.30948	0.698953	0.917757	1.00924	0.802071	0.947499
		MDG	4	Age11-19	current diet	1.60466	0.731317	1.13361	0.938244	1.33113	1.14779
		MDV	6	Age11-19	current diet	1.01706	0.507307	0.403914	0.496098	0.631813	0.611238
		MEX	7	Age11-19	current diet	1.34896	0.65084	0.511837	0.649456	0.613938	0.755006
		MKD	1	Age11-19	current diet	1.31288	0.656126	0.807867	0.811432	0.730548	0.863771
		MLI	4	Age11-19	current diet	1.24903	0.691365	0.863581	0.77024	0.657091	0.84626
		MLT	1	Age11-19	current diet	1.65774	0.698466	0.868428	0.971472	0.853961	1.01001
		MNE	1	Age11-19	current diet	1.66425	0.741042	1.09651	1.27776	0.722701	1.10045
		MNG	5	Age11-19	current diet	1.83564	0.897443	1.31934	1.55416	1.02177	1.32567
		MOZ	4	Age11-19	current diet	1.4623	0.730594	0.729099	0.781064	1.50099	1.04081
		MRT	4	Age11-19	current diet	1.10504	0.784126	1.07824	0.943002	0.74227	0.930535
		MUS	6	Age11-19	current diet	1.15494	0.582684	0.888329	0.72124	0.713258	0.812091
		MWI	4	Age11-19	current diet	1.45548	0.686697	0.506426	0.654397	1.09874	0.880347
		MYS	6	Age11-19	current diet	1.36248	0.616706	0.930342	0.89276	0.818196	0.924097
		NAM	4	Age11-19	current diet	1.71011	0.719563	0.790596	0.887697	1.08132	1.03786
		NER	4	Age11-19	current diet	0.951909	0.734449	0.816417	0.728395	0.643253	0.774885
		NGA	4	Age11-19	current diet	1.45764	0.644301	0.716284	0.660838	1.47226	0.990265
		NIC	7	Age11-19	current diet	0.9956	0.647594	0.544275	0.690959	0.554415	0.686569
		NLD	1	Age11-19	current diet	1.55268	0.704506	1.10446	1.06411	0.663515	1.01785
		NOR	1	Age11-19	current diet	1.24142	0.653123	0.843782	0.801681	0.686045	0.84521
		NPL	6	Age11-19	current diet	1.18776	0.740987	0.591029	0.872339	0.76506	0.831436
		NZL	2	Age11-19	current diet	1.695	0.763315	1.06537	1.15933	0.726446	1.08189
		PAK	6	Age11-19	current diet	0.930367	0.745409	0.519219	0.716708	0.561414	0.694624
		PAN	7	Age11-19	current diet	1.62592	0.731054	0.995209	1.2647	0.838369	1.09105
		PER	7	Age11-19	current diet	1.7166	0.621699	0.899662	0.883798	1.06971	1.03829
		PHL	6	Age11-19	current diet	1.56127	0.657292	1.00559	0.898492	0.892061	1.00294
		POL	1	Age11-19	current diet	1.85018	0.737685	0.949977	1.24258	0.814546	1.119
		PRT	1	Age11-19	current diet	1.43536	0.650919	0.877216	0.854268	0.743902	0.912334
		PRY	7	Age11-19	current diet	2.38033	0.743832	1.06683	1.04148	1.47521	1.34154
		PSE	5	Age11-19	current diet	3.81791	1.04875	0.87979	0.933527	0.471339	1.43026
		ROU	1	Age11-19	current diet	1.66975	0.69786	1.09767	1.17467	0.84064	1.09612
		RUS	1	Age11-19	current diet	1.93854	0.718786	1.03699	1.29406	0.921837	1.18204
		RWA	4	Age11-19	current diet	1.16195	0.627629	0.748573	0.61005	1.53898	0.937435
		SAU	5	Age11-19	current diet	0.997836	0.578957	0.513421	0.593547	0.50964	0.63868
		SDN	4	Age11-19	current diet	0.921718	0.668702	0.878938	0.722433	0.624404	0.763239
		SEN	4	Age11-19	current diet	1.04659	0.652257	0.708851	0.659814	0.687188	0.75094
		SLV	7	Age11-19	current diet	1.00804	0.622975	0.451163	0.584399	0.615135	0.656343
		SRB	1	Age11-19	current diet	1.24712	0.682914	0.872201	0.850573	0.746816	0.879925
		SUR	7	Age11-19	current diet	1.50363	0.670648	1.04788	1.00091	0.779348	1.00048
		SVK	1	Age11-19	current diet	1.52686	0.742285	0.946059	1.01934	0.862806	1.01947
		SVN	1	Age11-19	current diet	1.53098	0.691639	0.99029	1.11006	0.773786	1.01935
		SWE	1	Age11-19	current diet	1.34076	0.691936	0.888738	0.856547	0.710065	0.897609
		SWZ	4	Age11-19	current diet	1.29987	0.683562	0.647572	0.816143	0.775384	0.844506
		THA	6	Age11-19	current diet	1.55776	0.679204	0.978648	0.982171	0.916378	1.02283
		TJK	5	Age11-19	current diet	1.05037	0.728987	0.922441	0.885521	0.803133	0.87809
		TTO	7	Age11-19	current diet	1.57393	0.624409	0.961389	0.882984	0.772146	0.962972
		TUN	5	Age11-19	current diet	1.1018	0.599361	0.761418	0.655538	0.635733	0.750769
		TUR	5	Age11-19	current diet	1.1623	0.633626	0.396045	0.522058	0.503869	0.64358
		TZA	4	Age11-19	current diet	1.34168	0.65258	0.549348	0.63719	0.945774	0.825314
		UKR	1	Age11-19	current diet	1.7974	0.693475	0.934196	1.04883	0.919717	1.07872
		URY	7	Age11-19	current diet	1.63739	0.691455	1.3267	1.28233	0.731974	1.13397
		USA	2	Age11-19	current diet	1.56796	0.709612	0.931439	0.916414	0.72117	0.969319
		UZB	5	Age11-19	current diet	1.25447	0.714687	1.06691	0.921641	0.832063	0.957954
		VCT	7	Age11-19	current diet	2.02111	0.621237	1.08969	1.07298	0.87201	1.13541
		ZAF	4	Age11-19	current diet	1.36345	0.652305	0.661975	0.849909	0.658881	0.837304
		ZWE	4	Age11-19	current diet	1.11514	0.740618	0.573008	0.782547	0.668756	0.776013
		AGO	4	Age20-44	current diet	1.56574	0.652499	0.658106	0.594969	1.21188	0.936638
		ALB	1	Age20-44	current diet	1.33596	0.693141	0.882001	0.875782	0.663205	0.890017
		ARE	5	Age20-44	current diet	0.977274	0.769367	0.449539	0.632654	0.552807	0.676328
		ARG	7	Age20-44	current diet	1.73744	0.736257	1.11036	1.2166	0.87157	1.13445
		ARM	1	Age20-44	current diet	1.14523	0.68809	0.46649	0.610153	0.592124	0.700416
		ATG	7	Age20-44	current diet	1.18634	0.602008	0.791375	0.680024	0.646418	0.781234
		AUS	2	Age20-44	current diet	1.82113	0.727096	0.961107	1.01569	0.752487	1.0555
		AUT	1	Age20-44	current diet	1.53943	0.695411	0.871091	0.930504	0.811517	0.96959
		AZE	1	Age20-44	current diet	1.16615	0.675799	0.417973	0.594899	0.630276	0.697019
		BEL	1	Age20-44	current diet	2.07181	0.710879	0.970578	1.07625	0.888689	1.14364
		BEN	4	Age20-44	current diet	1.49717	0.857866	0.643691	0.723803	1.24449	0.993404
		BFA	4	Age20-44	current diet	1.03505	0.94874	0.567987	0.854212	0.696209	0.82044
		BGD	6	Age20-44	current diet	1.0488	0.718739	1.01309	0.909071	0.896128	0.917165
		BGR	1	Age20-44	current diet	1.30451	0.687406	0.889692	0.92296	0.795888	0.920091
		BHS	7	Age20-44	current diet	1.44459	0.655519	0.851287	0.790288	0.82534	0.913405
		BIH	1	Age20-44	current diet	1.13607	0.642338	0.794513	0.776511	0.73084	0.816054
		BLR	1	Age20-44	current diet	2.05108	0.667233	0.764714	0.834377	0.92276	1.04803
		BLZ	7	Age20-44	current diet	0.967056	0.608464	0.577536	0.577878	0.682171	0.682621
		BOL	7	Age20-44	current diet	1.52574	0.702392	0.791506	0.810687	0.927064	0.951478
		BRA	7	Age20-44	current diet	1.59195	0.646582	0.872994	0.831873	0.844178	0.957515
		BRB	7	Age20-44	current diet	1.37207	0.603105	0.714536	0.645869	0.793081	0.825733
		BRN	6	Age20-44	current diet	1.43991	0.604999	0.902413	0.840374	0.814961	0.920532
		BWA	4	Age20-44	current diet	1.21958	0.725498	0.68345	0.682434	0.802797	0.822752
		CAF	4	Age20-44	current diet	1.69561	0.776595	0.806707	0.678316	1.52367	1.09618
		CAN	2	Age20-44	current diet	1.56761	0.659392	0.793038	0.727717	0.794412	0.908434
		CHE	1	Age20-44	current diet	1.42856	0.693685	0.866311	0.87316	0.728511	0.918046
		CHL	7	Age20-44	current diet	1.55995	0.651125	0.861944	0.907415	0.867577	0.969601
		CHN	3	Age20-44	current diet	1.85048	0.707423	0.854551	0.781947	0.99739	1.03836
		CIV	4	Age20-44	current diet	1.501	0.698504	0.743929	0.621994	1.4888	1.01084
		CMR	4	Age20-44	current diet	1.39709	0.67389	0.551246	0.534337	0.909932	0.813299
		COG	4	Age20-44	current diet	1.78594	0.708471	0.841005	0.686065	1.3957	1.08344
		COL	7	Age20-44	current diet	1.46696	0.689627	0.858582	0.837325	0.936111	0.957721
		CPV	4	Age20-44	current diet	1.12498	0.638646	0.608824	0.636808	0.713006	0.744453
		CRI	7	Age20-44	current diet	1.05372	0.631209	0.738516	0.692164	0.690555	0.761233
		CYP	1	Age20-44	current diet	1.39621	0.674754	0.762616	0.704511	0.774669	0.862552
		CZE	1	Age20-44	current diet	1.54879	0.694332	0.877032	0.869005	0.881611	0.974155
		DEU	1	Age20-44	current diet	1.53031	0.699882	0.881483	0.907723	0.789355	0.961751
		DJI	4	Age20-44	current diet	0.937743	0.776868	0.870006	0.851776	0.800465	0.847371
		DMA	7	Age20-44	current diet	1.72418	0.650783	0.84328	0.838739	0.867507	0.984898
		DNK	1	Age20-44	current diet	1.32225	0.642074	0.895815	0.927419	0.594463	0.876405
		DOM	7	Age20-44	current diet	1.29249	0.68119	0.845051	0.800959	0.863685	0.896675
		DZA	5	Age20-44	current diet	1.0472	0.6104	0.698043	0.696749	0.730214	0.756522
		ECU	7	Age20-44	current diet	1.17239	0.672645	0.861979	0.782337	0.749412	0.847753
		EGY	5	Age20-44	current diet	1.16097	0.62392	0.862344	0.672798	0.687225	0.801452
		ESP	1	Age20-44	current diet	1.79626	0.672763	0.808756	0.761653	0.897079	0.987301
		EST	1	Age20-44	current diet	1.52314	0.658295	0.853661	0.872585	0.78489	0.938514
		ETH	4	Age20-44	current diet	1.0646	0.791469	0.550457	0.653388	0.779897	0.767962
		FIN	1	Age20-44	current diet	1.30849	0.635277	0.799498	0.79068	0.665202	0.839829
		FJI	2	Age20-44	current diet	1.76444	0.673511	0.887315	0.986257	0.997947	1.06189
		FRA	1	Age20-44	current diet	1.7238	0.673846	0.991702	1.06827	0.774508	1.04643
		GBR	1	Age20-44	current diet	1.66586	0.642972	0.841749	0.834789	0.851436	0.967362
		GEO	1	Age20-44	current diet	1.08887	0.672031	0.405268	0.59293	0.603482	0.672516
		GHA	4	Age20-44	current diet	1.43753	0.67442	0.679408	0.575848	1.5992	0.993282
		GIN	4	Age20-44	current diet	1.28747	0.650793	0.751232	0.736122	1.0196	0.889043
		GMB	4	Age20-44	current diet	0.918805	0.735305	0.676641	0.79153	0.680991	0.760654
		GNB	4	Age20-44	current diet	1.183	0.727862	0.816937	0.831404	0.942957	0.900431
		GRC	1	Age20-44	current diet	1.62189	0.71316	0.870998	0.908231	0.776586	0.978174
		GRD	7	Age20-44	current diet	1.15984	0.619893	0.755374	0.682435	0.83938	0.811385
		GUY	7	Age20-44	current diet	1.19206	0.607862	0.787947	0.799497	0.690283	0.815529
		HND	7	Age20-44	current diet	0.882419	0.656085	0.499653	0.627114	0.575504	0.648155
		HRV	1	Age20-44	current diet	1.42502	0.675093	0.85506	0.817791	0.812807	0.917154
		HTI	7	Age20-44	current diet	1.45546	0.71107	0.802359	0.744398	1.01354	0.945365
		HUN	1	Age20-44	current diet	1.60448	0.702585	0.903381	0.84371	0.920288	0.994889
		IDN	6	Age20-44	current diet	1.33475	0.625992	0.886641	0.781298	0.917387	0.909213
		IND	6	Age20-44	current diet	0.833148	0.628856	0.518314	0.63645	0.622373	0.647828
		IRL	1	Age20-44	current diet	1.67416	0.684985	1.0835	1.18203	0.669871	1.05891
		IRN	6	Age20-44	current diet	1.144	0.644232	0.35875	0.482931	0.561586	0.638301
		IRQ	5	Age20-44	current diet	0.889067	0.703467	0.430664	0.646627	0.627111	0.659387
		ISL	1	Age20-44	current diet	1.5863	0.646286	0.851202	0.865158	0.772594	0.944308
		ISR	5	Age20-44	current diet	1.38923	0.662139	0.859302	0.801449	0.639734	0.870371
		ITA	1	Age20-44	current diet	1.61125	0.680696	0.904391	0.950655	0.791592	0.987717
		JAM	7	Age20-44	current diet	1.42055	0.595334	0.779119	0.740317	0.750008	0.857065
		JOR	5	Age20-44	current diet	1.0752	0.631692	0.379926	0.516302	0.573306	0.635286
		JPN	3	Age20-44	current diet	1.44909	0.652843	0.810592	0.723319	0.887013	0.904571
		KAZ	5	Age20-44	current diet	1.72919	0.708779	0.908831	0.975508	0.868403	1.03814
		KEN	4	Age20-44	current diet	1.12256	0.656818	0.547351	0.583117	0.772426	0.736455
		KGZ	5	Age20-44	current diet	1.64308	0.741101	1.05887	1.06106	0.91789	1.0844
		KOR	3	Age20-44	current diet	1.47567	0.688078	0.840488	0.820903	0.860753	0.937178
		KWT	5	Age20-44	current diet	1.23175	0.596518	0.489413	0.586396	0.56717	0.69425
		LAO	6	Age20-44	current diet	1.33974	0.675598	0.951633	0.763252	0.880483	0.922141
		LCA	7	Age20-44	current diet	1.42805	0.657309	0.931619	0.849723	0.81736	0.936811
		LKA	6	Age20-44	current diet	1.02937	0.645186	0.894033	0.856657	0.814953	0.84804
		LTU	1	Age20-44	current diet	1.60873	0.66484	0.93223	1.01014	0.69256	0.9817
		LUX	1	Age20-44	current diet	1.5391	0.692503	0.999977	1.12395	0.756958	1.0225
		LVA	1	Age20-44	current diet	1.60157	0.657757	0.719641	0.781142	0.791389	0.9103
		MAR	5	Age20-44	current diet	1.11396	0.586613	0.589067	0.669971	0.629963	0.717914
		MDA	1	Age20-44	current diet	1.22466	0.664135	0.81969	0.850008	0.817399	0.875178
		MDG	4	Age20-44	current diet	1.49757	0.743507	0.9282	0.938659	1.19658	1.0609
		MDV	6	Age20-44	current diet	0.976369	0.518894	0.398833	0.492574	0.634171	0.604168
		MEX	7	Age20-44	current diet	1.17969	0.63899	0.452057	0.573981	0.632546	0.695452
		MKD	1	Age20-44	current diet	1.25352	0.647552	0.732548	0.66608	0.749266	0.809794
		MLI	4	Age20-44	current diet	1.09416	0.711411	0.709351	0.779542	0.680433	0.794979
		MLT	1	Age20-44	current diet	1.77858	0.693236	0.857734	0.938269	0.875427	1.02865
		MNE	1	Age20-44	current diet	1.59077	0.72371	0.957053	0.976061	0.751556	0.99983
		MNG	5	Age20-44	current diet	1.72086	0.852234	1.18436	1.39436	1.04155	1.23867
		MOZ	4	Age20-44	current diet	1.40692	0.738202	0.649712	0.629496	1.29699	0.944264
		MRT	4	Age20-44	current diet	1.04092	0.818817	0.932706	0.988447	0.783605	0.9129
		MUS	6	Age20-44	current diet	1.05415	0.605406	0.75211	0.758415	0.729521	0.77992
		MWI	4	Age20-44	current diet	1.40728	0.700103	0.471112	0.560279	1.01995	0.831745
		MYS	6	Age20-44	current diet	1.22725	0.604086	0.855883	0.828982	0.812598	0.86576
		NAM	4	Age20-44	current diet	1.66914	0.736022	0.720084	0.752652	0.997638	0.975107
		NER	4	Age20-44	current diet	0.864754	0.820863	0.707557	0.753775	0.672615	0.763913
		NGA	4	Age20-44	current diet	1.36515	0.653155	0.602067	0.588547	1.25567	0.892918
		NIC	7	Age20-44	current diet	0.925835	0.658937	0.503125	0.581897	0.587994	0.651558
		NLD	1	Age20-44	current diet	1.66853	0.683435	0.994372	0.925906	0.728382	1.00013
		NOR	1	Age20-44	current diet	1.29161	0.61687	0.7732	0.734551	0.720078	0.827262
		NPL	6	Age20-44	current diet	1.15785	0.747537	0.584161	0.869374	0.770683	0.82592
		NZL	2	Age20-44	current diet	1.81186	0.733144	1.01362	1.14234	0.791081	1.09841
		PAK	6	Age20-44	current diet	0.905543	0.742841	0.49803	0.688703	0.58654	0.684332
		PAN	7	Age20-44	current diet	1.35121	0.716129	0.844936	0.941198	0.806592	0.932013
		PER	7	Age20-44	current diet	1.4646	0.625135	0.799304	0.838974	1.03043	0.951689
		PHL	6	Age20-44	current diet	1.39344	0.64112	0.935022	0.838344	0.864207	0.934426
		POL	1	Age20-44	current diet	1.72177	0.692151	0.813136	0.958553	0.834169	1.00396
		PRT	1	Age20-44	current diet	1.52087	0.633532	0.842001	0.832332	0.77658	0.921064
		PRY	7	Age20-44	current diet	2.04958	0.727698	0.883313	0.770377	1.31138	1.14847
		PSE	5	Age20-44	current diet	3.56869	1.08597	0.715816	0.735463	0.475935	1.31637
		ROU	1	Age20-44	current diet	1.56173	0.677332	0.949488	0.990949	0.871766	1.01025
		RUS	1	Age20-44	current diet	1.78718	0.667918	0.906605	0.98963	0.94141	1.05855
		RWA	4	Age20-44	current diet	1.17767	0.661837	0.729669	0.600184	1.42343	0.918558
		SAU	5	Age20-44	current diet	0.91788	0.590697	0.429461	0.550161	0.517471	0.601134
		SDN	4	Age20-44	current diet	0.887506	0.687939	0.763856	0.661288	0.663005	0.732719
		SEN	4	Age20-44	current diet	0.937367	0.677248	0.611056	0.686852	0.69884	0.722272
		SLV	7	Age20-44	current diet	0.932521	0.628984	0.439826	0.56359	0.629424	0.638869
		SRB	1	Age20-44	current diet	1.17032	0.659454	0.78714	0.70256	0.772226	0.818341
		SUR	7	Age20-44	current diet	1.33166	0.673883	0.913457	0.970169	0.775166	0.932866
		SVK	1	Age20-44	current diet	1.39911	0.691369	0.841637	0.818565	0.875167	0.925169
		SVN	1	Age20-44	current diet	1.41101	0.652361	0.858723	0.852269	0.797702	0.914414
		SWE	1	Age20-44	current diet	1.39894	0.660355	0.816535	0.7929	0.753239	0.884393
		SWZ	4	Age20-44	current diet	1.15823	0.695807	0.59071	0.648127	0.757506	0.770077
		THA	6	Age20-44	current diet	1.38224	0.652365	0.91415	0.898634	0.907004	0.950879
		TJK	5	Age20-44	current diet	1.00976	0.729136	0.864708	0.82727	0.799765	0.846127
		TTO	7	Age20-44	current diet	1.37196	0.632742	0.815982	0.774297	0.770352	0.873067
		TUN	5	Age20-44	current diet	0.963382	0.598732	0.631734	0.595168	0.629458	0.683695
		TUR	5	Age20-44	current diet	1.09675	0.667495	0.352068	0.483352	0.511308	0.622195
		TZA	4	Age20-44	current diet	1.31208	0.678898	0.515922	0.53576	0.895587	0.78765
		UKR	1	Age20-44	current diet	1.69344	0.659283	0.826208	0.823727	0.939823	0.988496
		URY	7	Age20-44	current diet	1.37431	0.665984	1.00066	1.01786	0.768833	0.965528
		USA	2	Age20-44	current diet	1.6598	0.681637	0.898688	0.87113	0.754842	0.973219
		UZB	5	Age20-44	current diet	1.25863	0.731764	0.978288	0.847711	0.852646	0.933807
		VCT	7	Age20-44	current diet	1.62743	0.624528	0.925722	0.846529	0.839502	0.972743
		ZAF	4	Age20-44	current diet	1.26724	0.667542	0.594084	0.758071	0.683555	0.794098
		ZWE	4	Age20-44	current diet	1.03798	0.756851	0.521607	0.642543	0.672209	0.726239
		AGO	4	Age45-59	current diet	1.49324	0.648927	0.635687	0.586442	1.12985	0.898829
		ALB	1	Age45-59	current diet	1.21796	0.682558	0.827328	0.746093	0.658813	0.82655
		ARE	5	Age45-59	current diet	0.915971	0.779908	0.413474	0.610178	0.54806	0.653518
		ARG	7	Age45-59	current diet	1.53806	0.720208	1.01306	1.01676	0.851289	1.02787
		ARM	1	Age45-59	current diet	1.07546	0.689855	0.437625	0.567307	0.584404	0.67093
		ATG	7	Age45-59	current diet	1.10768	0.602555	0.755224	0.655482	0.654117	0.755013
		AUS	2	Age45-59	current diet	1.68465	0.696971	0.890687	0.890037	0.743878	0.981244
		AUT	1	Age45-59	current diet	1.44708	0.673709	0.813229	0.82163	0.799409	0.911011
		AZE	1	Age45-59	current diet	1.10534	0.682945	0.40685	0.574895	0.62018	0.678042
		BEL	1	Age45-59	current diet	1.95319	0.68317	0.904078	0.913552	0.882071	1.06721
		BEN	4	Age45-59	current diet	1.45572	0.852751	0.616099	0.701382	1.13934	0.953057
		BFA	4	Age45-59	current diet	0.965361	0.938611	0.549937	0.742116	0.698032	0.778812
		BGD	6	Age45-59	current diet	1.02094	0.726984	1.02923	0.912579	0.887745	0.915496
		BGR	1	Age45-59	current diet	1.14639	0.666599	0.827658	0.845291	0.776989	0.852586
		BHS	7	Age45-59	current diet	1.31588	0.649008	0.805078	0.741882	0.815232	0.865417
		BIH	1	Age45-59	current diet	1.04337	0.639582	0.755559	0.738045	0.719542	0.77922
		BLR	1	Age45-59	current diet	1.80445	0.641861	0.672629	0.709966	0.870545	0.939889
		BLZ	7	Age45-59	current diet	0.896477	0.60434	0.559745	0.540656	0.681453	0.656534
		BOL	7	Age45-59	current diet	1.35958	0.694924	0.741046	0.703397	0.901234	0.880036
		BRA	7	Age45-59	current diet	1.41498	0.641761	0.81735	0.72381	0.823726	0.884325
		BRB	7	Age45-59	current diet	1.25753	0.594843	0.68359	0.600084	0.783912	0.783992
		BRN	6	Age45-59	current diet	1.22305	0.600531	0.799013	0.778816	0.817635	0.84381
		BWA	4	Age45-59	current diet	1.10654	0.725394	0.668797	0.642216	0.781416	0.784872
		CAF	4	Age45-59	current diet	1.62437	0.771473	0.776691	0.666614	1.36573	1.04098
		CAN	2	Age45-59	current diet	1.4552	0.635795	0.740081	0.644691	0.78631	0.852415
		CHE	1	Age45-59	current diet	1.32619	0.666059	0.807827	0.760891	0.721643	0.856522
		CHL	7	Age45-59	current diet	1.39644	0.644541	0.8085	0.772628	0.849789	0.89438
		CHN	3	Age45-59	current diet	1.59258	0.693367	0.780413	0.714835	0.95923	0.948085
		CIV	4	Age45-59	current diet	1.44764	0.695393	0.707741	0.598463	1.3523	0.960308
		CMR	4	Age45-59	current diet	1.27208	0.666291	0.532788	0.513848	0.857842	0.76857
		COG	4	Age45-59	current diet	1.73551	0.711573	0.801216	0.683893	1.27685	1.04181
		COL	7	Age45-59	current diet	1.31969	0.681391	0.81441	0.762759	0.916241	0.898897
		CPV	4	Age45-59	current diet	1.02498	0.640422	0.594375	0.601153	0.701427	0.712471
		CRI	7	Age45-59	current diet	0.968982	0.624845	0.706909	0.635792	0.691015	0.725508
		CYP	1	Age45-59	current diet	1.30966	0.652698	0.718018	0.640335	0.764785	0.817098
		CZE	1	Age45-59	current diet	1.31707	0.660495	0.792271	0.728827	0.84065	0.867862
		DEU	1	Age45-59	current diet	1.41823	0.667096	0.813664	0.788075	0.777894	0.892992
		DJI	4	Age45-59	current diet	0.901532	0.778941	0.839546	0.786944	0.807148	0.822822
		DMA	7	Age45-59	current diet	1.52698	0.642837	0.795515	0.785024	0.843841	0.91884
		DNK	1	Age45-59	current diet	1.24228	0.613533	0.816076	0.792996	0.586622	0.810301
		DOM	7	Age45-59	current diet	1.18921	0.679267	0.807303	0.751082	0.855231	0.856419
		DZA	5	Age45-59	current diet	0.946805	0.608758	0.631857	0.676749	0.702618	0.713357
		ECU	7	Age45-59	current diet	1.08615	0.670417	0.818033	0.724064	0.748303	0.809393
		EGY	5	Age45-59	current diet	1.01248	0.623208	0.783571	0.653326	0.68072	0.750661
		ESP	1	Age45-59	current diet	1.70094	0.656715	0.765027	0.694016	0.884451	0.94023
		EST	1	Age45-59	current diet	1.31547	0.632809	0.76995	0.756706	0.753088	0.845604
		ETH	4	Age45-59	current diet	0.986486	0.79505	0.534266	0.630208	0.750484	0.739299
		FIN	1	Age45-59	current diet	1.23029	0.606643	0.729398	0.700856	0.653066	0.78405
		FJI	2	Age45-59	current diet	1.50047	0.655619	0.821428	0.830757	0.965923	0.95484
		FRA	1	Age45-59	current diet	1.59948	0.647885	0.917978	0.91592	0.766437	0.96954
		GBR	1	Age45-59	current diet	1.55358	0.621593	0.786694	0.740789	0.842034	0.908938
		GEO	1	Age45-59	current diet	1.01473	0.662873	0.389994	0.569278	0.595856	0.646547
		GHA	4	Age45-59	current diet	1.38547	0.663764	0.645303	0.564771	1.43221	0.938304
		GIN	4	Age45-59	current diet	1.14371	0.653984	0.718044	0.666084	0.96991	0.830346
		GMB	4	Age45-59	current diet	0.86721	0.740749	0.655881	0.789419	0.693202	0.749292
		GNB	4	Age45-59	current diet	1.07707	0.734356	0.787146	0.715845	0.913762	0.845637
		GRC	1	Age45-59	current diet	1.55458	0.708059	0.823224	0.804017	0.770528	0.932082
		GRD	7	Age45-59	current diet	1.06227	0.62095	0.72074	0.657415	0.834602	0.779195
		GUY	7	Age45-59	current diet	1.11204	0.611097	0.753795	0.792668	0.695556	0.793031
		HND	7	Age45-59	current diet	0.833699	0.655603	0.490193	0.610723	0.58439	0.634921
		HRV	1	Age45-59	current diet	1.28588	0.649763	0.808555	0.725525	0.796567	0.853258
		HTI	7	Age45-59	current diet	1.32315	0.715235	0.783736	0.704551	0.983452	0.902025
		HUN	1	Age45-59	current diet	1.39726	0.680661	0.836872	0.752466	0.891354	0.911723
		IDN	6	Age45-59	current diet	1.20182	0.625314	0.840357	0.753727	0.896792	0.863601
		IND	6	Age45-59	current diet	0.813111	0.633371	0.519935	0.65363	0.623519	0.648713
		IRL	1	Age45-59	current diet	1.57079	0.663347	1.00239	1.01323	0.670177	0.983989
		IRN	6	Age45-59	current diet	1.08433	0.663789	0.344605	0.474676	0.551807	0.623841
		IRQ	5	Age45-59	current diet	0.870161	0.721973	0.422126	0.646688	0.622312	0.656652
		ISL	1	Age45-59	current diet	1.4669	0.614128	0.789314	0.76521	0.764101	0.87993
		ISR	5	Age45-59	current diet	1.18016	0.654277	0.745273	0.736823	0.642329	0.791773
		ITA	1	Age45-59	current diet	1.53877	0.670722	0.859449	0.883525	0.783924	0.947278
		JAM	7	Age45-59	current diet	1.27922	0.595056	0.73627	0.672252	0.741511	0.804863
		JOR	5	Age45-59	current diet	1.01079	0.646322	0.363807	0.512359	0.566145	0.619885
		JPN	3	Age45-59	current diet	1.24664	0.630651	0.740545	0.644697	0.874987	0.827505
		KAZ	5	Age45-59	current diet	1.51843	0.692005	0.822042	0.811768	0.826766	0.934202
		KEN	4	Age45-59	current diet	1.01137	0.658495	0.545773	0.551651	0.744403	0.702338
		KGZ	5	Age45-59	current diet	1.45981	0.730449	0.98275	0.975542	0.896036	1.00892
		KOR	3	Age45-59	current diet	1.25913	0.66195	0.76571	0.723865	0.830997	0.848331
		KWT	5	Age45-59	current diet	1.12584	0.605909	0.44138	0.552849	0.559404	0.657076
		LAO	6	Age45-59	current diet	1.20187	0.66856	0.891291	0.73921	0.858857	0.871957
		LCA	7	Age45-59	current diet	1.30576	0.657228	0.877812	0.788889	0.817009	0.88934
		LKA	6	Age45-59	current diet	1.00039	0.650243	0.91452	0.854501	0.820271	0.847985
		LTU	1	Age45-59	current diet	1.38689	0.634998	0.833788	0.843786	0.660867	0.872065
		LUX	1	Age45-59	current diet	1.44419	0.670817	0.933556	0.985704	0.747754	0.956404
		LVA	1	Age45-59	current diet	1.37848	0.626663	0.638323	0.656886	0.753538	0.810778
		MAR	5	Age45-59	current diet	1.00591	0.590139	0.522962	0.656237	0.610927	0.677236
		MDA	1	Age45-59	current diet	1.08632	0.649513	0.765848	0.756047	0.799374	0.811419
		MDG	4	Age45-59	current diet	1.45672	0.749096	0.882812	0.847977	1.12162	1.01164
		MDV	6	Age45-59	current diet	0.92663	0.533239	0.400097	0.50042	0.637529	0.599583
		MEX	7	Age45-59	current diet	1.07701	0.62967	0.434923	0.552124	0.631671	0.66508
		MKD	1	Age45-59	current diet	1.14225	0.64175	0.698535	0.609512	0.740926	0.766595
		MLI	4	Age45-59	current diet	0.994632	0.716992	0.690669	0.780271	0.670212	0.770555
		MLT	1	Age45-59	current diet	1.6745	0.667934	0.808643	0.837639	0.863173	0.970378
		MNE	1	Age45-59	current diet	1.41327	0.700419	0.883489	0.808936	0.729342	0.907091
		MNG	5	Age45-59	current diet	1.48609	0.809458	1.06723	1.15158	0.97725	1.09832
		MOZ	4	Age45-59	current diet	1.36854	0.739624	0.635299	0.624275	1.19555	0.912656
		MRT	4	Age45-59	current diet	0.974698	0.821333	0.901498	0.893849	0.781672	0.87461
		MUS	6	Age45-59	current diet	0.993792	0.614552	0.727949	0.733724	0.734705	0.760945
		MWI	4	Age45-59	current diet	1.3653	0.695999	0.463609	0.55438	0.948952	0.805648
		MYS	6	Age45-59	current diet	1.05292	0.592532	0.764562	0.765538	0.802929	0.795696
		NAM	4	Age45-59	current diet	1.43291	0.740013	0.702268	0.739067	0.941008	0.911054
		NER	4	Age45-59	current diet	0.815982	0.820293	0.676964	0.751451	0.67382	0.747702
		NGA	4	Age45-59	current diet	1.32212	0.65066	0.578712	0.55669	1.15697	0.85303
		NIC	7	Age45-59	current diet	0.874588	0.663099	0.496085	0.559842	0.596443	0.638011
		NLD	1	Age45-59	current diet	1.58196	0.66403	0.930974	0.826231	0.725346	0.945709
		NOR	1	Age45-59	current diet	1.21255	0.592657	0.715939	0.650929	0.710206	0.776456
		NPL	6	Age45-59	current diet	1.10412	0.748625	0.582657	0.86141	0.755325	0.810427
		NZL	2	Age45-59	current diet	1.67142	0.69776	0.934731	0.981407	0.78013	1.01309
		PAK	6	Age45-59	current diet	0.871577	0.748016	0.494018	0.685812	0.593838	0.678652
		PAN	7	Age45-59	current diet	1.21813	0.706663	0.792116	0.810575	0.786932	0.862884
		PER	7	Age45-59	current diet	1.3252	0.6251	0.76823	0.770232	0.998825	0.897517
		PHL	6	Age45-59	current diet	1.207	0.623077	0.864941	0.780627	0.838875	0.862904
		POL	1	Age45-59	current diet	1.47061	0.661204	0.718312	0.786634	0.781736	0.883699
		PRT	1	Age45-59	current diet	1.42851	0.618126	0.78804	0.733443	0.765652	0.866755
		PRY	7	Age45-59	current diet	1.72626	0.711681	0.821245	0.708685	1.22955	1.03948
		PSE	5	Age45-59	current diet	2.87893	1.04473	0.571228	0.623941	0.523277	1.12842
		ROU	1	Age45-59	current diet	1.37523	0.664066	0.883006	0.894997	0.842763	0.932011
		RUS	1	Age45-59	current diet	1.50593	0.636644	0.815332	0.821903	0.901285	0.936219
		RWA	4	Age45-59	current diet	1.1736	0.660307	0.708442	0.607679	1.28846	0.887698
		SAU	5	Age45-59	current diet	0.875213	0.605487	0.403019	0.546065	0.520625	0.590082
		SDN	4	Age45-59	current diet	0.840584	0.688717	0.751425	0.614123	0.654612	0.709892
		SEN	4	Age45-59	current diet	0.878941	0.6847	0.597954	0.612197	0.705001	0.695759
		SLV	7	Age45-59	current diet	0.878624	0.631126	0.439393	0.558941	0.631493	0.627916
		SRB	1	Age45-59	current diet	1.05811	0.643303	0.753955	0.64722	0.762287	0.772975
		SUR	7	Age45-59	current diet	1.23323	0.672067	0.868135	0.899235	0.775937	0.88972
		SVK	1	Age45-59	current diet	1.208	0.663696	0.779835	0.714772	0.847278	0.842717
		SVN	1	Age45-59	current diet	1.22184	0.628411	0.785982	0.730519	0.764297	0.826209
		SWE	1	Age45-59	current diet	1.30374	0.633188	0.755493	0.700892	0.742159	0.827095
		SWZ	4	Age45-59	current diet	1.04668	0.695388	0.580845	0.60782	0.741318	0.734411
		THA	6	Age45-59	current diet	1.21517	0.631837	0.857286	0.834673	0.893485	0.88649
		TJK	5	Age45-59	current diet	0.947008	0.732327	0.831923	0.803777	0.790965	0.8212
		TTO	7	Age45-59	current diet	1.25462	0.628974	0.773929	0.69716	0.767523	0.824442
		TUN	5	Age45-59	current diet	0.876674	0.596326	0.570688	0.575954	0.61743	0.647415
		TUR	5	Age45-59	current diet	1.051	0.68251	0.344322	0.474753	0.508769	0.612272
		TZA	4	Age45-59	current diet	1.17211	0.674613	0.507969	0.527022	0.845934	0.74553
		UKR	1	Age45-59	current diet	1.47255	0.639587	0.754848	0.729027	0.910954	0.901394
		URY	7	Age45-59	current diet	1.23963	0.657396	0.931742	0.959456	0.758759	0.909396
		USA	2	Age45-59	current diet	1.52739	0.65036	0.830895	0.750798	0.746683	0.901224
		UZB	5	Age45-59	current diet	1.18553	0.735462	0.923652	0.804514	0.833141	0.89646
		VCT	7	Age45-59	current diet	1.46086	0.6235	0.86698	0.771148	0.829642	0.910427
		ZAF	4	Age45-59	current diet	1.15098	0.670221	0.576609	0.690919	0.678839	0.753513
		ZWE	4	Age45-59	current diet	0.969446	0.758421	0.517158	0.62033	0.671194	0.70731
		AGO	4	Age60+	current diet	1.49594	0.63417	0.648491	0.584875	1.17109	0.906914
		ALB	1	Age60+	current diet	1.13733	0.667771	0.876283	0.816381	0.621408	0.823835
		ARE	5	Age60+	current diet	0.933733	0.734824	0.391154	0.575178	0.527546	0.632487
		ARG	7	Age60+	current diet	1.65918	0.720727	1.19067	1.36817	0.813554	1.15046
		ARM	1	Age60+	current diet	1.02515	0.686105	0.431654	0.584078	0.551925	0.655782
		ATG	7	Age60+	current diet	1.1556	0.588735	0.813938	0.688195	0.629735	0.77524
		AUS	2	Age60+	current diet	1.5472	0.679096	0.856439	0.820466	0.711957	0.923032
		AUT	1	Age60+	current diet	1.3346	0.651703	0.773702	0.747056	0.75442	0.852295
		AZE	1	Age60+	current diet	1.10182	0.692552	0.41863	0.596692	0.594179	0.680775
		BEL	1	Age60+	current diet	1.81441	0.661182	0.877025	0.845286	0.858763	1.01133
		BEN	4	Age60+	current diet	1.48446	0.821042	0.642972	0.761081	1.22841	0.987594
		BFA	4	Age60+	current diet	1.00568	0.889997	0.575823	0.791862	0.675357	0.787745
		BGD	6	Age60+	current diet	1.05201	0.714111	1.10526	0.888933	0.866173	0.925297
		BGR	1	Age60+	current diet	1.07761	0.659701	0.851753	0.838575	0.738481	0.833224
		BHS	7	Age60+	current diet	1.40867	0.644986	0.8717	0.789496	0.813833	0.905737
		BIH	1	Age60+	current diet	0.995338	0.626756	0.777676	0.739042	0.68312	0.764386
		BLR	1	Age60+	current diet	1.71044	0.631168	0.65102	0.724578	0.785677	0.900576
		BLZ	7	Age60+	current diet	0.93185	0.588257	0.586891	0.586533	0.665987	0.671904
		BOL	7	Age60+	current diet	1.44288	0.658717	0.803236	0.82071	0.894367	0.923982
		BRA	7	Age60+	current diet	1.57771	0.636506	0.928659	0.944558	0.823605	0.982208
		BRB	7	Age60+	current diet	1.30275	0.571197	0.740759	0.64934	0.766641	0.806137
		BRN	6	Age60+	current diet	1.13932	0.592931	0.756529	0.739449	0.812469	0.80814
		BWA	4	Age60+	current diet	1.13418	0.700074	0.699676	0.704499	0.748592	0.797403
		CAF	4	Age60+	current diet	1.60378	0.755806	0.783277	0.636242	1.44215	1.04425
		CAN	2	Age60+	current diet	1.35221	0.621991	0.715256	0.612854	0.766413	0.813745
		CHE	1	Age60+	current diet	1.21191	0.646844	0.785893	0.708488	0.687985	0.808223
		CHL	7	Age60+	current diet	1.47028	0.631446	0.910332	0.894836	0.817724	0.944923
		CHN	3	Age60+	current diet	1.51546	0.681342	0.755729	0.681262	0.943756	0.91551
		CIV	4	Age60+	current diet	1.48248	0.6779	0.774988	0.729971	1.46565	1.0262
		CMR	4	Age60+	current diet	1.3417	0.622956	0.53888	0.566927	0.877393	0.789572
		COG	4	Age60+	current diet	1.71857	0.699238	0.855801	0.695839	1.38737	1.07136
		COL	7	Age60+	current diet	1.42118	0.666336	0.873529	0.843263	0.911689	0.9432
		CPV	4	Age60+	current diet	1.02102	0.609949	0.624907	0.729477	0.637156	0.724501
		CRI	7	Age60+	current diet	1.01381	0.617093	0.774588	0.730744	0.655015	0.758249
		CYP	1	Age60+	current diet	1.22333	0.637475	0.692102	0.604938	0.744242	0.780417
		CZE	1	Age60+	current diet	1.22304	0.647833	0.791214	0.735455	0.783419	0.836193
		DEU	1	Age60+	current diet	1.30946	0.645433	0.783666	0.733213	0.738648	0.842083
		DJI	4	Age60+	current diet	0.919816	0.751755	0.913534	0.807943	0.784964	0.835602
		DMA	7	Age60+	current diet	1.77105	0.63632	0.887466	0.860171	0.889472	1.0089
		DNK	1	Age60+	current diet	1.17348	0.600457	0.791343	0.764122	0.552047	0.776289
		DOM	7	Age60+	current diet	1.27587	0.664388	0.851872	0.806926	0.845286	0.888868
		DZA	5	Age60+	current diet	0.980483	0.612643	0.629069	0.675506	0.678512	0.715242
		ECU	7	Age60+	current diet	1.14479	0.673021	0.920043	0.864565	0.714196	0.863323
		EGY	5	Age60+	current diet	1.04512	0.625743	0.806047	0.650714	0.663059	0.758137
		ESP	1	Age60+	current diet	1.58392	0.638264	0.734691	0.646646	0.857993	0.892304
		EST	1	Age60+	current diet	1.23422	0.624053	0.783303	0.800241	0.684181	0.825201
		ETH	4	Age60+	current diet	1.02107	0.767291	0.554054	0.67396	0.745398	0.752355
		FIN	1	Age60+	current diet	1.17214	0.594507	0.704441	0.681566	0.617476	0.754026
		FJI	2	Age60+	current diet	1.46611	0.636319	0.798018	0.815188	0.976248	0.938377
		FRA	1	Age60+	current diet	1.45656	0.632098	0.888601	0.835202	0.727603	0.908014
		GBR	1	Age60+	current diet	1.45842	0.607889	0.758099	0.707735	0.822922	0.871013
		GEO	1	Age60+	current diet	1.02841	0.681867	0.398426	0.591027	0.572414	0.654428
		GHA	4	Age60+	current diet	1.40638	0.651313	0.693384	0.593797	1.579	0.984775
		GIN	4	Age60+	current diet	1.24894	0.634996	0.795469	0.756692	0.987206	0.884661
		GMB	4	Age60+	current diet	0.925038	0.707064	0.73469	0.749602	0.67242	0.757763
		GNB	4	Age60+	current diet	1.16459	0.716727	0.868323	0.808412	0.922699	0.896149
		GRC	1	Age60+	current diet	1.44176	0.690636	0.80355	0.747385	0.742154	0.885097
		GRD	7	Age60+	current diet	1.11477	0.601496	0.754256	0.668999	0.829136	0.793732
		GUY	7	Age60+	current diet	1.15729	0.590011	0.816228	0.781574	0.677156	0.804451
		HND	7	Age60+	current diet	0.844244	0.640842	0.495322	0.611239	0.555328	0.629395
		HRV	1	Age60+	current diet	1.20293	0.636734	0.835642	0.759036	0.749481	0.836764
		HTI	7	Age60+	current diet	1.4452	0.705543	0.825362	0.773806	1.02373	0.954728
		HUN	1	Age60+	current diet	1.30722	0.672533	0.849916	0.769431	0.849293	0.889679
		IDN	6	Age60+	current diet	1.20039	0.618593	0.838047	0.742478	0.905247	0.860951
		IND	6	Age60+	current diet	0.82087	0.621426	0.53265	0.687412	0.605301	0.653532
		IRL	1	Age60+	current diet	1.46927	0.652496	1.00113	0.984753	0.637412	0.949011
		IRN	6	Age60+	current diet	1.14807	0.669281	0.353869	0.478552	0.537858	0.637526
		IRQ	5	Age60+	current diet	0.89796	0.73065	0.42541	0.649833	0.607203	0.662212
		ISL	1	Age60+	current diet	1.35731	0.598763	0.765325	0.720569	0.732708	0.834935
		ISR	5	Age60+	current diet	1.21453	0.6258	0.778564	0.715098	0.60977	0.788753
		ITA	1	Age60+	current diet	1.41371	0.65254	0.829894	0.793359	0.751404	0.88818
		JAM	7	Age60+	current diet	1.39807	0.579592	0.805905	0.770448	0.742605	0.859324
		JOR	5	Age60+	current diet	1.05395	0.650361	0.372655	0.514563	0.548832	0.628073
		JPN	3	Age60+	current diet	1.144	0.600064	0.69982	0.604784	0.847977	0.779328
		KAZ	5	Age60+	current diet	1.40788	0.67339	0.833956	0.862718	0.759167	0.907422
		KEN	4	Age60+	current diet	0.99014	0.626638	0.548535	0.590707	0.678821	0.686968
		KGZ	5	Age60+	current diet	1.37841	0.718596	1.03609	0.994468	0.845719	0.994656
		KOR	3	Age60+	current diet	1.15138	0.636501	0.726936	0.659831	0.804673	0.795864
		KWT	5	Age60+	current diet	1.20732	0.613168	0.458213	0.576147	0.54255	0.67948
		LAO	6	Age60+	current diet	1.18815	0.654507	0.882762	0.715184	0.858877	0.859897
		LCA	7	Age60+	current diet	1.38773	0.631385	0.942551	0.84716	0.803483	0.922461
		LKA	6	Age60+	current diet	1.02295	0.637569	0.968171	0.827608	0.813693	0.853997
		LTU	1	Age60+	current diet	1.31076	0.624057	0.827027	0.888507	0.607127	0.851496
		LUX	1	Age60+	current diet	1.33637	0.653577	0.898469	0.905842	0.710085	0.900869
		LVA	1	Age60+	current diet	1.29715	0.614048	0.614304	0.662639	0.686906	0.77501
		MAR	5	Age60+	current diet	1.04458	0.59425	0.524889	0.65831	0.592346	0.682876
		MDA	1	Age60+	current diet	1.0343	0.639956	0.780955	0.818716	0.760304	0.806846
		MDG	4	Age60+	current diet	1.49258	0.729834	0.98079	0.940006	1.14165	1.05697
		MDV	6	Age60+	current diet	0.938443	0.52655	0.406237	0.543564	0.631557	0.60927
		MEX	7	Age60+	current diet	1.12751	0.623839	0.45744	0.573053	0.608345	0.678038
		MKD	1	Age60+	current diet	1.07637	0.628647	0.718164	0.65049	0.71158	0.75705
		MLI	4	Age60+	current diet	1.04304	0.696927	0.781505	0.776509	0.617229	0.783042
		MLT	1	Age60+	current diet	1.54479	0.644207	0.767273	0.729914	0.846757	0.906589
		MNE	1	Age60+	current diet	1.32134	0.681534	0.923473	0.888139	0.68455	0.899807
		MNG	5	Age60+	current diet	1.40415	0.795361	1.08892	1.09407	0.92109	1.06072
		MOZ	4	Age60+	current diet	1.38083	0.717488	0.647347	0.658001	1.24825	0.930383
		MRT	4	Age60+	current diet	0.981245	0.780537	1.00387	0.940965	0.716148	0.884554
		MUS	6	Age60+	current diet	1.01771	0.594111	0.804942	0.720789	0.715411	0.770593
		MWI	4	Age60+	current diet	1.3772	0.659028	0.455281	0.580993	0.938397	0.802179
		MYS	6	Age60+	current diet	0.984771	0.575545	0.727651	0.718159	0.787456	0.758717
		NAM	4	Age60+	current diet	1.58958	0.715434	0.725462	0.757038	0.932476	0.943997
		NER	4	Age60+	current diet	0.81984	0.700361	0.699557	0.730436	0.625947	0.715228
		NGA	4	Age60+	current diet	1.35882	0.630639	0.617937	0.657793	1.22461	0.89796
		NIC	7	Age60+	current diet	0.892381	0.644907	0.512808	0.592899	0.564823	0.641563
		NLD	1	Age60+	current diet	1.49098	0.652296	0.932178	0.828324	0.690036	0.918764
		NOR	1	Age60+	current diet	1.1449	0.579738	0.689247	0.61894	0.678865	0.742339
		NPL	6	Age60+	current diet	1.11948	0.740865	0.603626	0.843994	0.735233	0.80864
		NZL	2	Age60+	current diet	1.52097	0.674988	0.897225	0.893587	0.73809	0.944971
		PAK	6	Age60+	current diet	0.868156	0.743483	0.502695	0.6919	0.57221	0.675689
		PAN	7	Age60+	current diet	1.34504	0.702675	0.863157	1.04719	0.79351	0.950315
		PER	7	Age60+	current diet	1.42166	0.611731	0.812086	0.858571	0.996755	0.940161
		PHL	6	Age60+	current diet	1.16161	0.607579	0.850296	0.747156	0.833223	0.839973
		POL	1	Age60+	current diet	1.36958	0.646758	0.697483	0.796388	0.706834	0.843408
		PRT	1	Age60+	current diet	1.31335	0.600638	0.750384	0.67072	0.737869	0.814592
		PRY	7	Age60+	current diet	2.02304	0.710315	0.915034	0.80213	1.33519	1.15714
		PSE	5	Age60+	current diet	3.0819	1.0722	0.56479	0.664944	0.536326	1.18403
		ROU	1	Age60+	current diet	1.27936	0.651017	0.917096	0.901332	0.786412	0.907044
		RUS	1	Age60+	current diet	1.38913	0.620297	0.815755	0.890753	0.840302	0.911248
		RWA	4	Age60+	current diet	1.10761	0.580367	0.651778	0.595898	1.25152	0.837435
		SAU	5	Age60+	current diet	0.90724	0.608849	0.411168	0.551349	0.501539	0.596029
		SDN	4	Age60+	current diet	0.834428	0.673172	0.852491	0.754989	0.594284	0.741873
		SEN	4	Age60+	current diet	0.919085	0.657424	0.646454	0.656737	0.682076	0.712355
		SLV	7	Age60+	current diet	0.899867	0.61575	0.434802	0.550722	0.6093	0.622088
		SRB	1	Age60+	current diet	1.01908	0.63572	0.779486	0.690595	0.728833	0.770742
		SUR	7	Age60+	current diet	1.28726	0.653613	0.933167	0.928781	0.768463	0.914256
		SVK	1	Age60+	current diet	1.12081	0.650525	0.785071	0.739767	0.804139	0.820063
		SVN	1	Age60+	current diet	1.14182	0.616847	0.803203	0.775336	0.7127	0.809981
		SWE	1	Age60+	current diet	1.21412	0.616238	0.730928	0.663614	0.705516	0.786084
		SWZ	4	Age60+	current diet	1.07779	0.678121	0.602603	0.670293	0.72533	0.750828
		THA	6	Age60+	current diet	1.16538	0.615906	0.840823	0.793499	0.884531	0.860027
		TJK	5	Age60+	current diet	0.905977	0.71776	0.846798	0.794253	0.769125	0.806783
		TTO	7	Age60+	current diet	1.30481	0.609088	0.843272	0.806954	0.756411	0.864108
		TUN	5	Age60+	current diet	0.907347	0.591744	0.572211	0.568786	0.588737	0.645765
		TUR	5	Age60+	current diet	1.11476	0.689922	0.356028	0.480655	0.489944	0.626261
		TZA	4	Age60+	current diet	1.1994	0.631986	0.498341	0.536366	0.818607	0.736941
		UKR	1	Age60+	current diet	1.37254	0.62371	0.753939	0.773859	0.853397	0.875489
		URY	7	Age60+	current diet	1.32521	0.662212	1.11651	1.09198	0.707158	0.980614
		USA	2	Age60+	current diet	1.39465	0.632234	0.792736	0.694803	0.721753	0.847236
		UZB	5	Age60+	current diet	1.11277	0.716875	0.957548	0.804172	0.790864	0.876446
		VCT	7	Age60+	current diet	1.65683	0.607785	0.958887	0.891552	0.842369	0.991486
		ZAF	4	Age60+	current diet	1.1539	0.651667	0.610498	0.822427	0.633025	0.774304
		ZWE	4	Age60+	current diet	0.989986	0.741189	0.536713	0.678256	0.651791	0.719587
		AGO	4	MEAN	current diet	1.46385	0.652221	0.6781	0.600596	1.20051	0.919056
		ALB	1	MEAN	current diet	1.22978	0.680894	0.879353	0.831532	0.642715	0.852856
		ARE	5	MEAN	current diet	0.963506	0.753088	0.453439	0.616748	0.560489	0.669454
		ARG	7	MEAN	current diet	1.66701	0.734218	1.13076	1.23678	0.83901	1.12156
		ARM	1	MEAN	current diet	1.04815	0.676888	0.464302	0.602492	0.57853	0.674073
		ATG	7	MEAN	current diet	1.16089	0.604509	0.795207	0.685901	0.647121	0.778727
		AUS	2	MEAN	current diet	1.62413	0.702536	0.906102	0.89018	0.711163	0.966822
		AUT	1	MEAN	current diet	1.38835	0.672383	0.826057	0.818541	0.766909	0.894448
		AZE	1	MEAN	current diet	1.07839	0.66829	0.420397	0.594081	0.617524	0.675736
		BEL	1	MEAN	current diet	1.84712	0.687196	0.921795	0.928842	0.847134	1.04642
		BEN	4	MEAN	current diet	1.4671	0.844616	0.674634	0.749844	1.26019	0.999276
		BFA	4	MEAN	current diet	0.984119	0.90966	0.603648	0.818224	0.699463	0.803023
		BGD	6	MEAN	current diet	1.0081	0.735602	0.99552	0.924673	0.892624	0.911303
		BGR	1	MEAN	current diet	1.19244	0.682896	0.867871	0.89237	0.77171	0.881458
		BHS	7	MEAN	current diet	1.40315	0.655534	0.849441	0.786377	0.828066	0.904513
		BIH	1	MEAN	current diet	1.06138	0.638558	0.788478	0.773775	0.713712	0.79518
		BLR	1	MEAN	current diet	1.8657	0.653377	0.722705	0.778749	0.861069	0.97632
		BLZ	7	MEAN	current diet	0.940816	0.608985	0.594004	0.588055	0.687054	0.683783
		BOL	7	MEAN	current diet	1.46393	0.685028	0.792894	0.793955	0.915474	0.930257
		BRA	7	MEAN	current diet	1.55228	0.649659	0.894435	0.854083	0.830049	0.956101
		BRB	7	MEAN	current diet	1.32927	0.594183	0.722381	0.644626	0.788839	0.81586
		BRN	6	MEAN	current diet	1.37235	0.610396	0.868828	0.840011	0.82085	0.902488
		BWA	4	MEAN	current diet	1.1457	0.722226	0.708502	0.688891	0.796332	0.812329
		CAF	4	MEAN	current diet	1.58166	0.776544	0.815251	0.658613	1.47391	1.06119
		CAN	2	MEAN	current diet	1.42004	0.641476	0.755994	0.663913	0.766098	0.849503
		CHE	1	MEAN	current diet	1.29653	0.671496	0.835628	0.786953	0.696046	0.85733
		CHL	7	MEAN	current diet	1.50668	0.650614	0.879224	0.91029	0.850242	0.95941
		CHN	3	MEAN	current diet	1.68925	0.690194	0.812455	0.74279	0.971915	0.98132
		CIV	4	MEAN	current diet	1.45857	0.696236	0.786542	0.676382	1.47996	1.01954
		CMR	4	MEAN	current diet	1.34126	0.652214	0.578964	0.561789	0.917077	0.810261
		COG	4	MEAN	current diet	1.72668	0.719382	0.853113	0.705355	1.38499	1.0779
		COL	7	MEAN	current diet	1.43036	0.689084	0.867896	0.843036	0.923197	0.950714
		CPV	4	MEAN	current diet	1.05832	0.633378	0.629586	0.663185	0.702031	0.7373
		CRI	7	MEAN	current diet	1.02701	0.634008	0.762151	0.713634	0.678248	0.763011
		CYP	1	MEAN	current diet	1.29313	0.660434	0.734844	0.657546	0.752676	0.819726
		CZE	1	MEAN	current diet	1.38067	0.681778	0.838621	0.7928	0.836798	0.906134
		DEU	1	MEAN	current diet	1.38116	0.674045	0.83941	0.808125	0.749335	0.890414
		DJI	4	MEAN	current diet	0.930644	0.77389	0.921675	0.855974	0.810436	0.858524
		DMA	7	MEAN	current diet	1.71302	0.648742	0.855358	0.846574	0.868798	0.986499
		DNK	1	MEAN	current diet	1.19855	0.628308	0.868057	0.856003	0.560194	0.822222
		DOM	7	MEAN	current diet	1.26043	0.680714	0.844119	0.800317	0.857991	0.888714
		DZA	5	MEAN	current diet	1.01537	0.615141	0.714381	0.720931	0.743785	0.761922
		ECU	7	MEAN	current diet	1.14093	0.679937	0.889185	0.813254	0.73218	0.851096
		EGY	5	MEAN	current diet	1.12661	0.626222	0.866175	0.706661	0.697321	0.804599
		ESP	1	MEAN	current diet	1.62855	0.653287	0.767036	0.687391	0.858344	0.918922
		EST	1	MEAN	current diet	1.35502	0.649675	0.827916	0.832222	0.740515	0.88107
		ETH	4	MEAN	current diet	1.02804	0.793769	0.584501	0.681674	0.779448	0.773486
		FIN	1	MEAN	current diet	1.19332	0.62142	0.77007	0.738053	0.628434	0.790259
		FJI	2	MEAN	current diet	1.64909	0.677711	0.862092	0.89633	0.975317	1.01211
		FRA	1	MEAN	current diet	1.5316	0.656649	0.94409	0.924768	0.729088	0.957239
		GBR	1	MEAN	current diet	1.50051	0.62934	0.801719	0.752947	0.815885	0.900079
		GEO	1	MEAN	current diet	1.03322	0.677264	0.408752	0.596146	0.59366	0.661809
		GHA	4	MEAN	current diet	1.38922	0.664785	0.706969	0.588112	1.59857	0.989531
		GIN	4	MEAN	current diet	1.25935	0.655643	0.804113	0.800774	1.01703	0.907381
		GMB	4	MEAN	current diet	0.905132	0.733001	0.746688	0.785664	0.703659	0.774829
		GNB	4	MEAN	current diet	1.15391	0.738198	0.869402	0.845488	0.947365	0.910872
		GRC	1	MEAN	current diet	1.46842	0.691625	0.833469	0.79201	0.740217	0.905149
		GRD	7	MEAN	current diet	1.1285	0.625013	0.755765	0.685451	0.844042	0.807755
		GUY	7	MEAN	current diet	1.17769	0.614094	0.810987	0.819937	0.693783	0.823298
		HND	7	MEAN	current diet	0.863043	0.661398	0.51385	0.63811	0.573878	0.650056
		HRV	1	MEAN	current diet	1.31877	0.664038	0.84647	0.780417	0.783166	0.878573
		HTI	7	MEAN	current diet	1.43142	0.724839	0.829181	0.774225	1.01971	0.955875
		HUN	1	MEAN	current diet	1.45787	0.695291	0.874797	0.802019	0.885871	0.943169
		IDN	6	MEAN	current diet	1.27907	0.629636	0.871702	0.780049	0.911306	0.894352
		IND	6	MEAN	current diet	0.81561	0.637959	0.52889	0.62619	0.62441	0.646611
		IRL	1	MEAN	current diet	1.49649	0.674213	1.06465	1.06978	0.623801	0.985785
		IRN	6	MEAN	current diet	1.08769	0.626622	0.360256	0.478064	0.562704	0.623067
		IRQ	5	MEAN	current diet	0.851844	0.701146	0.448153	0.658539	0.647301	0.661396
		ISL	1	MEAN	current diet	1.42451	0.633702	0.820022	0.790091	0.730754	0.879815
		ISR	5	MEAN	current diet	1.30855	0.633741	0.81997	0.776137	0.637496	0.835178
		ITA	1	MEAN	current diet	1.45974	0.66194	0.86275	0.887597	0.756359	0.925678
		JAM	7	MEAN	current diet	1.39891	0.597636	0.792833	0.760073	0.751351	0.86016
		JOR	5	MEAN	current diet	1.02763	0.627351	0.395581	0.531822	0.58456	0.633389
		JPN	3	MEAN	current diet	1.30231	0.631165	0.758801	0.66444	0.86324	0.843991
		KAZ	5	MEAN	current diet	1.50374	0.692926	0.877723	0.893241	0.816175	0.956761
		KEN	4	MEAN	current diet	1.0474	0.660672	0.583926	0.597112	0.759952	0.729812
		KGZ	5	MEAN	current diet	1.48228	0.736957	1.03648	1.06898	0.879225	1.04078
		KOR	3	MEAN	current diet	1.36389	0.671481	0.802164	0.771309	0.84039	0.889848
		KWT	5	MEAN	current diet	1.15622	0.586532	0.490675	0.57144	0.574664	0.675906
		LAO	6	MEAN	current diet	1.27197	0.673855	0.930108	0.773153	0.878595	0.905535
		LCA	7	MEAN	current diet	1.40328	0.659376	0.934451	0.855984	0.820591	0.934737
		LKA	6	MEAN	current diet	1.01789	0.658418	0.899087	0.874646	0.822653	0.854538
		LTU	1	MEAN	current diet	1.44031	0.653913	0.891136	0.931566	0.658839	0.915153
		LUX	1	MEAN	current diet	1.38967	0.676909	0.954534	0.990574	0.716615	0.945661
		LVA	1	MEAN	current diet	1.42107	0.642934	0.680719	0.717332	0.746381	0.841688
		MAR	5	MEAN	current diet	1.07419	0.591658	0.607223	0.690858	0.643159	0.721418
		MDA	1	MEAN	current diet	1.13777	0.665022	0.80789	0.820084	0.799857	0.846125
		MDG	4	MEAN	current diet	1.50194	0.754992	0.989603	0.993913	1.19282	1.08665
		MDV	6	MEAN	current diet	0.947857	0.52485	0.404349	0.491342	0.637958	0.601271
		MEX	7	MEAN	current diet	1.13424	0.638472	0.459996	0.580443	0.626802	0.68799
		MKD	1	MEAN	current diet	1.17025	0.641235	0.726873	0.653839	0.733687	0.785178
		MLI	4	MEAN	current diet	1.03056	0.716489	0.784562	0.786192	0.680305	0.799621
		MLT	1	MEAN	current diet	1.60653	0.666338	0.807359	0.815175	0.846551	0.948391
		MNE	1	MEAN	current diet	1.42718	0.70208	0.931498	0.893994	0.715933	0.934137
		MNG	5	MEAN	current diet	1.5678	0.843616	1.12995	1.25025	0.979287	1.15418
		MOZ	4	MEAN	current diet	1.38169	0.749701	0.699495	0.670864	1.29259	0.958869
		MRT	4	MEAN	current diet	0.988423	0.816229	0.988087	0.970448	0.778856	0.908409
		MUS	6	MEAN	current diet	1.03332	0.609053	0.782832	0.757054	0.733188	0.78309
		MWI	4	MEAN	current diet	1.37163	0.698035	0.501184	0.578492	0.998012	0.829471
		MYS	6	MEAN	current diet	1.17375	0.609829	0.828875	0.831478	0.815553	0.851896
		NAM	4	MEAN	current diet	1.59569	0.740267	0.746562	0.766643	0.993957	0.968624
		NER	4	MEAN	current diet	0.850604	0.804192	0.764507	0.740125	0.684139	0.768713
		NGA	4	MEAN	current diet	1.3455	0.651185	0.65058	0.663216	1.24974	0.912044
		NIC	7	MEAN	current diet	0.906939	0.667574	0.526617	0.602917	0.583186	0.657447
		NLD	1	MEAN	current diet	1.49515	0.665683	0.969414	0.875722	0.688378	0.938869
		NOR	1	MEAN	current diet	1.17673	0.605942	0.74778	0.678831	0.687385	0.779334
		NPL	6	MEAN	current diet	1.09115	0.746652	0.57912	0.82275	0.758108	0.799556
		NZL	2	MEAN	current diet	1.59622	0.707651	0.956244	0.984844	0.735923	0.996176
		PAK	6	MEAN	current diet	0.877795	0.755939	0.515146	0.711108	0.583206	0.688639
		PAN	7	MEAN	current diet	1.29982	0.718574	0.845571	0.924257	0.797981	0.91724
		PER	7	MEAN	current diet	1.42756	0.630169	0.812793	0.893708	1.02129	0.957104
		PHL	6	MEAN	current diet	1.31835	0.646193	0.914115	0.841017	0.860266	0.915987
		POL	1	MEAN	current diet	1.52406	0.67662	0.773131	0.869761	0.780312	0.924777
		PRT	1	MEAN	current diet	1.37496	0.618719	0.796624	0.734856	0.743985	0.853828
		PRY	7	MEAN	current diet	1.97143	0.722701	0.895654	0.777342	1.29125	1.13167
		PSE	5	MEAN	current diet	2.5202	0.913833	0.646799	0.663823	0.518018	1.05253
		ROU	1	MEAN	current diet	1.40774	0.667945	0.929423	0.954952	0.831148	0.958242
		RUS	1	MEAN	current diet	1.58233	0.655546	0.864512	0.90295	0.898454	0.980759
		RWA	4	MEAN	current diet	1.1827	0.666299	0.743011	0.61481	1.37641	0.916646
		SAU	5	MEAN	current diet	0.893685	0.593521	0.446493	0.561248	0.527674	0.604524
		SDN	4	MEAN	current diet	0.852847	0.683031	0.809013	0.739014	0.655544	0.74789
		SEN	4	MEAN	current diet	0.91198	0.679456	0.667751	0.696498	0.714021	0.733941
		SLV	7	MEAN	current diet	0.917188	0.634307	0.450655	0.573016	0.628449	0.640723
		SRB	1	MEAN	current diet	1.08778	0.651089	0.780889	0.684458	0.751192	0.791082
		SUR	7	MEAN	current diet	1.30301	0.681059	0.921488	0.976724	0.783739	0.933204
		SVK	1	MEAN	current diet	1.28022	0.683506	0.819997	0.777691	0.848394	0.881961
		SVN	1	MEAN	current diet	1.26996	0.640882	0.828034	0.785865	0.758737	0.856695
		SWE	1	MEAN	current diet	1.25986	0.641073	0.784674	0.723219	0.71288	0.82434
		SWZ	4	MEAN	current diet	1.09492	0.693953	0.624083	0.672824	0.760233	0.769202
		THA	6	MEAN	current diet	1.31157	0.648998	0.890377	0.882036	0.899097	0.926415
		TJK	5	MEAN	current diet	0.963949	0.730567	0.859828	0.861738	0.803732	0.843963
		TTO	7	MEAN	current diet	1.33471	0.633584	0.824365	0.780544	0.773739	0.869388
		TUN	5	MEAN	current diet	0.928248	0.594591	0.640447	0.608963	0.633149	0.68108
		TUR	5	MEAN	current diet	1.04108	0.644291	0.357696	0.483859	0.508336	0.607053
		TZA	4	MEAN	current diet	1.27948	0.670442	0.547216	0.549508	0.891007	0.787531
		UKR	1	MEAN	current diet	1.51122	0.649235	0.794542	0.795973	0.904435	0.931081
		URY	7	MEAN	current diet	1.33288	0.669994	1.04906	1.05645	0.739591	0.969595
		USA	2	MEAN	current diet	1.47398	0.658897	0.843388	0.772852	0.72342	0.894507
		UZB	5	MEAN	current diet	1.15155	0.718485	0.95743	0.848826	0.826211	0.900501
		VCT	7	MEAN	current diet	1.59575	0.626581	0.926692	0.854461	0.847005	0.970098
		ZAF	4	MEAN	current diet	1.18479	0.668079	0.610746	0.809533	0.67651	0.789932
		ZWE	4	MEAN	current diet	0.98005	0.756219	0.558503	0.671635	0.679528	0.729187
		AGO	4	Age0-5	α=1.0; HOS	0.705432	0.612082	0.452726	0.504759	0.556899	0.566379
		ALB	1	Age0-5	α=1.0; HOS	0.786722	0.618892	0.583082	0.564036	0.70522	0.65159
		ARE	5	Age0-5	α=1.0; HOS	0.77775	0.604777	0.493225	0.49958	0.660004	0.607067
		ARG	7	Age0-5	α=1.0; HOS	0.708442	0.617051	0.487764	0.580096	0.547371	0.588145
		ARM	1	Age0-5	α=1.0; HOS	0.642189	0.579124	0.420471	0.498078	0.492381	0.526449
		ATG	7	Age0-5	α=1.0; HOS	0.976476	0.595441	0.602842	0.551909	0.716688	0.688671
		AUS	2	Age0-5	α=1.0; HOS	0.807579	0.610366	0.529971	0.513433	0.668566	0.625983
		AUT	1	Age0-5	α=1.0; HOS	0.61186	0.604175	0.484618	0.46059	0.579858	0.54822
		AZE	1	Age0-5	α=1.0; HOS	0.627923	0.588475	0.429754	0.501991	0.496999	0.529029
		BEL	1	Age0-5	α=1.0; HOS	0.601435	0.589067	0.485669	0.463488	0.574073	0.542747
		BEN	4	Age0-5	α=1.0; HOS	0.6909	0.605297	0.43377	0.496243	0.54547	0.554336
		BFA	4	Age0-5	α=1.0; HOS	0.680405	0.624126	0.443316	0.516994	0.554291	0.563826
		BGD	6	Age0-5	α=1.0; HOS	0.760905	0.604113	0.455883	0.478608	0.619441	0.58379
		BGR	1	Age0-5	α=1.0; HOS	0.642112	0.575246	0.441702	0.49556	0.494105	0.529745
		BHS	7	Age0-5	α=1.0; HOS	0.654283	0.575389	0.483862	0.494052	0.536828	0.548883
		BIH	1	Age0-5	α=1.0; HOS	0.664404	0.591696	0.424123	0.480858	0.505759	0.533368
		BLR	1	Age0-5	α=1.0; HOS	0.695117	0.575405	0.444274	0.495465	0.538452	0.549743
		BLZ	7	Age0-5	α=1.0; HOS	0.665136	0.584103	0.444441	0.512288	0.496064	0.540407
		BOL	7	Age0-5	α=1.0; HOS	0.721802	0.599523	0.506141	0.534037	0.59164	0.590629
		BRA	7	Age0-5	α=1.0; HOS	0.676511	0.591847	0.449197	0.501229	0.521264	0.54801
		BRB	7	Age0-5	α=1.0; HOS	0.651248	0.586793	0.462912	0.474446	0.554468	0.545973
		BRN	6	Age0-5	α=1.0; HOS	0.998672	0.57507	0.458445	0.540627	0.755057	0.665574
		BWA	4	Age0-5	α=1.0; HOS	0.655719	0.627047	0.467344	0.504753	0.573754	0.565723
		CAF	4	Age0-5	α=1.0; HOS	0.718822	0.632176	0.498382	0.596308	0.543405	0.597819
		CAN	2	Age0-5	α=1.0; HOS	0.690409	0.582873	0.481751	0.492464	0.624005	0.574301
		CHE	1	Age0-5	α=1.0; HOS	0.684722	0.590035	0.487493	0.501151	0.592792	0.571239
		CHL	7	Age0-5	α=1.0; HOS	0.818545	0.602125	0.541607	0.585593	0.708862	0.651346
		CHN	3	Age0-5	α=1.0; HOS	0.767281	0.585825	0.501985	0.486843	0.647868	0.59796
		CIV	4	Age0-5	α=1.0; HOS	0.70897	0.666916	0.571576	0.519904	0.65516	0.624505
		CMR	4	Age0-5	α=1.0; HOS	0.646677	0.606966	0.455045	0.482412	0.556023	0.549425
		COG	4	Age0-5	α=1.0; HOS	0.704305	0.595654	0.449537	0.49922	0.53044	0.555831
		COL	7	Age0-5	α=1.0; HOS	0.633103	0.604282	0.49458	0.502367	0.563174	0.559501
		CPV	4	Age0-5	α=1.0; HOS	0.664953	0.599163	0.453426	0.512745	0.530704	0.552198
		CRI	7	Age0-5	α=1.0; HOS	0.839313	0.659992	0.578975	0.606662	0.707385	0.678465
		CYP	1	Age0-5	α=1.0; HOS	0.611916	0.610048	0.502538	0.478924	0.580606	0.556806
		CZE	1	Age0-5	α=1.0; HOS	0.7559	0.608518	0.620146	0.513063	0.736588	0.646843
		DEU	1	Age0-5	α=1.0; HOS	0.613732	0.590037	0.520115	0.463572	0.583973	0.554286
		DJI	4	Age0-5	α=1.0; HOS	0.706998	0.698439	0.495706	0.550251	0.595161	0.609311
		DMA	7	Age0-5	α=1.0; HOS	0.700679	0.589649	0.479855	0.544111	0.519412	0.566741
		DNK	1	Age0-5	α=1.0; HOS	0.750751	0.581708	0.4834	0.498191	0.585206	0.579851
		DOM	7	Age0-5	α=1.0; HOS	0.624918	0.6133	0.567329	0.550172	0.598828	0.590909
		DZA	5	Age0-5	α=1.0; HOS	0.627555	0.581834	0.486717	0.468737	0.623378	0.557644
		ECU	7	Age0-5	α=1.0; HOS	0.662507	0.621715	0.550803	0.520297	0.607611	0.592587
		EGY	5	Age0-5	α=1.0; HOS	0.641862	0.581378	0.474895	0.461605	0.550583	0.542065
		ESP	1	Age0-5	α=1.0; HOS	0.619879	0.581135	0.490473	0.472343	0.55556	0.543878
		EST	1	Age0-5	α=1.0; HOS	0.655099	0.575715	0.427031	0.484417	0.498025	0.528058
		ETH	4	Age0-5	α=1.0; HOS	0.65003	0.656177	0.457908	0.508905	0.576236	0.569851
		FIN	1	Age0-5	α=1.0; HOS	0.645094	0.587518	0.499071	0.480957	0.568435	0.556215
		FJI	2	Age0-5	α=1.0; HOS	0.648246	0.58278	0.477152	0.471319	0.567163	0.549332
		FRA	1	Age0-5	α=1.0; HOS	0.619856	0.588587	0.51548	0.476789	0.579559	0.556054
		GBR	1	Age0-5	α=1.0; HOS	0.623665	0.591363	0.477436	0.462513	0.555187	0.542033
		GEO	1	Age0-5	α=1.0; HOS	0.675062	0.591742	0.429581	0.502854	0.530651	0.545978
		GHA	4	Age0-5	α=1.0; HOS	0.701478	0.577083	0.425476	0.479159	0.522964	0.541232
		GIN	4	Age0-5	α=1.0; HOS	0.665391	0.592159	0.431008	0.501005	0.509822	0.539877
		GMB	4	Age0-5	α=1.0; HOS	0.670808	0.60264	0.440285	0.518929	0.513053	0.549143
		GNB	4	Age0-5	α=1.0; HOS	0.665647	0.642312	0.50337	0.527537	0.600637	0.587901
		GRC	1	Age0-5	α=1.0; HOS	0.65236	0.573097	0.437603	0.463381	0.520548	0.529398
		GRD	7	Age0-5	α=1.0; HOS	0.754916	0.591555	0.509005	0.503441	0.618303	0.595444
		GUY	7	Age0-5	α=1.0; HOS	0.660384	0.597815	0.429793	0.497102	0.503342	0.537687
		HND	7	Age0-5	α=1.0; HOS	0.647428	0.59177	0.505833	0.539534	0.524255	0.561764
		HRV	1	Age0-5	α=1.0; HOS	0.689214	0.597553	0.458455	0.488055	0.573084	0.561272
		HTI	7	Age0-5	α=1.0; HOS	0.65988	0.628882	0.507118	0.544637	0.557161	0.579535
		HUN	1	Age0-5	α=1.0; HOS	0.722053	0.578538	0.508397	0.486431	0.600942	0.579272
		IDN	6	Age0-5	α=1.0; HOS	0.736587	0.573733	0.468695	0.459793	0.604657	0.568693
		IND	6	Age0-5	α=1.0; HOS	0.837498	0.590104	0.560214	0.5894	0.703578	0.656159
		IRL	1	Age0-5	α=1.0; HOS	0.783285	0.580199	0.508576	0.531156	0.575886	0.59582
		IRN	6	Age0-5	α=1.0; HOS	0.656177	0.576498	0.455452	0.489147	0.55306	0.546067
		IRQ	5	Age0-5	α=1.0; HOS	0.803417	0.62646	0.492204	0.54926	0.662626	0.626793
		ISL	1	Age0-5	α=1.0; HOS	0.743577	0.585813	0.519299	0.486053	0.664654	0.599879
		ISR	5	Age0-5	α=1.0; HOS	0.671465	0.584286	0.479451	0.50031	0.534213	0.553945
		ITA	1	Age0-5	α=1.0; HOS	0.733683	0.594516	0.525551	0.497731	0.624931	0.595282
		JAM	7	Age0-5	α=1.0; HOS	0.750683	0.599329	0.608525	0.563571	0.676249	0.639671
		JOR	5	Age0-5	α=1.0; HOS	0.716903	0.607795	0.442628	0.500457	0.546637	0.562884
		JPN	3	Age0-5	α=1.0; HOS	0.753423	0.576517	0.558041	0.500693	0.622188	0.602172
		KAZ	5	Age0-5	α=1.0; HOS	0.728847	0.585211	0.515343	0.5152	0.620807	0.593082
		KEN	4	Age0-5	α=1.0; HOS	0.648345	0.622931	0.465142	0.504639	0.560268	0.560265
		KGZ	5	Age0-5	α=1.0; HOS	0.651047	0.577505	0.477097	0.476276	0.539946	0.544374
		KOR	3	Age0-5	α=1.0; HOS	0.657172	0.57878	0.437371	0.467835	0.523168	0.532865
		KWT	5	Age0-5	α=1.0; HOS	0.638948	0.575943	0.419146	0.475151	0.495436	0.520925
		LAO	6	Age0-5	α=1.0; HOS	0.776942	0.580782	0.441143	0.491962	0.546438	0.567453
		LCA	7	Age0-5	α=1.0; HOS	0.709331	0.586429	0.500593	0.494088	0.568621	0.571813
		LKA	6	Age0-5	α=1.0; HOS	0.815136	0.636761	0.487677	0.537619	0.709646	0.637368
		LTU	1	Age0-5	α=1.0; HOS	0.769017	0.581144	0.545616	0.523712	0.664234	0.616745
		LUX	1	Age0-5	α=1.0; HOS	0.647393	0.572701	0.438855	0.497558	0.494265	0.530154
		LVA	1	Age0-5	α=1.0; HOS	0.659374	0.574267	0.435543	0.509438	0.506159	0.536956
		MAR	5	Age0-5	α=1.0; HOS	0.652099	0.60129	0.440107	0.476423	0.557007	0.545385
		MDA	1	Age0-5	α=1.0; HOS	0.739772	0.580953	0.417862	0.489636	0.530339	0.551712
		MDG	4	Age0-5	α=1.0; HOS	0.73849	0.594777	0.493509	0.469099	0.615326	0.58224
		MDV	6	Age0-5	α=1.0; HOS	0.784252	0.605555	0.47858	0.505897	0.669365	0.60873
		MEX	7	Age0-5	α=1.0; HOS	0.646749	0.580177	0.424187	0.478111	0.507827	0.52741
		MKD	1	Age0-5	α=1.0; HOS	0.654085	0.595004	0.468147	0.510581	0.577698	0.561103
		MLI	4	Age0-5	α=1.0; HOS	0.673634	0.607805	0.461796	0.478905	0.57255	0.558938
		MLT	1	Age0-5	α=1.0; HOS	0.652673	0.600561	0.47068	0.495957	0.596159	0.563206
		MNE	1	Age0-5	α=1.0; HOS	0.660539	0.571486	0.440102	0.47964	0.514015	0.533156
		MNG	5	Age0-5	α=1.0; HOS	0.711113	0.585217	0.475415	0.481719	0.569579	0.564609
		MOZ	4	Age0-5	α=1.0; HOS	0.670631	0.57288	0.416317	0.48192	0.497461	0.527842
		MRT	4	Age0-5	α=1.0; HOS	0.655169	0.675007	0.504927	0.549506	0.57094	0.59111
		MUS	6	Age0-5	α=1.0; HOS	0.639746	0.575783	0.425916	0.465497	0.511704	0.523729
		MWI	4	Age0-5	α=1.0; HOS	0.657639	0.646849	0.494822	0.532179	0.579033	0.582105
		MYS	6	Age0-5	α=1.0; HOS	0.667018	0.6251	0.45325	0.511447	0.561145	0.563592
		NAM	4	Age0-5	α=1.0; HOS	0.823918	0.575869	0.476868	0.499544	0.564909	0.588222
		NER	4	Age0-5	α=1.0; HOS	0.629995	0.591494	0.467635	0.46713	0.526478	0.536546
		NGA	4	Age0-5	α=1.0; HOS	0.68102	0.577287	0.423207	0.483876	0.508341	0.534746
		NIC	7	Age0-5	α=1.0; HOS	0.677171	0.612069	0.451153	0.520994	0.517224	0.555722
		NLD	1	Age0-5	α=1.0; HOS	0.789523	0.580233	0.489623	0.512841	0.591795	0.592803
		NOR	1	Age0-5	α=1.0; HOS	0.604433	0.596547	0.517336	0.502154	0.575727	0.559239
		NPL	6	Age0-5	α=1.0; HOS	0.735451	0.6266	0.533171	0.534635	0.646648	0.615301
		NZL	2	Age0-5	α=1.0; HOS	0.694553	0.59312	0.437119	0.474243	0.537307	0.547268
		PAK	6	Age0-5	α=1.0; HOS	0.696858	0.654854	0.509039	0.55877	0.622417	0.608388
		PAN	7	Age0-5	α=1.0; HOS	0.742808	0.605906	0.478697	0.539854	0.543619	0.582177
		PER	7	Age0-5	α=1.0; HOS	0.730839	0.594575	0.495623	0.535161	0.571603	0.58556
		PHL	6	Age0-5	α=1.0; HOS	0.837475	0.663136	0.580992	0.578626	0.684172	0.66888
		POL	1	Age0-5	α=1.0; HOS	0.665167	0.59828	0.485271	0.503368	0.549948	0.560407
		PRT	1	Age0-5	α=1.0; HOS	0.850631	0.596755	0.551032	0.538438	0.693461	0.646063
		PRY	7	Age0-5	α=1.0; HOS	0.802367	0.613996	0.531318	0.494091	0.66089	0.620532
		PSE	5	Age0-5	α=1.0; HOS	0.787521	0.608331	0.511306	0.498771	0.690428	0.619272
		ROU	1	Age0-5	α=1.0; HOS	0.662949	0.597791	0.477605	0.497513	0.555376	0.558247
		RUS	1	Age0-5	α=1.0; HOS	0.681275	0.576586	0.437707	0.495596	0.508435	0.53992
		RWA	4	Age0-5	α=1.0; HOS	0.883733	0.717351	0.56958	0.645541	0.701938	0.703629
		SAU	5	Age0-5	α=1.0; HOS	0.640232	0.580303	0.445289	0.49171	0.511861	0.533879
		SDN	4	Age0-5	α=1.0; HOS	0.651306	0.577832	0.45576	0.477306	0.521134	0.536668
		SEN	4	Age0-5	α=1.0; HOS	0.666821	0.629263	0.46055	0.505223	0.571085	0.566588
		SLV	7	Age0-5	α=1.0; HOS	0.700717	0.589237	0.472716	0.523027	0.594572	0.576054
		SRB	1	Age0-5	α=1.0; HOS	0.651322	0.626004	0.469995	0.543447	0.548763	0.567906
		SUR	7	Age0-5	α=1.0; HOS	0.671337	0.619549	0.570644	0.607845	0.700938	0.634062
		SVK	1	Age0-5	α=1.0; HOS	0.630452	0.574486	0.448791	0.470874	0.50594	0.526109
		SVN	1	Age0-5	α=1.0; HOS	0.728106	0.604722	0.496675	0.478426	0.594583	0.580502
		SWE	1	Age0-5	α=1.0; HOS	0.741498	0.629872	0.51308	0.535071	0.610895	0.606083
		SWZ	4	Age0-5	α=1.0; HOS	0.852902	0.596214	0.494007	0.51082	0.625715	0.615931
		THA	6	Age0-5	α=1.0; HOS	0.681946	0.57523	0.439722	0.499594	0.518484	0.542995
		TJK	5	Age0-5	α=1.0; HOS	0.664337	0.613597	0.484283	0.536382	0.625035	0.584727
		TTO	7	Age0-5	α=1.0; HOS	0.631275	0.586098	0.441238	0.474315	0.523005	0.531186
		TUN	5	Age0-5	α=1.0; HOS	0.625116	0.57504	0.459475	0.471923	0.510297	0.52837
		TUR	5	Age0-5	α=1.0; HOS	0.688388	0.582721	0.494463	0.482391	0.6223	0.574053
		TZA	4	Age0-5	α=1.0; HOS	0.653295	0.603179	0.447603	0.487104	0.542547	0.546746
		UKR	1	Age0-5	α=1.0; HOS	0.639332	0.574678	0.43451	0.484499	0.502869	0.527178
		URY	7	Age0-5	α=1.0; HOS	0.788085	0.588423	0.511234	0.49796	0.672256	0.611592
		USA	2	Age0-5	α=1.0; HOS	0.752853	0.636752	0.596611	0.589168	0.728197	0.660716
		UZB	5	Age0-5	α=1.0; HOS	0.66862	0.584332	0.469357	0.508192	0.563841	0.558868
		VCT	7	Age0-5	α=1.0; HOS	0.89783	0.632688	0.642749	0.631011	0.77696	0.716248
		ZAF	4	Age0-5	α=1.0; HOS	0.709921	0.592139	0.469664	0.513905	0.5672	0.570566
		ZWE	4	Age0-5	α=1.0; HOS	0.675116	0.625236	0.440368	0.511127	0.517437	0.553857
		AGO	4	Age11-19	α=1.0; HOS	0.775607	0.555094	0.410139	0.445786	0.521437	0.541612
		ALB	1	Age11-19	α=1.0; HOS	1.01524	0.606304	0.724061	0.634342	0.630911	0.722171
		ARE	5	Age11-19	α=1.0; HOS	0.73501	0.576261	0.392749	0.430783	0.541639	0.535288
		ARG	7	Age11-19	α=1.0; HOS	0.749718	0.574857	0.468357	0.519248	0.460735	0.554583
		ARM	1	Age11-19	α=1.0; HOS	0.789792	0.575624	0.349533	0.470741	0.531053	0.543349
		ATG	7	Age11-19	α=1.0; HOS	1.03638	0.595345	0.759854	0.719678	0.605376	0.743326
		AUS	2	Age11-19	α=1.0; HOS	0.792169	0.608276	0.394745	0.502267	0.492597	0.558011
		AUT	1	Age11-19	α=1.0; HOS	0.69534	0.523356	0.350572	0.416429	0.456827	0.488505
		AZE	1	Age11-19	α=1.0; HOS	0.743475	0.58574	0.339999	0.47591	0.408998	0.510824
		BEL	1	Age11-19	α=1.0; HOS	0.721464	0.544583	0.341754	0.430698	0.436767	0.495053
		BEN	4	Age11-19	α=1.0; HOS	0.869678	0.536107	0.35504	0.421703	0.505637	0.537633
		BFA	4	Age11-19	α=1.0; HOS	0.712051	0.565667	0.379766	0.457633	0.461934	0.51541
		BGD	6	Age11-19	α=1.0; HOS	0.67076	0.55866	0.359382	0.458481	0.438402	0.497137
		BGR	1	Age11-19	α=1.0; HOS	0.688258	0.51536	0.440786	0.441426	0.461149	0.509396
		BHS	7	Age11-19	α=1.0; HOS	0.792228	0.540879	0.413192	0.484175	0.423244	0.530744
		BIH	1	Age11-19	α=1.0; HOS	0.667978	0.624758	0.352664	0.445332	0.461814	0.510509
		BLR	1	Age11-19	α=1.0; HOS	0.752291	0.566451	0.373312	0.471958	0.508557	0.534514
		BLZ	7	Age11-19	α=1.0; HOS	0.67644	0.549183	0.380401	0.443356	0.443131	0.498502
		BOL	7	Age11-19	α=1.0; HOS	0.817505	0.550479	0.415168	0.494325	0.453728	0.546241
		BRA	7	Age11-19	α=1.0; HOS	0.733431	0.535902	0.389473	0.421592	0.466432	0.509366
		BRB	7	Age11-19	α=1.0; HOS	0.694757	0.511203	0.345921	0.425549	0.43445	0.482376
		BRN	6	Age11-19	α=1.0; HOS	0.828607	0.556195	0.675683	0.608993	0.524034	0.638702
		BWA	4	Age11-19	α=1.0; HOS	0.736773	0.569992	0.365388	0.458324	0.486487	0.523393
		CAF	4	Age11-19	α=1.0; HOS	0.778911	0.575857	0.469903	0.55691	0.498769	0.57607
		CAN	2	Age11-19	α=1.0; HOS	0.796759	0.56415	0.391897	0.472591	0.475092	0.540098
		CHE	1	Age11-19	α=1.0; HOS	0.744619	0.522278	0.538157	0.474235	0.502103	0.556278
		CHL	7	Age11-19	α=1.0; HOS	1.02775	0.552672	0.565682	0.543589	0.618525	0.661643
		CHN	3	Age11-19	α=1.0; HOS	0.71805	0.56864	0.5721	0.518162	0.563381	0.588066
		CIV	4	Age11-19	α=1.0; HOS	0.912127	0.583309	0.4054	0.432598	0.613827	0.589452
		CMR	4	Age11-19	α=1.0; HOS	0.742798	0.53149	0.323884	0.409482	0.451298	0.49179
		COG	4	Age11-19	α=1.0; HOS	0.827561	0.518106	0.359483	0.407803	0.471215	0.516833
		COL	7	Age11-19	α=1.0; HOS	0.764093	0.531675	0.422652	0.469203	0.450316	0.527588
		CPV	4	Age11-19	α=1.0; HOS	0.745482	0.525076	0.360183	0.425113	0.436316	0.498434
		CRI	7	Age11-19	α=1.0; HOS	1.02121	0.57689	0.538686	0.567589	0.614637	0.663803
		CYP	1	Age11-19	α=1.0; HOS	0.714342	0.526049	0.417299	0.420768	0.460632	0.507818
		CZE	1	Age11-19	α=1.0; HOS	0.761755	0.598083	0.624846	0.541867	0.513955	0.608101
		DEU	1	Age11-19	α=1.0; HOS	0.727356	0.562026	0.388304	0.472498	0.457925	0.521622
		DJI	4	Age11-19	α=1.0; HOS	0.726002	0.626414	0.414444	0.480413	0.519625	0.55338
		DMA	7	Age11-19	α=1.0; HOS	0.804146	0.550086	0.395838	0.492218	0.425765	0.533611
		DNK	1	Age11-19	α=1.0; HOS	0.685245	0.576585	0.51719	0.461156	0.477284	0.543492
		DOM	7	Age11-19	α=1.0; HOS	0.742317	0.506653	0.521477	0.480581	0.43196	0.536597
		DZA	5	Age11-19	α=1.0; HOS	0.796511	0.626289	0.469831	0.537647	0.556947	0.597445
		ECU	7	Age11-19	α=1.0; HOS	0.752409	0.537795	0.455654	0.476841	0.473712	0.539282
		EGY	5	Age11-19	α=1.0; HOS	0.669562	0.51719	0.340055	0.411394	0.428562	0.473353
		ESP	1	Age11-19	α=1.0; HOS	0.691691	0.538914	0.52755	0.462231	0.51251	0.546579
		EST	1	Age11-19	α=1.0; HOS	0.729861	0.524546	0.373508	0.426173	0.417499	0.494318
		ETH	4	Age11-19	α=1.0; HOS	0.681221	0.541697	0.34097	0.444318	0.449764	0.491594
		FIN	1	Age11-19	α=1.0; HOS	0.801468	0.568583	0.590603	0.501035	0.575317	0.607401
		FJI	2	Age11-19	α=1.0; HOS	0.705203	0.514611	0.442785	0.427334	0.498536	0.517694
		FRA	1	Age11-19	α=1.0; HOS	0.726634	0.549197	0.522561	0.467611	0.526724	0.558545
		GBR	1	Age11-19	α=1.0; HOS	0.682573	0.526304	0.397714	0.4238	0.453928	0.496864
		GEO	1	Age11-19	α=1.0; HOS	0.850796	0.522161	0.377007	0.484659	0.421998	0.531324
		GHA	4	Age11-19	α=1.0; HOS	0.811874	0.518377	0.361601	0.43594	0.502335	0.526025
		GIN	4	Age11-19	α=1.0; HOS	0.725249	0.531655	0.34349	0.424517	0.433862	0.491755
		GMB	4	Age11-19	α=1.0; HOS	0.712921	0.543868	0.354592	0.460156	0.416937	0.497695
		GNB	4	Age11-19	α=1.0; HOS	0.948671	0.589438	0.480504	0.459395	0.614856	0.618573
		GRC	1	Age11-19	α=1.0; HOS	0.689122	0.507218	0.358105	0.408911	0.442921	0.481255
		GRD	7	Age11-19	α=1.0; HOS	1.02236	0.512205	0.595674	0.519915	0.606418	0.651315
		GUY	7	Age11-19	α=1.0; HOS	0.700321	0.482039	0.459508	0.42849	0.426638	0.499399
		HND	7	Age11-19	α=1.0; HOS	0.702209	0.536539	0.408024	0.473501	0.424604	0.508975
		HRV	1	Age11-19	α=1.0; HOS	0.718596	0.541373	0.425093	0.446491	0.462368	0.518784
		HTI	7	Age11-19	α=1.0; HOS	0.68973	0.54539	0.339237	0.408468	0.489642	0.494493
		HUN	1	Age11-19	α=1.0; HOS	0.791151	0.557115	0.610521	0.5323	0.537649	0.605747
		IDN	6	Age11-19	α=1.0; HOS	0.689261	0.580415	0.395659	0.451397	0.496982	0.522743
		IND	6	Age11-19	α=1.0; HOS	0.762746	0.557277	0.351844	0.409351	0.49546	0.515336
		IRL	1	Age11-19	α=1.0; HOS	0.794891	0.574163	0.613642	0.511607	0.544705	0.607802
		IRN	6	Age11-19	α=1.0; HOS	0.702277	0.533969	0.382977	0.418107	0.431383	0.493743
		IRQ	5	Age11-19	α=1.0; HOS	0.755342	0.614664	0.503514	0.569795	0.482979	0.585259
		ISL	1	Age11-19	α=1.0; HOS	0.85406	0.548583	0.625116	0.529272	0.538332	0.619072
		ISR	5	Age11-19	α=1.0; HOS	0.700134	0.56788	0.553375	0.485856	0.520011	0.565451
		ITA	1	Age11-19	α=1.0; HOS	0.734024	0.574238	0.39161	0.473527	0.471379	0.528956
		JAM	7	Age11-19	α=1.0; HOS	0.890893	0.582405	0.428097	0.534343	0.485328	0.584213
		JOR	5	Age11-19	α=1.0; HOS	0.668209	0.571025	0.380889	0.434161	0.464442	0.503745
		JPN	3	Age11-19	α=1.0; HOS	0.761271	0.533781	0.546129	0.484794	0.551507	0.575496
		KAZ	5	Age11-19	α=1.0; HOS	0.783295	0.619965	0.430514	0.498266	0.524288	0.571265
		KEN	4	Age11-19	α=1.0; HOS	0.661356	0.589672	0.361538	0.442373	0.496895	0.510367
		KGZ	5	Age11-19	α=1.0; HOS	0.726576	0.579288	0.343083	0.432737	0.454856	0.507308
		KOR	3	Age11-19	α=1.0; HOS	0.709219	0.523367	0.344798	0.405667	0.444562	0.485523
		KWT	5	Age11-19	α=1.0; HOS	0.711703	0.524215	0.331125	0.420262	0.407891	0.479039
		LAO	6	Age11-19	α=1.0; HOS	0.748123	0.524778	0.354648	0.425207	0.438562	0.498264
		LCA	7	Age11-19	α=1.0; HOS	0.767162	0.504418	0.409627	0.478807	0.419018	0.515806
		LKA	6	Age11-19	α=1.0; HOS	0.812947	0.565659	0.60888	0.594827	0.611499	0.638763
		LTU	1	Age11-19	α=1.0; HOS	0.768791	0.55816	0.366675	0.449739	0.420733	0.512819
		LUX	1	Age11-19	α=1.0; HOS	0.74271	0.533819	0.354534	0.433967	0.414549	0.495916
		LVA	1	Age11-19	α=1.0; HOS	0.772354	0.562735	0.341158	0.47026	0.505804	0.530462
		MAR	5	Age11-19	α=1.0; HOS	0.807221	0.529625	0.383675	0.423041	0.431361	0.514985
		MDA	1	Age11-19	α=1.0; HOS	0.74113	0.54547	0.365987	0.459733	0.419416	0.506347
		MDG	4	Age11-19	α=1.0; HOS	0.713365	0.56716	0.423544	0.460614	0.503558	0.533648
		MDV	6	Age11-19	α=1.0; HOS	0.961932	0.561129	0.36682	0.466944	0.539047	0.579174
		MEX	7	Age11-19	α=1.0; HOS	0.683593	0.515687	0.326662	0.416719	0.428779	0.474288
		MKD	1	Age11-19	α=1.0; HOS	0.730364	0.57437	0.370594	0.442207	0.480782	0.519663
		MLI	4	Age11-19	α=1.0; HOS	0.787022	0.605864	0.42022	0.49454	0.493804	0.56029
		MLT	1	Age11-19	α=1.0; HOS	0.757732	0.551506	0.563016	0.497345	0.519707	0.577861
		MNE	1	Age11-19	α=1.0; HOS	0.724081	0.563505	0.354435	0.428188	0.425293	0.4991
		MNG	5	Age11-19	α=1.0; HOS	0.723463	0.599237	0.362755	0.453413	0.435557	0.514885
		MOZ	4	Age11-19	α=1.0; HOS	0.795254	0.518962	0.336777	0.409292	0.43979	0.500015
		MRT	4	Age11-19	α=1.0; HOS	0.786256	0.66909	0.4317	0.592995	0.511604	0.598329
		MUS	6	Age11-19	α=1.0; HOS	0.704322	0.531255	0.352297	0.431719	0.406291	0.485177
		MWI	4	Age11-19	α=1.0; HOS	0.712763	0.538277	0.395697	0.434041	0.509045	0.517965
		MYS	6	Age11-19	α=1.0; HOS	0.751599	0.494914	0.35884	0.432962	0.427477	0.493158
		NAM	4	Age11-19	α=1.0; HOS	0.732375	0.538242	0.346372	0.418461	0.457669	0.498624
		NER	4	Age11-19	α=1.0; HOS	0.617002	0.468527	0.305694	0.433188	0.452434	0.455369
		NGA	4	Age11-19	α=1.0; HOS	0.821966	0.522803	0.334	0.418333	0.438436	0.507108
		NIC	7	Age11-19	α=1.0; HOS	0.704059	0.564314	0.405643	0.472074	0.45345	0.519908
		NLD	1	Age11-19	α=1.0; HOS	0.652334	0.566033	0.456879	0.448499	0.447427	0.514234
		NOR	1	Age11-19	α=1.0; HOS	0.700525	0.551981	0.570082	0.526547	0.493587	0.568544
		NPL	6	Age11-19	α=1.0; HOS	0.734925	0.656117	0.407973	0.517079	0.542852	0.571789
		NZL	2	Age11-19	α=1.0; HOS	0.68855	0.575409	0.370567	0.450846	0.469233	0.510921
		PAK	6	Age11-19	α=1.0; HOS	0.738825	0.620151	0.393824	0.522132	0.509202	0.556827
		PAN	7	Age11-19	α=1.0; HOS	0.721429	0.532365	0.346151	0.432703	0.436234	0.493776
		PER	7	Age11-19	α=1.0; HOS	0.745475	0.524121	0.596111	0.584936	0.550652	0.600259
		PHL	6	Age11-19	α=1.0; HOS	0.947748	0.574209	0.697522	0.690222	0.669847	0.71591
		POL	1	Age11-19	α=1.0; HOS	0.754626	0.540838	0.404609	0.453312	0.445269	0.519731
		PRT	1	Age11-19	α=1.0; HOS	0.999986	0.560316	0.629425	0.551673	0.66071	0.680422
		PRY	7	Age11-19	α=1.0; HOS	0.806358	0.590441	0.537183	0.480373	0.568	0.596471
		PSE	5	Age11-19	α=1.0; HOS	0.935832	0.683937	0.447535	0.44877	0.467009	0.596617
		ROU	1	Age11-19	α=1.0; HOS	0.759899	0.576211	0.37409	0.465322	0.448686	0.524842
		RUS	1	Age11-19	α=1.0; HOS	0.748534	0.580416	0.36737	0.464534	0.457109	0.523593
		RWA	4	Age11-19	α=1.0; HOS	0.837159	0.61737	0.469714	0.511323	0.61592	0.610297
		SAU	5	Age11-19	α=1.0; HOS	0.666589	0.542402	0.346629	0.439232	0.436331	0.486237
		SDN	4	Age11-19	α=1.0; HOS	0.650408	0.54682	0.424742	0.437047	0.476208	0.507045
		SEN	4	Age11-19	α=1.0; HOS	0.733349	0.583612	0.378924	0.466835	0.477663	0.528077
		SLV	7	Age11-19	α=1.0; HOS	0.788867	0.576487	0.420135	0.480798	0.492674	0.551792
		SRB	1	Age11-19	α=1.0; HOS	0.704382	0.571005	0.397366	0.457195	0.468811	0.519752
		SUR	7	Age11-19	α=1.0; HOS	0.981432	0.626414	0.483833	0.561284	0.614857	0.653564
		SVK	1	Age11-19	α=1.0; HOS	0.721334	0.543924	0.341933	0.432753	0.422797	0.492548
		SVN	1	Age11-19	α=1.0; HOS	0.783238	0.568854	0.407741	0.474996	0.459476	0.538861
		SWE	1	Age11-19	α=1.0; HOS	0.80173	0.5372	0.705258	0.592773	0.483827	0.624158
		SWZ	4	Age11-19	α=1.0; HOS	0.792273	0.582524	0.411414	0.453505	0.522917	0.552527
		THA	6	Age11-19	α=1.0; HOS	0.683089	0.540073	0.373471	0.441155	0.464427	0.500443
		TJK	5	Age11-19	α=1.0; HOS	0.769483	0.695259	0.393104	0.52276	0.483864	0.572894
		TTO	7	Age11-19	α=1.0; HOS	0.661246	0.503522	0.453303	0.440067	0.489332	0.509494
		TUN	5	Age11-19	α=1.0; HOS	0.68213	0.5071	0.326149	0.41423	0.411873	0.468296
		TUR	5	Age11-19	α=1.0; HOS	0.696087	0.600388	0.410379	0.453715	0.479384	0.52799
		TZA	4	Age11-19	α=1.0; HOS	0.706594	0.550617	0.355308	0.429777	0.464044	0.501268
		UKR	1	Age11-19	α=1.0; HOS	0.728647	0.53454	0.416572	0.43825	0.434223	0.510446
		URY	7	Age11-19	α=1.0; HOS	0.734126	0.597895	0.440804	0.476526	0.466561	0.543182
		USA	2	Age11-19	α=1.0; HOS	1.53386	0.588481	0.697471	0.594788	0.973928	0.877706
		UZB	5	Age11-19	α=1.0; HOS	0.708802	0.583656	0.368649	0.446073	0.430557	0.507547
		VCT	7	Age11-19	α=1.0; HOS	1.07666	0.553166	0.818907	0.772631	0.646696	0.773612
		ZAF	4	Age11-19	α=1.0; HOS	0.778194	0.560775	0.447207	0.414537	0.565291	0.553201
		ZWE	4	Age11-19	α=1.0; HOS	0.684193	0.56294	0.37108	0.458773	0.446696	0.504736
		AGO	4	Age20-44	α=1.0; HOS	0.837107	0.548618	0.396321	0.44353	0.505538	0.546223
		ALB	1	Age20-44	α=1.0; HOS	0.893846	0.636745	0.784442	0.718438	0.583074	0.723309
		ARE	5	Age20-44	α=1.0; HOS	0.802554	0.615668	0.366648	0.440588	0.491503	0.543392
		ARG	7	Age20-44	α=1.0; HOS	0.757509	0.571967	0.386817	0.487427	0.459774	0.532699
		ARM	1	Age20-44	α=1.0; HOS	0.71594	0.593736	0.341411	0.463379	0.446787	0.512251
		ATG	7	Age20-44	α=1.0; HOS	0.92088	0.553725	0.720804	0.694448	0.505339	0.679039
		AUS	2	Age20-44	α=1.0; HOS	0.861369	0.54653	0.564728	0.506731	0.559432	0.607758
		AUT	1	Age20-44	α=1.0; HOS	0.726556	0.556672	0.406007	0.437162	0.442976	0.513875
		AZE	1	Age20-44	α=1.0; HOS	0.733835	0.582393	0.332471	0.466066	0.431633	0.50928
		BEL	1	Age20-44	α=1.0; HOS	0.743967	0.532259	0.390198	0.424129	0.431313	0.504373
		BEN	4	Age20-44	α=1.0; HOS	0.759451	0.571794	0.384567	0.422529	0.507006	0.529069
		BFA	4	Age20-44	α=1.0; HOS	0.665303	0.613144	0.388453	0.470156	0.501447	0.527701
		BGD	6	Age20-44	α=1.0; HOS	0.689187	0.546929	0.339384	0.448788	0.434186	0.491695
		BGR	1	Age20-44	α=1.0; HOS	0.697655	0.542983	0.467686	0.461361	0.476109	0.529159
		BHS	7	Age20-44	α=1.0; HOS	0.718687	0.577027	0.326369	0.423932	0.443341	0.497871
		BIH	1	Age20-44	α=1.0; HOS	0.717631	0.621006	0.359706	0.469861	0.404221	0.514485
		BLR	1	Age20-44	α=1.0; HOS	0.773829	0.571473	0.347039	0.455129	0.440793	0.517653
		BLZ	7	Age20-44	α=1.0; HOS	0.701047	0.542841	0.394587	0.445372	0.407426	0.498255
		BOL	7	Age20-44	α=1.0; HOS	0.810187	0.583897	0.35702	0.459062	0.48241	0.538515
		BRA	7	Age20-44	α=1.0; HOS	0.752293	0.529594	0.403521	0.436082	0.43253	0.510804
		BRB	7	Age20-44	α=1.0; HOS	0.724693	0.538702	0.467334	0.436035	0.462014	0.525756
		BRN	6	Age20-44	α=1.0; HOS	0.880414	0.57574	0.364674	0.450989	0.458977	0.546159
		BWA	4	Age20-44	α=1.0; HOS	0.728225	0.585786	0.377041	0.427412	0.467856	0.517264
		CAF	4	Age20-44	α=1.0; HOS	0.888533	0.53493	0.410896	0.520114	0.437647	0.558424
		CAN	2	Age20-44	α=1.0; HOS	0.789347	0.565862	0.580342	0.519686	0.547249	0.600497
		CHE	1	Age20-44	α=1.0; HOS	0.823541	0.545253	0.602123	0.508734	0.501439	0.596218
		CHL	7	Age20-44	α=1.0; HOS	0.894584	0.564871	0.718675	0.686416	0.641019	0.701113
		CHN	3	Age20-44	α=1.0; HOS	0.71697	0.573333	0.580252	0.572658	0.528491	0.594341
		CIV	4	Age20-44	α=1.0; HOS	0.904259	0.63272	0.395197	0.467247	0.554429	0.59077
		CMR	4	Age20-44	α=1.0; HOS	0.747048	0.563903	0.344931	0.424765	0.442275	0.504584
		COG	4	Age20-44	α=1.0; HOS	0.803089	0.536466	0.341698	0.426545	0.450498	0.511659
		COL	7	Age20-44	α=1.0; HOS	0.740479	0.523117	0.471727	0.453285	0.451149	0.527951
		CPV	4	Age20-44	α=1.0; HOS	0.735142	0.540659	0.374793	0.424517	0.437678	0.502558
		CRI	7	Age20-44	α=1.0; HOS	0.964603	0.591333	0.69927	0.657395	0.684343	0.719389
		CYP	1	Age20-44	α=1.0; HOS	0.726111	0.55343	0.382111	0.423193	0.423778	0.501725
		CZE	1	Age20-44	α=1.0; HOS	0.807975	0.532992	0.561325	0.495772	0.516244	0.582862
		DEU	1	Age20-44	α=1.0; HOS	0.763187	0.551394	0.5749	0.496053	0.490131	0.575133
		DJI	4	Age20-44	α=1.0; HOS	0.708611	0.614954	0.405915	0.495609	0.477468	0.540511
		DMA	7	Age20-44	α=1.0; HOS	0.848228	0.544646	0.613024	0.517899	0.498769	0.604513
		DNK	1	Age20-44	α=1.0; HOS	0.670743	0.549241	0.36727	0.432301	0.446369	0.493185
		DOM	7	Age20-44	α=1.0; HOS	0.745266	0.553791	0.395641	0.491565	0.427399	0.522733
		DZA	5	Age20-44	α=1.0; HOS	0.709228	0.705437	0.348895	0.484729	0.479298	0.545517
		ECU	7	Age20-44	α=1.0; HOS	0.77688	0.54551	0.437903	0.478409	0.49507	0.546755
		EGY	5	Age20-44	α=1.0; HOS	0.652736	0.536138	0.356847	0.412369	0.43517	0.478652
		ESP	1	Age20-44	α=1.0; HOS	0.74798	0.555881	0.498876	0.452558	0.485918	0.548243
		EST	1	Age20-44	α=1.0; HOS	0.726081	0.533287	0.357945	0.420032	0.428271	0.493123
		ETH	4	Age20-44	α=1.0; HOS	0.731044	0.598378	0.370878	0.479453	0.460718	0.528094
		FIN	1	Age20-44	α=1.0; HOS	0.802877	0.559827	0.566625	0.490675	0.533217	0.590644
		FJI	2	Age20-44	α=1.0; HOS	0.700264	0.525822	0.424754	0.41398	0.455903	0.504145
		FRA	1	Age20-44	α=1.0; HOS	0.72727	0.549947	0.585608	0.530469	0.528109	0.584281
		GBR	1	Age20-44	α=1.0; HOS	0.739165	0.545177	0.412502	0.448919	0.421958	0.513544
		GEO	1	Age20-44	α=1.0; HOS	0.835208	0.599203	0.338925	0.475344	0.483774	0.546491
		GHA	4	Age20-44	α=1.0; HOS	0.827466	0.517843	0.330444	0.410026	0.454579	0.508072
		GIN	4	Age20-44	α=1.0; HOS	0.729877	0.544672	0.337957	0.427644	0.417498	0.49153
		GMB	4	Age20-44	α=1.0; HOS	0.819723	0.587241	0.323748	0.462656	0.477278	0.534129
		GNB	4	Age20-44	α=1.0; HOS	0.894753	0.653804	0.389509	0.479937	0.579608	0.599522
		GRC	1	Age20-44	α=1.0; HOS	0.692073	0.543995	0.356643	0.40955	0.439089	0.48827
		GRD	7	Age20-44	α=1.0; HOS	0.98153	0.571758	0.663648	0.632818	0.722728	0.714496
		GUY	7	Age20-44	α=1.0; HOS	0.705544	0.500274	0.419469	0.425187	0.414923	0.49308
		HND	7	Age20-44	α=1.0; HOS	0.714286	0.546817	0.39803	0.449177	0.407272	0.503117
		HRV	1	Age20-44	α=1.0; HOS	0.732349	0.547163	0.468046	0.456507	0.462216	0.533256
		HTI	7	Age20-44	α=1.0; HOS	0.757151	0.549743	0.378447	0.4633	0.477836	0.525295
		HUN	1	Age20-44	α=1.0; HOS	0.737505	0.558836	0.349154	0.452265	0.444315	0.508415
		IDN	6	Age20-44	α=1.0; HOS	0.687874	0.567564	0.461533	0.45514	0.478848	0.530192
		IND	6	Age20-44	α=1.0; HOS	0.752539	0.588029	0.351734	0.42895	0.489948	0.52224
		IRL	1	Age20-44	α=1.0; HOS	0.729192	0.544109	0.578458	0.514999	0.496187	0.572589
		IRN	6	Age20-44	α=1.0; HOS	0.714828	0.570669	0.354765	0.421318	0.432596	0.498835
		IRQ	5	Age20-44	α=1.0; HOS	0.806518	0.664291	0.418668	0.578979	0.553685	0.604428
		ISL	1	Age20-44	α=1.0; HOS	0.817159	0.551094	0.629995	0.566844	0.590023	0.631023
		ISR	5	Age20-44	α=1.0; HOS	0.708224	0.559971	0.569378	0.532062	0.481741	0.570275
		ITA	1	Age20-44	α=1.0; HOS	0.822589	0.571793	0.718959	0.673127	0.51128	0.65955
		JAM	7	Age20-44	α=1.0; HOS	0.915898	0.534117	0.562716	0.523667	0.600833	0.627446
		JOR	5	Age20-44	α=1.0; HOS	0.678783	0.594231	0.358275	0.444202	0.449597	0.505018
		JPN	3	Age20-44	α=1.0; HOS	0.746477	0.522625	0.521174	0.465667	0.513535	0.553896
		KAZ	5	Age20-44	α=1.0; HOS	0.770303	0.584951	0.60528	0.603703	0.505043	0.613856
		KEN	4	Age20-44	α=1.0; HOS	0.722533	0.547602	0.394119	0.468615	0.433142	0.513202
		KGZ	5	Age20-44	α=1.0; HOS	0.719555	0.560362	0.405471	0.452397	0.422207	0.511998
		KOR	3	Age20-44	α=1.0; HOS	0.720259	0.543979	0.342703	0.415505	0.425484	0.489586
		KWT	5	Age20-44	α=1.0; HOS	0.711984	0.531615	0.334607	0.425045	0.403005	0.481251
		LAO	6	Age20-44	α=1.0; HOS	0.760902	0.543373	0.345087	0.430352	0.425491	0.501041
		LCA	7	Age20-44	α=1.0; HOS	0.785122	0.517069	0.568159	0.501554	0.546501	0.583681
		LKA	6	Age20-44	α=1.0; HOS	0.836555	0.565566	0.43254	0.501695	0.507197	0.568711
		LTU	1	Age20-44	α=1.0; HOS	0.750584	0.558362	0.367249	0.44042	0.429532	0.509229
		LUX	1	Age20-44	α=1.0; HOS	0.756286	0.541799	0.355524	0.43417	0.410753	0.499706
		LVA	1	Age20-44	α=1.0; HOS	0.741994	0.57348	0.347401	0.46068	0.432927	0.511296
		MAR	5	Age20-44	α=1.0; HOS	0.76311	0.567415	0.374777	0.435329	0.433638	0.514853
		MDA	1	Age20-44	α=1.0; HOS	0.718339	0.585375	0.348277	0.46285	0.43441	0.50985
		MDG	4	Age20-44	α=1.0; HOS	0.682974	0.56346	0.381528	0.423136	0.50422	0.511064
		MDV	6	Age20-44	α=1.0; HOS	0.815836	0.572279	0.35225	0.468191	0.478028	0.537317
		MEX	7	Age20-44	α=1.0; HOS	0.686894	0.516622	0.361661	0.414292	0.422488	0.480391
		MKD	1	Age20-44	α=1.0; HOS	0.742208	0.583377	0.360557	0.446057	0.461228	0.518685
		MLI	4	Age20-44	α=1.0; HOS	0.703212	0.622789	0.369679	0.464717	0.464597	0.524999
		MLT	1	Age20-44	α=1.0; HOS	0.764232	0.553152	0.392093	0.437917	0.44252	0.517983
		MNE	1	Age20-44	α=1.0; HOS	0.749449	0.534139	0.362443	0.440508	0.397421	0.496792
		MNG	5	Age20-44	α=1.0; HOS	0.74497	0.595075	0.358764	0.456817	0.419022	0.514929
		MOZ	4	Age20-44	α=1.0; HOS	0.775562	0.534467	0.334499	0.419654	0.42025	0.496886
		MRT	4	Age20-44	α=1.0; HOS	0.712142	0.608878	0.388871	0.510592	0.512073	0.546511
		MUS	6	Age20-44	α=1.0; HOS	0.710753	0.542567	0.330567	0.426239	0.413597	0.484745
		MWI	4	Age20-44	α=1.0; HOS	0.732089	0.579126	0.356726	0.438516	0.466036	0.514498
		MYS	6	Age20-44	α=1.0; HOS	0.701938	0.583796	0.370845	0.475701	0.456239	0.517704
		NAM	4	Age20-44	α=1.0; HOS	0.785537	0.562852	0.343934	0.442167	0.423326	0.511563
		NER	4	Age20-44	α=1.0; HOS	0.62285	0.511721	0.330929	0.440405	0.438521	0.468885
		NGA	4	Age20-44	α=1.0; HOS	0.787914	0.528896	0.337153	0.42275	0.421954	0.499733
		NIC	7	Age20-44	α=1.0; HOS	0.707125	0.562415	0.382509	0.469777	0.432902	0.510946
		NLD	1	Age20-44	α=1.0; HOS	0.753556	0.542117	0.341746	0.416378	0.436709	0.498101
		NOR	1	Age20-44	α=1.0; HOS	0.715252	0.540757	0.536258	0.485756	0.502034	0.556011
		NPL	6	Age20-44	α=1.0; HOS	0.776731	0.665252	0.415679	0.52957	0.536924	0.584831
		NZL	2	Age20-44	α=1.0; HOS	0.763651	0.555867	0.39402	0.433369	0.443921	0.518166
		PAK	6	Age20-44	α=1.0; HOS	0.724581	0.633886	0.410519	0.548418	0.479421	0.559365
		PAN	7	Age20-44	α=1.0; HOS	0.702019	0.51349	0.374326	0.425797	0.419469	0.48702
		PER	7	Age20-44	α=1.0; HOS	0.724472	0.544225	0.359206	0.444851	0.426669	0.499885
		PHL	6	Age20-44	α=1.0; HOS	0.875652	0.571586	0.663999	0.646111	0.635287	0.678527
		POL	1	Age20-44	α=1.0; HOS	0.784903	0.566368	0.371627	0.441517	0.457802	0.524443
		PRT	1	Age20-44	α=1.0; HOS	1.0319	0.571643	0.680642	0.572219	0.62921	0.697122
		PRY	7	Age20-44	α=1.0; HOS	0.781386	0.654315	0.393014	0.528045	0.523432	0.576038
		PSE	5	Age20-44	α=1.0; HOS	1.18139	0.617108	0.470846	0.504896	0.602349	0.675318
		ROU	1	Age20-44	α=1.0; HOS	0.73452	0.56798	0.433955	0.452862	0.472325	0.532328
		RUS	1	Age20-44	α=1.0; HOS	0.765493	0.559696	0.350489	0.452447	0.422494	0.510124
		RWA	4	Age20-44	α=1.0; HOS	1.02258	0.596034	0.505784	0.541046	0.589265	0.650942
		SAU	5	Age20-44	α=1.0; HOS	0.661964	0.550411	0.335341	0.431983	0.430537	0.482047
		SDN	4	Age20-44	α=1.0; HOS	0.712363	0.518624	0.458382	0.440976	0.434351	0.512939
		SEN	4	Age20-44	α=1.0; HOS	0.775153	0.58992	0.331792	0.435409	0.484301	0.523315
		SLV	7	Age20-44	α=1.0; HOS	0.827285	0.566749	0.429729	0.475716	0.501437	0.560183
		SRB	1	Age20-44	α=1.0; HOS	0.724628	0.54676	0.422418	0.463439	0.438672	0.519184
		SUR	7	Age20-44	α=1.0; HOS	0.928022	0.632156	0.419642	0.499163	0.56709	0.609215
		SVK	1	Age20-44	α=1.0; HOS	0.691433	0.528482	0.358687	0.422006	0.429398	0.486001
		SVN	1	Age20-44	α=1.0; HOS	0.741455	0.557751	0.47721	0.456225	0.464988	0.539526
		SWE	1	Age20-44	α=1.0; HOS	0.732085	0.608125	0.405943	0.49952	0.468317	0.542798
		SWZ	4	Age20-44	α=1.0; HOS	0.876306	0.586763	0.441247	0.48094	0.597893	0.59663
		THA	6	Age20-44	α=1.0; HOS	0.738239	0.554299	0.539731	0.476704	0.529247	0.567644
		TJK	5	Age20-44	α=1.0; HOS	0.756578	0.729601	0.44769	0.570799	0.479997	0.596933
		TTO	7	Age20-44	α=1.0; HOS	0.696292	0.522436	0.483059	0.443593	0.486637	0.526403
		TUN	5	Age20-44	α=1.0; HOS	0.696972	0.522569	0.327881	0.422644	0.399071	0.473828
		TUR	5	Age20-44	α=1.0; HOS	0.710169	0.615759	0.377091	0.448748	0.46549	0.523451
		TZA	4	Age20-44	α=1.0; HOS	0.720666	0.568736	0.337358	0.446328	0.456027	0.505823
		UKR	1	Age20-44	α=1.0; HOS	0.736353	0.556267	0.401525	0.422574	0.478724	0.519089
		URY	7	Age20-44	α=1.0; HOS	0.798001	0.540103	0.457385	0.466014	0.47846	0.547993
		USA	2	Age20-44	α=1.0; HOS	0.913446	0.569307	0.464225	0.49141	0.57946	0.603569
		UZB	5	Age20-44	α=1.0; HOS	0.735842	0.56439	0.388565	0.452811	0.406202	0.509562
		VCT	7	Age20-44	α=1.0; HOS	1.26965	0.576605	0.677648	0.576481	0.677318	0.755541
		ZAF	4	Age20-44	α=1.0; HOS	0.726028	0.60547	0.412312	0.458094	0.489855	0.538352
		ZWE	4	Age20-44	α=1.0; HOS	0.715295	0.562933	0.340141	0.450708	0.447143	0.503244
		AGO	4	Age45-59	α=1.0; HOS	0.783941	0.559516	0.372647	0.415187	0.492194	0.524697
		ALB	1	Age45-59	α=1.0; HOS	0.865053	0.605249	0.441387	0.476363	0.544753	0.586561
		ARE	5	Age45-59	α=1.0; HOS	0.72982	0.605606	0.39336	0.429964	0.525254	0.536801
		ARG	7	Age45-59	α=1.0; HOS	0.725971	0.527154	0.426939	0.44826	0.435265	0.512718
		ARM	1	Age45-59	α=1.0; HOS	0.71759	0.590671	0.338705	0.476195	0.431777	0.510988
		ATG	7	Age45-59	α=1.0; HOS	1.02627	0.538491	0.551074	0.478082	0.528335	0.624451
		AUS	2	Age45-59	α=1.0; HOS	0.857422	0.568946	0.569727	0.483358	0.584878	0.612866
		AUT	1	Age45-59	α=1.0; HOS	0.696147	0.549064	0.451961	0.42414	0.497486	0.52376
		AZE	1	Age45-59	α=1.0; HOS	0.730793	0.591953	0.336306	0.471869	0.419587	0.510102
		BEL	1	Age45-59	α=1.0; HOS	0.71684	0.546409	0.34929	0.412682	0.44217	0.493478
		BEN	4	Age45-59	α=1.0; HOS	0.731074	0.566482	0.393974	0.422983	0.490378	0.520978
		BFA	4	Age45-59	α=1.0; HOS	0.761638	0.583909	0.352542	0.459963	0.492828	0.530176
		BGD	6	Age45-59	α=1.0; HOS	0.647257	0.610259	0.35103	0.439655	0.461599	0.50196
		BGR	1	Age45-59	α=1.0; HOS	0.663329	0.528616	0.427057	0.42514	0.444167	0.497662
		BHS	7	Age45-59	α=1.0; HOS	0.698995	0.598626	0.368124	0.474066	0.460091	0.519981
		BIH	1	Age45-59	α=1.0; HOS	0.730848	0.613873	0.368691	0.473662	0.427196	0.522854
		BLR	1	Age45-59	α=1.0; HOS	0.700931	0.556303	0.419815	0.46042	0.449716	0.517437
		BLZ	7	Age45-59	α=1.0; HOS	0.684224	0.530497	0.418289	0.464364	0.411975	0.50187
		BOL	7	Age45-59	α=1.0; HOS	0.792364	0.563009	0.524444	0.490573	0.518953	0.577869
		BRA	7	Age45-59	α=1.0; HOS	0.729009	0.537057	0.366183	0.428685	0.437446	0.499676
		BRB	7	Age45-59	α=1.0; HOS	0.714546	0.549972	0.535896	0.464867	0.50676	0.554408
		BRN	6	Age45-59	α=1.0; HOS	0.797482	0.580886	0.412846	0.438079	0.45321	0.536501
		BWA	4	Age45-59	α=1.0; HOS	0.723913	0.565953	0.383748	0.446178	0.465126	0.516983
		CAF	4	Age45-59	α=1.0; HOS	0.901062	0.565281	0.416449	0.544551	0.54156	0.593781
		CAN	2	Age45-59	α=1.0; HOS	0.809069	0.548483	0.546355	0.472948	0.550071	0.585385
		CHE	1	Age45-59	α=1.0; HOS	0.760289	0.552193	0.579772	0.502801	0.523108	0.583633
		CHL	7	Age45-59	α=1.0; HOS	1.04345	0.576186	0.615156	0.510927	0.675987	0.684341
		CHN	3	Age45-59	α=1.0; HOS	0.687603	0.590807	0.59227	0.518633	0.556463	0.589155
		CIV	4	Age45-59	α=1.0; HOS	0.756916	0.564392	0.410405	0.415628	0.514189	0.532306
		CMR	4	Age45-59	α=1.0; HOS	0.716511	0.568159	0.367088	0.414922	0.462927	0.505921
		COG	4	Age45-59	α=1.0; HOS	0.770774	0.539803	0.348462	0.434701	0.425622	0.503873
		COL	7	Age45-59	α=1.0; HOS	0.73581	0.531846	0.405331	0.447733	0.44026	0.512196
		CPV	4	Age45-59	α=1.0; HOS	0.713563	0.542875	0.37161	0.420293	0.445335	0.498735
		CRI	7	Age45-59	α=1.0; HOS	0.841384	0.597726	0.446959	0.487885	0.581525	0.591096
		CYP	1	Age45-59	α=1.0; HOS	0.695551	0.556682	0.427668	0.424225	0.46615	0.514055
		CZE	1	Age45-59	α=1.0; HOS	0.814523	0.562356	0.611051	0.51869	0.514974	0.604319
		DEU	1	Age45-59	α=1.0; HOS	0.734001	0.595267	0.361134	0.439798	0.45115	0.51627
		DJI	4	Age45-59	α=1.0; HOS	0.714866	0.662753	0.371683	0.477761	0.489637	0.54334
		DMA	7	Age45-59	α=1.0; HOS	0.821829	0.549898	0.606014	0.539658	0.540753	0.611631
		DNK	1	Age45-59	α=1.0; HOS	0.704447	0.572587	0.518817	0.461047	0.49015	0.54941
		DOM	7	Age45-59	α=1.0; HOS	0.718699	0.538018	0.443734	0.481947	0.429667	0.522413
		DZA	5	Age45-59	α=1.0; HOS	0.689837	0.634404	0.435052	0.496473	0.490778	0.549309
		ECU	7	Age45-59	α=1.0; HOS	0.710523	0.540559	0.438393	0.453365	0.465106	0.521589
		EGY	5	Age45-59	α=1.0; HOS	0.654429	0.538434	0.405626	0.412319	0.451961	0.492554
		ESP	1	Age45-59	α=1.0; HOS	0.749529	0.558103	0.538328	0.4612	0.517112	0.564854
		EST	1	Age45-59	α=1.0; HOS	0.712799	0.528854	0.369934	0.41841	0.42664	0.491327
		ETH	4	Age45-59	α=1.0; HOS	0.668589	0.652305	0.391578	0.489896	0.50825	0.542124
		FIN	1	Age45-59	α=1.0; HOS	0.783537	0.543068	0.518324	0.483278	0.53208	0.572057
		FJI	2	Age45-59	α=1.0; HOS	0.663601	0.576184	0.362385	0.418653	0.465753	0.497315
		FRA	1	Age45-59	α=1.0; HOS	0.699762	0.571803	0.354714	0.423732	0.466785	0.503359
		GBR	1	Age45-59	α=1.0; HOS	0.730193	0.540348	0.394401	0.424801	0.450042	0.507957
		GEO	1	Age45-59	α=1.0; HOS	0.759148	0.585041	0.328262	0.456646	0.445042	0.514828
		GHA	4	Age45-59	α=1.0; HOS	0.788729	0.527002	0.326729	0.409129	0.458346	0.501987
		GIN	4	Age45-59	α=1.0; HOS	0.713204	0.544823	0.339775	0.428554	0.431467	0.491565
		GMB	4	Age45-59	α=1.0; HOS	1.19343	0.671472	0.40065	0.574963	0.845684	0.73724
		GNB	4	Age45-59	α=1.0; HOS	0.839697	0.635478	0.370452	0.464127	0.526523	0.567255
		GRC	1	Age45-59	α=1.0; HOS	0.689688	0.532995	0.366124	0.402945	0.441995	0.486749
		GRD	7	Age45-59	α=1.0; HOS	0.893503	0.563369	0.671976	0.628115	0.703286	0.69205
		GUY	7	Age45-59	α=1.0; HOS	0.645078	0.559418	0.348684	0.431438	0.436093	0.484142
		HND	7	Age45-59	α=1.0; HOS	0.706443	0.534788	0.405819	0.458067	0.419188	0.504861
		HRV	1	Age45-59	α=1.0; HOS	0.730207	0.546312	0.488712	0.46969	0.467764	0.540537
		HTI	7	Age45-59	α=1.0; HOS	0.695134	0.620639	0.387887	0.465485	0.513289	0.536487
		HUN	1	Age45-59	α=1.0; HOS	0.709503	0.586321	0.585323	0.512194	0.527091	0.584086
		IDN	6	Age45-59	α=1.0; HOS	0.776053	0.578278	0.581366	0.514774	0.584919	0.607078
		IND	6	Age45-59	α=1.0; HOS	0.727152	0.573317	0.334535	0.410235	0.463387	0.501725
		IRL	1	Age45-59	α=1.0; HOS	0.663315	0.584716	0.574111	0.474767	0.504014	0.560185
		IRN	6	Age45-59	α=1.0; HOS	0.710455	0.598405	0.375735	0.443015	0.424462	0.510414
		IRQ	5	Age45-59	α=1.0; HOS	0.745858	0.662678	0.447465	0.615878	0.506447	0.595665
		ISL	1	Age45-59	α=1.0; HOS	0.763116	0.589142	0.612854	0.509922	0.55303	0.605613
		ISR	5	Age45-59	α=1.0; HOS	0.727543	0.566779	0.361846	0.439904	0.438771	0.506969
		ITA	1	Age45-59	α=1.0; HOS	0.774542	0.544608	0.415421	0.431241	0.433584	0.519879
		JAM	7	Age45-59	α=1.0; HOS	0.836776	0.58095	0.619131	0.539992	0.549774	0.625325
		JOR	5	Age45-59	α=1.0; HOS	0.633283	0.597703	0.41964	0.439021	0.492124	0.516354
		JPN	3	Age45-59	α=1.0; HOS	0.786226	0.531215	0.354975	0.407805	0.479716	0.511987
		KAZ	5	Age45-59	α=1.0; HOS	0.705816	0.6033	0.618721	0.586081	0.526634	0.60811
		KEN	4	Age45-59	α=1.0; HOS	0.66231	0.578569	0.369634	0.426964	0.500084	0.507512
		KGZ	5	Age45-59	α=1.0; HOS	0.687971	0.575412	0.417694	0.464977	0.447075	0.518626
		KOR	3	Age45-59	α=1.0; HOS	0.694874	0.529856	0.349065	0.406974	0.435958	0.483346
		KWT	5	Age45-59	α=1.0; HOS	0.7028	0.533432	0.33761	0.426147	0.404167	0.480831
		LAO	6	Age45-59	α=1.0; HOS	0.71891	0.547427	0.346192	0.427522	0.426255	0.493261
		LCA	7	Age45-59	α=1.0; HOS	0.745961	0.549741	0.370636	0.48538	0.443543	0.519052
		LKA	6	Age45-59	α=1.0; HOS	0.818656	0.592095	0.449575	0.482973	0.512275	0.571115
		LTU	1	Age45-59	α=1.0; HOS	0.735926	0.561726	0.34378	0.444393	0.424516	0.502068
		LUX	1	Age45-59	α=1.0; HOS	0.728472	0.545071	0.356238	0.430689	0.425202	0.497134
		LVA	1	Age45-59	α=1.0; HOS	0.750884	0.565935	0.345353	0.459266	0.434992	0.511286
		MAR	5	Age45-59	α=1.0; HOS	0.725564	0.562536	0.381736	0.423321	0.459329	0.510497
		MDA	1	Age45-59	α=1.0; HOS	0.708478	0.559299	0.354155	0.449249	0.423021	0.498841
		MDG	4	Age45-59	α=1.0; HOS	0.739739	0.552539	0.403284	0.439319	0.521542	0.531285
		MDV	6	Age45-59	α=1.0; HOS	0.798131	0.592866	0.358271	0.441753	0.52133	0.54247
		MEX	7	Age45-59	α=1.0; HOS	0.678445	0.520373	0.364409	0.415267	0.425607	0.48082
		MKD	1	Age45-59	α=1.0; HOS	0.716026	0.564606	0.527892	0.465035	0.519781	0.558668
		MLI	4	Age45-59	α=1.0; HOS	0.736902	0.594207	0.42368	0.445939	0.524342	0.545014
		MLT	1	Age45-59	α=1.0; HOS	0.717671	0.585183	0.376351	0.421451	0.508825	0.521896
		MNE	1	Age45-59	α=1.0; HOS	0.699001	0.557701	0.371315	0.436509	0.420474	0.497
		MNG	5	Age45-59	α=1.0; HOS	0.721619	0.606599	0.3513	0.453623	0.443517	0.515332
		MOZ	4	Age45-59	α=1.0; HOS	0.760732	0.533385	0.331385	0.419019	0.425058	0.493916
		MRT	4	Age45-59	α=1.0; HOS	0.640395	0.572202	0.47458	0.479569	0.49287	0.531923
		MUS	6	Age45-59	α=1.0; HOS	0.675342	0.537681	0.378152	0.418214	0.43283	0.488444
		MWI	4	Age45-59	α=1.0; HOS	0.740317	0.553822	0.38124	0.433346	0.509395	0.523624
		MYS	6	Age45-59	α=1.0; HOS	0.682103	0.522819	0.441456	0.486181	0.450044	0.516521
		NAM	4	Age45-59	α=1.0; HOS	0.734337	0.551659	0.359079	0.439994	0.447044	0.506423
		NER	4	Age45-59	α=1.0; HOS	0.637417	0.522655	0.317898	0.43402	0.431577	0.468713
		NGA	4	Age45-59	α=1.0; HOS	0.763535	0.531935	0.339276	0.423256	0.419897	0.49558
		NIC	7	Age45-59	α=1.0; HOS	0.697588	0.554242	0.392348	0.440496	0.434904	0.503916
		NLD	1	Age45-59	α=1.0; HOS	0.745763	0.552568	0.366216	0.436202	0.415383	0.503226
		NOR	1	Age45-59	α=1.0; HOS	0.696251	0.538627	0.526122	0.479384	0.527632	0.553603
		NPL	6	Age45-59	α=1.0; HOS	0.751909	0.639382	0.393729	0.510367	0.557589	0.570595
		NZL	2	Age45-59	α=1.0; HOS	0.734248	0.549969	0.373223	0.418942	0.453842	0.506045
		PAK	6	Age45-59	α=1.0; HOS	0.680139	0.622929	0.422533	0.544798	0.480477	0.550175
		PAN	7	Age45-59	α=1.0; HOS	0.717358	0.539344	0.398867	0.436237	0.426311	0.503624
		PER	7	Age45-59	α=1.0; HOS	0.717306	0.547366	0.38945	0.45172	0.44194	0.509556
		PHL	6	Age45-59	α=1.0; HOS	0.750142	0.631368	0.324116	0.436075	0.539519	0.536244
		POL	1	Age45-59	α=1.0; HOS	0.736921	0.55148	0.382398	0.436025	0.452774	0.51192
		PRT	1	Age45-59	α=1.0; HOS	0.963408	0.578673	0.637554	0.531143	0.66074	0.674303
		PRY	7	Age45-59	α=1.0; HOS	0.72646	0.620219	0.422954	0.466198	0.465217	0.54021
		PSE	5	Age45-59	α=1.0; HOS	0.875313	0.693113	0.412885	0.445936	0.447298	0.574909
		ROU	1	Age45-59	α=1.0; HOS	0.725793	0.576776	0.390395	0.437916	0.453744	0.516925
		RUS	1	Age45-59	α=1.0; HOS	0.713822	0.551925	0.531447	0.488533	0.477309	0.552607
		RWA	4	Age45-59	α=1.0; HOS	1.05838	0.612414	0.554037	0.490204	0.766952	0.696397
		SAU	5	Age45-59	α=1.0; HOS	0.65851	0.556816	0.34618	0.436824	0.437517	0.487169
		SDN	4	Age45-59	α=1.0; HOS	0.649915	0.559899	0.399368	0.424374	0.460844	0.49888
		SEN	4	Age45-59	α=1.0; HOS	0.769111	0.621942	0.368511	0.48019	0.515037	0.550958
		SLV	7	Age45-59	α=1.0; HOS	0.744804	0.557059	0.429737	0.468484	0.467782	0.533573
		SRB	1	Age45-59	α=1.0; HOS	0.681277	0.585308	0.381416	0.475427	0.439194	0.512525
		SUR	7	Age45-59	α=1.0; HOS	0.933108	0.59018	0.467245	0.520624	0.538045	0.609841
		SVK	1	Age45-59	α=1.0; HOS	0.705038	0.533688	0.338506	0.420938	0.415622	0.482758
		SVN	1	Age45-59	α=1.0; HOS	0.768758	0.545698	0.397141	0.438789	0.435829	0.517243
		SWE	1	Age45-59	α=1.0; HOS	0.740651	0.569745	0.392049	0.4463	0.477855	0.52532
		SWZ	4	Age45-59	α=1.0; HOS	0.848146	0.619934	0.378329	0.453727	0.547314	0.56949
		THA	6	Age45-59	α=1.0; HOS	0.690294	0.562884	0.363271	0.421519	0.438908	0.495375
		TJK	5	Age45-59	α=1.0; HOS	0.698462	0.6256	0.358024	0.458789	0.49974	0.528123
		TTO	7	Age45-59	α=1.0; HOS	0.676551	0.527893	0.442018	0.429609	0.461273	0.507469
		TUN	5	Age45-59	α=1.0; HOS	0.684618	0.527018	0.33132	0.419639	0.408466	0.474212
		TUR	5	Age45-59	α=1.0; HOS	0.675946	0.627424	0.389792	0.446822	0.47956	0.523909
		TZA	4	Age45-59	α=1.0; HOS	0.684043	0.553376	0.365032	0.434906	0.461142	0.4997
		UKR	1	Age45-59	α=1.0; HOS	0.705272	0.545932	0.428927	0.435338	0.453391	0.513772
		URY	7	Age45-59	α=1.0; HOS	0.646328	0.585921	0.430864	0.465279	0.483685	0.522415
		USA	2	Age45-59	α=1.0; HOS	0.925354	0.567742	0.548953	0.49318	0.628587	0.632763
		UZB	5	Age45-59	α=1.0; HOS	0.702119	0.57906	0.379557	0.478719	0.412339	0.510359
		VCT	7	Age45-59	α=1.0; HOS	1.13691	0.562801	0.771184	0.67969	0.715328	0.773182
		ZAF	4	Age45-59	α=1.0; HOS	0.778843	0.581499	0.436063	0.483396	0.497825	0.555525
		ZWE	4	Age45-59	α=1.0; HOS	0.668648	0.620528	0.359058	0.457387	0.502288	0.521582
		AGO	4	Age60+	α=1.0; HOS	0.795091	0.540422	0.389707	0.433779	0.506743	0.533149
		ALB	1	Age60+	α=1.0; HOS	1.00283	0.651454	0.627837	0.521866	0.638978	0.688592
		ARE	5	Age60+	α=1.0; HOS	0.715122	0.581902	0.35867	0.408677	0.555504	0.523975
		ARG	7	Age60+	α=1.0; HOS	0.74196	0.540518	0.441265	0.474652	0.45232	0.530143
		ARM	1	Age60+	α=1.0; HOS	0.718539	0.597822	0.341361	0.479429	0.422842	0.511999
		ATG	7	Age60+	α=1.0; HOS	0.82201	0.618882	0.514105	0.531109	0.532963	0.603814
		AUS	2	Age60+	α=1.0; HOS	0.911784	0.577623	0.624649	0.520613	0.606267	0.648187
		AUT	1	Age60+	α=1.0; HOS	0.711349	0.541735	0.422593	0.420099	0.459069	0.510969
		AZE	1	Age60+	α=1.0; HOS	0.730393	0.60305	0.342489	0.473217	0.419905	0.513811
		BEL	1	Age60+	α=1.0; HOS	0.718939	0.531173	0.341638	0.410998	0.438915	0.488332
		BEN	4	Age60+	α=1.0; HOS	0.794043	0.535875	0.346729	0.405637	0.485017	0.51346
		BFA	4	Age60+	α=1.0; HOS	0.728092	0.582177	0.367306	0.447625	0.472403	0.51952
		BGD	6	Age60+	α=1.0; HOS	0.62264	0.569799	0.39176	0.452719	0.473433	0.50207
		BGR	1	Age60+	α=1.0; HOS	0.666444	0.532855	0.35566	0.422939	0.427809	0.481141
		BHS	7	Age60+	α=1.0; HOS	0.716322	0.534997	0.413461	0.463038	0.43301	0.512166
		BIH	1	Age60+	α=1.0; HOS	0.717148	0.596527	0.367709	0.451732	0.428296	0.512282
		BLR	1	Age60+	α=1.0; HOS	0.707563	0.559351	0.399326	0.456961	0.442569	0.513154
		BLZ	7	Age60+	α=1.0; HOS	0.68602	0.541123	0.363684	0.43484	0.421884	0.48951
		BOL	7	Age60+	α=1.0; HOS	0.783144	0.528567	0.534592	0.483358	0.477392	0.561411
		BRA	7	Age60+	α=1.0; HOS	0.721098	0.55472	0.348595	0.434019	0.4466	0.501007
		BRB	7	Age60+	α=1.0; HOS	0.700685	0.533707	0.525994	0.466189	0.479392	0.541193
		BRN	6	Age60+	α=1.0; HOS	1.26994	0.590086	0.557586	0.535104	0.698679	0.730278
		BWA	4	Age60+	α=1.0; HOS	0.757743	0.584442	0.369514	0.466354	0.484686	0.532548
		CAF	4	Age60+	α=1.0; HOS	0.856109	0.567542	0.438604	0.539609	0.55045	0.590463
		CAN	2	Age60+	α=1.0; HOS	0.737779	0.552164	0.529867	0.466592	0.534751	0.56423
		CHE	1	Age60+	α=1.0; HOS	0.687316	0.60026	0.627243	0.52055	0.531732	0.59342
		CHL	7	Age60+	α=1.0; HOS	0.893965	0.555256	0.676456	0.620745	0.639722	0.677229
		CHN	3	Age60+	α=1.0; HOS	0.710942	0.553329	0.473665	0.448182	0.476414	0.532506
		CIV	4	Age60+	α=1.0; HOS	0.847176	0.580167	0.427327	0.440045	0.593207	0.577584
		CMR	4	Age60+	α=1.0; HOS	0.687981	0.53123	0.349598	0.426192	0.450943	0.489189
		COG	4	Age60+	α=1.0; HOS	0.76924	0.531061	0.342283	0.41442	0.459151	0.503231
		COL	7	Age60+	α=1.0; HOS	0.73356	0.521541	0.396859	0.449418	0.461861	0.512647
		CPV	4	Age60+	α=1.0; HOS	0.711939	0.537858	0.355504	0.416998	0.446714	0.493803
		CRI	7	Age60+	α=1.0; HOS	0.972135	0.574724	0.732942	0.620548	0.621122	0.704294
		CYP	1	Age60+	α=1.0; HOS	0.707321	0.540793	0.476977	0.430158	0.475475	0.526145
		CZE	1	Age60+	α=1.0; HOS	0.74735	0.525626	0.500282	0.449197	0.558865	0.556264
		DEU	1	Age60+	α=1.0; HOS	0.714081	0.531451	0.513776	0.45946	0.516907	0.547135
		DJI	4	Age60+	α=1.0; HOS	0.663424	0.597226	0.37376	0.455614	0.482438	0.514492
		DMA	7	Age60+	α=1.0; HOS	0.813814	0.540815	0.447502	0.509523	0.463451	0.555021
		DNK	1	Age60+	α=1.0; HOS	0.667392	0.577358	0.396532	0.432748	0.442367	0.503279
		DOM	7	Age60+	α=1.0; HOS	0.742828	0.528229	0.561858	0.490646	0.481424	0.560997
		DZA	5	Age60+	α=1.0; HOS	0.717502	0.629949	0.429264	0.513801	0.530788	0.564261
		ECU	7	Age60+	α=1.0; HOS	0.757822	0.546963	0.43261	0.45012	0.509058	0.539315
		EGY	5	Age60+	α=1.0; HOS	0.661756	0.540548	0.362809	0.422729	0.442172	0.486003
		ESP	1	Age60+	α=1.0; HOS	0.730552	0.540838	0.51804	0.443714	0.514972	0.549623
		EST	1	Age60+	α=1.0; HOS	0.684404	0.530862	0.393133	0.409226	0.451684	0.493862
		ETH	4	Age60+	α=1.0; HOS	0.6074	0.596797	0.359945	0.445267	0.498671	0.501616
		FIN	1	Age60+	α=1.0; HOS	0.70621	0.552966	0.652215	0.61606	0.565219	0.618534
		FJI	2	Age60+	α=1.0; HOS	0.685186	0.528416	0.32998	0.41915	0.43416	0.479379
		FRA	1	Age60+	α=1.0; HOS	0.713687	0.55284	0.530594	0.465041	0.549337	0.5623
		GBR	1	Age60+	α=1.0; HOS	0.677593	0.538913	0.384963	0.414099	0.466064	0.496326
		GEO	1	Age60+	α=1.0; HOS	0.768669	0.559472	0.352029	0.464671	0.419787	0.512926
		GHA	4	Age60+	α=1.0; HOS	0.797119	0.500758	0.333484	0.405126	0.477185	0.502735
		GIN	4	Age60+	α=1.0; HOS	0.700974	0.534045	0.348336	0.420037	0.425001	0.485678
		GMB	4	Age60+	α=1.0; HOS	0.726444	0.53627	0.337314	0.434042	0.427761	0.492366
		GNB	4	Age60+	α=1.0; HOS	0.851619	0.560748	0.440335	0.457499	0.607026	0.583445
		GRC	1	Age60+	α=1.0; HOS	0.669513	0.517041	0.364369	0.399948	0.447016	0.479577
		GRD	7	Age60+	α=1.0; HOS	0.861976	0.557843	0.663814	0.598296	0.740779	0.684541
		GUY	7	Age60+	α=1.0; HOS	0.683458	0.503493	0.431127	0.417517	0.418213	0.490761
		HND	7	Age60+	α=1.0; HOS	0.682217	0.533493	0.407791	0.465321	0.420677	0.5019
		HRV	1	Age60+	α=1.0; HOS	0.687626	0.541269	0.438805	0.425991	0.474497	0.513638
		HTI	7	Age60+	α=1.0; HOS	0.74314	0.541365	0.600466	0.533216	0.508163	0.58527
		HUN	1	Age60+	α=1.0; HOS	0.782015	0.539539	0.566886	0.489726	0.560289	0.587691
		IDN	6	Age60+	α=1.0; HOS	0.769476	0.551803	0.442538	0.423452	0.639671	0.565388
		IND	6	Age60+	α=1.0; HOS	0.713212	0.56594	0.348875	0.413708	0.490407	0.506428
		IRL	1	Age60+	α=1.0; HOS	0.703644	0.582861	0.506969	0.445646	0.480439	0.543912
		IRN	6	Age60+	α=1.0; HOS	0.649375	0.602074	0.393126	0.424097	0.47776	0.509287
		IRQ	5	Age60+	α=1.0; HOS	0.678455	0.625865	0.505293	0.55981	0.505716	0.575028
		ISL	1	Age60+	α=1.0; HOS	0.886396	0.577589	0.588259	0.485926	0.597557	0.627145
		ISR	5	Age60+	α=1.0; HOS	0.671641	0.558051	0.501782	0.455705	0.507028	0.538841
		ITA	1	Age60+	α=1.0; HOS	0.725399	0.555252	0.5559	0.476704	0.506428	0.563937
		JAM	7	Age60+	α=1.0; HOS	0.947842	0.589167	0.650453	0.545292	0.603729	0.667297
		JOR	5	Age60+	α=1.0; HOS	0.623607	0.597534	0.384093	0.435043	0.473969	0.50285
		JPN	3	Age60+	α=1.0; HOS	0.733647	0.528817	0.523241	0.459685	0.547916	0.558661
		KAZ	5	Age60+	α=1.0; HOS	0.766551	0.607219	0.548622	0.515151	0.517642	0.591037
		KEN	4	Age60+	α=1.0; HOS	0.643448	0.585168	0.372822	0.452014	0.492692	0.509229
		KGZ	5	Age60+	α=1.0; HOS	0.681996	0.598641	0.404054	0.469416	0.464306	0.523683
		KOR	3	Age60+	α=1.0; HOS	0.681016	0.542139	0.352051	0.403031	0.457985	0.487245
		KWT	5	Age60+	α=1.0; HOS	0.682697	0.52298	0.3389	0.417373	0.409009	0.474192
		LAO	6	Age60+	α=1.0; HOS	0.727358	0.545521	0.354678	0.421245	0.444704	0.498701
		LCA	7	Age60+	α=1.0; HOS	0.696171	0.537033	0.53293	0.472128	0.543232	0.556299
		LKA	6	Age60+	α=1.0; HOS	0.715746	0.538728	0.569609	0.498518	0.633482	0.591217
		LTU	1	Age60+	α=1.0; HOS	0.721759	0.554416	0.363671	0.455593	0.408034	0.500695
		LUX	1	Age60+	α=1.0; HOS	0.711092	0.541468	0.354206	0.417215	0.433993	0.491595
		LVA	1	Age60+	α=1.0; HOS	0.711272	0.565086	0.350768	0.450985	0.437816	0.503186
		MAR	5	Age60+	α=1.0; HOS	0.727875	0.54491	0.378393	0.42682	0.463766	0.508353
		MDA	1	Age60+	α=1.0; HOS	0.687488	0.578141	0.359409	0.439531	0.442269	0.501368
		MDG	4	Age60+	α=1.0; HOS	0.677131	0.587308	0.379323	0.428069	0.481891	0.510744
		MDV	6	Age60+	α=1.0; HOS	0.822992	0.564529	0.345306	0.414976	0.551789	0.539918
		MEX	7	Age60+	α=1.0; HOS	0.677996	0.527018	0.341954	0.414652	0.43277	0.478878
		MKD	1	Age60+	α=1.0; HOS	0.695578	0.562639	0.508375	0.457556	0.513705	0.547571
		MLI	4	Age60+	α=1.0; HOS	0.738474	0.587822	0.450773	0.453055	0.5276	0.551545
		MLT	1	Age60+	α=1.0; HOS	0.730487	0.551762	0.367163	0.405737	0.490119	0.509054
		MNE	1	Age60+	α=1.0; HOS	0.694563	0.544557	0.350395	0.423948	0.425774	0.487847
		MNG	5	Age60+	α=1.0; HOS	0.702864	0.597748	0.363233	0.425272	0.476024	0.513028
		MOZ	4	Age60+	α=1.0; HOS	0.698785	0.543978	0.344035	0.40855	0.456342	0.490338
		MRT	4	Age60+	α=1.0; HOS	0.711721	0.665611	0.415376	0.538851	0.535244	0.573361
		MUS	6	Age60+	α=1.0; HOS	0.683261	0.549862	0.341367	0.43186	0.423748	0.48602
		MWI	4	Age60+	α=1.0; HOS	0.691564	0.562738	0.352488	0.423832	0.475653	0.501255
		MYS	6	Age60+	α=1.0; HOS	0.672365	0.516754	0.344045	0.428909	0.453386	0.483092
		NAM	4	Age60+	α=1.0; HOS	0.700754	0.530541	0.362705	0.410701	0.450226	0.490986
		NER	4	Age60+	α=1.0; HOS	0.587765	0.446024	0.313063	0.438747	0.47046	0.451212
		NGA	4	Age60+	α=1.0; HOS	0.768301	0.51608	0.342004	0.413773	0.42859	0.493749
		NIC	7	Age60+	α=1.0; HOS	0.703222	0.554369	0.376677	0.455916	0.443932	0.506823
		NLD	1	Age60+	α=1.0; HOS	0.726258	0.562229	0.382617	0.428254	0.42137	0.504146
		NOR	1	Age60+	α=1.0; HOS	0.659424	0.526493	0.481627	0.444429	0.497054	0.521805
		NPL	6	Age60+	α=1.0; HOS	0.658594	0.617164	0.386082	0.418734	0.519674	0.52005
		NZL	2	Age60+	α=1.0; HOS	0.705025	0.53032	0.456952	0.418618	0.496267	0.521436
		PAK	6	Age60+	α=1.0; HOS	0.688894	0.615544	0.411115	0.52637	0.483213	0.545027
		PAN	7	Age60+	α=1.0; HOS	0.703845	0.562444	0.388746	0.467683	0.480123	0.520568
		PER	7	Age60+	α=1.0; HOS	0.667942	0.507929	0.470912	0.450077	0.48551	0.516474
		PHL	6	Age60+	α=1.0; HOS	0.731063	0.570285	0.415396	0.41893	0.535989	0.534333
		POL	1	Age60+	α=1.0; HOS	0.754625	0.526032	0.420257	0.439784	0.445504	0.51724
		PRT	1	Age60+	α=1.0; HOS	1.00357	0.566022	0.628843	0.517937	0.656609	0.674597
		PRY	7	Age60+	α=1.0; HOS	0.940432	0.583289	0.63646	0.552746	0.621488	0.666883
		PSE	5	Age60+	α=1.0; HOS	0.960382	0.726291	0.437932	0.435814	0.461482	0.60438
		ROU	1	Age60+	α=1.0; HOS	0.732022	0.55569	0.371876	0.435027	0.449058	0.508735
		RUS	1	Age60+	α=1.0; HOS	0.730815	0.525628	0.520526	0.465912	0.476754	0.543927
		RWA	4	Age60+	α=1.0; HOS	0.88333	0.625096	0.503737	0.445368	0.684234	0.628353
		SAU	5	Age60+	α=1.0; HOS	0.647754	0.539255	0.349811	0.429894	0.431443	0.479631
		SDN	4	Age60+	α=1.0; HOS	0.62144	0.556564	0.369792	0.416969	0.497449	0.492443
		SEN	4	Age60+	α=1.0; HOS	0.710252	0.568126	0.37974	0.42711	0.453935	0.507832
		SLV	7	Age60+	α=1.0; HOS	0.741956	0.576498	0.392368	0.482076	0.492215	0.537023
		SRB	1	Age60+	α=1.0; HOS	0.688991	0.577778	0.550922	0.492447	0.48611	0.55925
		SUR	7	Age60+	α=1.0; HOS	0.991545	0.627189	0.769594	0.700388	0.643423	0.746428
		SVK	1	Age60+	α=1.0; HOS	0.671829	0.529321	0.383541	0.413382	0.447369	0.489088
		SVN	1	Age60+	α=1.0; HOS	0.73696	0.536084	0.448303	0.437096	0.478058	0.5273
		SWE	1	Age60+	α=1.0; HOS	0.761096	0.538819	0.591737	0.487978	0.495653	0.575056
		SWZ	4	Age60+	α=1.0; HOS	0.833597	0.618335	0.417076	0.510526	0.534535	0.582814
		THA	6	Age60+	α=1.0; HOS	0.647984	0.528654	0.481237	0.439586	0.506215	0.520735
		TJK	5	Age60+	α=1.0; HOS	0.753231	0.617	0.66002	0.573254	0.534693	0.62764
		TTO	7	Age60+	α=1.0; HOS	0.650631	0.501697	0.443726	0.421782	0.48263	0.500093
		TUN	5	Age60+	α=1.0; HOS	0.662177	0.513154	0.328354	0.409598	0.42361	0.467378
		TUR	5	Age60+	α=1.0; HOS	0.697281	0.611387	0.410154	0.44611	0.48331	0.529649
		TZA	4	Age60+	α=1.0; HOS	0.670821	0.562747	0.3447	0.429899	0.464673	0.494568
		UKR	1	Age60+	α=1.0; HOS	0.700687	0.534115	0.412384	0.421926	0.459339	0.50569
		URY	7	Age60+	α=1.0; HOS	0.711769	0.568914	0.432741	0.451265	0.464247	0.525787
		USA	2	Age60+	α=1.0; HOS	0.986941	0.58512	0.611232	0.528255	0.703737	0.683057
		UZB	5	Age60+	α=1.0; HOS	0.68018	0.602709	0.349973	0.436623	0.459419	0.505781
		VCT	7	Age60+	α=1.0; HOS	0.914946	0.603572	0.555212	0.533361	0.627559	0.64693
		ZAF	4	Age60+	α=1.0; HOS	0.757815	0.564527	0.417138	0.457843	0.476153	0.534695
		ZWE	4	Age60+	α=1.0; HOS	0.668478	0.551597	0.355307	0.450227	0.432456	0.491613
		AGO	4	Age6-10	α=1.0; HOS	0.764693	0.547973	0.394856	0.434555	0.514775	0.531371
		ALB	1	Age6-10	α=1.0; HOS	0.75218	0.606066	0.593501	0.546813	0.599765	0.619665
		ARE	5	Age6-10	α=1.0; HOS	0.67677	0.620256	0.525257	0.475259	0.609695	0.581448
		ARG	7	Age6-10	α=1.0; HOS	0.787969	0.590651	0.478761	0.573754	0.515942	0.589415
		ARM	1	Age6-10	α=1.0; HOS	0.673833	0.58114	0.377097	0.486741	0.455238	0.51481
		ATG	7	Age6-10	α=1.0; HOS	0.823595	0.605046	0.521206	0.533312	0.563768	0.609385
		AUS	2	Age6-10	α=1.0; HOS	0.691231	0.608051	0.529867	0.473488	0.536124	0.567752
		AUT	1	Age6-10	α=1.0; HOS	0.648172	0.57482	0.43816	0.455996	0.482642	0.519958
		AZE	1	Age6-10	α=1.0; HOS	0.685074	0.561935	0.373747	0.484756	0.436877	0.508478
		BEL	1	Age6-10	α=1.0; HOS	0.628274	0.561669	0.424973	0.446987	0.487151	0.509811
		BEN	4	Age6-10	α=1.0; HOS	0.796574	0.551734	0.397085	0.441616	0.516251	0.540652
		BFA	4	Age6-10	α=1.0; HOS	0.666548	0.626047	0.437943	0.494167	0.520395	0.54902
		BGD	6	Age6-10	α=1.0; HOS	0.673583	0.562258	0.389951	0.454572	0.477336	0.51154
		BGR	1	Age6-10	α=1.0; HOS	0.661554	0.555789	0.386255	0.448208	0.461876	0.502736
		BHS	7	Age6-10	α=1.0; HOS	0.695433	0.564866	0.432892	0.504391	0.519706	0.543458
		BIH	1	Age6-10	α=1.0; HOS	0.659184	0.581969	0.425926	0.439938	0.492822	0.519968
		BLR	1	Age6-10	α=1.0; HOS	0.706367	0.564354	0.4009	0.49955	0.468226	0.527879
		BLZ	7	Age6-10	α=1.0; HOS	0.678224	0.552055	0.405751	0.467111	0.463228	0.513274
		BOL	7	Age6-10	α=1.0; HOS	0.710145	0.604944	0.444709	0.499475	0.545182	0.560891
		BRA	7	Age6-10	α=1.0; HOS	0.709367	0.563037	0.402162	0.459911	0.476364	0.522168
		BRB	7	Age6-10	α=1.0; HOS	0.65518	0.556392	0.392459	0.432114	0.508924	0.509014
		BRN	6	Age6-10	α=1.0; HOS	0.79608	0.537318	0.419341	0.459928	0.492814	0.541096
		BWA	4	Age6-10	α=1.0; HOS	0.707053	0.604481	0.426878	0.482556	0.528363	0.549866
		CAF	4	Age6-10	α=1.0; HOS	0.809671	0.569629	0.441857	0.543103	0.495529	0.571958
		CAN	2	Age6-10	α=1.0; HOS	0.774935	0.580203	0.5778	0.508535	0.587281	0.605751
		CHE	1	Age6-10	α=1.0; HOS	0.682931	0.591535	0.447939	0.483078	0.510632	0.543223
		CHL	7	Age6-10	α=1.0; HOS	0.906067	0.583726	0.58516	0.543461	0.651037	0.65389
		CHN	3	Age6-10	α=1.0; HOS	0.723322	0.596631	0.586208	0.486399	0.611554	0.600823
		CIV	4	Age6-10	α=1.0; HOS	0.790525	0.604097	0.451485	0.470777	0.587953	0.580967
		CMR	4	Age6-10	α=1.0; HOS	0.692792	0.553058	0.377152	0.432469	0.47771	0.506636
		COG	4	Age6-10	α=1.0; HOS	0.771096	0.558428	0.378596	0.445419	0.491442	0.528996
		COL	7	Age6-10	α=1.0; HOS	0.696699	0.579672	0.411097	0.465078	0.507456	0.532001
		CPV	4	Age6-10	α=1.0; HOS	0.650886	0.575711	0.404617	0.448478	0.517	0.519338
		CRI	7	Age6-10	α=1.0; HOS	0.802996	0.625429	0.508204	0.553793	0.629585	0.624001
		CYP	1	Age6-10	α=1.0; HOS	0.676497	0.567414	0.451809	0.473326	0.494228	0.532655
		CZE	1	Age6-10	α=1.0; HOS	0.703514	0.577802	0.590984	0.501457	0.565704	0.587892
		DEU	1	Age6-10	α=1.0; HOS	0.69739	0.573155	0.449841	0.448196	0.522117	0.53814
		DJI	4	Age6-10	α=1.0; HOS	0.631163	0.623358	0.496383	0.533054	0.521284	0.561048
		DMA	7	Age6-10	α=1.0; HOS	0.778297	0.564793	0.617435	0.54478	0.537561	0.608573
		DNK	1	Age6-10	α=1.0; HOS	0.930671	0.553147	0.654414	0.627841	0.608818	0.674978
		DOM	7	Age6-10	α=1.0; HOS	0.712094	0.564521	0.62657	0.55927	0.538198	0.60013
		DZA	5	Age6-10	α=1.0; HOS	0.671122	0.611561	0.469343	0.515163	0.585579	0.570554
		ECU	7	Age6-10	α=1.0; HOS	0.707098	0.571755	0.434589	0.505944	0.466798	0.537237
		EGY	5	Age6-10	α=1.0; HOS	0.650935	0.547425	0.385825	0.427834	0.464405	0.495285
		ESP	1	Age6-10	α=1.0; HOS	0.671365	0.550772	0.439249	0.434914	0.499264	0.519113
		EST	1	Age6-10	α=1.0; HOS	0.664565	0.565713	0.400164	0.462945	0.452707	0.509219
		ETH	4	Age6-10	α=1.0; HOS	0.716584	0.633385	0.410815	0.517472	0.504024	0.556456
		FIN	1	Age6-10	α=1.0; HOS	0.86112	0.568325	0.524953	0.516227	0.587569	0.611639
		FJI	2	Age6-10	α=1.0; HOS	0.675252	0.549402	0.378643	0.420553	0.471402	0.49905
		FRA	1	Age6-10	α=1.0; HOS	0.730984	0.561437	0.448083	0.460466	0.520632	0.544321
		GBR	1	Age6-10	α=1.0; HOS	0.682313	0.570667	0.392223	0.463174	0.469312	0.515538
		GEO	1	Age6-10	α=1.0; HOS	0.689552	0.555786	0.418558	0.476873	0.454458	0.519045
		GHA	4	Age6-10	α=1.0; HOS	0.73378	0.548905	0.432442	0.433779	0.548618	0.539505
		GIN	4	Age6-10	α=1.0; HOS	0.696322	0.546893	0.375167	0.44464	0.460621	0.504729
		GMB	4	Age6-10	α=1.0; HOS	0.68476	0.552399	0.384181	0.468417	0.453372	0.508626
		GNB	4	Age6-10	α=1.0; HOS	0.758026	0.668575	0.528798	0.550167	0.588023	0.618718
		GRC	1	Age6-10	α=1.0; HOS	0.650581	0.554731	0.390608	0.438368	0.450154	0.496888
		GRD	7	Age6-10	α=1.0; HOS	0.802499	0.617943	0.674978	0.591966	0.68923	0.675323
		GUY	7	Age6-10	α=1.0; HOS	0.663544	0.55577	0.376401	0.438494	0.462384	0.499319
		HND	7	Age6-10	α=1.0; HOS	0.664986	0.560291	0.415943	0.487974	0.456133	0.517066
		HRV	1	Age6-10	α=1.0; HOS	0.717522	0.580548	0.417986	0.466154	0.516155	0.539673
		HTI	7	Age6-10	α=1.0; HOS	0.71898	0.58885	0.639402	0.537899	0.609781	0.618982
		HUN	1	Age6-10	α=1.0; HOS	0.698681	0.611665	0.639384	0.534231	0.592781	0.615349
		IDN	6	Age6-10	α=1.0; HOS	0.689419	0.559199	0.397077	0.442481	0.521786	0.521992
		IND	6	Age6-10	α=1.0; HOS	0.869649	0.607071	0.391865	0.450903	0.663684	0.596634
		IRL	1	Age6-10	α=1.0; HOS	1.01988	0.55364	0.583798	0.642537	0.543374	0.668645
		IRN	6	Age6-10	α=1.0; HOS	0.661344	0.573018	0.396237	0.452832	0.460335	0.508753
		IRQ	5	Age6-10	α=1.0; HOS	0.661102	0.611848	0.491662	0.540152	0.580357	0.577024
		ISL	1	Age6-10	α=1.0; HOS	0.706324	0.572528	0.463486	0.446761	0.584799	0.55478
		ISR	5	Age6-10	α=1.0; HOS	0.68217	0.55959	0.452833	0.456487	0.523531	0.534922
		ITA	1	Age6-10	α=1.0; HOS	0.721109	0.573589	0.425688	0.481283	0.516075	0.543549
		JAM	7	Age6-10	α=1.0; HOS	0.82205	0.596642	0.600616	0.50991	0.619301	0.629704
		JOR	5	Age6-10	α=1.0; HOS	0.615771	0.588979	0.421111	0.435252	0.507696	0.513762
		JPN	3	Age6-10	α=1.0; HOS	0.72624	0.553004	0.557893	0.493518	0.552835	0.576698
		KAZ	5	Age6-10	α=1.0; HOS	0.673723	0.596507	0.437859	0.519425	0.507658	0.547034
		KEN	4	Age6-10	α=1.0; HOS	0.652969	0.605539	0.414926	0.474276	0.520207	0.533583
		KGZ	5	Age6-10	α=1.0; HOS	0.669391	0.583703	0.432543	0.497279	0.47944	0.532471
		KOR	3	Age6-10	α=1.0; HOS	0.67279	0.550728	0.377385	0.415909	0.475441	0.498451
		KWT	5	Age6-10	α=1.0; HOS	0.672986	0.544854	0.366974	0.428233	0.445582	0.491726
		LAO	6	Age6-10	α=1.0; HOS	0.72212	0.562242	0.382605	0.462364	0.471103	0.520087
		LCA	7	Age6-10	α=1.0; HOS	0.698883	0.587543	0.439517	0.507804	0.502723	0.547294
		LKA	6	Age6-10	α=1.0; HOS	0.708129	0.608122	0.43531	0.478223	0.576882	0.561333
		LTU	1	Age6-10	α=1.0; HOS	0.924112	0.576672	0.410422	0.488303	0.56063	0.592028
		LUX	1	Age6-10	α=1.0; HOS	0.666436	0.551924	0.396609	0.451248	0.437246	0.500692
		LVA	1	Age6-10	α=1.0; HOS	0.687533	0.567702	0.393087	0.489505	0.47334	0.522234
		MAR	5	Age6-10	α=1.0; HOS	0.695949	0.581938	0.412237	0.445843	0.530529	0.533299
		MDA	1	Age6-10	α=1.0; HOS	0.723405	0.571824	0.371487	0.484755	0.462	0.522694
		MDG	4	Age6-10	α=1.0; HOS	0.719888	0.592733	0.396375	0.462526	0.507551	0.535815
		MDV	6	Age6-10	α=1.0; HOS	0.761355	0.555566	0.413013	0.476478	0.562482	0.553779
		MEX	7	Age6-10	α=1.0; HOS	0.661836	0.535287	0.378663	0.432743	0.463728	0.494451
		MKD	1	Age6-10	α=1.0; HOS	0.681527	0.570832	0.403056	0.465992	0.505484	0.525378
		MLI	4	Age6-10	α=1.0; HOS	0.86792	0.631003	0.447687	0.551772	0.539777	0.607632
		MLT	1	Age6-10	α=1.0; HOS	0.715957	0.587617	0.43041	0.463578	0.549387	0.54939
		MNE	1	Age6-10	α=1.0; HOS	0.688624	0.556453	0.391148	0.453086	0.44619	0.5071
		MNG	5	Age6-10	α=1.0; HOS	0.682921	0.583269	0.39787	0.462387	0.474763	0.520242
		MOZ	4	Age6-10	α=1.0; HOS	0.743593	0.537974	0.362802	0.424649	0.46073	0.50595
		MRT	4	Age6-10	α=1.0; HOS	0.721882	0.653278	0.475821	0.558254	0.546071	0.591061
		MUS	6	Age6-10	α=1.0; HOS	0.666235	0.535663	0.381108	0.434344	0.455142	0.494499
		MWI	4	Age6-10	α=1.0; HOS	0.665455	0.580484	0.409226	0.44863	0.524114	0.525582
		MYS	6	Age6-10	α=1.0; HOS	0.669844	0.582343	0.389153	0.4507	0.52174	0.522756
		NAM	4	Age6-10	α=1.0; HOS	0.811431	0.565098	0.416366	0.449725	0.578382	0.5642
		NER	4	Age6-10	α=1.0; HOS	0.621353	0.522185	0.383277	0.43638	0.488652	0.490369
		NGA	4	Age6-10	α=1.0; HOS	0.744783	0.535688	0.378684	0.438454	0.465416	0.512605
		NIC	7	Age6-10	α=1.0; HOS	0.697582	0.585979	0.418502	0.481492	0.486156	0.533942
		NLD	1	Age6-10	α=1.0; HOS	0.997373	0.567426	0.452392	0.538551	0.565415	0.624231
		NOR	1	Age6-10	α=1.0; HOS	0.674347	0.57983	0.584942	0.51602	0.539981	0.579024
		NPL	6	Age6-10	α=1.0; HOS	0.823609	0.654155	0.446214	0.549677	0.601948	0.61512
		NZL	2	Age6-10	α=1.0; HOS	0.680937	0.568342	0.421925	0.463354	0.477996	0.522511
		PAK	6	Age6-10	α=1.0; HOS	0.679785	0.628505	0.461477	0.555807	0.550539	0.575223
		PAN	7	Age6-10	α=1.0; HOS	0.651268	0.567956	0.412738	0.446522	0.491723	0.514041
		PER	7	Age6-10	α=1.0; HOS	0.720629	0.548693	0.538057	0.496727	0.535515	0.567924
		PHL	6	Age6-10	α=1.0; HOS	0.831459	0.576742	0.542869	0.459807	0.649785	0.612132
		POL	1	Age6-10	α=1.0; HOS	0.723985	0.575353	0.411182	0.497011	0.467117	0.53493
		PRT	1	Age6-10	α=1.0; HOS	0.791046	0.586401	0.519937	0.499073	0.623673	0.604026
		PRY	7	Age6-10	α=1.0; HOS	0.749174	0.596794	0.452302	0.503092	0.523631	0.564999
		PSE	5	Age6-10	α=1.0; HOS	0.894901	0.614844	0.475351	0.439326	0.56706	0.598296
		ROU	1	Age6-10	α=1.0; HOS	0.70005	0.587518	0.416869	0.484199	0.47643	0.533013
		RUS	1	Age6-10	α=1.0; HOS	0.67511	0.572544	0.40012	0.464235	0.486702	0.519742
		RWA	4	Age6-10	α=1.0; HOS	0.893352	0.607837	0.495893	0.491599	0.68799	0.635334
		SAU	5	Age6-10	α=1.0; HOS	0.630795	0.550338	0.442676	0.450162	0.482444	0.511283
		SDN	4	Age6-10	α=1.0; HOS	0.663975	0.57584	0.396722	0.466417	0.462967	0.513184
		SEN	4	Age6-10	α=1.0; HOS	0.698964	0.575909	0.411327	0.480113	0.520899	0.537442
		SLV	7	Age6-10	α=1.0; HOS	0.792047	0.598198	0.449926	0.508429	0.534154	0.576551
		SRB	1	Age6-10	α=1.0; HOS	0.647043	0.596591	0.446255	0.493174	0.494339	0.53548
		SUR	7	Age6-10	α=1.0; HOS	0.68783	0.597907	0.459213	0.489822	0.504672	0.547889
		SVK	1	Age6-10	α=1.0; HOS	0.675353	0.546292	0.375357	0.438623	0.453239	0.497773
		SVN	1	Age6-10	α=1.0; HOS	0.673053	0.604621	0.428738	0.46669	0.535232	0.541667
		SWE	1	Age6-10	α=1.0; HOS	0.815166	0.605692	0.69472	0.569288	0.681992	0.673372
		SWZ	4	Age6-10	α=1.0; HOS	0.752413	0.60779	0.452	0.488375	0.566237	0.573363
		THA	6	Age6-10	α=1.0; HOS	0.673353	0.57218	0.570678	0.497062	0.575979	0.57785
		TJK	5	Age6-10	α=1.0; HOS	0.660987	0.622664	0.428033	0.509794	0.524652	0.549226
		TTO	7	Age6-10	α=1.0; HOS	0.670419	0.554971	0.518686	0.463654	0.544717	0.550489
		TUN	5	Age6-10	α=1.0; HOS	0.656497	0.540298	0.36851	0.420378	0.459329	0.489003
		TUR	5	Age6-10	α=1.0; HOS	0.687239	0.590218	0.425458	0.473245	0.526057	0.540443
		TZA	4	Age6-10	α=1.0; HOS	0.66761	0.570865	0.389988	0.442098	0.486377	0.511388
		UKR	1	Age6-10	α=1.0; HOS	0.693513	0.546275	0.38187	0.448479	0.451676	0.504363
		URY	7	Age6-10	α=1.0; HOS	0.872434	0.583481	0.489197	0.512693	0.594197	0.6104
		USA	2	Age6-10	α=1.0; HOS	0.867888	0.604321	0.494627	0.546479	0.655446	0.633752
		UZB	5	Age6-10	α=1.0; HOS	0.685168	0.589714	0.382942	0.48121	0.462039	0.520215
		VCT	7	Age6-10	α=1.0; HOS	1.06768	0.595283	0.748339	0.656413	0.707978	0.755138
		ZAF	4	Age6-10	α=1.0; HOS	0.725556	0.55583	0.438795	0.425712	0.545462	0.538271
		ZWE	4	Age6-10	α=1.0; HOS	0.697949	0.571034	0.386187	0.4703	0.460045	0.517103
		AGO	4	MEAN	α=1.0; HOS	0.775379	0.552407	0.396692	0.442468	0.509657	0.535321
		ALB	1	MEAN	α=1.0; HOS	0.823858	0.590534	0.592897	0.514737	0.561705	0.616746
		ARE	5	MEAN	α=1.0; HOS	0.782208	0.603753	0.370251	0.434827	0.506629	0.539534
		ARG	7	MEAN	α=1.0; HOS	0.744032	0.557452	0.415304	0.485746	0.45885	0.532277
		ARM	1	MEAN	α=1.0; HOS	0.709451	0.583221	0.339497	0.469843	0.458188	0.51204
		ATG	7	MEAN	α=1.0; HOS	0.861359	0.54386	0.601979	0.517685	0.520529	0.609082
		AUS	2	MEAN	α=1.0; HOS	0.808112	0.553333	0.516474	0.463038	0.547794	0.57775
		AUT	1	MEAN	α=1.0; HOS	0.70548	0.549414	0.411739	0.424365	0.462408	0.510681
		AZE	1	MEAN	α=1.0; HOS	0.716423	0.581866	0.339763	0.470802	0.427347	0.50724
		BEL	1	MEAN	α=1.0; HOS	0.715804	0.538706	0.363308	0.419405	0.440922	0.495629
		BEN	4	MEAN	α=1.0; HOS	0.774987	0.557775	0.374628	0.429234	0.500108	0.527346
		BFA	4	MEAN	α=1.0; HOS	0.684199	0.589533	0.389208	0.466928	0.495045	0.524983
		BGD	6	MEAN	α=1.0; HOS	0.685678	0.554828	0.348833	0.439189	0.452388	0.496183
		BGR	1	MEAN	α=1.0; HOS	0.674858	0.532744	0.411019	0.431697	0.450985	0.500261
		BHS	7	MEAN	α=1.0; HOS	0.713604	0.555345	0.357765	0.441403	0.444672	0.502558
		BIH	1	MEAN	α=1.0; HOS	0.709304	0.606086	0.358613	0.458267	0.422984	0.511051
		BLR	1	MEAN	α=1.0; HOS	0.732105	0.55977	0.372129	0.45771	0.44994	0.514331
		BLZ	7	MEAN	α=1.0; HOS	0.682252	0.544047	0.390661	0.449245	0.429179	0.499077
		BOL	7	MEAN	α=1.0; HOS	0.782094	0.566418	0.399848	0.470498	0.486849	0.541141
		BRA	7	MEAN	α=1.0; HOS	0.729124	0.538811	0.384948	0.434163	0.447488	0.506907
		BRB	7	MEAN	α=1.0; HOS	0.689455	0.532694	0.449079	0.427701	0.46599	0.512984
		BRN	6	MEAN	α=1.0; HOS	0.860778	0.548121	0.395879	0.434606	0.482639	0.544404
		BWA	4	MEAN	α=1.0; HOS	0.712102	0.579045	0.382413	0.443942	0.483732	0.520247
		CAF	4	MEAN	α=1.0; HOS	0.813536	0.557002	0.419988	0.540022	0.47987	0.562084
		CAN	2	MEAN	α=1.0; HOS	0.750281	0.547828	0.510845	0.46239	0.526132	0.559495
		CHE	1	MEAN	α=1.0; HOS	0.742578	0.553553	0.552464	0.478509	0.500017	0.565424
		CHL	7	MEAN	α=1.0; HOS	0.899274	0.558186	0.631483	0.566029	0.637157	0.658426
		CHN	3	MEAN	α=1.0; HOS	0.709039	0.569824	0.549317	0.50158	0.533395	0.572631
		CIV	4	MEAN	α=1.0; HOS	0.817335	0.587109	0.414161	0.439732	0.569026	0.565472
		CMR	4	MEAN	α=1.0; HOS	0.713005	0.556867	0.356575	0.425224	0.464073	0.503149
		COG	4	MEAN	α=1.0; HOS	0.774281	0.536904	0.359577	0.429894	0.464397	0.513011
		COL	7	MEAN	α=1.0; HOS	0.727547	0.532328	0.427455	0.450078	0.456505	0.518783
		CPV	4	MEAN	α=1.0; HOS	0.71419	0.542284	0.372034	0.428923	0.450986	0.501683
		CRI	7	MEAN	α=1.0; HOS	0.909882	0.58058	0.569689	0.542593	0.621945	0.644938
		CYP	1	MEAN	α=1.0; HOS	0.704955	0.548103	0.409472	0.422404	0.448373	0.506661
		CZE	1	MEAN	α=1.0; HOS	0.776961	0.542516	0.555465	0.480474	0.532766	0.577636
		DEU	1	MEAN	α=1.0; HOS	0.724792	0.546739	0.447946	0.442664	0.469191	0.526266
		DJI	4	MEAN	α=1.0; HOS	0.69574	0.621176	0.412367	0.487728	0.500512	0.543504
		DMA	7	MEAN	α=1.0; HOS	0.775812	0.528337	0.497897	0.469481	0.467072	0.54772
		DNK	1	MEAN	α=1.0; HOS	0.691743	0.553467	0.415609	0.426157	0.456356	0.508666
		DOM	7	MEAN	α=1.0; HOS	0.721852	0.538067	0.449277	0.486943	0.444117	0.528051
		DZA	5	MEAN	α=1.0; HOS	0.698131	0.616069	0.370602	0.443237	0.508563	0.52732
		ECU	7	MEAN	α=1.0; HOS	0.741001	0.550369	0.443184	0.468976	0.491641	0.539034
		EGY	5	MEAN	α=1.0; HOS	0.654401	0.538639	0.372375	0.414948	0.448954	0.485863
		ESP	1	MEAN	α=1.0; HOS	0.720107	0.54908	0.502411	0.443123	0.499953	0.542935
		EST	1	MEAN	α=1.0; HOS	0.704451	0.533074	0.371546	0.420512	0.434816	0.49288
		ETH	4	MEAN	α=1.0; HOS	0.696707	0.598042	0.372652	0.472091	0.479099	0.523718
		FIN	1	MEAN	α=1.0; HOS	0.764494	0.550418	0.555743	0.503448	0.540131	0.582847
		FJI	2	MEAN	α=1.0; HOS	0.687049	0.535115	0.394666	0.412276	0.464776	0.498777
		FRA	1	MEAN	α=1.0; HOS	0.699444	0.54444	0.468686	0.437278	0.500573	0.530084
		GBR	1	MEAN	α=1.0; HOS	0.706853	0.544621	0.398172	0.429085	0.447654	0.505277
		GEO	1	MEAN	α=1.0; HOS	0.786238	0.56827	0.334231	0.465392	0.447147	0.520256
		GHA	4	MEAN	α=1.0; HOS	0.788078	0.526932	0.351123	0.417987	0.476098	0.512044
		GIN	4	MEAN	α=1.0; HOS	0.703585	0.543422	0.354417	0.436186	0.440083	0.495539
		GMB	4	MEAN	α=1.0; HOS	0.761397	0.563202	0.344279	0.464418	0.474208	0.521501
		GNB	4	MEAN	α=1.0; HOS	0.826025	0.611013	0.423856	0.462514	0.573073	0.579296
		GRC	1	MEAN	α=1.0; HOS	0.68061	0.533522	0.363741	0.406691	0.444733	0.485859
		GRD	7	MEAN	α=1.0; HOS	0.905621	0.548478	0.609229	0.556894	0.671763	0.658397
		GUY	7	MEAN	α=1.0; HOS	0.683729	0.516238	0.397505	0.426245	0.426622	0.490068
		HND	7	MEAN	α=1.0; HOS	0.68678	0.541311	0.406503	0.458685	0.428506	0.504357
		HRV	1	MEAN	α=1.0; HOS	0.716465	0.546357	0.450248	0.445229	0.469801	0.52562
		HTI	7	MEAN	α=1.0; HOS	0.713763	0.551162	0.387672	0.452007	0.482575	0.517436
		HUN	1	MEAN	α=1.0; HOS	0.711066	0.539336	0.431824	0.442026	0.473072	0.519465
		IDN	6	MEAN	α=1.0; HOS	0.690446	0.554417	0.437771	0.434182	0.509252	0.525214
		IND	6	MEAN	α=1.0; HOS	0.771264	0.573682	0.358053	0.414085	0.511059	0.525629
		IRL	1	MEAN	α=1.0; HOS	0.726589	0.550028	0.537664	0.475627	0.488798	0.555741
		IRN	6	MEAN	α=1.0; HOS	0.696655	0.568194	0.368717	0.42686	0.441255	0.500336
		IRQ	5	MEAN	α=1.0; HOS	0.757281	0.622358	0.441917	0.551997	0.538445	0.5824
		ISL	1	MEAN	α=1.0; HOS	0.796219	0.55604	0.569946	0.494979	0.573107	0.598058
		ISR	5	MEAN	α=1.0; HOS	0.686241	0.552922	0.47849	0.454198	0.480515	0.530473
		ITA	1	MEAN	α=1.0; HOS	0.730119	0.543488	0.512408	0.472196	0.470445	0.545731
		JAM	7	MEAN	α=1.0; HOS	0.84793	0.549949	0.528094	0.497154	0.55633	0.595892
		JOR	5	MEAN	α=1.0; HOS	0.66416	0.585639	0.379311	0.441086	0.471963	0.508432
		JPN	3	MEAN	α=1.0; HOS	0.727279	0.520596	0.475589	0.43493	0.512399	0.534159
		KAZ	5	MEAN	α=1.0; HOS	0.739095	0.580022	0.521472	0.509142	0.504522	0.570851
		KEN	4	MEAN	α=1.0; HOS	0.691796	0.578032	0.380124	0.462833	0.471826	0.516922
		KGZ	5	MEAN	α=1.0; HOS	0.696247	0.565236	0.393754	0.447806	0.446137	0.509836
		KOR	3	MEAN	α=1.0; HOS	0.700635	0.539346	0.349338	0.410526	0.440227	0.488014
		KWT	5	MEAN	α=1.0; HOS	0.698624	0.534739	0.340375	0.42612	0.412599	0.482491
		LAO	6	MEAN	α=1.0; HOS	0.745847	0.541508	0.356676	0.432497	0.4449	0.504286
		LCA	7	MEAN	α=1.0; HOS	0.734455	0.511195	0.443676	0.447317	0.47849	0.523027
		LKA	6	MEAN	α=1.0; HOS	0.788285	0.557145	0.454881	0.471041	0.548401	0.563951
		LTU	1	MEAN	α=1.0; HOS	0.751108	0.554885	0.360966	0.441395	0.431395	0.50795
		LUX	1	MEAN	α=1.0; HOS	0.726764	0.542144	0.358555	0.432525	0.423048	0.496607
		LVA	1	MEAN	α=1.0; HOS	0.727073	0.564268	0.348479	0.458835	0.445188	0.508769
		MAR	5	MEAN	α=1.0; HOS	0.737611	0.555833	0.37523	0.428538	0.45183	0.509808
		MDA	1	MEAN	α=1.0; HOS	0.710585	0.565603	0.350821	0.452479	0.433489	0.502595
		MDG	4	MEAN	α=1.0; HOS	0.707324	0.568348	0.405308	0.435774	0.517107	0.526772
		MDV	6	MEAN	α=1.0; HOS	0.82643	0.563951	0.358395	0.454298	0.511499	0.542915
		MEX	7	MEAN	α=1.0; HOS	0.675455	0.52575	0.357634	0.41839	0.435138	0.482473
		MKD	1	MEAN	α=1.0; HOS	0.712263	0.565262	0.40259	0.438669	0.477394	0.519236
		MLI	4	MEAN	α=1.0; HOS	0.73252	0.595541	0.395812	0.46572	0.497106	0.53734
		MLT	1	MEAN	α=1.0; HOS	0.737491	0.557274	0.387417	0.423669	0.473772	0.515924
		MNE	1	MEAN	α=1.0; HOS	0.714403	0.54586	0.362606	0.435577	0.418159	0.495321
		MNG	5	MEAN	α=1.0; HOS	0.723374	0.588147	0.362117	0.451447	0.440685	0.513154
		MOZ	4	MEAN	α=1.0; HOS	0.746644	0.535518	0.347082	0.422123	0.441221	0.498517
		MRT	4	MEAN	α=1.0; HOS	0.70514	0.617286	0.420966	0.520389	0.512476	0.555251
		MUS	6	MEAN	α=1.0; HOS	0.689735	0.540825	0.348431	0.42657	0.42362	0.485836
		MWI	4	MEAN	α=1.0; HOS	0.699368	0.574037	0.387046	0.444722	0.501089	0.521252
		MYS	6	MEAN	α=1.0; HOS	0.705681	0.549519	0.362751	0.453063	0.449953	0.504193
		NAM	4	MEAN	α=1.0; HOS	0.773733	0.548896	0.357603	0.433257	0.460014	0.514701
		NER	4	MEAN	α=1.0; HOS	0.62473	0.528061	0.35442	0.434545	0.463375	0.481026
		NGA	4	MEAN	α=1.0; HOS	0.758377	0.531679	0.350011	0.428978	0.441444	0.502098
		NIC	7	MEAN	α=1.0; HOS	0.694802	0.562531	0.391966	0.467698	0.450569	0.513513
		NLD	1	MEAN	α=1.0; HOS	0.752308	0.548307	0.365237	0.424297	0.432546	0.504539
		NOR	1	MEAN	α=1.0; HOS	0.687301	0.542441	0.522483	0.475947	0.508519	0.547338
		NPL	6	MEAN	α=1.0; HOS	0.749477	0.638619	0.411899	0.503754	0.550732	0.570896
		NZL	2	MEAN	α=1.0; HOS	0.727216	0.551774	0.387686	0.426075	0.456956	0.509941
		PAK	6	MEAN	α=1.0; HOS	0.710524	0.623964	0.417078	0.535777	0.507812	0.559031
		PAN	7	MEAN	α=1.0; HOS	0.706105	0.532441	0.376978	0.436263	0.440229	0.498403
		PER	7	MEAN	α=1.0; HOS	0.712637	0.529378	0.417014	0.444455	0.464426	0.513582
		PHL	6	MEAN	α=1.0; HOS	0.797313	0.552843	0.514227	0.472744	0.587134	0.584852
		POL	1	MEAN	α=1.0; HOS	0.752582	0.551635	0.389641	0.443666	0.454884	0.518482
		PRT	1	MEAN	α=1.0; HOS	0.954196	0.566062	0.624321	0.521666	0.639011	0.661051
		PRY	7	MEAN	α=1.0; HOS	0.77698	0.59474	0.398677	0.462553	0.511079	0.548806
		PSE	5	MEAN	α=1.0; HOS	0.953815	0.624787	0.453298	0.447759	0.542469	0.604426
		ROU	1	MEAN	α=1.0; HOS	0.726872	0.567317	0.399816	0.446227	0.461831	0.520413
		RUS	1	MEAN	α=1.0; HOS	0.73138	0.544669	0.394788	0.444543	0.4386	0.510796
		RWA	4	MEAN	α=1.0; HOS	0.914257	0.591677	0.486143	0.502168	0.621924	0.623234
		SAU	5	MEAN	α=1.0; HOS	0.654462	0.551078	0.35365	0.436936	0.441676	0.48756
		SDN	4	MEAN	α=1.0; HOS	0.670901	0.546283	0.420863	0.435013	0.460188	0.506649
		SEN	4	MEAN	α=1.0; HOS	0.727346	0.583245	0.365035	0.452262	0.495311	0.52464
		SLV	7	MEAN	α=1.0; HOS	0.779959	0.568218	0.419664	0.474933	0.501735	0.548902
		SRB	1	MEAN	α=1.0; HOS	0.693872	0.561861	0.426498	0.463258	0.448845	0.518867
		SUR	7	MEAN	α=1.0; HOS	0.862214	0.599184	0.445164	0.499625	0.554929	0.592223
		SVK	1	MEAN	α=1.0; HOS	0.68858	0.533931	0.358644	0.422389	0.431503	0.487009
		SVN	1	MEAN	α=1.0; HOS	0.744554	0.548841	0.432102	0.443296	0.462355	0.52623
		SWE	1	MEAN	α=1.0; HOS	0.752055	0.554526	0.427458	0.467015	0.458338	0.531878
		SWZ	4	MEAN	α=1.0; HOS	0.827554	0.584114	0.425115	0.462879	0.569	0.573732
		THA	6	MEAN	α=1.0; HOS	0.682052	0.538536	0.438455	0.428778	0.480721	0.513708
		TJK	5	MEAN	α=1.0; HOS	0.712906	0.640757	0.40887	0.503059	0.490964	0.551311
		TTO	7	MEAN	α=1.0; HOS	0.672044	0.523483	0.456671	0.430821	0.481936	0.512991
		TUN	5	MEAN	α=1.0; HOS	0.678734	0.525205	0.336906	0.419791	0.41499	0.475125
		TUR	5	MEAN	α=1.0; HOS	0.693872	0.603781	0.394637	0.44862	0.484938	0.525169
		TZA	4	MEAN	α=1.0; HOS	0.69156	0.567897	0.362649	0.443546	0.473368	0.507804
		UKR	1	MEAN	α=1.0; HOS	0.71281	0.545536	0.407515	0.426858	0.462464	0.511037
		URY	7	MEAN	α=1.0; HOS	0.760222	0.560004	0.42556	0.458601	0.477949	0.536467
		USA	2	MEAN	α=1.0; HOS	0.963254	0.562878	0.522049	0.495711	0.652018	0.639182
		UZB	5	MEAN	α=1.0; HOS	0.709559	0.570407	0.374169	0.455171	0.427329	0.507327
		VCT	7	MEAN	α=1.0; HOS	1.03898	0.552843	0.665382	0.563679	0.661524	0.696481
		ZAF	4	MEAN	α=1.0; HOS	0.742731	0.57574	0.41404	0.441684	0.502933	0.535426
		ZWE	4	MEAN	α=1.0; HOS	0.694917	0.575395	0.363641	0.460858	0.45855	0.510672
		AGO	4	Age0-5	α=0.0; JFS	1.00984	0.749704	0.568085	0.651709	0.80536	0.756939
		ALB	1	Age0-5	α=0.0; JFS	0.772334	0.621936	0.604161	0.569384	0.704938	0.654551
		ARE	5	Age0-5	α=0.0; JFS	0.986248	0.742111	0.647752	0.70358	0.837009	0.78334
		ARG	7	Age0-5	α=0.0; JFS	0.912271	0.663286	0.725954	0.751182	0.785914	0.767722
		ARM	1	Age0-5	α=0.0; JFS	0.790371	0.60331	0.528718	0.55914	0.717493	0.639806
		ATG	7	Age0-5	α=0.0; JFS	0.713263	0.701183	0.584455	0.648093	0.640799	0.657559
		AUS	2	Age0-5	α=0.0; JFS	0.775684	0.62697	0.489644	0.538403	0.64898	0.615936
		AUT	1	Age0-5	α=0.0; JFS	0.766345	0.65733	0.581788	0.579504	0.685958	0.654185
		AZE	1	Age0-5	α=0.0; JFS	0.783643	0.602889	0.510523	0.57534	0.697242	0.633927
		BEL	1	Age0-5	α=0.0; JFS	0.76136	0.637244	0.582812	0.559603	0.673469	0.642898
[truncated: 9,930 more rows]

## Sheet: Table S4
		Table S4 Changes in expenditure on various types of food by age group and region
		Age groups	Diet	Cereal	Root	Vegetable	Fruits	Legumes/Nuts	Eggs	Dairy	Fish	Red Meat	Poultry	Sugar	Fat&oil	Expenditure
		Age0-5	α=1.0; HOS	0.31705	0.173212	0.489235	1.38217	1.26278	-0.705508	0.636306	1.28426	-0.798134	0.107259	-0.812953	-0.754119	0.297178
		Age6-10	α=1.0; HOS	-0.258797	-0.375568	0.371171	0.821038	1.04238	-0.736314	0.451109	0.75732	-0.822623	-0.11051	-0.83695	-0.640199	-0.00857923
		Age11-19	α=1.0; HOS	-0.280442	-0.682271	0.252687	0.783146	1.12175	-0.766408	0.595608	0.834757	-0.820997	0.163381	-0.831853	-0.28162	-0.0282679
		Age20-44	α=1.0; HOS	-0.000633578	-0.788647	0.187363	0.626514	0.856134	-0.778398	1.62683	0.751745	-0.848514	0.19271	-0.782699	-0.150346	0.10371
		Age45-59	α=1.0; HOS	-0.0249598	-0.76373	0.138466	0.432101	1.02471	-0.728261	2.16125	0.558943	-0.827211	-0.0183113	-0.803207	-0.196177	0.138348
		Age60+	α=1.0; HOS	-0.20532	-0.747472	0.0866052	0.37208	0.86981	-0.711596	0.894347	0.364194	-0.828519	0.370243	-0.717791	-0.445313	-0.0163205
		MEAN	α=1.0; HOS	-0.0861321	-0.678557	0.187752	0.61805	0.962323	-0.751213	1.16081	0.654966	-0.834688	0.156196	-0.798092	-0.312275	0.0736562
		Age0-5	α=0.0; ETS	0.71388	0.559253	-0.0535749	0.582398	0.687477	-0.0446247	0.224946	-0.278466	-0.699392	-0.621761	-0.620166	-0.697779	0.100965
		Age6-10	α=0.0; ETS	-0.0246772	-0.111847	-0.405948	0.013668	0.570327	-0.152234	-0.0110636	-0.474173	-0.705621	-0.691315	-0.73863	-0.648146	-0.251751
		Age11-19	α=0.0; ETS	-0.125826	-0.205719	-0.525478	-0.0984435	0.654731	-0.0641444	-0.118423	-0.657088	-0.785521	-0.676791	-0.811229	-0.563028	-0.365861
		Age20-44	α=0.0; ETS	-0.0255077	-0.118479	-0.564153	-0.361348	0.826157	-0.0530793	0.0290785	-0.721636	-0.813257	-0.718424	-0.815381	-0.520008	-0.386954
		Age45-59	α=0.0; ETS	0.121474	-0.215462	-0.420653	-0.282105	0.8699	-0.115709	0.0706935	-0.638404	-0.767865	-0.475879	-0.766553	-0.59811	-0.316845
		Age60+	α=0.0; ETS	0.0241572	0.302562	-0.0219526	0.177019	0.342211	0.0366477	0.686253	-0.0348912	-0.524657	-0.427818	-0.234944	-0.212509	0.035688
		MEAN	α=0.0; ETS	0.0233727	-0.0497159	-0.419411	-0.145219	0.712939	-0.0586235	0.105159	-0.538683	-0.747981	-0.62099	-0.754671	-0.521551	-0.275831
		Age0-5	α=0.9	0.291907	0.299329	0.417499	1.18207	1.03674	-0.600735	0.559611	0.587111	-0.703938	-0.069414	-0.751929	-0.794254	0.238458
		Age6-10	α=0.9	-0.179047	-0.429075	0.181251	0.520117	0.612782	-0.658615	0.433585	0.145213	-0.727701	-0.24223	-0.751385	-0.65589	-0.0655705
		Age11-19	α=0.9	-0.299083	-0.554005	-0.112764	0.574232	1.11697	-0.76856	0.29747	0.135332	-0.759024	-0.316921	-0.763225	-0.283673	-0.169426
		Age20-44	α=0.9	0.0670688	-0.79031	-0.143603	0.471099	0.781145	-0.649947	0.440905	-0.0889628	-0.784794	-0.224734	-0.796891	-0.405566	-0.169022
		Age45-59	α=0.9	-0.0920369	-0.473819	-0.0798398	0.268073	0.926662	-0.701896	0.260938	-0.105277	-0.764269	-0.116093	-0.717922	-0.250254	-0.158048
		Age60+	α=0.9	-0.13862	-0.670196	0.0623588	0.360696	0.768925	-0.727099	0.754491	0.310522	-0.735479	-0.0844195	-0.647436	-0.570769	-0.0360735
		MEAN	α=0.9	-0.059308	-0.595036	-0.0602967	0.467163	0.860356	-0.685931	0.441562	0.0387553	-0.764492	-0.195858	-0.763743	-0.440716	-0.119546
		Age0-5	α=0.8	0.426646	0.1762	0.283042	1.00633	0.786314	-0.454413	0.35833	0.322983	-0.74448	-0.168197	-0.638675	-0.772415	0.15328
		Age6-10	α=0.8	-0.15368	-0.30862	0.0131309	0.260529	0.639745	-0.655294	0.349735	0.00422006	-0.771862	-0.495779	-0.822213	-0.654428	-0.131822
		Age11-19	α=0.8	-0.133988	-0.683606	-0.157558	0.354968	0.889888	-0.653673	0.241971	-0.385336	-0.810062	-0.451417	-0.825742	-0.526585	-0.236061
		Age20-44	α=0.8	0.155376	-0.491166	-0.315823	-0.121928	0.931271	-0.577025	0.0402724	-0.619742	-0.84056	-0.525954	-0.823689	-0.492749	-0.310517
		Age45-59	α=0.8	0.123558	-0.596241	-0.22329	0.120482	0.928161	-0.632281	0.195738	-0.456643	-0.819244	-0.240218	-0.737904	-0.603611	-0.240468
		Age60+	α=0.8	-0.123814	-0.641746	0.0219828	0.326413	0.789302	-0.67676	0.918462	0.162817	-0.728656	0.0432178	-0.660583	-0.509191	-0.0258457
		MEAN	α=0.8	0.0506922	-0.512885	-0.188369	0.148746	0.877211	-0.611732	0.279543	-0.353675	-0.808864	-0.367702	-0.794584	-0.557355	-0.208891
		Age0-5	α=0.7	0.37168	0.301115	0.256085	0.981009	0.801519	-0.345199	0.393756	0.261837	-0.715925	-0.170033	-0.782298	-0.780452	0.151845
		Age6-10	α=0.7	-0.196608	-0.307044	0.083009	0.28576	0.62135	-0.57978	0.414209	-0.0239772	-0.737087	-0.719152	-0.760718	-0.628167	-0.107624
		Age11-19	α=0.7	-0.167832	-0.44362	-0.119308	0.208347	0.828175	-0.620706	0.125132	-0.137679	-0.774821	-0.537931	-0.836014	-0.466596	-0.238841
		Age20-44	α=0.7	0.108981	-0.452839	-0.334145	-0.0110571	0.705247	-0.454497	0.0615363	-0.570158	-0.829446	-0.542025	-0.827554	-0.494632	-0.308582
		Age45-59	α=0.7	0.106034	-0.454667	-0.303272	-0.0248792	0.872848	-0.490805	0.198929	-0.483214	-0.795775	-0.444017	-0.746619	-0.625559	-0.269469
		Age60+	α=0.7	-0.236357	-0.508293	0.0864464	0.271855	0.686821	-0.510873	0.946072	0.233243	-0.729198	-0.0328039	-0.374371	-0.420568	-0.00349482
		MEAN	α=0.7	0.00211436	-0.408292	-0.195473	0.134739	0.750016	-0.495455	0.278764	-0.298546	-0.791921	-0.449178	-0.781548	-0.539575	-0.208737
		Age0-5	α=0.6	0.302178	0.410627	0.196398	0.900613	0.909851	-0.472549	0.352529	0.0831133	-0.762586	0.0134386	-0.782482	-0.803085	0.118356
		Age6-10	α=0.6	-0.183527	-0.29839	-0.00365466	0.255586	0.622502	-0.621229	0.335694	-0.205996	-0.796291	-0.492247	-0.83718	-0.696633	-0.154534
		Age11-19	α=0.6	-0.230307	-0.50103	-0.25864	0.214645	0.898164	-0.550419	-0.119703	-0.429468	-0.799005	-0.491974	-0.841054	-0.384549	-0.323907
		Age20-44	α=0.6	0.0765643	-0.521623	-0.470893	-0.131676	1.02783	-0.353001	0.0355626	-0.615513	-0.849187	-0.647712	-0.845439	-0.543382	-0.359957
		Age45-59	α=0.6	-0.00477306	-0.451724	-0.309203	0.0913249	1.0464	-0.436656	0.109674	-0.571652	-0.830939	-0.353332	-0.785287	-0.638177	-0.291429
		Age60+	α=0.6	-0.152686	-0.576709	0.0734253	0.280606	0.613477	-0.672856	1.01311	0.202595	-0.729731	0.0369072	-0.458837	-0.406749	0.00366023
		MEAN	α=0.6	-0.0309265	-0.447684	-0.280811	0.106391	0.917757	-0.46666	0.206115	-0.387895	-0.815064	-0.443174	-0.808048	-0.55398	-0.250742
		Age0-5	α=0.5	0.282838	0.748927	0.138858	0.842236	0.702557	-0.351886	0.372283	0.038553	-0.745664	-0.23768	-0.732201	-0.779103	0.13346
		Age6-10	α=0.5	-0.11484	-0.353563	-0.0988616	0.222139	0.484668	-0.443915	0.265015	-0.195647	-0.759594	-0.586	-0.790001	-0.661278	-0.171118
		Age11-19	α=0.5	-0.158879	-0.17365	-0.425897	0.155701	0.776391	-0.632239	-0.170895	-0.446559	-0.804741	-0.618191	-0.824642	-0.419006	-0.33524
		Age20-44	α=0.5	0.0127257	-0.287106	-0.535661	-0.251556	0.794068	-0.270372	0.0422538	-0.734018	-0.845061	-0.624758	-0.833457	-0.529705	-0.384284
		Age45-59	α=0.5	0.0837433	-0.433123	-0.39069	-0.173479	0.962309	-0.443934	0.126186	-0.637203	-0.839043	-0.503954	-0.789997	-0.661182	-0.330759
		Age60+	α=0.5	-0.197889	-0.533487	0.0754816	0.315124	0.605642	-0.432151	0.849382	0.193892	-0.696942	-0.125706	-0.534814	-0.39872	-0.0169538
		MEAN	α=0.5	-0.0311561	-0.278584	-0.352373	0.00313693	0.767379	-0.392619	0.174063	-0.454145	-0.808326	-0.516449	-0.798084	-0.551551	-0.272459
		Age0-5	α=0.4	0.365073	0.664916	0.192283	0.810474	0.650686	-0.0629505	0.41789	-0.133174	-0.70111	-0.431717	-0.762743	-0.720155	0.158446
		Age6-10	α=0.4	-0.128774	-0.244108	-0.00512278	0.202197	0.392794	-0.39153	0.471436	-0.316894	-0.736659	-0.528136	-0.796654	-0.641671	-0.109553
		Age11-19	α=0.4	-0.180786	-0.275192	-0.146961	0.218139	0.709119	-0.434375	0.0822576	-0.250641	-0.713187	-0.606258	-0.810223	-0.403724	-0.23522
		Age20-44	α=0.4	0.13106	-0.373746	-0.34517	-0.0944874	0.602199	-0.169831	0.151927	-0.480781	-0.726227	-0.655973	-0.816289	-0.521009	-0.282753
		Age45-59	α=0.4	0.0194288	-0.313792	-0.185987	-0.0493309	0.782102	-0.263316	0.465983	-0.386837	-0.786836	-0.505781	-0.76979	-0.49194	-0.207358
		Age60+	α=0.4	-0.148	-0.27059	0.0384382	0.244808	0.544531	-0.338434	0.676333	0.144799	-0.588872	-0.167735	-0.607714	-0.506277	-0.0279537
		MEAN	α=0.4	0.011403	-0.266588	-0.193078	0.0807217	0.630003	-0.258116	0.309419	-0.293878	-0.71472	-0.536398	-0.791335	-0.52531	-0.190341
		Age0-5	α=0.3	0.629245	0.497637	0.176656	0.768075	0.839372	-0.0615646	0.226588	-0.242946	-0.751318	-0.429415	-0.618511	-0.717137	0.128384
		Age6-10	α=0.3	-0.165331	-0.406158	-0.434555	0.128828	1.23779	-0.106269	0.748964	-0.55613	-0.498992	-0.478453	-0.258786	-0.572205	-0.0257829
		Age11-19	α=0.3	-0.183988	-0.360356	-0.431024	-0.0612729	0.92061	-0.464817	-0.157283	-0.470157	-0.797067	-0.657247	-0.827888	-0.353736	-0.359105
		Age20-44	α=0.3	-0.0213157	-0.263271	-0.542944	-0.268952	0.805273	-0.126182	0.0114638	-0.756271	-0.831602	-0.715054	-0.830262	-0.516376	-0.393247
		Age45-59	α=0.3	-0.00042289	-0.303457	-0.40914	-0.226218	0.996951	-0.221801	0.115727	-0.686144	-0.845526	-0.573324	-0.786589	-0.566372	-0.341098
		Age60+	α=0.3	-0.121252	-0.368269	0.0688586	0.322138	0.679876	-0.503595	0.855963	0.18409	-0.675894	-0.175314	-0.603542	-0.446285	0.00253241
		MEAN	α=0.3	-0.0333355	-0.283	-0.361712	-0.0549925	0.828389	-0.255341	0.150777	-0.493818	-0.799956	-0.592508	-0.79822	-0.524778	-0.281428
		Age0-5	α=0.2	0.570386	0.493826	0.117659	0.706464	0.697962	-0.0490822	0.250549	-0.2784	-0.694777	-0.650088	-0.707432	-0.764	0.101863
		Age6-10	α=0.2	0.11182	-0.252673	-0.164709	0.144012	0.454376	-0.455556	0.270589	-0.484909	-0.764281	-0.691567	-0.801251	-0.592931	-0.148606
		Age11-19	α=0.2	-0.244354	-0.133502	-0.431506	0.0193534	0.813424	-0.44695	-0.128828	-0.382544	-0.781813	-0.57543	-0.834613	-0.465595	-0.343997
		Age20-44	α=0.2	0.0992408	-0.146408	-0.500972	-0.331195	0.81943	-0.0637369	-0.0747528	-0.774713	-0.83149	-0.614249	-0.831617	-0.512376	-0.371184
		Age45-59	α=0.2	0.0375707	-0.311653	-0.393747	-0.2223	0.862841	-0.143054	0.175288	-0.740361	-0.819619	-0.459694	-0.777141	-0.631544	-0.328652
		Age60+	α=0.2	0.147151	-0.337234	0.0377099	0.199549	0.459992	-0.432593	0.956207	0.09041	-0.63842	-0.0674591	-0.558823	-0.383444	0.0378778
		MEAN	α=0.2	0.059088	-0.17363	-0.348606	-0.0875833	0.7447	-0.211136	0.150704	-0.524937	-0.78538	-0.505356	-0.799396	-0.537598	-0.260425
		Age0-5	α=0.1	0.664086	0.555652	0.0485309	0.517288	0.794514	-0.0484175	0.197052	-0.310518	-0.684265	-0.711054	-0.654904	-0.790798	0.08208
		Age6-10	α=0.1	0.131452	-0.222773	-0.381672	-0.00537477	0.439755	-0.27229	-0.00379232	-0.477703	-0.673436	-0.737256	-0.764275	-0.665172	-0.236696
		Age11-19	α=0.1	-0.180076	-0.181022	-0.519375	-0.147791	0.817476	-0.451582	-0.179688	-0.593858	-0.778085	-0.720389	-0.818122	-0.516945	-0.382625
		Age20-44	α=0.1	0.00118862	-0.146242	-0.57146	-0.293861	0.795771	-0.142178	0.0412355	-0.730988	-0.804055	-0.719405	-0.819694	-0.583578	-0.384243
		Age45-59	α=0.1	0.0126326	-0.250392	-0.457708	-0.251817	0.986849	-0.149777	0.114902	-0.68483	-0.796937	-0.582808	-0.775956	-0.640843	-0.345578
		Age60+	α=0.1	-0.0561068	-0.204178	0.00880315	0.233862	0.400531	-0.441026	0.995429	0.185035	-0.66634	-0.408908	-0.199228	-0.165833	0.0385067
		MEAN	α=0.1	0.00553773	-0.145727	-0.42017	-0.114953	0.751483	-0.235242	0.139475	-0.501796	-0.767954	-0.650071	-0.760803	-0.549698	-0.281902

## Sheet: Table S5-S6
	Table S5 Dietary structure of different countries and age groups under different optimization schemes																		Table S6 Dietary structural deviations between identified diJFS and current dietacross countries and age groups calculated from 13 major food groups													Table S5 Dietary structural deviations between identified diJFS and current dietacross countries and age groups calculated from 13 major food groups
	ISO3	Region	Age group	scenario	Cereal	Root	Vegetable	Fruits	Legumes/Nuts	Eggs	Dairy	Fish	Red Meat	Poultry	Sugar	Fat&oil			ISO3	Region	scenario	Age0-5	Age6-10	Age11-19	Age20-44	Age45-59	Age60+					ISO3	Region	Age group	scenario	Cereal	Root	Vegetable	Fruits	Legumes/Nuts	Eggs	Dairy	Fish	Red Meat	Poultry	Sugar	Fat&oil	DSDs
	AGO	4	Age0-5	Current diet	102.131	285.39	18.0285	172.742	12.2715	2.3082	20.7003	6.6178	8.8704	7.6587	8.3106	27.1132			AGO	4	α=1.0; HOS	1.85065	1.87987	1.64692	1.70742	1.04996	1.41407					AGO	4	Age0-5	α=1.0; HOS	0.846875	0.9	3.20652	0.272661	0.647207	0.262239	12.2574	0.811372	0.595497	0.97386	0.646464	0.787698	1.85065
	ALB	1	Age0-5	Current diet	93.8805	32.2313	145.112	121.128	7.3972	6.7016	636.208	1.4069	13.864	5.1313	44.6447	20.407			ALB	1	α=1.0; HOS	1.03533	0.578722	0.517722	0.621085	0.662048	0.327296					ALB	1	Age0-5	α=1.0; HOS	0.477728	2.38898	0.185282	0.347026	1.275	0	0.480517	4.96773	0.544107	0.900006	0.339534	0.518023	1.03533
	ARE	5	Age0-5	Current diet	97.9863	17.6403	29.8298	56.6634	31.3976	5.1621	30.7992	4.874	4.756	12.5143	37.0564	44.5391			ARE	5	α=1.0; HOS	1.54341	0.761941	1.39576	1.58401	0.767068	0.952747					ARE	5	Age0-5	α=1.0; HOS	0.408385	3.07738	3.99172	0.854472	0.065091	1.20771	6.64137	0.296492	0.343692	0.43221	0.359509	0.842886	1.54341
	ARG	7	Age0-5	Current diet	111.097	62.0868	52.4442	68.2187	1.222	17.7696	622.809	2.0831	31.7873	15.7745	57.7331	46.0842			ARG	7	α=1.0; HOS	1.66759	1.44462	1.54436	2.12704	1.76692	0.75324					ARG	7	Age0-5	α=1.0; HOS	0.608568	0.543557	0.671157	1.12799	10.5366	0.74009	0.427222	2.26125	0.896729	0.516859	0.849227	0.831919	1.66759
	ARM	1	Age0-5	Current diet	77.643	33.9509	125.319	68.5146	1.896	13.2823	389.604	0.7036	11.909	5.6798	36.7557	27.956			ARM	1	α=1.0; HOS	3.62082	2.12674	1.60258	1.38877	1.50675	1.80236					ARM	1	Age0-5	α=1.0; HOS	1.24643	0.839972	0.428426	2.22556	5.75533	0.900002	0.17755	26.8607	0.8395	2.47012	0.899999	0.806242	3.62082
	ATG	7	Age0-5	Current diet	75.3036	25.8756	52.6803	160.221	2.5246	0	138.028	19.13	12.984	26.8921	37.9569	37.0503			ATG	7	α=1.0; HOS	1.60009	0.888189	1.27795	1.30032	0.715446	0.843871					ATG	7	Age0-5	α=1.0; HOS	0.220817	5.30297	1.81227	0.449923	7.32112	#DIV/0!	1.06144	0.0185311	0.054675	0.110233	0.769265	0.479761	1.60009
	AUS	2	Age0-5	Current diet	58.986	32.0187	69.7392	97.9808	9.4394	6.9276	1063.54	5.0122	36.5064	18.6498	43.965	77.2136			AUS	2	α=1.0; HOS	0.864981	0.644936	0.52444	0.49631	0.610721	0.923937					AUS	2	Age0-5	α=1.0; HOS	1.21595	2.56969	0.611937	0.774843	1.28288	0.422701	0.691022	0	0.674898	0.899999	0.381483	0.854378	0.864981
	AUT	1	Age0-5	Current diet	81.8585	42.2505	79.3977	194.312	5.5865	12.603	935.336	3.3941	35.1912	7.7966	46.761	135.737			AUT	1	α=1.0; HOS	1.3835	1.56176	0.894929	0.903314	0.951044	1.13807					AUT	1	Age0-5	α=1.0; HOS	0.783018	0.749376	1.06679	0.0476523	5.74381	0.864913	0.697064	3.1751	0.852213	0.899495	0.878422	0.844173	1.3835
	AZE	1	Age0-5	Current diet	122.638	56.6373	72.6139	59.8302	2.3095	8.4848	296.766	0.5602	9.6319	3.6663	14.7921	11.9134			AZE	1	α=1.0; HOS	3.37513	2.37939	1.99295	1.7129	1.47645	2.55558					AZE	1	Age0-5	α=1.0; HOS	0.50821	0.885309	1.37153	2.43994	4.35757	0.899998	0.303205	25.5173	0.771478	1.74298	0.899994	0.804044	3.37513
	BEL	1	Age0-5	Current diet	89.2049	77.1208	140.009	67.1714	4.6427	13.5132	936.834	6.4816	24.1135	9.4374	50.6986	148.957			BEL	1	α=1.0; HOS	1.38561	1.38951	1.06372	0.926916	1.0572	1.49954					BEL	1	Age0-5	α=1.0; HOS	0.672231	0.9	0.228026	2.18251	5.72199	0.899994	0.711644	1.71828	0.899998	0.897228	0.899999	0.895473	1.38561
	BEN	4	Age0-5	Current diet	143.882	268.579	26.289	28.2176	35.238	1.0299	9.2302	5.0647	3.4574	6.0377	2.9535	22.989			BEN	4	α=1.0; HOS	3.29598	2.18867	4.21966	4.68757	1.86483	2.49904					BEN	4	Age0-5	α=1.0; HOS	0.256443	0.889226	2.56814	4.40895	0.39534	0.413827	26.4955	1.24343	0.568693	1.30861	0.380159	0.623394	3.29598
	BFA	4	Age0-5	Current diet	255.772	14.4925	13.3459	5.0597	33.9455	3.5058	40.8789	2.8382	8.1844	1.1964	4.0022	19.569			BFA	4	α=1.0; HOS	4.10632	2.94293	2.04476	2.5739	2.18891	1.82162					BFA	4	Age0-5	α=1.0; HOS	0.202503	0.160731	4.29392	22.5205	0.392618	0.0883108	5.64907	1.67444	0.826609	12.2866	0.482635	0.697869	4.10632
	BGD	6	Age0-5	Current diet	144.497	48.8833	12.0931	20.2593	2.6955	1.8639	43.5313	6.4868	1.6939	0.7035	13.9385	21.7421			BGD	6	α=1.0; HOS	3.23527	2.68091	2.81016	2.21115	2.19878	3.8682					BGD	6	Age0-5	α=1.0; HOS	0.097166	0.998237	9.36225	4.90634	11.533	0.899995	4.33707	1.55183	0.695023	2.70618	0.899996	0.836134	3.23527
	BGR	1	Age0-5	Current diet	102.242	24.5436	31.5117	38.3048	4.728	9.7682	321.611	1.4099	16.8361	8.7856	33.0306	41.5268			BGR	1	α=1.0; HOS	2.78006	1.73933	1.26746	1.74234	1.66165	2.05365					BGR	1	Age0-5	α=1.0; HOS	0.640151	0.899452	4.16754	3.8062	4.69992	0.900002	0.0548825	13.7809	0.856796	1.75492	0.899996	0.899995	2.78006
	BHS	7	Age0-5	Current diet	67.6814	43.1821	75.382	228.413	1.1367	11.1465	24.0353	9.1919	21.1561	25.6964	53.6273	42.74			BHS	7	α=1.0; HOS	3.11115	2.56817	3.11439	2.76763	3.18146	2.36946					BHS	7	Age0-5	α=1.0; HOS	1.14553	0.754581	0.856569	0.0898885	19.1931	0.899996	10.9576	1.06774	0.9	0.0688307	0.764816	0.635248	3.11115
	BIH	1	Age0-5	Current diet	110.846	58.0535	76.2971	76.7253	6.502	4.1797	341.179	1.2789	8.6482	5.5191	21.7459	23.6615			BIH	1	α=1.0; HOS	2.31571	1.34432	1.17283	1.00775	1.29066	1.93613					BIH	1	Age0-5	α=1.0; HOS	0.501789	0.812187	0.642449	1.33599	4.53811	0.899993	0.151889	13.2291	0.737945	3.33544	0.867051	0.736555	2.31571
	BLR	1	Age0-5	Current diet	67.6306	143.393	59.9592	52.5665	3.1188	19.1282	589.163	3.6821	24.2294	9.6484	38.7745	52.7762			BLR	1	α=1.0; HOS	1.36038	0.979773	0.877885	0.939834	0.824987	1.03772					BLR	1	Age0-5	α=1.0; HOS	1.63983	0.685697	1.34942	2.79589	1.86636	0.899996	0.41301	3.9767	0.790201	0.107448	0.900001	0.899997	1.36038
	BLZ	7	Age0-5	Current diet	143.485	18.8412	32.7515	170.496	15.6619	10.2501	30.713	5.6377	9.5852	12.0707	51.8098	43.7076			BLZ	7	α=1.0; HOS	1.80711	1.37104	2.093	2.41954	1.50611	1.28663					BLZ	7	Age0-5	α=1.0; HOS	0.208135	0.371038	2.7553	0.0919818	0.489762	0.900001	11.0046	2.19063	0.900002	0.982296	0.899998	0.891625	1.80711
	BOL	7	Age0-5	Current diet	120.944	104.966	25.2101	61.253	9.5094	7.5768	107.195	0.632	15.7091	16.6003	31.2004	21.591			BOL	7	α=1.0; HOS	1.12762	0.968136	0.927804	0.99875	1.63714	0.906876					BOL	7	Age0-5	α=1.0; HOS	0.295866	0.601942	3.95116	1.64818	0.678245	0.0877679	2.05321	2.47975	0.372886	0.441402	0.714068	0.206947	1.12762
	BRA	7	Age0-5	Current diet	113.815	61.7715	39.5396	124.876	18.2495	12.4218	358.224	3.2018	24.4228	18.3749	52.746	58.1127			BRA	7	α=1.0; HOS	0.968415	0.697959	0.689228	0.771472	0.738874	0.733888					BRA	7	Age0-5	α=1.0; HOS	0.480524	0.826177	1.11383	0.317432	0.415485	0.849724	0.104182	4.61428	0.899999	0.302195	0.834399	0.862755	0.968415
	BRB	7	Age0-5	Current diet	99.4027	67.5296	53.6539	108.206	11.8791	10.1468	43.71	14.3549	12.3499	22.9573	68.5508	63.2506			BRB	7	α=1.0; HOS	1.33162	1.03246	1.41978	1.69627	1.18986	0.983217					BRB	7	Age0-5	α=1.0; HOS	0.591307	0.47551	1.74235	0.659004	1.27776	0.899998	6.77234	0.124877	0.895181	0.899548	0.887959	0.753598	1.33162
	BRN	6	Age0-5	Current diet	153.137	26.897	53.9714	93.2315	10.1034	22.217	27.3968	9.3596	13.1795	43.2032	68.4861	48.3804			BRN	6	α=1.0; HOS	1.82313	1.84206	2.85816	2.98811	2.71076	1.49782					BRN	6	Age0-5	α=1.0; HOS	0.0919407	6.55184	0.859157	0.933432	1.71393	0.0686546	8.27602	0.513751	0.780773	0.446159	0.89833	0.743595	1.82313
	BWA	4	Age0-5	Current diet	136.088	46.9644	29.0603	30.4408	6.9809	2.5484	123.543	1.3171	16.6811	2.277	15.8944	34.079			BWA	4	α=1.0; HOS	1.37255	1.13195	1.34718	1.45905	0.941826	1.0222					BWA	4	Age0-5	α=1.0; HOS	0.550434	0.51509	2.68796	2.81202	1.52181	0.631377	1.46939	2.99575	0.744819	0.743917	0.899996	0.89804	1.37255
	CAF	4	Age0-5	Current diet	74.3629	235.864	14.3467	32.4594	10.6414	0.9939	36.4581	3.3575	21.6128	0.6821	4.9641	47.3613			CAF	4	α=1.0; HOS	4.75217	2.25352	4.55022	4.29045	3.26572	3.44896					CAF	4	Age0-5	α=1.0; HOS	1.546	0.896523	2.94707	3.65149	0.304847	0.873529	7.45855	3.15869	0.793201	34.0793	0.480389	0.836434	4.75217
	CAN	2	Age0-5	Current diet	70.8168	49.6826	71.0085	122.043	16.6899	11.4917	696.894	4.0944	21.5855	15.0992	46.5137	110.841			CAN	2	α=1.0; HOS	0.774619	0.56855	0.572565	0.503205	0.506947	0.672399					CAN	2	Age0-5	α=1.0; HOS	1.03714	0.276097	1.05458	0.625004	0.348193	0.283605	0.587695	1.64432	0.880818	0.896538	0.836498	0.824944	0.774619
	CHE	1	Age0-5	Current diet	74.1842	30.3933	77.1372	141.439	5.6769	9.4771	1136.98	4.2139	25.7491	6.6045	56.2867	98.4132			CHE	1	α=1.0; HOS	0.919098	1.43194	1.10493	0.827341	0.749178	0.887011					CHE	1	Age0-5	α=1.0; HOS	1.04192	0.794905	0.695612	0.634606	2.09444	0.505956	0.706603	1.25981	0.770361	0.887562	0.795056	0.84236	0.919098
	CHL	7	Age0-5	Current diet	132.102	91.9211	50.16	58.4869	5.4443	13.5864	259.892	5.0613	20.257	16.1465	58.7827	35.2296			CHL	7	α=1.0; HOS	0.591171	0.349711	0.488936	0.706476	0.438038	0.544041					CHL	7	Age0-5	α=1.0; HOS	0.000856916	0.146002	1.9825	2.09006	0.0810205	0.470419	0.252065	0.0454231	0.687747	0.282829	0.503194	0.551936	0.591171
	CHN	3	Age0-5	Current diet	143.654	81.2569	286.548	109.849	12.5139	26.7364	126.031	12.0209	34.6131	8.9535	11.4884	27.0032			CHN	3	α=1.0; HOS	0.616641	0.856926	1.00935	1.27025	1.00112	0.624078					CHN	3	Age0-5	α=1.0; HOS	0.00713798	0.483922	0.382329	0.453331	0.48423	0.899998	1.65504	0.0811254	0.895415	0.735947	0.892901	0.428323	0.616641
	CIV	4	Age0-5	Current diet	137.319	274.221	21.9565	53.2726	11.9816	1.8818	3.8736	7.9655	10.3387	0.87	5.8778	39.1008			CIV	4	α=1.0; HOS	6.96886	4.09115	7.08821	8.37372	3.76048	6.52851					CIV	4	Age0-5	α=1.0; HOS	0.210329	0.850091	1.70402	0.274372	1.45232	0.026092	77.5576	0.211098	0.438227	0.0452874	0.0469223	0.809919	6.96886
	CMR	4	Age0-5	Current diet	139.121	137.5	84.2617	72.8631	30.0788	0.4914	24.7031	7.5842	7.7345	1.6117	7.2628	30.8431			CMR	4	α=1.0; HOS	1.35362	1.32794	1.71121	1.43812	1.20514	1.47633					CMR	4	Age0-5	α=1.0; HOS	0.305372	0.88941	0.355573	1.20669	0.0381764	0.0964591	10.0619	0.691134	0.260999	0.731712	0.761043	0.84498	1.35362
	COG	4	Age0-5	Current diet	79.4024	233.524	8.7455	43.4292	7.5478	0.8975	1.5996	9.9238	12.0194	10.7688	7.551	27.872			COG	4	α=1.0; HOS	16.3097	12.8719	18.1569	18.5923	10.2683	12.1291					COG	4	Age0-5	α=1.0; HOS	1.13244	0.887052	8.55906	2.44554	1.91625	0.899944	175.788	0.652331	0.612909	1.22195	0.87554	0.725255	16.3097
	COL	7	Age0-5	Current diet	91.579	70.0095	29.9167	97.7797	6.1072	15.2456	260.077	2.2555	12.1862	10.8121	65.0946	51.4734			COL	7	α=1.0; HOS	1.3027	0.782302	1.15122	1.25263	0.914839	0.888729					COL	7	Age0-5	α=1.0; HOS	0.795065	0.794298	2.2875	0.889579	3.13939	0.838098	0.427094	3.254	0.718189	0.805986	0.835169	0.847974	1.3027
	CPV	4	Age0-5	Current diet	152.716	46.6125	56.4976	63.8444	8.7241	6.1228	144.843	4.9375	13.3005	7.8275	11.4961	38.0111			CPV	4	α=1.0; HOS	0.97256	0.720424	0.7784	0.800906	0.615858	0.688562					CPV	4	Age0-5	α=1.0; HOS	0.139829	0.745652	0.615978	1.61124	1.68741	0.737555	1.05697	1.77811	0.842254	1.04362	0.681553	0.730555	0.97256
	CRI	7	Age0-5	Current diet	117.197	31.7756	34.9853	142.169	12.3314	12.5382	457.688	3.6535	12.8925	9.4701	65.9158	60.3998			CRI	7	α=1.0; HOS	0.379842	0.293602	0.28245	0.327321	0.361777	0.451542					CRI	7	Age0-5	α=1.0; HOS	0.225962	1.79327	0.399999	0.0669885	0.409102	0.00106076	0.276498	0.000739017	0.000705837	0.000876443	0.552927	0.829976	0.379842
	CYP	1	Age0-5	Current diet	57.4051	18.9514	78.8447	96.2602	7.3003	7.319	450.591	5.9315	22.9496	10.8247	30.1522	56.7392			CYP	1	α=1.0; HOS	0.943227	1.19326	0.860217	0.716418	0.753059	0.770179					CYP	1	Age0-5	α=1.0; HOS	1.2309	0.219229	0.646409	1.11725	3.75515	0.842397	0.273054	0.00244458	0.817457	0.86565	0.883498	0.665283	0.943227
	CZE	1	Age0-5	Current diet	71.678	51.241	31.0279	52.2226	5.1792	14.7952	381.59	1.9607	24.9814	9.3054	47.4857	64.6075			CZE	1	α=1.0; HOS	1.73625	1.1404	1.15293	0.900254	1.16543	1.60687					CZE	1	Age0-5	α=1.0; HOS	0.511038	0.0322984	3.08034	3.96091	4.95409	0.217861	0.244476	5.18034	0.423659	0.796086	0.714668	0.719198	1.73625
	DEU	1	Age0-5	Current diet	80.5092	50.7486	69.4769	94.3059	5.1783	11.8608	1186.49	3.2399	28.6461	7.2689	48.3308	104.146			DEU	1	α=1.0; HOS	1.67449	1.19817	1.04099	0.776677	1.05109	1.37275					DEU	1	Age0-5	α=1.0; HOS	0.609296	0.76527	1.46062	1.76546	5.44306	0.861805	0.727972	5.12216	0.713591	0.89938	0.860621	0.864601	1.67449
	DJI	4	Age0-5	Current diet	205.282	30.5874	54.6675	13.9449	14.9851	0	30.116	0.8123	8.1399	0.371	16.7089	42.4386			DJI	4	α=1.0; HOS	1.81984	1.31071	2.45725	2.42223	2.01418	1.71989					DJI	4	Age0-5	α=1.0; HOS	0.0903798	0.00312874	0.269796	2.01383	0.663312	#DIV/0!	9.48541	3.27342	0.245765	2.43612	0.895092	0.641975	1.81984
	DMA	7	Age0-5	Current diet	92.4639	114.861	57.7347	284.394	1.5026	0	237.101	9.8508	10.3691	13.9267	53.2099	25.9879			DMA	7	α=1.0; HOS	1.42341	1.1861	1.55537	1.26962	1.15478	1.09128					DMA	7	Age0-5	α=1.0; HOS	0.699961	0.700113	1.55861	0.00188295	9.44696	#DIV/0!	0.295536	0.431701	0.501422	0.718117	0.812901	0.490355	1.42341
	DNK	1	Age0-5	Current diet	106.498	43.9888	93.8804	111.975	3.606	13.206	2089.13	6.2771	20.7307	10.6918	52.9507	104.139			DNK	1	α=1.0; HOS	1.53193	2.03968	1.20501	1.02452	1.13482	2.18417					DNK	1	Age0-5	α=1.0; HOS	0.818721	1.19456	1.11706	1.48332	6.47221	0.9	0.832878	2.31994	0.67715	0.874783	0.800811	0.891706	1.53193
	DOM	7	Age0-5	Current diet	87.4562	27.5228	42.7205	189.557	9.3881	10.8757	112.536	2.8489	10.7344	12.6796	37.1963	65.1297			DOM	7	α=1.0; HOS	1.1106	0.982016	0.849114	0.995524	0.918891	0.770979					DOM	7	Age0-5	α=1.0; HOS	0.82493	0.263302	2.20971	0.52216	1.03369	0.82117	1.9377	2.46825	0.636095	0.899997	0.889102	0.821091	1.1106
	DZA	5	Age0-5	Current diet	163.111	98.712	60.7175	70.3589	6.1109	7.2701	181.839	1.1525	5.7132	2.7135	33.3135	42.1769			DZA	5	α=1.0; HOS	2.30619	0.235917	0.56139	0.514178	0.334706	0.551801					DZA	5	Age0-5	α=1.0; HOS	0.312001	0.741375	1.95024	2.06114	4.12828	0.6964	0.684378	14.4717	0.692589	0.896591	0.490408	0.549258	2.30619
	ECU	7	Age0-5	Current diet	94.2446	28.0383	20.0726	147.187	3.1609	10.5353	471.231	2.2676	17.3952	9.9121	22.4139	68.6839			ECU	7	α=1.0; HOS	1.38934	0.952589	0.967639	1.25649	0.969386	0.893856					ECU	7	Age0-5	α=1.0; HOS	0.733715	0.156875	2.84835	0.00582525	6.41083	0.899993	0.29868	2.21582	0.856846	0.846077	0.581264	0.817762	1.38934
	EGY	5	Age0-5	Current diet	191.483	57.7578	98.9738	66.6898	7.167	3.3158	175.521	5.3829	6.4275	4.378	41.4318	20.3936			EGY	5	α=1.0; HOS	1.38195	0.847016	0.86842	0.949251	0.757626	0.877196					EGY	5	Age0-5	α=1.0; HOS	0.317363	0.590035	0.764624	2.2654	4.03997	0.899994	0.690993	2.83371	0.899992	1.7973	0.9	0.584002	1.38195
	ESP	1	Age0-5	Current diet	61.5491	45.5229	105.138	98.0463	12.1459	13.7075	520.019	11.417	30.959	11.0237	24.328	103.891			ESP	1	α=1.0; HOS	0.870752	0.908462	0.53343	0.45381	0.602495	0.860357					ESP	1	Age0-5	α=1.0; HOS	1.27396	0.596326	0.452173	1.2561	1.37741	0.900004	0.308003	0.825313	0.849533	0.865426	0.87923	0.865542	0.870752
	EST	1	Age0-5	Current diet	77.0028	89.1615	47.897	53.8098	5.2534	13.1456	742.482	2.6933	17.3967	8.3508	43.8949	31.3479			EST	1	α=1.0; HOS	1.91507	1.36042	1.09905	1.09978	1.09596	1.43064					EST	1	Age0-5	α=1.0; HOS	1.17257	0.868804	2.04998	3.01891	4.07999	0.899997	0.554686	5.73935	0.899912	1.89886	0.899997	0.897834	1.91507
	ETH	4	Age0-5	Current diet	193.058	55.1743	13.6463	5.6946	14.8474	0.4894	82.4099	0.094	4.4305	0.2908	3.6789	9.9772			ETH	4	α=1.0; HOS	11.9625	7.32445	7.84433	4.13869	1.72664	7.04094					ETH	4	Age0-5	α=1.0; HOS	0.085276	0.899999	2.65639	18.8948	0.796975	0.00980793	2.13516	116.153	0.382372	0.000343879	0.899997	0.635158	11.9625
	FIN	1	Age0-5	Current diet	88.0323	48.7257	65.6604	99.5706	3.0995	8.8923	1447.15	9.3464	23.8232	7.4635	30.6325	70.7507			FIN	1	α=1.0; HOS	1.28187	1.26149	0.932367	0.707954	1.03807	1.39975					FIN	1	Age0-5	α=1.0; HOS	0.688861	0.335942	0.957839	1.30086	6.7277	0.900003	0.754831	0.533211	0.807717	0.787794	0.792606	0.795054	1.28187
	FJI	2	Age0-5	Current diet	116.855	90.953	33.2489	101.535	15.2234	6.1012	108.826	11.0081	15.8443	16.1351	54.7783	59.187			FJI	2	α=1.0; HOS	1.10546	1.08906	1.49363	1.5736	1.29643	1.17084					FJI	2	Age0-5	α=1.0; HOS	0.429397	0.653538	3.5731	0.669833	0.967977	0.900003	1.65681	0.893115	0.899996	0.862071	0.899999	0.859724	1.10546
	FRA	1	Age0-5	Current diet	86.6929	40.302	79.175	115.047	4.5136	12.1295	1257.83	9.514	31.3326	9.7668	37.4742	95.7842			FRA	1	α=1.0; HOS	1.25221	1.27273	0.881582	0.832692	0.707494	1.14873					FRA	1	Age0-5	α=1.0; HOS	0.42693	0.708595	0.826913	1.17773	5.96801	0.864586	0.754596	1.09769	0.761561	0.861132	0.742031	0.836802	1.25221
	GBR	1	Age0-5	Current diet	80.0835	73.3658	73.2478	131.8	5.1243	9.7821	686.365	4.4724	21.9344	12.6134	38.6569	58.9749			GBR	1	α=1.0; HOS	1.3416	1.41251	0.752828	0.762635	0.955563	1.1109					GBR	1	Age0-5	α=1.0; HOS	0.517225	0.776097	1.61844	1.05524	6.00343	0.86599	0.559144	1.88006	0.762861	0.465402	0.898636	0.696608	1.3416
	GEO	1	Age0-5	Current diet	100.268	37.7838	24.7427	28.2507	4.9703	6.7307	270.643	1.854	6.1425	4.8412	30.6463	17.9104			GEO	1	α=1.0; HOS	1.74122	1.92297	1.08307	1.18736	1.68385	1.79462					GEO	1	Age0-5	α=1.0; HOS	0.838427	0.219504	4.91017	5.65022	1.1084	0.814685	0.0497091	4.54903	0.494115	1.1844	0.885095	0.1909	1.74122
	GHA	4	Age0-5	Current diet	112.497	387.68	31.8871	118.681	13.3769	1.532	3.5853	12.1583	6.4346	3.7579	6.2783	20.4392			GHA	4	α=1.0; HOS	7.21959	10.0439	9.22279	7.75726	4.62541	8.43903					GHA	4	Age0-5	α=1.0; HOS	0.519501	0.9	3.33663	0.333695	1.42744	0.9	70.6354	0.532797	0.899963	5.36779	0.899989	0.881923	7.21959
	GIN	4	Age0-5	Current diet	160.355	101.506	21.7613	70.9995	10.2425	2.4041	25.1569	3.8513	4.1505	0.7519	8.0088	43.3118			GIN	4	α=1.0; HOS	4.63028	2.71143	3.30389	3.15317	2.90958	3.06684					GIN	4	Age0-5	α=1.0; HOS	0.108782	0.9	3.7837	1.20997	1.18603	0.900004	10.649	3.30644	0.899964	30.823	0.899985	0.896455	4.63028
	GMB	4	Age0-5	Current diet	245.004	6.6053	25.076	7.5735	12.0264	0.4829	19.1415	11.2674	2.6024	2.1521	15.1456	50.511			GMB	4	α=1.0; HOS	4.01456	2.68019	2.11783	5.56414	2.6672	2.98932					GMB	4	Age0-5	α=1.0; HOS	0.186721	0.633113	2.09747	15.7623	0.380987	0.899979	14.5681	0.831523	0.899939	10.1183	0.899997	0.896278	4.01456
	GNB	4	Age0-5	Current diet	181.367	62.1277	15.5376	25.6662	7.1467	1.1179	30.4949	0.464	7.9078	0.9857	6.8306	42.4855			GNB	4	α=1.0; HOS	1.85205	2.12567	1.41154	2.90716	3.78833	1.16608					GNB	4	Age0-5	α=1.0; HOS	0.0242287	0.59825	3.43294	3.66468	1.2802	0.0381072	8.2257	3.62328	0.523597	0.0213047	0.0380933	0.75425	1.85205
	GRC	1	Age0-5	Current diet	93.1669	47.5758	174.496	163.928	9.6848	8.5244	965.473	5.1798	28.3853	5.9878	27.293	91.0134			GRC	1	α=1.0; HOS	1.20795	1.18839	0.732163	0.784804	0.913905	1.09576					GRC	1	Age0-5	α=1.0; HOS	0.528147	0.69793	0.0337481	0.275122	2.60541	0.899993	0.735998	3.02324	0.899325	2.99648	0.899996	0.899998	1.20795
	GRD	7	Age0-5	Current diet	80.2651	29.9449	28.1356	106.729	8.964	18.6409	25.9155	11.5506	7.537	18.1455	48.2122	43.53			GRD	7	α=1.0; HOS	1.71995	1.2822	1.49895	1.71218	1.42058	1.23813					GRD	7	Age0-5	α=1.0; HOS	0.624932	1.30113	2.33808	0.642302	1.7845	0.70591	11.0145	0.255078	0.380284	0.394941	0.388302	0.809435	1.71995
	GUY	7	Age0-5	Current diet	142.052	29.9891	59.2187	65.3195	8.1308	1.6994	128.893	9.3551	2.9784	16.0194	50.0087	16.5737			GUY	7	α=1.0; HOS	0.979089	0.972432	1.16574	1.0811	0.959702	0.772843					GUY	7	Age0-5	α=1.0; HOS	0.250708	0.759953	0.914915	1.31808	2.69807	0.900024	1.47702	0.561052	0.899946	0.49367	0.899995	0.575635	0.979089
	HND	7	Age0-5	Current diet	181.003	8.9242	41.6107	67.3184	9.0656	5.9431	246.059	1.1229	6.2946	10.4443	52.6815	50.1219			HND	7	α=1.0; HOS	1.8935	0.939481	1.32499	1.46669	1.11534	1.2605					HND	7	Age0-5	α=1.0; HOS	0.157117	0.899991	2.03293	1.73983	0.872661	0.900002	0.40463	12.2491	0.899994	1.29098	0.553608	0.721146	1.8935
	HRV	1	Age0-5	Current diet	72.7384	32.631	47.584	91.5767	4.2924	11.1609	421.26	4.5488	23.5084	3.8857	58.6695	44.6386			HRV	1	α=1.0; HOS	1.18251	1.41412	1.16687	1.05346	1.42557	1.04805					HRV	1	Age0-5	α=1.0; HOS	1.44505	0.630005	1.79959	0.871304	4.12879	0.886219	0.269703	1.01475	0.851138	0.586921	0.84038	0.866317	1.18251
	HTI	7	Age0-5	Current diet	89.9174	98.4184	15.2722	58.4613	18.0075	0.7264	21.2593	1.9313	5.7534	3.4395	21.2501	34.2908			HTI	7	α=1.0; HOS	2.46698	2.10104	2.49057	2.22781	2.20538	1.9933					HTI	7	Age0-5	α=1.0; HOS	1.11365	0.827007	2.73348	1.70238	0.188927	0.900055	15.0677	3.51628	0.89999	1.00204	0.879906	0.772344	2.46698
	HUN	1	Age0-5	Current diet	62.8195	46.1863	33.8569	60.3241	3.9094	15.4308	310.404	1.0607	19.9545	10.0075	36.1973	89.6442			HUN	1	α=1.0; HOS	2.84032	1.38131	1.24105	1.09682	1.56907	1.66276					HUN	1	Age0-5	α=1.0; HOS	1.32655	0.52886	4.27643	1.70619	4.43347	0.742716	0.148252	18.2643	0.688737	0.54608	0.551712	0.870626	2.84032
	IDN	6	Age0-5	Current diet	232.779	55.7243	41.1163	100.029	9.9131	6.3367	22.2149	11.4333	4.8853	4.9126	20.963	31.4027			IDN	6	α=1.0; HOS	1.96304	2.15052	4.36629	4.33263	2.17973	1.75441					IDN	6	Age0-5	α=1.0; HOS	0.466909	0.477476	2.97988	1.28038	2.34738	0.412091	11.4865	0.615255	0.240231	1.55073	0.832166	0.867429	1.96304
	IND	6	Age0-5	Current diet	174.81	29.9092	36.629	46.8091	8.6129	2.9243	194.52	1.7263	1.3136	0.9325	38.4991	25.9682			IND	6	α=1.0; HOS	2.12908	1.47522	1.96416	1.9957	1.8936	1.39272					IND	6	Age0-5	α=1.0; HOS	0.997121	3.49552	3.60515	4.13682	3.04309	0.90001	0.445802	6.09378	0.409409	0.684718	0.863108	0.874427	2.12908
	IRL	1	Age0-5	Current diet	89.4641	67.0069	105.518	169.187	5.2409	8.7695	2294.48	5.7404	25.1566	8.8832	45.5334	84.2651			IRL	1	α=1.0; HOS	1.2254	1.66426	0.896548	0.906837	1.08365	1.72198					IRL	1	Age0-5	α=1.0; HOS	2.46315	0.440689	0.739253	0.642725	2.96941	0.899994	0.84291	2.63034	0.801448	0.900002	0.474867	0.899999	1.2254
	IRN	6	Age0-5	Current diet	128.341	95.5835	97.6089	96.16	11.9436	6.5263	149.195	2.1327	4.138	9.7157	35.4189	36.0026			IRN	6	α=1.0; HOS	0.987549	0.662787	0.709597	0.628713	0.641047	0.5481					IRN	6	Age0-5	α=1.0; HOS	0.203462	0.778196	0.815799	1.0148	1.18911	0.045784	1.04966	4.00919	0.798236	0.705477	0.574575	0.666294	0.987549
	IRQ	5	Age0-5	Current diet	126.055	20.1404	55.5701	24.1338	2.4905	9.0848	26.3258	0.7609	1.9922	5.4244	22.222	46.707			IRQ	5	α=1.0; HOS	3.53051	1.65675	1.18134	2.64836	2.46736	1.5602					IRQ	5	Age0-5	α=1.0; HOS	0.667639	3.73383	0.202667	3.37108	8.38201	0.0290485	9.74862	14.4956	0.00532075	0.00838802	0.868221	0.853673	3.53051
	ISL	1	Age0-5	Current diet	55.7814	44.3366	57.6244	134.086	2.1276	7.9871	919.745	22.6971	29.5303	10.188	44.0058	71.3529			ISL	1	α=1.0; HOS	1.4754	1.904	1.15277	0.951222	1.04345	1.60453					ISL	1	Age0-5	α=1.0; HOS	1.54347	0.98402	1.24348	0.459521	9.29874	0	0.650667	0.450868	0.727561	0.9	0.633639	0.812895	1.4754
	ISR	5	Age0-5	Current diet	111.632	57.7332	68.8234	70.4461	15.2387	12.6966	428.003	4.884	12.8454	26.2272	44.4776	70.5132			ISR	5	α=1.0; HOS	0.792246	0.61104	0.495948	0.462129	0.486898	0.547195					ISR	5	Age0-5	α=1.0; HOS	0.117244	0.671792	1.25679	1.79182	0.941642	0.899997	0.321181	1.41112	0.83387	0.0876113	0.336945	0.836945	0.792246
	ITA	1	Age0-5	Current diet	106.713	28.0419	133.679	158.263	8.0344	11.2561	766.569	6.9655	29.8582	7.419	29.8394	109.052			ITA	1	α=1.0; HOS	0.683533	0.643889	0.612861	0.603034	0.674974	0.635371					ITA	1	Age0-5	α=1.0; HOS	0.393842	1.67206	0.164966	0.296915	1.62356	0.763239	0.601473	0.020257	0.787961	0.162717	0.841217	0.874193	0.683533
	JAM	7	Age0-5	Current diet	100.132	74.0653	71.2478	101.262	4.9467	2.6491	166.392	9.0422	6.8622	23.0751	58.6586	40.2097			JAM	7	α=1.0; HOS	1.03164	0.429912	0.754182	0.744497	0.876399	0.888711					JAM	7	Age0-5	α=1.0; HOS	0.373047	0.0704392	1.16584	1.24596	4.10872	2.13337	0.734328	0.141669	0.671869	0.10995	0.826851	0.797658	1.03164
	JOR	5	Age0-5	Current diet	112.801	58.2399	63.6807	37.25	8.4676	8.3947	116.701	1.8871	5.5707	12.6271	49.6161	60.5702			JOR	5	α=1.0; HOS	1.25363	0.744647	0.72991	0.904472	0.871633	1.06195					JOR	5	Age0-5	α=1.0; HOS	0.472677	0.233889	0.728659	2.36255	2.3529	0.898353	1.33725	3.77283	0.794012	0.342042	0.88359	0.864802	1.25363
	JPN	3	Age0-5	Current diet	97.1699	35.3027	83.8135	65.4846	12.8588	27.8607	267.7	19.3142	23.9759	14.3852	54.5376	37.3339			JPN	3	α=1.0; HOS	0.772595	0.756931	0.798777	0.76924	0.696611	0.62916					JPN	3	Age0-5	α=1.0; HOS	0.500861	0.931073	0.607475	1.87542	1.28253	0.878869	0.183828	0.0363308	0.857478	0.502364	0.890804	0.724111	0.772595
	KAZ	5	Age0-5	Current diet	86.8381	97.1712	101.529	67.3542	3.2639	10.39	581.637	1.2826	24.9535	6.4008	27.2976	47.0548			KAZ	5	α=1.0; HOS	1.1242	0.820546	1.00963	0.868747	0.794412	0.713103					KAZ	5	Age0-5	α=1.0; HOS	0.708068	0.149041	0.652309	1.96977	2.55326	0.291925	0.317741	4.52269	0.764302	0.404074	0.390302	0.766965	1.1242
	KEN	4	Age0-5	Current diet	141.385	86.4886	32.5266	40.9954	16.4691	2.4572	181.36	1.6176	8.3492	0.3011	10.4716	19.5832			KEN	4	α=1.0; HOS	1.98875	0.635063	4.87775	1.01594	0.671813	0.835375					KEN	4	Age0-5	α=1.0; HOS	0.415462	0.840315	1.61211	1.89508	0.67606	0.900008	0.619026	6.16382	0.900002	8.2089	0.900006	0.734252	1.98875
	KGZ	5	Age0-5	Current diet	126.181	90.2246	74.7363	31.6025	2.4712	5.6517	460.292	0.5355	13.9806	2.5121	20.2876	22.4862			KGZ	5	α=1.0; HOS	3.93201	2.42164	1.78327	1.67803	1.44607	1.9702					KGZ	5	Age0-5	α=1.0; HOS	0.262156	0.625878	1.40215	5.61782	8.47479	0.635756	0.119979	25.3761	0.786797	2.25059	0.873869	0.758243	3.93201
	KOR	3	Age0-5	Current diet	144.382	20.6694	195.431	84.1763	15.2462	15.9537	78.4279	22.5378	34.8784	11.3414	58.5098	66.9506			KOR	3	α=1.0; HOS	0.837683	0.956078	1.37287	1.52074	1.13107	0.848572					KOR	3	Age0-5	α=1.0; HOS	0.0897121	0.381816	0.0650223	1.12048	1.10101	0.896269	2.42879	0.195977	0.899998	1.09794	0.899261	0.875916	0.837683
	KWT	5	Age0-5	Current diet	119.939	37.3858	70.4018	248.127	7.4085	13.4175	53.8353	4.0211	11.0452	23.398	43.9299	57.7229			KWT	5	α=1.0; HOS	1.53989	1.23413	1.39543	1.54504	1.57495	1.24248					KWT	5	Age0-5	α=1.0; HOS	0.399126	0.899999	1.57452	0.122192	3.12649	0.899996	4.60162	4.13205	0.900002	0.0226387	0.9	0.899998	1.53989
	LAO	6	Age0-5	Current diet	227.755	43.7884	121.196	70.4824	10.2545	2.978	3.8854	6.2435	12.678	2.6571	12.3815	7.5987			LAO	6	α=1.0; HOS	8.14363	11.0341	19.2708	24.4348	21.1428	8.73301					LAO	6	Age0-5	α=1.0; HOS	0.244005	0.846562	0.212763	1.61488	1.37883	0.9	81.0178	1.34075	0.756184	8.00519	0.776481	0.630108	8.14363
	LCA	7	Age0-5	Current diet	96.8112	31.4192	23.3386	81.2753	7.4749	9.7031	23.9142	11.0311	11.9949	31.5404	64.865	26.0598			LCA	7	α=1.0; HOS	2.0105	1.53665	2.14408	2.03932	2.06505	1.50415					LCA	7	Age0-5	α=1.0; HOS	0.586702	0.473726	4.01178	0.976257	2.70862	0.898548	11.6979	0.0979775	0.792737	0.328236	0.876776	0.676743	2.0105
	LKA	6	Age0-5	Current diet	94.0461	18.2871	19.4614	73.4749	6.1744	3.2328	24.4533	11.025	0.812	2.5373	48.3291	10.5959			LKA	6	α=1.0; HOS	2.40972	2.05437	2.45675	2.70458	2.14042	1.5553					LKA	6	Age0-5	α=1.0; HOS	0.882443	4.21732	1.68883	0.00693706	3.22417	4.91067	11.4754	0.0608526	0.909729	0.0313719	0.858928	0.650016	2.40972
	LTU	1	Age0-5	Current diet	84.6975	77.9764	50.1075	33.8604	6.2005	15.0744	1176.38	9.8742	20.6213	8.9837	49.3835	55.7228			LTU	1	α=1.0; HOS	1.63823	1.23498	0.856693	0.804598	0.825058	1.34874					LTU	1	Age0-5	α=1.0; HOS	2.41657	0.238017	2.81852	7.38457	1.46969	0.900003	0.87376	0.173108	0.722699	0.89973	0.899999	0.86211	1.63823
	LUX	1	Age0-5	Current diet	91.3109	45.619	84.3715	200.076	0.8332	8.0949	1143.05	7.3992	31.5282	10.1887	44.3044	61.5226			LUX	1	α=1.0; HOS	2.74202	3.35616	2.17548	1.95915	2.52866	3.62337					LUX	1	Age0-5	α=1.0; HOS	0.845098	0.899998	1.13829	0.109931	22.4132	0.899999	0.732096	1.81647	0.876285	1.37829	0.900001	0.894593	2.74202
	LVA	1	Age0-5	Current diet	69.62	73.1157	51.7733	38.2868	3.1255	18.9264	478.56	6.1336	22.1058	9.5043	60.029	83.8792			LVA	1	α=1.0; HOS	1.52885	1.12664	0.946203	0.854899	0.964226	1.06135					LVA	1	Age0-5	α=1.0; HOS	1.48828	0.847714	1.93205	4.47234	2.37684	0.899997	0.366675	2.09922	0.870812	1.20695	0.900002	0.885354	1.52885
	MAR	5	Age0-5	Current diet	181.002	70.8841	56.2662	58.9765	6.1657	7.7028	126.905	3.7021	6.986	7.5036	48.4958	34.9525			MAR	5	α=1.0; HOS	1.32937	0.810273	0.871918	0.880432	0.860707	0.797935					MAR	5	Age0-5	α=1.0; HOS	0.169566	0.75085	1.74616	2.0299	4.69583	0.34812	1.16834	1.8322	0.698268	0.877805	0.892304	0.743143	1.32937
	MDA	1	Age0-5	Current diet	95.1286	46.2483	48.6212	29.9773	2.5219	12.5327	310.553	3.0824	9.3424	5.955	32.7228	42.346			MDA	1	α=1.0; HOS	1.95551	1.52724	0.996181	1.22058	1.20602	1.44923					MDA	1	Age0-5	α=1.0; HOS	0.839614	0.422301	2.39674	4.14656	5.37246	0.899998	0.0128738	4.44264	0.820357	2.32631	0.899996	0.886214	1.95551
	MDG	4	Age0-5	Current diet	174.74	147.975	14.9075	33.1149	3.9887	0.9657	54.8195	1.9414	6.3545	1.6273	4.7932	7.8466			MDG	4	α=1.0; HOS	3.10455	1.56151	2.638	2.30813	1.60854	1.76294					MDG	4	Age0-5	α=1.0; HOS	0.151514	0.363042	7.16913	3.75105	8.4319	0.899969	5.04036	7.51715	0.896719	1.40619	0.899983	0.727564	3.10455
	MDV	6	Age0-5	Current diet	166.482	22.7873	36.7156	92.6119	7.3952	11.1229	7.3169	65.2049	5.8033	6.1279	57.9789	23.5556			MDV	6	α=1.0; HOS	4.03793	3.78519	5.66422	3.52031	2.11177	3.25781					MDV	6	Age0-5	α=1.0; HOS	0.107566	2.73123	1.73573	0.129002	1.70546	0.221066	39.4113	0.813664	0.219565	0.102384	0.746949	0.531266	4.03793
	MEX	7	Age0-5	Current diet	224.554	19.5124	39.3602	93.1501	9.0997	25.016	205.708	3.9589	17.1915	13.448	58.1622	43.2836			MEX	7	α=1.0; HOS	1.40403	1.1225	1.23721	1.26826	1.05065	1.16001					MEX	7	Age0-5	α=1.0; HOS	0.271166	0.823979	3.01497	0.967093	2.7107	0.9	0.42437	4.26399	0.899991	0.779276	0.900002	0.892816	1.40403
	MKD	1	Age0-5	Current diet	81.8953	44.6832	89.7404	79.0852	11.2874	8.447	312.869	1.2762	8.391	7.2062	37.7982	53.5548			MKD	1	α=1.0; HOS	0.95105	0.527104	0.478733	0.677228	0.564781	0.713624					MKD	1	Age0-5	α=1.0; HOS	0.80408	0.9	0.508569	1.50091	0.582543	0.32569	0.0104846	4.86256	0.285568	0.563237	0.243811	0.825142	0.95105
	MLI	4	Age0-5	Current diet	263.922	35.9264	32.4383	15.9641	8.9524	0.8959	221.07	3.031	13.5623	1.4915	5.3026	25.3085			MLI	4	α=1.0; HOS	1.70419	0.656283	0.698308	1.45618	0.579945	0.853601					MLI	4	Age0-5	α=1.0; HOS	0.337295	0.025427	2.11452	11.2273	1.66588	0.655988	0.263697	2.21287	0.354969	0.000134093	0.891525	0.700607	1.70419
	MLT	1	Age0-5	Current diet	106.085	43.7197	147.933	101.946	6.6746	11.6628	324.3	8.8233	25.4207	10.2649	57.3434	54.2491			MLT	1	α=1.0; HOS	0.58236	0.950865	0.689865	0.556643	0.610196	0.585701					MLT	1	Age0-5	α=1.0; HOS	0.568301	0.525854	0.051078	0.476565	1.55031	0.430488	0.144766	0.202487	0.763268	0.873043	0.742321	0.65984	0.58236
	MNE	1	Age0-5	Current diet	91.8545	39.6204	95.2052	134.611	7.2243	8.7289	586.165	2.3259	24.6782	5.3328	50.284	39.2421			MNE	1	α=1.0; HOS	1.60311	0.964833	1.1237	0.817072	0.994098	1.1326					MNE	1	Age0-5	α=1.0; HOS	0.771779	0.587972	0.621026	0.577801	2.164	0.899999	0.490577	7.39279	0.899993	3.23367	0.879691	0.717959	1.60311
	MNG	5	Age0-5	Current diet	100.206	46.5338	25.076	25.0312	2.8982	2.2934	301.317	0.0906	34.9279	0.7911	12.8338	25.5523			MNG	5	α=1.0; HOS	14.2971	6.66255	5.40984	4.75541	7.94936	9.43713					MNG	5	Age0-5	α=1.0; HOS	0.625177	0.219254	4.78793	5.60973	5.36657	0.900017	0.0334034	136.543	0.887059	15.226	0.82744	0.53909	14.2971
	MOZ	4	Age0-5	Current diet	127.944	229.98	21.3721	10.9204	17.3588	1.6539	7.0267	3.0926	3.4201	0.8569	6.4313	24.6852			MOZ	4	α=1.0; HOS	8.45269	5.75402	7.27001	6.48948	4.55678	5.88306					MOZ	4	Age0-5	α=1.0; HOS	0.447798	0.9	6.74838	15.4202	0.517939	0.899994	41.9109	5.02606	0.899974	26.9236	0.900005	0.837498	8.45269
	MRT	4	Age0-5	Current diet	198.611	9.7416	18.255	9.7647	9.4893	2.2474	211.665	3.8457	12.0247	2.0383	20.0732	49.3442			MRT	4	α=1.0; HOS	1.33963	0.560119	1.04702	1.68993	0.758858	0.74748					MRT	4	Age0-5	α=1.0; HOS	0.022825	0.780991	1.20222	6.25292	1.70331	0.899973	0.641139	1.85953	0.899998	0.0573027	0.900001	0.855401	1.33963
	MUS	6	Age0-5	Current diet	223.318	25.4659	53.1741	38.6199	9.7946	7.0366	10.6007	9.196	6.5539	14.9465	15.2306	55.2016			MUS	6	α=1.0; HOS	3.19795	2.87175	3.42731	3.18	2.18057	2.51309					MUS	6	Age0-5	α=1.0; HOS	0.2876	0.720234	2.57104	4.32795	2.26323	0.899994	22.8374	1.26127	0.849937	0.60101	0.899997	0.85576	3.19795
	MWI	4	Age0-5	Current diet	166.224	196.053	17.3284	43.6177	25.5028	1.454	7.1169	1.767	3.8994	0.7319	5.2459	11.8727			MWI	4	α=1.0; HOS	4.46392	4.03905	5.32418	5.74964	3.03536	3.78408					MWI	4	Age0-5	α=1.0; HOS	0.0974079	0.9	1.69953	1.90075	0.154454	0.262448	45.0771	1.43299	0.47238	0.864599	0.612116	0.0932307	4.46392
	MYS	6	Age0-5	Current diet	175.144	16.7255	62.2163	64.8169	7.2621	20.8105	9.4294	23.8006	10.9745	26.7205	59.8381	52.1559			MYS	6	α=1.0; HOS	3.27001	3.2498	9.83159	11.9533	7.59452	3.27663					MYS	6	Age0-5	α=1.0; HOS	0.10098	0.246037	0.0783364	0.786085	1.36718	0.87453	32.2259	0.153731	0.798232	0.865006	0.889534	0.854611	3.27001
	NAM	4	Age0-5	Current diet	112.055	121.158	24.2647	20.9595	5.5804	1.8651	109.159	5.2041	12.299	5.4637	8.679	22.3798			NAM	4	α=1.0; HOS	2.12659	1.03386	1.32004	1.18172	1.26395	1.17443					NAM	4	Age0-5	α=1.0; HOS	0.220735	0.148741	4.76104	6.12476	3.53783	0.0258967	2.41537	2.96543	0.0151394	3.57694	0.9	0.827242	2.12659
	NER	4	Age0-5	Current diet	249.48	10.7523	39.7351	24.2919	53.3932	0.3208	156.215	0.7365	9.6062	0.5419	2.8499	16.9371			NER	4	α=1.0; HOS	6.21119	2.20294	2.22995	2.74847	2.10811	3.4126					NER	4	Age0-5	α=1.0; HOS	0.424165	0.53184	2.90455	5.10515	0.127428	0.899938	1.13398	17.9792	0.899992	42.7416	0.899996	0.88638	6.21119
	NGA	4	Age0-5	Current diet	170.687	229.279	48.7666	47.0309	20.6021	4.6564	6.9275	6.5586	4.7066	0.9056	5.3228	38.4976			NGA	4	α=1.0; HOS	6.51401	4.9408	6.29114	5.89404	4.41849	5.18017					NGA	4	Age0-5	α=1.0; HOS	0.013615	0.8785	1.46842	3.21226	0.200999	0.900009	43.2126	2.14648	0.89997	23.4353	0.900015	0.899999	6.51401
	NIC	7	Age0-5	Current diet	185.646	14.6101	11.0977	44.7646	18.548	6.2228	284.552	1.9813	5.4623	8.3455	50.2753	31.8011			NIC	7	α=1.0; HOS	1.72217	0.823407	1.06675	1.69123	0.912891	0.990562					NIC	7	Age0-5	α=1.0; HOS	0.0194117	0.899994	3.6036	2.42933	0.176019	0.899997	0.0641651	8.31182	0.633945	1.86714	0.882543	0.878073	1.72217
	NLD	1	Age0-5	Current diet	65.6268	69.1939	96.5151	186.359	4.9192	22.652	2152.21	6.221	23.1144	5.0905	44.6368	56.7496			NLD	1	α=1.0; HOS	1.18633	1.57546	1.06842	0.902809	1.01438	1.73364					NLD	1	Age0-5	α=1.0; HOS	1.48529	0.740567	1.05407	0.448296	3.52114	0.9	0.816416	2.31723	0.718928	0.899656	0.441286	0.893048	1.18633
	NOR	1	Age0-5	Current diet	92.0429	40.8876	55.8351	151.78	6.4463	10.7846	933.457	11.6154	21.302	7.0898	38.7757	94.2224			NOR	1	α=1.0; HOS	0.895723	0.848694	0.657487	0.548074	0.777549	0.892999					NOR	1	Age0-5	α=1.0; HOS	0.658292	0.846985	1.50301	0.356303	2.37842	0.900006	0.680807	0.14263	0.899991	0.730726	0.899999	0.751511	0.895723
	NPL	6	Age0-5	Current diet	235.702	81.2987	47.5121	14.9345	5.768	1.3881	115.528	0.7489	5.6698	0.684	13.9363	29.3011			NPL	6	α=1.0; HOS	1.45011	0.504721	0.509637	0.916182	0.941891	0.553815					NPL	6	Age0-5	α=1.0; HOS	0.342235	0.0866779	0.982621	7.95635	2.64527	0.0244939	1.70012	2.02377	0.696585	0.0195906	0.410116	0.513547	1.45011
	NZL	2	Age0-5	Current diet	64.915	35.114	82.3117	95.6273	8.6368	9.3425	1189.85	5.1688	41.7564	14.7322	52.0568	69.2053			NZL	2	α=1.0; HOS	0.999137	1.09902	0.698229	0.692903	0.778222	1.1979					NZL	2	Age0-5	α=1.0; HOS	1.51854	0.0109472	0.569947	1.01202	2.47218	0.892299	0.752126	1.90267	0.833858	0.236149	0.888931	0.899993	0.999137
	PAK	6	Age0-5	Current diet	226.637	17.1331	13.533	29.6092	3.6042	3.4834	416.431	0.7076	5.9591	2.2104	48.0633	46.2047			PAK	6	α=1.0; HOS	1.86328	0.577769	0.734128	0.770643	0.749118	0.711158					PAK	6	Age0-5	α=1.0; HOS	0.175758	1.75022	5.64506	2.78494	5.60357	0.749239	0.428754	2.10444	0.590911	0.899973	0.846251	0.780191	1.86328
	PAN	7	Age0-5	Current diet	148.654	25.7194	23.0729	73.717	6.3205	6.5664	122.942	5.0925	35.5588	13.2805	38.2982	44.0033			PAN	7	α=1.0; HOS	1.17235	1.06171	1.50894	1.40448	0.999798	1.20325					PAN	7	Age0-5	α=1.0; HOS	0.122268	0.957141	1.8087	1.43833	2.66294	0.817769	1.62714	1.23012	0.895781	0.801717	0.860393	0.845852	1.17235
	PER	7	Age0-5	Current diet	126.033	148.01	49.8203	94.9314	8.1962	10.9023	136.283	9.478	6.3738	5.245	27.6754	25.5317			PER	7	α=1.0; HOS	0.895403	0.68095	0.899569	0.88073	0.861301	0.718216					PER	7	Age0-5	α=1.0; HOS	0.384401	0.628392	0.569673	0.947452	1.18441	0.658191	1.53644	0.570753	0.574414	2.09672	0.844129	0.749856	0.895403
	PHL	6	Age0-5	Current diet	196.802	29.7369	63.3607	144.881	4.7145	6.4796	2.2503	14.3735	21.3595	7.888	32.3037	24.9509			PHL	6	α=1.0; HOS	12.247	16.4285	24.3772	12.813	30.7454	11.0523					PHL	6	Age0-5	α=1.0; HOS	0.260122	1.85323	0.0536263	0.557679	3.42569	0.0371937	139.543	0.0329356	0.50232	0.00010142	0.0872563	0.610463	12.247
	POL	1	Age0-5	Current diet	87.1935	89.2866	58.4439	50.2499	3.2962	11.4291	506	2.5113	26.4599	8.427	48.5665	60.8575			POL	1	α=1.0; HOS	1.58694	1.2282	0.894061	1.12377	1.22115	0.968375					POL	1	Age0-5	α=1.0; HOS	0.742929	0.876247	0.872926	2.11368	7.30599	0.662502	0.327331	1.92307	0.843344	1.83941	0.748481	0.787339	1.58694
	PRT	1	Age0-5	Current diet	90.2747	42.598	117.914	123.717	5.4243	8.9786	647.184	14.0976	27.4678	11.9309	28.1897	100.699			PRT	1	α=1.0; HOS	0.684034	0.64609	0.49342	0.361028	0.358183	0.557327					PRT	1	Age0-5	α=1.0; HOS	0.173611	1.86597	0.309777	0.607147	2.75075	0.115385	0.578557	0.0839292	0.427362	0.0365019	0.375701	0.883709	0.684034
	PRY	7	Age0-5	Current diet	92.3112	109.16	31.7978	62.9817	10.0885	26.8051	172.849	1.2544	23.7372	2.7839	30.3197	52.6981			PRY	7	α=1.0; HOS	1.08637	0.781241	0.655582	1.11548	1.46988	0.920919					PRY	7	Age0-5	α=1.0; HOS	0.272464	0.0193661	3.59183	2.17188	1.46568	0.893378	0.943183	1.57015	0.127728	0.899996	0.206087	0.87472	1.08637
	PSE	5	Age0-5	Current diet	98.7298	71.2866	359.878	184.723	11.6851	51.7251	610.843	3.0951	23.5768	5.1119	55.6431	37.5498			PSE	5	α=1.0; HOS	0.972783	0.79902	0.93002	0.838408	0.900631	0.907502					PSE	5	Age0-5	α=1.0; HOS	0.115132	0.590384	0.700207	0.306846	1.18084	0.899998	0.561489	4.45104	0.899995	0.899998	0.601259	0.466218	0.972783
	ROU	1	Age0-5	Current diet	110.844	77.2364	75.5184	63.9395	3.4657	15.3168	533.617	1.3283	17.3352	6.2038	26.5172	41.0866			ROU	1	α=1.0; HOS	1.56372	0.987442	0.966216	0.973955	1.19827	1.17721					ROU	1	Age0-5	α=1.0; HOS	0.473872	0.763815	0.595904	1.54804	6.52696	0.808406	0.406585	3.84883	0.749804	1.57807	0.77251	0.69188	1.56372
	RUS	1	Age0-5	Current diet	90.6254	85.3597	45.8409	54.2173	3.4742	17.5877	360.137	4.4773	19.3617	8.9623	54.5582	46.1624			RUS	1	α=1.0; HOS	1.51815	0.957671	0.897903	0.947994	1.05379	1.20892					RUS	1	Age0-5	α=1.0; HOS	0.881258	0.657858	2.52639	2.30751	4.66611	0.899998	0.007162	2.5623	0.808911	1.11657	0.9	0.883769	1.51815
	RWA	4	Age0-5	Current diet	57.4626	287.141	40.4038	116.252	27.6442	0.4728	40.885	0.6616	3.7269	0.1063	3.7669	11.4433			RWA	4	α=1.0; HOS	1.99422	1.00703	4.01383	2.45836	0.575076	1.21256					RWA	4	Age0-5	α=1.0; HOS	2.22984	0.538005	0.131183	0.533156	0.42465	0	6.92808	12.3628	0.514664	0	5.30941e-05	0.268218	1.99422
	SAU	5	Age0-5	Current diet	108.522	17.7169	40.2539	67.1694	5.3076	5.511	147.769	1.9873	5.4347	17.7656	39.2608	52.8561			SAU	5	α=1.0; HOS	1.88931	0.983981	1.08351	1.09638	1.1365	1.22065					SAU	5	Age0-5	α=1.0; HOS	0.51262	0.812416	2.58177	1.79418	4.8966	0.9	0.913817	7.25245	0.899994	0.347621	0.899999	0.860202	1.88931
	SDN	4	Age0-5	Current diet	155.699	13.4735	47.6584	43.8049	14.5788	0.9529	406.199	0.6554	12.4553	0.4659	13.8481	19.426			SDN	4	α=1.0; HOS	7.20459	1.99423	4.64309	2.53839	1.30218	3.19209					SDN	4	Age0-5	α=1.0; HOS	0.0326548	0.129818	2.17558	2.83647	1.20629	0.89999	0.281222	27.3578	0.848779	49.1095	0.900001	0.67701	7.20459
	SEN	4	Age0-5	Current diet	204.035	18.325	41.5179	14.3757	13.6259	2.4403	31.5837	10.84	6.2155	2.0329	9.0694	50.9116			SEN	4	α=1.0; HOS	1.56284	1.11616	1.19634	0.979946	1.32726	1.2852					SEN	4	Age0-5	α=1.0; HOS	0.0675134	0.18764	1.50943	5.5479	0.647759	0.114494	8.06346	0.183893	0.110611	0.777018	0.744162	0.800185	1.56284
	SLV	7	Age0-5	Current diet	177.465	26.3489	42.3663	65.9202	13.955	10.9986	151.243	2.2247	4.7008	8.1143	47.7759	25.9421			SLV	7	α=1.0; HOS	0.897578	0.421466	0.5929	0.846734	0.359961	0.507378					SLV	7	Age0-5	α=1.0; HOS	0.104001	0.72729	2.70335	2.43667	0.426478	0.0941211	1.02614	1.73583	0.0484598	0.0448468	0.569645	0.85409	0.897578
	SRB	1	Age0-5	Current diet	92.0454	30.2624	58.3039	92.0062	9.6582	8.0486	321.723	1.1012	14.824	4.2532	32.2147	21.7046			SRB	1	α=1.0; HOS	0.846826	0.729379	0.896507	0.684936	0.759427	0.639051					SRB	1	Age0-5	α=1.0; HOS	1.12876	0.899905	0.828842	0.245964	0.640326	0.360286	0.182765	2.14402	0.665212	1.40214	0.870935	0.792744	0.846826
	SUR	7	Age0-5	Current diet	137.45	32.1439	35.9404	78.2992	2.6991	2.1753	27.9217	5.6126	8.8098	16.7674	59.6581	41.1181			SUR	7	α=1.0; HOS	2.41734	0.842127	1.40198	0.985468	1.45778	1.5384					SUR	7	Age0-5	α=1.0; HOS	0.0262553	0.150088	3.20306	1.64128	1.64862	8.77644	9.64424	1.15086	0.672887	0.900002	0.505512	0.688845	2.41734
	SVK	1	Age0-5	Current diet	77.6178	40.9768	38.1114	46.3561	3.6245	14.0872	262.052	1.6405	16.5338	6.592	50.4232	55.2815			SVK	1	α=1.0; HOS	3.03958	1.95726	1.80964	1.95184	1.77413	2.48816					SVK	1	Age0-5	α=1.0; HOS	0.817756	0.9	3.62068	3.85117	9.02141	0.900001	0.32353	11.7032	0.899999	2.6723	0.899998	0.864971	3.03958
	SVN	1	Age0-5	Current diet	85.9157	41.6347	33.6674	105.172	5.7872	11.0214	433.281	2.288	24.0388	9.0715	28.6408	57.7809			SVN	1	α=1.0; HOS	1.61914	0.817588	0.773911	0.896669	0.912851	0.950633					SVN	1	Age0-5	α=1.0; HOS	0.706165	0.672607	1.65434	0.691911	4.04983	0.878146	0.0986379	7.71359	0.675084	0.888376	0.526193	0.87476	1.61914
	SWE	1	Age0-5	Current diet	73.3659	42.5366	70.3925	121.462	5.0745	11.3521	1099.54	7.0802	27.0112	6.4529	39.5021	119.489			SWE	1	α=1.0; HOS	0.788091	1.28371	0.703988	0.578139	0.841764	0.97949					SWE	1	Age0-5	α=1.0; HOS	1.18342	0.612538	0.0778236	0.146424	2.79697	0.86554	0.715171	0.00104517	0.748508	0.899781	0.546558	0.863315	0.788091
	SWZ	4	Age0-5	Current diet	155.263	51.2339	12.5572	51.9042	5.4345	2.41	67.6559	0.5789	8.8385	2.3983	17.8639	17.9419			SWZ	4	α=1.0; HOS	3.79121	1.22888	1.39545	1.92086	0.88692	1.04698					SWZ	4	Age0-5	α=1.0; HOS	0.021025	1.23409	5.27912	2.22148	2.75157	0.524564	3.83458	23.1461	0.299282	5.21007	0.3108	0.661842	3.79121
	THA	6	Age0-5	Current diet	167.852	21.7067	44.2202	159.315	7.8986	18.0031	66.2191	11.1543	13.2802	8.8895	71.6675	25.0796			THA	6	α=1.0; HOS	1.20253	1.31033	1.94774	2.14042	1.83012	1.14627					THA	6	Age0-5	α=1.0; HOS	0.0394187	0.298783	2.47703	0.218368	2.40758	0.899995	3.41233	0.64091	0.889565	1.35012	0.899999	0.896218	1.20253
	TJK	5	Age0-5	Current diet	112.306	32.154	83.8523	30.2749	3.4172	2.1584	133.383	0.0832	5.5535	1.3233	16.1611	26.3308			TJK	5	α=1.0; HOS	12.1868	5.74348	0.953481	3.72734	3.51305	8.52809					TJK	5	Age0-5	α=1.0; HOS	0.828665	0.328295	0.427337	2.93819	3.28629	4.38515	1.01349	131.232	0.207581	0.0780624	0.867695	0.648974	12.1868
	TTO	7	Age0-5	Current diet	114.934	57.0179	26.3986	96.4488	10.5656	3.9579	11.2679	6.746	8.5181	24.2809	68.5058	44.6057			TTO	7	α=1.0; HOS	3.51427	3.29728	3.84234	3.70644	3.10524	2.56735					TTO	7	Age0-5	α=1.0; HOS	0.434141	0.805408	4.74561	1.17636	1.76956	0.899997	27.1056	1.91373	0.826182	0.713812	0.9	0.880867	3.51427
	TUN	5	Age0-5	Current diet	149.144	46.7722	82.9431	62.9212	11.3034	8.4027	238.084	3.6145	5.5725	4.9988	45.574	52.254			TUN	5	α=1.0; HOS	1.63529	0.882471	0.988904	1.08168	1.02224	1.0156					TUN	5	Age0-5	α=1.0; HOS	0.118365	0.9	1.1342	2.70459	2.21338	0.899996	0.456969	4.70937	0.899973	3.78663	0.899998	0.899998	1.63529
	TUR	5	Age0-5	Current diet	123.68	80.7065	112.203	85.7814	15.0371	7.8423	410.41	2.0868	6.0101	7.1385	39.3183	73.6329			TUR	5	α=1.0; HOS	0.890139	0.450763	0.429235	0.458701	0.403459	0.493464					TUR	5	Age0-5	α=1.0; HOS	0.18898	0.261211	0.347697	1.32792	0.494903	0.159469	0.258877	5.1084	0.107885	0.896911	0.688361	0.841051	0.890139
	TZA	4	Age0-5	Current diet	122.525	142.492	35.8518	54.3172	29.909	0.8016	85.2998	2.1379	4.5411	1.0343	6.6684	21.7978			TZA	4	α=1.0; HOS	1.72412	1.17706	1.30418	1.54699	0.951463	1.2615					TZA	4	Age0-5	α=1.0; HOS	0.497572	0.846829	1.80983	1.79366	0.0996991	0.89995	2.59897	5.46817	0.89998	4.04138	0.899991	0.833396	1.72412
	UKR	1	Age0-5	Current diet	84.4333	107.747	66.6255	45.2388	3.1255	21.068	351.68	3.0217	11.7629	8.4307	52.1145	39.3339			UKR	1	α=1.0; HOS	1.94285	1.39808	1.1965	1.05302	1.187	1.67564					UKR	1	Age0-5	α=1.0; HOS	0.957314	0.9	1.73747	3.40247	6.14059	0.9	0.0346622	5.89665	0.836554	0.736273	0.900001	0.872217	1.94285
	URY	7	Age0-5	Current diet	160.296	66.9335	42.8965	90.6018	3.2217	18.843	764.377	2.1892	21.9785	10.7405	45.2777	30.0387			URY	7	α=1.0; HOS	1.46619	0.989194	0.98578	1.11387	1.12551	1.12618					URY	7	Age0-5	α=1.0; HOS	0.0154377	0.708228	1.24798	0.992719	5.36372	0.614711	0.5552	4.9662	0.776072	0.827187	0.74015	0.786632	1.46619
	USA	2	Age0-5	Current diet	73.0706	37.4029	73.627	97.3789	8.4447	13.8211	884.284	4.0671	26.4784	21.512	57.9887	92.6254			USA	2	α=1.0; HOS	0.58667	0.932859	0.375523	0.38448	0.390203	0.479264					USA	2	Age0-5	α=1.0; HOS	1.41374	0.881017	0.381435	0.17891	0.3355	0.000875473	0.681562	7.37626e-05	0.840617	0.887091	0.587811	0.851405	0.58667
	UZB	5	Age0-5	Current diet	135.84	49.7754	124.416	55.2826	1.6268	5.8163	299.121	0.1103	13.8409	0.6108	9.0192	29.5882			UZB	5	α=1.0; HOS	11.6531	8.00873	7.53344	8.04564	5.91729	12.3122					UZB	5	Age0-5	α=1.0; HOS	0.323862	0.0459504	0.387095	2.28524	7.83507	0.0801712	0.374647	125.729	0.567232	0.667813	0.890911	0.650323	11.6531
	VCT	7	Age0-5	Current diet	100.047	57.8571	49.9726	163.662	7.8351	8.3652	36.6372	6.6303	11.6316	33.1235	53.1062	31.5901			VCT	7	α=1.0; HOS	1.08458	0.782637	0.986094	1.24801	0.893446	0.863187					VCT	7	Age0-5	α=1.0; HOS	0.511259	1.06924	1.23552	0.109263	1.21649	0.837768	6.70595	0.0306924	0.0482995	0.288508	0.537576	0.424424	1.08458
	ZAF	4	Age0-5	Current diet	204.42	38.2694	30.2766	31.2136	4.1191	8.9843	117.349	2.3686	14.2569	15.9129	17.7875	39.294			ZAF	4	α=1.0; HOS	1.56743	1.52336	1.39968	1.0125	0.982859	1.44686					ZAF	4	Age0-5	α=1.0; HOS	0.215127	0.168876	3.87178	5.39092	4.65004	0.377336	1.53935	0.426919	0.488171	0.282626	0.586018	0.811992	1.56743
	ZWE	4	Age0-5	Current diet	174.623	18.4272	13.2582	13.2568	7.9081	2.3294	61.0231	1.1173	7.9006	3.1493	13.6542	35.2874			ZWE	4	α=1.0; HOS	3.39833	1.74684	2.30869	1.78338	1.91842	2.52563					ZWE	4	Age0-5	α=1.0; HOS	0.028084	0.668452	5.53167	6.44337	3.51221	0.900017	4.1384	10.5238	0.899982	6.59836	0.879861	0.655823	3.39833
	AGO	4	Age6-10	Current diet	261.408	636.583	44.0376	388.326	31.5103	3.7079	29.9283	21.5494	24.598	21.2381	27.1074	26.326			AGO	4	α=0.0; JFS	1.58016	0.872453	0.922077	1.11138	1.55085	1.16937					AGO	4	Age6-10	α=1.0; HOS	0.298048	0.9	3.97011	0.238665	0.386033	0.198765	7.96102	0.824519	0.551016	0.422552	0.822927	0.395164	1.41407
	ALB	1	Age6-10	Current diet	212.221	57.3352	220.362	187.49	15.0698	10.727	975.085	3.7903	41.6399	15.4115	151.509	23.8575			ALB	1	α=0.0; JFS	0.899711	0.524219	0.477947	0.4879	0.582673	0.345833					ALB	1	Age6-10	α=1.0; HOS	0.059858	0.0741953	0.163359	0.22266	1.27157	2.79668e-05	0.519249	0	0.53808	1.9466e-05	0.782661	0.295878	0.327296
	ARE	5	Age6-10	Current diet	243.508	27.9991	87.1619	129.49	78.8279	9.3745	47.8507	16.8178	19.6715	51.7607	108.095	43.8181			ARE	5	α=0.0; JFS	2.1137	2.11162	2.10225	1.52635	1.7616	1.46201					ARE	5	Age6-10	α=1.0; HOS	0.315298	0.491202	0.463031	0.210684	0.0161263	0.170452	6.86825	0.35488	0.33454	0.897337	0.651247	0.659917	0.952747
	ARG	7	Age6-10	Current diet	270.459	97.6416	112.833	128.48	3.347	28.8047	941.041	5.577	103.434	51.3293	132.398	47.7318			ARG	7	α=0.0; JFS	1.03271	0.668272	1.34363	1.64438	1.02619	0.355917					ARG	7	Age6-10	α=1.0; HOS	0.146689	0.317416	0.529815	0.517638	2.47983	0.742636	0.376075	0.855657	0.870687	0.52622	0.841774	0.834435	0.75324
	ARM	1	Age6-10	Current diet	188.115	62.397	215.112	106.699	2.6535	21.4331	603.575	1.9324	36.4074	17.3639	127.798	32.059			ARM	1	α=0.0; JFS	0.734776	0.914457	0.912165	0.871608	0.928033	0.660603					ARM	1	Age6-10	α=1.0; HOS	0.436638	0.9	0.322636	0.893474	4.20987	0.9	0.370828	10.4711	0.899998	0.603586	0.9	0.720175	1.80236
	ATG	7	Age6-10	Current diet	177.866	42.3318	110.373	299.11	6.4976	0	205.667	50.7131	41.3339	85.6094	85.9336	41.1505			ATG	7	α=0.0; JFS	1.17474	0.999977	1.16067	1.24739	0.935217	0.963488					ATG	7	Age6-10	α=1.0; HOS	0.0834273	0.823764	0.784728	0.147705	3.87434	#DIV/0!	0.910463	0.360211	0.400693	0.9	0.523213	0.474038	0.843871
	AUS	2	Age6-10	Current diet	111.774	58.3694	86.1449	104.644	16.0815	11.2737	1084.32	9.4286	82.2605	42.0239	125.464	80.8797			AUS	2	α=0.0; JFS	0.943025	0.86974	1.10128	0.933746	0.658959	0.96084					AUS	2	Age6-10	α=1.0; HOS	0.472049	0.626183	1.20823	1.30671	2.95907	0.899944	0.542146	0	0.77669	0.745626	0.673237	0.877361	0.923937
	AUT	1	Age6-10	Current diet	146.194	76.8885	99.1702	204.934	9.474	20.369	953.098	6.3625	78.8674	17.4731	132.702	139.077			AUT	1	α=0.0; JFS	0.915117	1.05219	0.959404	0.758887	0.475463	1.14219					AUT	1	Age6-10	α=1.0; HOS	0.412106	0.884888	1.57018	0.394963	3.12269	0.899995	0.530751	2.88025	0.898551	0.280219	0.88225	0.899999	1.13807
	AZE	1	Age6-10	Current diet	309.114	102.052	126.335	93.3658	3.2359	13.7167	459.823	1.535	29.4355	11.2046	51.9147	15.796			AZE	1	α=0.0; JFS	1.75198	0.985908	0.766305	0.480547	0.0949741	0.371071					AZE	1	Age6-10	α=1.0; HOS	0.154068	0.899999	1.25596	1.68838	3.02401	0.899998	0.167276	17.4705	0.889807	2.91464	0.838949	0.463415	2.55558
	BEL	1	Age6-10	Current diet	170.231	140.736	175.477	71.1857	7.8549	21.9114	956.495	12.1774	54.1942	21.2103	144.277	148.124			BEL	1	α=0.0; JFS	0.929664	0.868533	0.821711	0.74619	0.397002	0.684457					BEL	1	Age6-10	α=1.0; HOS	0.107501	0.9	0.42141	3.20732	5.64478	0.900002	0.520354	2.70058	0.9	0.892477	0.9	0.899998	1.49954
	BEN	4	Age6-10	Current diet	373.362	748.267	64.3224	63.0811	62.9198	1.6472	13.2401	16.1974	9.7171	16.9687	9.5868	22.5086			BEN	4	α=0.0; JFS	2.40415	0.849211	1.8853	1.95707	0.974729	1.75349					BEN	4	Age6-10	α=1.0; HOS	0.427837	0.892695	1.67166	1.78564	0.179486	0.36383	20.9938	0.945763	0.442354	1.30324	0.442066	0.540096	2.49904
	BFA	4	Age6-10	Current diet	660.125	31.7793	32.8531	11.3467	68.0086	5.6233	58.8646	9.1353	22.6665	3.3132	13.0251	18.7065			BFA	4	α=0.0; JFS	2.62911	2.5591	1.76906	2.47723	1.92235	1.58444					BFA	4	Age6-10	α=1.0; HOS	0.595727	0.66392	2.47397	5.90282	0.432647	0.900005	6.0541	2.36364	0.899989	0.489497	0.688563	0.394499	1.82162
	BGD	6	Age6-10	Current diet	368.763	85.6577	35.4881	40.1613	9.4218	2.9241	58.9001	18.1376	4.8174	2.0009	33.2697	17.5827			BGD	6	α=0.0; JFS	3.47242	1.8936	1.68234	4.53678	1.55387	3.65992					BGD	6	Age6-10	α=1.0; HOS	0.401594	0.878569	2.49245	3.84775	7.86244	0.880886	4.03291	0.159001	0.900008	23.4618	0.882088	0.618949	3.8682
	BGR	1	Age6-10	Current diet	229.096	43.7524	51.3155	59.0441	8.672	15.5628	491.524	3.7559	49.9012	26.0401	111.918	45.6732			BGR	1	α=0.0; JFS	1.78729	0.735089	0.847214	0.80709	0.694989	0.922965					BGR	1	Age6-10	α=1.0; HOS	0.122272	0.838183	2.90615	2.33234	8.63214	0.899999	0.226046	5.59986	0.899994	0.386861	0.9	0.899996	2.05365
	BHS	7	Age6-10	Current diet	158.536	68.561	156.948	419.674	2.603	17.7136	35.4881	23.7242	66.5598	80.8448	118.743	46.1622			BHS	7	α=0.0; JFS	3.07368	2.83339	3.41607	3.83768	1.98272	2.89246					BHS	7	Age6-10	α=1.0; HOS	0.397544	0.659181	0.37717	0.449942	13.3911	0.436569	9.32542	0.322434	0.897061	0.72774	0.9	0.549343	2.36946
	BIH	1	Age6-10	Current diet	248.358	103.398	130.33	117.863	15.4672	6.6508	520.231	3.4113	25.7239	16.4165	73.4782	27.5417			BIH	1	α=0.0; JFS	0.774614	0.739683	0.701588	0.669366	0.426377	0.735825					BIH	1	Age6-10	α=1.0; HOS	0.134833	0.898749	0.679187	1.21773	2.88324	0.899997	0.320919	13.8037	0.738931	0.213395	0.86755	0.57536	1.93613
	BLR	1	Age6-10	Current diet	159.243	256.772	103.366	81.8995	5.3147	31.2585	909.424	9.8915	73.4859	29.2629	135.42	67.0329			BLR	1	α=0.0; JFS	0.798023	0.686165	0.870323	0.758046	0.631987	0.602572					BLR	1	Age6-10	α=1.0; HOS	0.565593	0.886207	0.980227	1.5018	1.94203	0.843108	0.428964	2.1709	0.899894	0.433969	0.9	0.900001	1.03772
	BLZ	7	Age6-10	Current diet	298.664	30.0959	69.2759	318.32	41.5857	16.4488	46.2919	14.7573	30.4246	38.3138	117.113	39.1757			BLZ	7	α=0.0; JFS	1.785	1.56841	1.69283	1.93771	0.944423	1.18285					BLZ	7	Age6-10	α=1.0; HOS	0.29071	0.365555	2.05362	0.244294	0.278476	0.899999	7.72644	1.02118	0.894907	0.207518	0.868386	0.588485	1.28663
	BOL	7	Age6-10	Current diet	286.808	184.975	54.1652	115.538	21.1086	12.2882	161.895	1.6953	51.1645	54.0669	71.374	20.4727			BOL	7	α=0.0; JFS	0.863266	0.66698	0.856461	0.799112	1.15691	0.717046					BOL	7	Age6-10	α=1.0; HOS	0.234956	0.833016	2.59114	0.585542	1.01116	0.366075	1.41547	1.32407	0.722134	0.850241	0.543664	0.405047	0.906876
	BRA	7	Age6-10	Current diet	271.214	141.249	83.1298	233.679	51.706	19.9988	538.045	8.4923	78.5168	59.0737	119.381	56.6652			BRA	7	α=0.0; JFS	0.462834	0.355914	0.336078	0.375908	0.19551	0.293398					BRA	7	Age6-10	α=1.0; HOS	0.200563	0.859842	0.916408	0.132546	0.0023769	0.850786	0.236854	2.56676	0.875271	0.511509	0.839755	0.81399	0.733888
	BRB	7	Age6-10	Current diet	233.552	105.065	112.504	200.087	29.5072	16.1301	65.1745	37.5574	39.0535	72.5975	153.357	69.4249			BRB	7	α=0.0; JFS	1.07242	0.906916	1.22621	1.27978	0.82335	0.848475					BRB	7	Age6-10	α=1.0; HOS	0.137562	0.846139	0.587803	0.0858765	1.49337	0.765439	4.26468	0.270157	0.887759	0.899645	0.894327	0.66584	0.983217
	BRN	6	Age6-10	Current diet	289.434	48.4695	92.115	136.45	16.5228	33.8206	29.9	20.7601	29.4308	96.4761	185.524	48.8195			BRN	6	α=0.0; JFS	1.59512	1.5706	1.76992	2.41532	2.30077	1.66239					BRN	6	Age6-10	α=1.0; HOS	0.334128	0.385956	1.11509	0.51416	1.88148	0.881413	10.1749	0.0677213	0.781946	0.254996	0.896783	0.685271	1.49782
	BWA	4	Age6-10	Current diet	343.283	119.325	70.2537	67.3129	18.7662	4.0508	175.826	4.1315	48.4302	6.6107	50.865	35.4212			BWA	4	α=0.0; JFS	0.844829	0.801356	0.950395	0.88316	0.32137	0.746607					BWA	4	Age6-10	α=1.0; HOS	0.300196	0.838424	0.534992	0.58456	2.09936	0.205712	1.03723	3.80109	0.817114	0.688853	0.786983	0.571858	1.0222
	CAF	4	Age6-10	Current diet	187.73	666.589	35.1867	73.0029	27.6823	1.5962	52.4966	10.9009	60.2371	1.9011	16.1172	47.2015			CAF	4	α=0.0; JFS	1.38629	0.941332	1.17566	1.34407	2.25114	1.05632					CAF	4	Age6-10	α=1.0; HOS	0.266025	0.899997	1.91541	2.11882	0.297782	0.791505	5.97638	1.94735	0.878231	24.6937	0.803005	0.799314	3.44896
	CAN	2	Age6-10	Current diet	131.908	90.3212	88.6576	129.499	27.2716	18.5545	709.571	7.6919	48.5218	33.9415	132.46	119.102			CAN	2	α=0.0; JFS	0.826299	0.686983	0.752385	0.677666	0.390826	0.810101					CAN	2	Age6-10	α=1.0; HOS	0.414676	0.297375	0.904934	0.55284	1.32302	0.899997	0.443909	0.563151	0.887714	0.045546	0.888235	0.847385	0.672399
	CHE	1	Age6-10	Current diet	138.377	55.4264	96.3822	149.786	9.8392	15.3367	1158.41	7.9519	57.8943	14.8497	160.449	99.4655			CHE	1	α=0.0; JFS	0.875812	0.825183	0.853152	0.771697	0.521236	0.8257					CHE	1	Age6-10	α=1.0; HOS	0.490755	0.16149	1.4375	0.801455	2.83951	0.806503	0.553505	0.115771	0.843373	0.899937	0.843598	0.850734	0.887011
	CHL	7	Age6-10	Current diet	316.103	141.392	103.704	110.281	13.84	22.2333	393.371	13.5444	65.8732	52.5064	134.564	35.5271			CHL	7	α=0.0; JFS	0.749961	0.638704	0.757582	0.866447	0.32011	0.706159					CHL	7	Age6-10	α=1.0; HOS	0.421873	0.281836	0.74045	0.188049	2.06986	0.286075	0.0437838	0.251528	0.647773	0.23101	0.765484	0.600772	0.544041
	CHN	3	Age6-10	Current diet	276.608	128.651	489.688	160.978	21.0009	40.8952	137.831	26.9277	78.5096	20.3084	31.0023	27.4753			CHN	3	α=0.0; JFS	0.676214	0.856081	0.738451	0.675026	0.642537	0.827124					CHN	3	Age6-10	α=1.0; HOS	0.314802	0.582403	0.291799	0.185863	0.788519	0.895107	1.80911	0.123861	0.878693	0.697697	0.834348	0.0867288	0.624078
	CIV	4	Age6-10	Current diet	362.832	765.218	53.7133	118.893	19.9819	3.0082	5.5574	25.436	29.0446	2.4439	19.0484	35.5175			CIV	4	α=0.0; JFS	6.29589	2.72335	5.26161	4.00755	2.59246	4.81161					CIV	4	Age6-10	α=1.0; HOS	0.411497	0.885896	0.101437	0.137007	1.21545	0.0417525	72.1111	0.304022	0.61282	0.886861	0.849174	0.785083	6.52851
	CMR	4	Age6-10	Current diet	359.467	365.988	206.726	163.018	71.2127	0.7865	35.4891	24.3065	21.6643	4.5144	23.5142	28.3871			CMR	4	α=0.0; JFS	0.991313	0.813005	0.890631	0.944946	0.35639	0.986799					CMR	4	Age6-10	α=1.0; HOS	0.413319	0.9	0.106953	0.149139	0.0867149	0.0967578	8.7384	0.610475	0.874462	3.95561	0.899997	0.884095	1.47633
	COG	4	Age6-10	Current diet	212.907	657.556	21.6118	97.8334	15.6628	1.4424	2.3024	32.0686	33.4452	29.9655	24.4738	25.6606			COG	4	α=0.0; JFS	15.1752	8.55488	11.8631	12.7871	6.51774	11.2694					COG	4	Age6-10	α=1.0; HOS	0.0850372	0.899643	7.32204	1.05538	2.29509	0.899958	130.014	0.232049	0.84166	0.284727	0.874735	0.745193	12.1291
	COL	7	Age6-10	Current diet	217.616	151.819	63.5059	182.686	17.4238	24.5874	390.772	5.9707	39.0954	34.6872	147.723	45.3551			COL	7	α=0.0; JFS	0.877066	0.18585	0.554928	0.606413	0.269552	0.32404					COL	7	Age6-10	α=1.0; HOS	0.040872	0.832707	1.37042	0.0273612	2.18611	0.859635	0.00343576	2.24409	0.787024	0.678443	0.852143	0.782503	0.888729
	CPV	4	Age6-10	Current diet	380.381	89.7847	134.231	140.207	27.6453	9.6838	205.359	15.4277	40.169	23.64	36.2641	38.2552			CPV	4	α=0.0; JFS	0.635709	0.672958	0.78109	0.72006	0.219813	0.593274					CPV	4	Age6-10	α=1.0; HOS	0.390574	0.83495	0.229829	0.530444	0.937653	0.652141	0.715993	0.884409	0.79994	0.875127	0.861513	0.550174	0.688562
	CRI	7	Age6-10	Current diet	263.272	61.4213	74.6519	267.127	34.6563	20.1996	687.825	9.7062	41.5814	30.5431	150.065	54.9306			CRI	7	α=0.0; JFS	0.746961	0.617157	0.564235	0.567014	0.221061	0.630369					CRI	7	Age6-10	α=1.0; HOS	0.250075	0.0886517	0.866058	0.456163	0.660215	0.00286639	0.301231	0.000391502	0.324195	0.899977	0.727564	0.841121	0.451542
	CYP	1	Age6-10	Current diet	110.403	33.9365	96.9972	103.395	12.4927	11.9216	459.034	11.1999	52.0778	24.5637	86.4307	59.2373			CYP	1	α=0.0; JFS	0.907292	1.02307	0.85654	0.780922	0.707789	0.915178					CYP	1	Age6-10	α=1.0; HOS	0.840316	0.512398	0.998946	1.86788	1.09616	0.842387	0.171316	0.424504	0.835001	0.145784	0.8835	0.623958	0.770179
	CZE	1	Age6-10	Current diet	163.242	91.5342	52.2897	80.6811	10.4274	23.5854	583.416	5.2691	73.9696	27.5536	162.073	92.0729			CZE	1	α=0.0; JFS	1.45316	0.806903	0.909142	0.812532	0.627227	1.30646					CZE	1	Age6-10	α=1.0; HOS	0.0265636	0.899999	3.47523	2.37877	4.24937	0.872993	0.337104	4.58695	0.800626	0.0792528	0.881502	0.694141	1.60687
	DEU	1	Age6-10	Current diet	145.022	92.3562	86.7735	99.0593	8.925	19.1465	1207.32	6.0702	64.1388	16.2749	137.098	105.222			DEU	1	α=0.0; JFS	1.07678	1.14673	1.06064	0.878367	0.5035	0.920161					DEU	1	Age6-10	α=1.0; HOS	0.290071	0.347327	1.57627	1.85834	5.01706	0.861813	0.569761	2.4491	0.833655	0.899999	0.88284	0.886826	1.37275
	DJI	4	Age6-10	Current diet	520.862	32.7833	131.595	30.5686	40.5786	0	43.0202	2.5113	23.7888	1.0843	52.6413	40.0514			DJI	4	α=0.0; JFS	1.1764	1.36054	1.5014	1.68429	1.3587	1.326					DJI	4	Age6-10	α=1.0; HOS	0.506194	0.810663	0.0381466	3.37517	0.189386	#DIV/0!	9.89878	1.25533	0.826074	0.674998	0.887767	0.456279	1.71989
	DMA	7	Age6-10	Current diet	214.311	295.481	122.104	530.035	3.8569	0	354.735	25.8213	33.2153	44.6112	120.055	23.9894			DMA	7	α=0.0; JFS	1.36659	1.29973	1.58656	1.47367	0.490454	1.27738					DMA	7	Age6-10	α=1.0; HOS	0.176849	0.9	0.771963	0.305369	7.37556	#DIV/0!	0.112146	0.0974312	0.872044	0.233267	0.658348	0.501055	1.09128
	DNK	1	Age6-10	Current diet	184.699	79.5364	116.985	117.856	6.1542	21.2905	2128.22	11.7365	46.0726	23.7619	148.794	102.336			DNK	1	α=0.0; JFS	0.903857	1.02281	1.04609	0.711608	0.62491	1.16712					DNK	1	Age6-10	α=1.0; HOS	1.09142	1.00781	2.2619	2.88825	10.4775	0.899998	0.756631	3.47606	0.873213	0.869388	0.724338	0.883598	2.18417
	DOM	7	Age6-10	Current diet	215.798	66.1441	92.0365	358.495	27.9124	17.6893	170.516	7.6636	35.1231	41.4881	85.3499	58.7297			DOM	7	α=0.0; JFS	1.09054	1.03519	1.09827	1.08556	0.314531	1.03851					DOM	7	Age6-10	α=1.0; HOS	0.191053	0.692744	0.811676	0.00117156	0.817891	0.900002	1.29736	1.65755	0.848333	0.519621	0.865912	0.648437	0.770979
	DZA	5	Age6-10	Current diet	397.817	142.407	161.931	156.384	19.0936	13.0237	277.269	3.8252	22.5344	10.7028	93.4399	41.2003			DZA	5	α=0.0; JFS	1.63176	0.336763	0.460511	0.503832	0.111999	0.469325					DZA	5	Age6-10	α=1.0; HOS	0.492454	0.9	0.606729	0.720135	2.1403	0.0123851	0.0683364	0.00700617	0.26527	0.00602646	0.877655	0.525314	0.551801
	ECU	7	Age6-10	Current diet	227.65	46.2163	43.1101	276.796	7.9833	17.0568	711.693	6.0903	56.4505	32.1664	51.1764	61.5708			ECU	7	α=0.0; JFS	1.21775	1.08014	1.0421	1.32797	0.822675	1.34802					ECU	7	Age6-10	α=1.0; HOS	0.047603	0.709734	2.04278	0.253742	2.19124	0.899999	0.375123	1.50191	0.833821	0.303341	0.767616	0.799366	0.893856
	EGY	5	Age6-10	Current diet	498.32	84.3536	260.867	147.187	20.3628	5.905	267.338	17.6694	25.1326	17.119	115.601	21.4028			EGY	5	α=0.0; JFS	0.984752	0.243033	0.456967	0.295033	0.182592	0.429789					EGY	5	Age6-10	α=1.0; HOS	0.584506	0.850082	0.0678504	0.426858	3.19194	0.9	0.359309	0.976315	0.891364	0.47813	0.899999	0.899999	0.877196
	ESP	1	Age6-10	Current diet	116.006	82.4251	128.814	103.044	19.8491	21.9722	530.424	21.3407	68.9009	24.5336	68.4709	104.205			ESP	1	α=0.0; JFS	0.782686	0.804142	0.719641	0.662499	0.318432	0.802929					ESP	1	Age6-10	α=1.0; HOS	0.344065	0.741163	0.787173	1.75619	2.33786	0.899996	0.309573	0.479019	0.862424	0.148034	0.868275	0.790511	0.860357
	EST	1	Age6-10	Current diet	176.351	159.835	81.728	83.2421	11.6411	21.015	1137.88	7.2782	52.1506	25.0336	150.248	39.9287			EST	1	α=0.0; JFS	1.16371	0.621942	0.646078	0.503164	0.41986	0.540871					EST	1	Age6-10	α=1.0; HOS	0.223162	0.9	1.57512	1.90768	3.55905	0.899995	0.522837	4.46837	0.899999	0.452228	0.899999	0.859227	1.43064
	ETH	4	Age6-10	Current diet	454.18	143.55	33.0194	12.5724	44.9136	0.7771	117.509	0.2959	12.4138	0.8147	11.6887	9.4075			ETH	4	α=0.0; JFS	2.0946	0.978906	3.74739	2.96906	0.65628	0.435016					ETH	4	Age6-10	α=1.0; HOS	0.450669	0.899999	1.61163	3.25165	0.797899	0.0133831	1.9513	30.1372	0.900006	43.127	0.834541	0.515897	7.04094
	FIN	1	Age6-10	Current diet	150.339	88.9029	82.0012	105.49	5.3256	14.3805	1475.95	17.5691	53.6428	16.8056	87.3943	75.3236			FIN	1	α=0.0; JFS	1.04033	0.97938	0.928676	0.723061	0.62036	1.15263					FIN	1	Age6-10	α=1.0; HOS	0.118149	0.711366	1.58166	2.08689	6.16056	0.899997	0.628951	1.58596	0.736912	0.899938	0.638876	0.747783	1.39975
	FJI	2	Age6-10	Current diet	222.148	192.905	56.3945	147.872	29.571	9.3769	119.412	24.4898	35.7616	36.4178	147.404	61.1084			FJI	2	α=0.0; JFS	0.896411	0.949795	1.3247	1.48385	0.819175	0.908142					FJI	2	Age6-10	α=1.0; HOS	0.182307	0.872627	4.54655	0.666581	1.70092	0.899999	1.59588	0.674807	0.899999	0.269885	0.9	0.840539	1.17084
	FRA	1	Age6-10	Current diet	164.171	73.5198	98.6799	122.082	7.6519	19.5763	1283.56	17.865	70.3714	21.936	106.806	97.2558			FRA	1	α=0.0; JFS	0.909924	1.30825	0.986481	0.945375	0.596918	1.26953					FRA	1	Age6-10	α=1.0; HOS	0.116334	0.1373	1.49256	1.62786	4.47746	0.899996	0.599401	0.876406	0.881766	0.893394	0.890133	0.892164	1.14873
	GBR	1	Age6-10	Current diet	149.474	134.476	91.6219	140.35	8.6803	15.8252	699.678	8.4485	49.5658	28.5028	110.73	63.3066			GBR	1	α=0.0; JFS	1.08922	0.716911	0.4754	0.496219	0.576063	0.623382					GBR	1	Age6-10	α=1.0; HOS	0.479498	0.9	0.910525	0.581912	4.69887	0.894472	0.449371	1.87889	0.875791	0.0879072	0.879483	0.694043	1.1109
	GEO	1	Age6-10	Current diet	253.714	68.4691	42.7152	44.1765	6.9781	10.9124	419.062	5.1026	18.8165	14.8303	107.765	20.2297			GEO	1	α=0.0; JFS	1.17629	1.04306	0.889979	0.729131	1.32716	1.0895					GEO	1	Age6-10	α=1.0; HOS	0.0227102	0.828788	5.63049	4.83192	0.8722	0.887898	0.124125	3.87649	0.677687	2.20673	0.885102	0.691276	1.79462
	GHA	4	Age6-10	Current diet	293.707	1075.03	77.7112	263.981	20.8796	2.442	5.1323	38.6696	18.1335	10.59	20.1221	19.3641			GHA	4	α=0.0; JFS	7.17919	3.29039	5.19481	6.07071	3.32063	4.84277					GHA	4	Age6-10	α=1.0; HOS	0.466471	0.9	1.58323	0.192025	2.77381	0.9	90.8788	0.234187	0.864031	0.883607	0.899996	0.692131	8.43903
	GIN	4	Age6-10	Current diet	428.297	263.926	53.3781	158.782	20.7307	3.8456	36.0969	12.3278	11.7151	2.1222	25.9443	41.0921			GIN	4	α=0.0; JFS	1.49779	1.04639	1.23163	1.51634	0.619837	1.18102					GIN	4	Age6-10	α=1.0; HOS	0.463366	0.9	2.62604	0.407791	1.26658	0.89999	8.19629	2.53301	0.899992	16.8274	0.900001	0.881566	3.06684
	GMB	4	Age6-10	Current diet	646.399	16.6007	61.3399	16.9044	18.4604	0.7717	27.4435	35.9733	7.2238	5.9741	48.7303	48.899			GMB	4	α=0.0; JFS	3.26303	3.72662	5.48856	5.62226	1.08771	2.848					GMB	4	Age6-10	α=1.0; HOS	0.592815	0.899992	1.27307	10.6789	0.834874	0.899961	10.9235	0.4496	0.899983	6.65625	0.900001	0.862823	2.98932
	GNB	4	Age6-10	Current diet	457.985	171.092	37.6086	57.0353	14.2135	1.7846	43.6279	1.4833	22.4141	2.7939	21.8411	40.7789			GNB	4	α=0.0; JFS	1.32274	0.84507	1.33143	1.11541	3.57153	1.01932					GNB	4	Age6-10	α=1.0; HOS	0.420154	0.788097	0.868511	0.134473	1.13479	0.0381038	7.10487	1.32219	0.524523	1.11833	0.0493244	0.489533	1.16608
	GRC	1	Age6-10	Current diet	175.457	86.4204	212.921	172.801	16.4079	13.6868	984.96	9.7058	63.5547	13.4067	77.1046	91.4865			GRC	1	α=0.0; JFS	0.789854	0.742081	0.683135	0.709683	0.738915	0.814215					GRC	1	Age6-10	α=1.0; HOS	0.108126	0.894172	0.34267	0.440737	3.32825	0.900006	0.551025	3.21738	0.899996	0.693855	0.899999	0.872958	1.09576
	GRD	7	Age6-10	Current diet	183.498	64.7497	60.8336	201.866	26.0659	30.3084	39.3702	30.9169	24.8386	59.7997	111.186	41.3324			GRD	7	α=0.0; JFS	1.89244	1.59263	2.13759	2.24135	1.21248	1.77875					GRD	7	Age6-10	α=1.0; HOS	0.314359	0.225544	0.714985	0.0676558	1.10392	0.899998	9.02583	0.00903389	0.813669	0.899971	0.634196	0.148346	1.23813
	GUY	7	Age6-10	Current diet	348.047	64.3421	127.315	123.183	21.5516	2.7598	194.897	25.0551	9.6815	52.0727	114.907	13.8815			GUY	7	α=0.0; JFS	0.810396	0.696876	1.06707	0.850993	0.454537	0.892665					GUY	7	Age6-10	α=1.0; HOS	0.367904	0.836521	0.752298	0.527489	2.46345	0.899993	0.701544	0.347358	0.896638	0.380875	0.899999	0.200043	0.772843
	HND	7	Age6-10	Current diet	327.691	17.1795	88.6962	126.024	25.9809	9.5917	370.125	2.9849	20.289	33.6644	119.456	43.5021			HND	7	α=0.0; JFS	1.71231	0.459331	2.36323	1.357	0.298811	1.24217					HND	7	Age6-10	α=1.0; HOS	0.251864	0.655549	1.33563	0.720235	0.651794	0.899997	0.0923761	7.88412	0.9	0.0314487	0.9	0.802982	1.2605
	HRV	1	Age6-10	Current diet	163.008	58.8864	70.7499	141.402	6.7807	18.0468	646.227	12.2568	70.4492	11.6448	201.412	50.4792			HRV	1	α=0.0; JFS	1.12369	1.24462	1.19495	1.24842	1.21053	1.01496					HRV	1	Age6-10	α=1.0; HOS	0.305867	0.384398	1.05145	0.426243	6.04522	0.726583	0.339202	0.659405	0.829277	0.175512	0.9	0.733486	1.04805
	HTI	7	Age6-10	Current diet	218.746	222.348	32.9515	110.633	51.0849	1.1791	32.2024	5.1952	18.8313	11.2581	48.9574	31.1901			HTI	7	α=0.0; JFS	1.49293	2.92123	3.27223	3.84875	1.19411	1.17539					HTI	7	Age6-10	α=1.0; HOS	0.225975	0.830183	3.9066	1.45858	0.186854	0.899924	11.7389	2.62265	0.899996	0.239383	0.887465	0.0230329	1.9933
	HUN	1	Age6-10	Current diet	139.131	81.4751	57.137	92.1825	8.7767	24.3736	470.573	2.7896	58.3831	29.2802	120.873	105.922			HUN	1	α=0.0; JFS	2.60246	0.907369	0.959087	0.661497	0.665556	1.28545					HUN	1	Age6-10	α=1.0; HOS	0.183561	0.899999	3.73497	2.45145	5.74839	0.864181	0.0161707	2.81169	0.870868	0.66962	0.896857	0.805337	1.66276
	IDN	6	Age6-10	Current diet	447.022	124.681	70.1672	146.215	15.8219	9.7147	24.316	25.5287	11.0446	11.1065	56.4775	30.4005			IDN	6	α=0.0; JFS	1.40612	1.89451	1.92788	2.27563	1.63827	1.46347					IDN	6	Age6-10	α=1.0; HOS	0.510491	0.818535	0.959139	0.319182	2.97595	0.34281	12.2082	0.313099	0.496559	0.545068	0.864647	0.699196	1.75441
	IND	6	Age6-10	Current diet	320.456	58.0913	108.884	93.8982	28.7588	4.6194	264.769	4.8837	3.7763	2.6807	93.92	26.1924			IND	6	α=0.0; JFS	1.73762	0.693528	0.971001	0.712913	0.323498	0.601456					IND	6	Age6-10	α=1.0; HOS	0.276476	1.83657	1.86456	2.90897	1.85464	0.899987	0.751253	3.3724	0.370415	0.899989	0.87168	0.80573	1.39272
	IRL	1	Age6-10	Current diet	168.501	123.03	132.162	181.636	8.7714	14.223	2339.44	10.8616	57.0258	20.1367	130.674	86.3577			IRL	1	α=0.0; JFS	1.13273	1.17887	0.829878	0.718329	0.786358	1.55437					IRL	1	Age6-10	α=1.0; HOS	2.80622	0.298008	1.61949	1.50054	5.57454	0.9	0.778553	3.83661	0.874823	0.899999	0.686113	0.888817	1.72198
	IRN	6	Age6-10	Current diet	297.796	139.088	280.286	212.098	31.3053	11.6297	227.191	6.9947	16.1509	37.9214	98.6135	40.0542			IRN	6	α=0.0; JFS	0.821737	0.435862	0.573995	0.417629	0.164405	0.372859					IRN	6	Age6-10	α=1.0; HOS	0.343644	0.9	0.0788066	0.087318	1.17939	0.900006	0.569042	0.128969	0.755611	0.10887	0.897288	0.628251	0.5481
	IRQ	5	Age6-10	Current diet	291.37	28.9755	158.768	53.323	7.4119	15.5043	40.2311	2.5117	7.7639	21.1397	62.0832	46.5425			IRQ	5	α=0.0; JFS	2.41104	1.65858	1.94844	2.27518	2.78619	1.80809					IRQ	5	Age6-10	α=1.0; HOS	0.444289	0.899998	0.513727	2.27186	6.53375	0.0872984	7.09842	0.0412072	0.0459949	0.0443289	0.342977	0.398588	1.5602
	ISL	1	Age6-10	Current diet	102.431	81.5286	72.2431	144.246	3.7325	12.9917	938.493	42.8218	66.637	22.9898	126.029	72.3399			ISL	1	α=0.0; JFS	1.70967	1.3119	1.2826	1.30381	0.80335	1.41459					ISL	1	Age6-10	α=1.0; HOS	0.70819	0.549396	1.6541	0.379785	12.098	0.000107761	0.5707	0.261635	0.792609	0.899999	0.674572	0.665203	1.60453
	ISR	5	Age6-10	Current diet	289.313	83.9117	191.903	154.849	34.6639	22.5661	647.62	15.9316	49.9125	101.91	123.242	74.398			ISR	5	α=0.0; JFS	0.805691	0.607656	0.585143	0.603129	0.267629	0.595364					ISR	5	Age6-10	α=1.0; HOS	0.351058	0.636346	0.255405	0.329071	0.178439	0.603334	0.300125	0.588102	0.882985	0.831001	0.858155	0.752321	0.547195
	ITA	1	Age6-10	Current diet	202.944	50.8839	166.034	166.077	13.3422	18.1439	781.794	13.0213	66.7485	16.5852	84.3316	107.918			ITA	1	α=0.0; JFS	0.529054	0.530111	0.547279	0.495991	0.381018	0.472842					ITA	1	Age6-10	α=1.0; HOS	0.00591345	0.427188	0.0582464	0.769954	2.25577	0.609086	0.53098	0.00796387	0.78312	0.50047	0.817514	0.858251	0.635371
	JAM	7	Age6-10	Current diet	236.753	168.248	150.632	188.148	12.5164	4.228	248.762	23.7057	21.8406	73.4419	131.79	35.3813			JAM	7	α=0.0; JFS	0.954175	0.749086	1.39932	0.860817	0.993372	0.752921					JAM	7	Age6-10	α=1.0; HOS	0.499308	0.734407	1.1872	0.812762	5.11995	2.36518e-05	0.27322	0.0359449	0.0139099	0.691039	0.688843	0.607928	0.888711
	JOR	5	Age6-10	Current diet	262.161	84.4538	167.641	81.5388	22.8911	14.858	176.625	6.1242	21.5335	48.809	137.011	60.3133			JOR	5	α=0.0; JFS	0.926019	0.707273	0.79296	0.679113	0.553925	0.689784					JOR	5	Age6-10	α=1.0; HOS	0.28335	0.900001	0.968882	2.47847	1.9593	0.898344	0.904341	1.05147	0.793011	0.899396	0.88173	0.725105	1.06195
	JPN	3	Age6-10	Current diet	184.112	56.4695	142.091	95.3344	23.7356	42.5029	292.419	42.8196	53.7352	32.2406	146.478	42.76			JPN	3	α=0.0; JFS	0.876095	0.588865	0.786894	0.690364	0.465073	0.572272					JPN	3	Age6-10	α=1.0; HOS	0.0640273	0.647564	0.528073	0.654274	1.72918	0.9	0.251123	0.138857	0.85474	0.245023	0.810464	0.726597	0.62916
	KAZ	5	Age6-10	Current diet	201.161	176.923	176.4	105.034	4.9987	16.8056	899.591	3.5216	76.3063	19.5732	95.1954	54.4885			KAZ	5	α=0.0; JFS	0.923327	0.513186	0.618506	0.508335	0.425836	0.466947					KAZ	5	Age6-10	α=1.0; HOS	0.320473	0.894472	0.412421	1.60285	0.594915	0.540849	0.447645	0.578345	0.804484	0.686439	0.884428	0.789923	0.713103
	KEN	4	Age6-10	Current diet	361.739	167.247	78.5044	90.3601	49.3292	3.8953	258.381	5.0783	22.7226	0.8193	33.1279	18.821			KEN	4	α=0.0; JFS	0.343411	0.310856	1.94653	0.553041	0.0568609	0.260327					KEN	4	Age6-10	α=1.0; HOS	0.281107	0.894427	0.678535	0.373527	0.282066	0.900008	0.419625	1.59032	0.899994	2.22031	0.899997	0.584586	0.835375
	KGZ	5	Age6-10	Current diet	295.17	166.647	131.966	49.8316	5.0695	9.2404	720.16	1.4982	43.6816	7.8489	72.5817	24.4852			KGZ	5	α=0.0; JFS	1.37506	1.06462	1.06781	1.02883	0.561051	1.16877					KGZ	5	Age6-10	α=1.0; HOS	0.224097	0.9	0.473941	3.29514	7.79848	0.899994	0.416713	5.85423	0.857446	1.89474	0.9	0.127644	1.9702
	KOR	3	Age6-10	Current diet	276.754	32.9305	333.178	122.832	27.4967	24.4631	85.735	50.3587	78.926	25.6645	158.368	68.2116			KOR	3	α=0.0; JFS	1.51725	0.93991	1.96498	1.23336	1.0763	1.75773					KOR	3	Age6-10	α=1.0; HOS	0.336957	0.647239	0.0480779	0.94223	2.07039	0.882153	2.35675	0.0906378	0.900001	0.172464	0.892822	0.843137	0.848572
	KWT	5	Age6-10	Current diet	295.175	53.9536	197.349	554.924	18.9887	24.1808	82.709	13.4014	43.933	93.067	124.062	58.4339			KWT	5	α=0.0; JFS	1.23899	1.09982	0.940191	1.35215	0.828746	0.898775					KWT	5	Age6-10	α=1.0; HOS	0.265431	0.899999	0.64502	0.520736	2.66799	0.899999	2.90553	2.89115	0.9	0.513936	0.899999	0.899996	1.24248
	LAO	6	Age6-10	Current diet	439.093	91.1769	206.896	103.119	17.1631	4.5608	4.2493	13.965	28.6845	6.0119	33.4778	7.5293			LAO	6	α=0.0; JFS	7.40029	8.65635	11.2615	17.0839	14.6588	7.53765					LAO	6	Age6-10	α=1.0; HOS	0.413074	0.597021	0.132537	1.16203	1.04865	0.464721	94.1798	0.950319	0.823427	3.74228	0.783074	0.499196	8.73301
	LCA	7	Age6-10	Current diet	229.579	61.6043	48.6455	150.105	21.3594	15.3865	35.8588	28.8998	37.6526	99.0083	144.711	21.8711			LCA	7	α=0.0; JFS	1.9915	1.51675	2.3584	2.54345	1.71728	1.60546					LCA	7	Age6-10	α=1.0; HOS	0.0303177	0.670911	1.53986	0.441166	1.86664	0.898541	9.16591	0.558166	0.794386	0.755183	0.880026	0.448738	1.50415
	LKA	6	Age6-10	Current diet	259.018	40.2805	57.4276	146.498	20.4607	5.0883	33.1575	31.0266	2.3242	7.2629	124.235	8.5867			LKA	6	α=0.0; JFS	2.41588	2.08819	2.40006	2.4016	1.91748	1.64324					LKA	6	Age6-10	α=1.0; HOS	0.171342	0.413081	0.208645	0.354268	2.50264	1.67052	11.477	0.00679417	0.281516	0.105178	0.857921	0.614753	1.5553
	LTU	1	Age6-10	Current diet	195.957	140.504	86.02	52.6602	14.0171	24.3338	1401.82	26.872	62.6868	27.3094	171.334	64.5087			LTU	1	α=0.0; JFS	1.68587	1.0644	0.959211	0.75825	0.774001	1.02366					LTU	1	Age6-10	α=1.0; HOS	0.0175038	0.136584	3.2745	7.59873	0.476161	0.899995	0.775321	0.120132	0.869969	0.215984	0.9	0.899996	1.34874
	LUX	1	Age6-10	Current diet	167.118	83.1304	105.069	212.084	1.4151	13.0677	1165.49	13.8578	70.9692	22.9347	125.923	63.3253			LUX	1	α=0.0; JFS	2.4794	2.59348	2.00292	1.80728	1.29848	1.87657					LUX	1	Age6-10	α=1.0; HOS	0.224118	0.899999	1.8878	0.370077	32.9148	0.89999	0.599987	2.79088	0.899999	0.217465	0.9	0.875239	3.62337
	LVA	1	Age6-10	Current diet	157.364	128.121	85.9704	58.1895	4.3118	29.635	722.065	16.0209	64.0407	27.534	198.1	112.849			LVA	1	α=0.0; JFS	0.958187	0.839706	0.889542	0.676432	0.814793	0.638726					LVA	1	Age6-10	α=1.0; HOS	0.621809	0.9	1.52356	2.42123	1.77404	0.9	0.449017	1.13638	0.897734	0.388164	0.9	0.824281	1.06135
	MAR	5	Age6-10	Current diet	447.697	102.046	154.861	128.932	17.8322	13.6096	192.819	11.9908	26.8798	28.8713	133.643	35.6988			MAR	5	α=0.0; JFS	0.894966	0.654983	0.814071	0.807846	0.278496	0.776311					MAR	5	Age6-10	α=1.0; HOS	0.484201	0.722947	0.539926	0.250336	1.80715	0.365426	1.18848	1.37012	0.383139	0.899814	0.887801	0.675894	0.797935
	MDA	1	Age6-10	Current diet	218.084	83.1595	83.5935	46.5356	4.5406	20.3307	479.752	8.4128	28.3913	18.0973	111.491	47.2781			MDA	1	α=0.0; JFS	0.989372	0.947491	0.864337	0.893565	0.936523	0.794604					MDA	1	Age6-10	α=1.0; HOS	0.206205	0.755073	1.58306	1.62701	3.7096	0.868937	0.205988	5.15291	0.837464	0.706122	0.899999	0.838365	1.44923
	MDG	4	Age6-10	Current diet	461.88	380.048	36.2709	73.4622	12.0811	1.5375	78.2891	6.1531	17.683	4.5284	15.4115	7.4838			MDG	4	α=0.0; JFS	1.85576	0.995352	3.0429	2.78716	2.50889	0.934176					MDG	4	Age6-10	α=1.0; HOS	0.486911	0.89229	2.10953	0.642691	5.08135	0.524878	3.73843	1.69069	0.837793	3.05324	0.836012	1.26142	1.76294
	MDV	6	Age6-10	Current diet	276.333	46.805	109.458	188.517	12.115	17.7713	10.0403	189.2	17.131	18.0895	141.521	21.6161			MDV	6	α=0.0; JFS	3.89693	2.86792	3.07337	3.63985	1.86432	3.4515					MDV	6	Age6-10	α=1.0; HOS	0.305304	0.158979	0.216194	0.000243479	1.7483	0.101957	33.8461	0.82648	0.642169	0.271561	0.717206	0.259173	3.25781
	MEX	7	Age6-10	Current diet	384.94	31.1849	83.949	174.903	23.8683	40.4289	309.837	10.5359	55.5473	43.4518	132.53	41.183			MEX	7	α=0.0; JFS	0.826096	0.633606	0.729837	0.72998	0.580126	0.557424					MEX	7	Age6-10	α=1.0; HOS	0.516201	0.8226	1.75131	0.469414	2.51247	0.9	0.145075	3.98612	0.899995	0.131928	0.9	0.885045	1.16001
	MKD	1	Age6-10	Current diet	186.242	79.7204	149.645	122.792	23.655	13.5804	478.02	3.5114	25.2995	21.7273	130.558	61.4899			MKD	1	α=0.0; JFS	0.61871	0.592133	0.67778	0.705006	0.657387	0.692047					MKD	1	Age6-10	α=1.0; HOS	0.233625	0.899999	0.507449	0.598412	1.07193	0.216319	0.27264	1.59848	0.74741	0.756933	0.843684	0.816604	0.713624
	MLI	4	Age6-10	Current diet	697.548	71.8223	80.2159	35.9566	27.0953	1.4398	318.637	9.7992	37.4462	4.118	17.3501	25.0088			MLI	4	α=0.0; JFS	1.39433	0.96248	1.00146	1.20259	0.843017	0.715537					MLI	4	Age6-10	α=1.0; HOS	0.601441	0.256532	0.182827	1.22705	0.268622	0.000486179	0.396163	0.104529	0.668565	4.99556	0.891315	0.650123	0.853601
	MLT	1	Age6-10	Current diet	201.937	80.2529	184.395	108.401	11.2919	18.9652	330.115	16.6577	57.3515	23.1586	164.373	52.5563			MLT	1	α=0.0; JFS	0.770269	0.810131	0.818324	0.955567	0.348967	0.852866					MLT	1	Age6-10	α=1.0; HOS	0.0540846	0.66857	0.124272	0.296011	1.1157	0.640304	0.0609414	1.2162	0.669548	0.894553	0.835869	0.452361	0.585701
	MNE	1	Age6-10	Current diet	201.965	67.83	161.247	207.759	15.7735	13.8801	894.511	6.2909	74.2391	16.0425	171.503	45.5642			MNE	1	α=0.0; JFS	0.71564	0.724162	0.732512	0.760113	0.548502	0.743915					MNE	1	Age6-10	α=1.0; HOS	0.0699494	0.766089	0.537857	0.185085	2.22628	0.899994	0.512455	4.62422	0.899999	1.0746	0.9	0.894626	1.1326
	MNG	5	Age6-10	Current diet	232.166	86.4415	43.8797	39.3071	4.7286	3.7191	470.334	0.2502	107.211	2.4282	45.3604	28.7229			MNG	5	α=0.0; JFS	2.11073	2.72249	1.64525	2.73294	2.63929	0.951345					MNG	5	Age6-10	α=1.0; HOS	0.0436024	0.899999	3.00922	4.53368	6.81836	0.900003	0.240046	85.7866	0.9	8.75023	0.899999	0.463849	9.43713
	MOZ	4	Age6-10	Current diet	336.427	603.731	52.632	24.5589	48.5579	2.6544	10.1052	9.9687	9.6065	2.4068	20.9262	23.8863			MOZ	4	α=0.0; JFS	5.30703	1.77393	1.44559	1.9068	3.6211	3.18918					MOZ	4	Age6-10	α=1.0; HOS	0.343261	0.9	4.51494	7.5349	0.344922	0.900015	32.0424	3.78753	0.899995	17.5287	0.899996	0.899993	5.88306
	MRT	4	Age6-10	Current diet	508.66	18.0381	44.8863	21.8857	31.8189	3.6011	305.412	12.3712	34.5621	5.8585	64.7858	48.5016			MRT	4	α=0.0; JFS	0.938046	0.561436	0.607622	1.17163	0.307153	0.452228					MRT	4	Age6-10	α=1.0; HOS	0.492213	0.152078	0.601611	1.61246	0.809635	0.608036	0.108586	0.974158	0.899992	1.22417	0.894076	0.592735	0.74748
	MUS	6	Age6-10	Current diet	545.484	44.4353	124.233	82.9635	23.9095	10.9725	15.0188	27.9366	19.8964	45.3744	46.6809	57.2705			MUS	6	α=0.0; JFS	2.74687	1.89358	1.89188	2.18644	1.215	2.37776					MUS	6	Age6-10	α=1.0; HOS	0.583885	0.84328	0.920108	1.50373	1.81898	0.900005	20.2163	0.746909	0.899997	0.00454882	0.886523	0.832785	2.51309
	MWI	4	Age6-10	Current diet	422.75	418.681	42.1086	96.6472	65.2138	2.3131	10.1633	5.5848	10.6954	2.0075	16.7579	11.5753			MWI	4	α=0.0; JFS	3.77193	2.03561	4.23516	4.20012	2.47341	2.72615					MWI	4	Age6-10	α=1.0; HOS	0.492697	0.9	2.89765	1.14261	0.0846569	0.501016	35.7378	0.933892	0.614236	0.989539	0.899999	0.214854	3.78408
	MYS	6	Age6-10	Current diet	327.597	27.7456	105.068	94.1604	11.9021	31.6778	10.2949	52.5182	24.5079	59.6716	159.779	50.5918			MYS	6	α=0.0; JFS	3.38338	3.54422	4.55241	5.9021	5.11116	3.81418					MYS	6	Age6-10	α=1.0; HOS	0.305373	0.864501	0.218693	0.37442	5.41998	0.874527	27.8815	0.123199	0.820437	0.847078	0.887441	0.702424	3.27663
	NAM	4	Age6-10	Current diet	291.089	321.925	59.6116	47.0096	18.4076	2.9877	156.692	16.6954	36.1394	16.0544	28.062	22.5588			NAM	4	α=0.0; JFS	2.25598	0.504261	1.35458	0.542031	1.19669	0.527122					NAM	4	Age6-10	α=1.0; HOS	0.269687	0.594856	1.84407	2.91916	2.55509	0.687686	1.36439	0.591486	0.861121	0.722219	0.897295	0.786048	1.17443
	NER	4	Age6-10	Current diet	669.361	24.9132	98.3432	54.8423	128.915	0.5162	225.076	2.3844	26.1773	1.4766	9.2735	16.9618			NER	4	α=0.0; JFS	1.71249	0.0547984	0.29131	1.17154	0.0495638	0.983449					NER	4	Age6-10	α=1.0; HOS	0.720865	0.900001	1.24679	1.337	0.118952	0.900039	0.288143	9.4737	0.900001	23.3761	0.900005	0.789574	3.4126
	NGA	4	Age6-10	Current diet	446.67	624.931	119.849	105.553	46.4168	7.4629	9.9638	21.0686	13.0759	2.516	17.262	36.1386			NGA	4	α=0.0; JFS	4.26626	3.45161	4.2401	3.82449	2.39304	3.78188					NGA	4	Age6-10	α=1.0; HOS	0.520821	0.9	0.843717	1.01532	0.105218	0.899999	39.0223	1.4751	0.899992	14.6795	0.9	0.899999	5.18017
	NIC	7	Age6-10	Current diet	355.91	29.8102	23.7411	84.4007	52.5173	10.1131	431.251	5.2802	17.8619	27.2897	114.969	28.8936			NIC	7	α=0.0; JFS	1.01687	0.355711	0.94543	1.47873	0.16467	0.322142					NIC	7	Age6-10	α=1.0; HOS	0.351824	0.54686	1.84004	1.34399	0.166958	0.899971	0.082479	4.17825	0.88981	0.0723277	0.882573	0.631655	0.990562
	NLD	1	Age6-10	Current diet	118.169	125.86	120.828	197.109	8.5196	36.5348	2195.75	11.6717	51.7689	11.4011	126.527	54.2484			NLD	1	α=0.0; JFS	0.864537	0.934026	0.82598	0.580888	0.745652	1.11386					NLD	1	Age6-10	α=1.0; HOS	2.2244	0.592009	2.15896	1.24385	6.12859	0.899999	0.742852	3.46781	0.86975	0.899615	0.675826	0.900001	1.73364
	NOR	1	Age6-10	Current diet	163.81	74.4763	69.8166	161.193	10.6284	17.5306	950.306	21.8152	47.8483	15.925	110.346	95.4113			NOR	1	α=0.0; JFS	0.789627	0.639679	0.5767	0.572491	0.322033	0.604673					NOR	1	Age6-10	α=1.0; HOS	0.096199	0.868044	1.2995	0.287277	4.07661	0.899998	0.473906	0.0956306	0.899996	0.250851	0.688823	0.779162	0.892999
	NPL	6	Age6-10	Current diet	418.205	147.525	140.19	29.7328	20.3538	2.1843	156.665	2.1069	16.2292	1.9578	32.3168	28.6389			NPL	6	α=0.0; JFS	1.0086	0.209657	0.276068	1.28229	0.680815	0.268537					NPL	6	Age6-10	α=1.0; HOS	0.338295	0.299114	0.0694116	1.46156	0.0981094	0.322804	1.19795	0.862357	0.639797	0.000204311	0.775761	0.58041	0.553815
	NZL	2	Age6-10	Current diet	118.751	64.8957	103.211	102.008	14.2519	15.2029	1211.67	9.6958	94.1901	33.2315	148.103	69.6013			NZL	2	α=0.0; JFS	1.08026	1.12102	1.00594	0.92973	0.675744	1.12412					NZL	2	Age6-10	α=1.0; HOS	0.79221	0.591041	1.36111	1.71576	1.02679	0.877319	0.582013	3.91195	0.86658	0.899998	0.857938	0.89214	1.1979
	PAK	6	Age6-10	Current diet	336.426	32.8281	41.0239	60.0939	12.8864	5.5552	570.809	2.0436	17.5021	6.4918	112.567	39.3434			PAK	6	α=0.0; JFS	2.33223	0.22848	0.310373	0.461352	0.315815	0.9611					PAK	6	Age6-10	α=1.0; HOS	0.244059	0.462537	1.78125	2.13627	0.365913	0.546749	0.456505	0.188197	0.816633	0.11188	0.752966	0.670951	0.711158
	PAN	7	Age6-10	Current diet	326.848	51.1107	49.3021	139.312	18.1907	10.6364	185.759	13.7484	116.467	43.4982	87.163	42.1952			PAN	7	α=0.0; JFS	0.946395	0.844475	1.18499	0.775948	0.57396	0.962965					PAN	7	Age6-10	α=1.0; HOS	0.382605	0.837889	3.4283	0.799647	2.83047	0.900004	0.918184	1.02928	0.899999	0.75725	0.883899	0.771521	1.20325
	PER	7	Age6-10	Current diet	298.747	264.789	102.78	177.845	23.4227	17.5804	204.866	25.3107	20.588	16.9421	62.99	22.925			PER	7	α=0.0; JFS	0.42923	0.558476	0.793205	0.704381	0.274303	0.454093					PER	7	Age6-10	α=1.0; HOS	0.345772	0.839225	0.360007	0.0983927	1.69083	0.900002	0.960752	0.263695	0.790961	1.20518	0.839071	0.324707	0.718216
	PHL	6	Age6-10	Current diet	378.068	64.7969	107.896	211.6	7.7182	9.9202	2.4607	32.0842	48.2025	17.8012	87.1852	24.2124			PHL	6	α=0.0; JFS	11.868	14.1621	18.7344	2.13099	13.4683	8.83989					PHL	6	Age6-10	α=1.0; HOS	0.618481	0.218507	0.592722	0.145274	9.72635	0.0055644	120.394	0.101399	0.225312	0.00030335	0.529631	0.0699022	11.0523
	POL	1	Age6-10	Current diet	200.971	159.662	100.112	77.6784	6.6433	18.2746	774.685	6.7722	79.2343	25.2348	166.39	79.6988			POL	1	α=0.0; JFS	0.825396	0.907588	0.985453	0.98835	0.44598	0.521288					POL	1	Age6-10	α=1.0; HOS	0.141124	0.870653	0.767176	1.43257	2.97596	0.809665	0.430108	1.00756	0.85552	0.622997	0.883657	0.823511	0.968375
	PRT	1	Age6-10	Current diet	167.771	77.354	146.906	130.181	8.9459	14.48	659.202	26.3702	61.5098	26.7174	79.8081	97.8237			PRT	1	α=0.0; JFS	0.729923	1.0922	0.861552	0.839538	0.462379	0.919629					PRT	1	Age6-10	α=1.0; HOS	0.0252613	0.130772	0.401646	1.09709	1.63968	0.0614779	0.400175	0.168213	0.519883	0.898044	0.520273	0.825412	0.557327
	PRY	7	Age6-10	Current diet	218.123	303.552	67.8827	118.584	25.8389	43.3977	260.595	3.3398	77.2516	9.0602	69.3459	49.5216			PRY	7	α=0.0; JFS	0.94271	0.464644	0.499799	0.481677	0.426707	0.508178					PRY	7	Age6-10	α=1.0; HOS	0.0855927	0.847465	0.910664	0.395162	0.890913	0.893379	0.923103	3.70591	0.759736	1.10373e-05	0.846882	0.792208	0.920919
	PSE	5	Age6-10	Current diet	223.017	103.46	1026.22	405.077	26.6887	91.7733	928.681	10.0987	92.5336	20.0629	154.498	36.7882			PSE	5	α=0.0; JFS	0.717404	0.635423	0.636534	0.662763	0.726465	0.703935					PSE	5	Age6-10	α=1.0; HOS	0.479626	0.215432	0.108424	0.138521	0.942249	0.9	0.430892	4.13723	0.9	0.9	0.883863	0.853796	0.907502
	ROU	1	Age6-10	Current diet	249.256	137.262	127.511	98.4187	6.7217	24.3728	813.015	3.5375	51.5196	18.4375	89.6575	45.6436			ROU	1	α=0.0; JFS	0.706667	0.614147	1.02147	0.853078	0.354337	0.460376					ROU	1	Age6-10	α=1.0; HOS	0.066915	0.899998	0.579493	0.517957	5.63298	0.875316	0.461475	2.1137	0.777296	0.674951	0.816712	0.70976	1.17721
	RUS	1	Age6-10	Current diet	207.489	154.581	78.0554	84.4087	6.6975	28.2046	555.34	12.1722	58.8397	27.236	189.734	54.1434			RUS	1	α=0.0; JFS	0.767779	0.590122	0.69636	0.62124	0.45984	0.680937					RUS	1	Age6-10	α=1.0; HOS	0.158066	0.9	1.41797	1.44388	4.15468	0.899999	0.248764	2.12097	0.884709	0.71056	0.895537	0.671857	1.20892
	RWA	4	Age6-10	Current diet	147.981	601.181	97.6155	256.441	87.1469	0.7495	58.27	2.0784	10.3313	0.2946	11.659	10.5973			RWA	4	α=0.0; JFS	0.92598	4.10252	1.38277	2.48104	0.550044	1.11298					RWA	4	Age6-10	α=1.0; HOS	0.153831	0.705134	1.77256	0.0877136	0.399016	4.46604	4.77276	0	1.31416	0.813306	0.00029162	0.065913	1.21256
	SAU	5	Age6-10	Current diet	254.432	25.6926	112.086	145.897	15.246	9.8032	225.083	6.4579	21.1654	69.1889	108.993	55.5731			SAU	5	α=0.0; JFS	1.24725	0.761304	0.918677	0.790723	0.937799	0.804196					SAU	5	Age6-10	α=1.0; HOS	0.316168	0.617485	1.26736	0.689116	3.94279	0.900002	0.806412	2.94456	0.899997	0.646677	0.9	0.717169	1.22065
	SDN	4	Age6-10	Current diet	394.102	26.2737	116.973	98.2036	33.671	1.5256	583.192	2.0984	36.01	1.3471	44.925	19.6754			SDN	4	α=0.0; JFS	1.51964	0.661636	3.7186	1.3475	1.46731	0.811519					SDN	4	Age6-10	α=1.0; HOS	0.376034	0.869002	0.541776	0.875738	0.366464	0.899974	0.363977	8.17961	0.9	23.4744	0.900002	0.558194	3.19209
	SEN	4	Age6-10	Current diet	537.787	41.4553	101.412	32.0702	26.9572	3.8984	45.2887	34.555	17.4555	5.7091	28.9579	50.4915			SEN	4	α=0.0; JFS	1.40623	1.39344	1.82014	1.28321	1.07708	0.82025					SEN	4	Age6-10	α=1.0; HOS	0.521859	0.581701	0.201055	3.86724	0.368974	0.323671	6.37806	0.165536	0.543021	0.903365	0.845168	0.722807	1.2852
	SLV	7	Age6-10	Current diet	309.734	53.0102	90.6614	123.922	40.2986	17.7843	228.028	5.9367	15.2109	26.2557	108.865	23.8914			SLV	7	α=0.0; JFS	1.33096	0.36575	0.988033	0.60536	0.288992	0.921268					SLV	7	Age6-10	α=1.0; HOS	0.279608	0.526487	0.381402	0.309037	0.10451	0.899704	1.02986	3.36887e-05	0.575489	0.437535	0.70456	0.840311	0.507378
	SRB	1	Age6-10	Current diet	190.736	54.5247	100.552	142.998	22.5564	12.9139	495.544	2.9894	44.7858	12.8497	110.69	23.778			SRB	1	α=0.0; JFS	0.788626	0.236991	0.323935	0.413887	0.174125	0.365448					SRB	1	Age6-10	α=1.0; HOS	0.27211	0.899999	0.710552	0.210994	1.35071	0.897723	0.11526	0.657021	0.89208	0.12468	0.869843	0.667647	0.639051
	SUR	7	Age6-10	Current diet	329.652	57.5298	76.763	146.821	6.7947	3.5219	41.988	14.8676	28.1432	53.5639	135.345	41.9724			SUR	7	α=0.0; JFS	2.43587	1.94476	2.21526	2.30246	2.15309	2.40525					SUR	7	Age6-10	α=1.0; HOS	0.355146	0.888197	0.543832	0.475537	2.34628	0.895568	9.67295	0.728712	0.288521	0.899961	0.838053	0.527976	1.5384
	SVK	1	Age6-10	Current diet	177.885	74.0045	65.4622	72.106	6.5636	22.7142	404.549	4.4589	50.1894	20.0103	174.89	72.699			SVK	1	α=0.0; JFS	1.28995	0.864669	1.2483	1.30564	0.960435	1.07512					SVK	1	Age6-10	α=1.0; HOS	0.178183	0.899999	2.88358	1.94993	10.1085	0.900001	0.127324	9.17433	0.899999	0.960385	0.9	0.875727	2.48816
	SVN	1	Age6-10	Current diet	198.488	76.8322	57.482	163.744	10.4099	17.7464	668.654	6.2563	72.9315	27.5224	99.5894	71.8115			SVN	1	α=0.0; JFS	1.11303	0.839603	0.914355	0.916937	1.21222	0.807334					SVN	1	Age6-10	α=1.0; HOS	0.144543	0.732293	1.0743	0.470251	4.18967	0.800089	0.428926	0.259067	0.86417	0.886383	0.765808	0.7921	0.950633
	SWE	1	Age6-10	Current diet	130.962	77.7955	87.7465	129.009	8.7078	18.4105	1118.79	13.3336	60.9473	14.5599	112.851	119.486			SWE	1	α=0.0; JFS	0.805767	0.966537	0.910707	0.821329	0.402189	0.870657					SWE	1	Age6-10	α=1.0; HOS	0.351707	0.481482	1.27094	0.686319	4.20373	0.862638	0.556703	0.00552739	0.839087	0.899663	0.824044	0.772039	0.97949
	SWZ	4	Age6-10	Current diet	395.17	126.669	30.3873	114.721	12.3586	3.8276	96.4823	1.8255	25.2536	6.8523	56.7187	18.1592			SWZ	4	α=0.0; JFS	2.13084	1.31009	1.60071	1.84292	0.646642	1.25875					SWZ	4	Age6-10	α=1.0; HOS	0.470493	0.494996	1.89144	0.546267	4.1408	0.0558313	3.16155	0.38384	0.633189	0.0675977	0.547065	0.170646	1.04698
	THA	6	Age6-10	Current diet	319.167	46.8071	75.0598	232.563	14.5749	27.5476	72.3842	24.7586	29.7742	19.9304	192.072	24.6321			THA	6	α=0.0; JFS	1.19607	1.03961	1.61046	1.64942	1.33192	1.12385					THA	6	Age6-10	α=1.0; HOS	0.477692	0.557024	1.72148	0.0567786	3.6758	0.900002	4.2356	0.132806	0.899997	0.12652	0.899999	0.071557	1.14627
	TJK	5	Age6-10	Current diet	259.816	58.5492	146.547	47.4459	7.8468	3.5038	207.217	0.23	17.1296	4.0818	56.489	28.3363			TJK	5	α=0.0; JFS	1.85631	1.04147	0.888756	0.777905	1.60338	0.919858					TJK	5	Age6-10	α=1.0; HOS	0.106691	0.9	0.20849	1.64189	3.24753	0.899994	0.485838	92.2261	0.495546	0.883875	0.853028	0.388149	8.52809
	TTO	7	Age6-10	Current diet	277.49	94.4592	56.4931	181.377	27.709	6.4057	17.0226	18.0215	27.6356	78.776	156.41	41.7674			TTO	7	α=0.0; JFS	2.97352	2.7531	3.72701	3.75451	3.07644	2.84182					TTO	7	Age6-10	α=1.0; HOS	0.544186	0.870601	2.67303	0.411322	2.1635	0.900011	19.4457	1.0353	0.848757	0.586959	0.899999	0.428827	2.56735
	TUN	5	Age6-10	Current diet	382.28	67.6843	230.843	138.644	30.6077	14.9455	361.314	11.8389	21.7421	19.5042	125.808	52.9319			TUN	5	α=0.0; JFS	0.922037	0.666614	0.693357	0.651114	0.773772	0.750369					TUN	5	Age6-10	α=1.0; HOS	0.471283	0.9	0.330546	0.675512	1.75924	0.899997	0.176043	3.40471	0.9	0.869849	0.9	0.899998	1.0156
	TUR	5	Age6-10	Current diet	277.402	115.568	284.404	186.046	40.0233	13.7769	618.141	6.6895	22.8423	27.1311	107.204	74.4336			TUR	5	α=0.0; JFS	0.380382	0.476656	0.511802	0.513896	0.198559	0.401302					TUR	5	Age6-10	α=1.0; HOS	0.175869	0.646381	0.112373	0.0477673	0.156212	0.553484	0.281359	0.858031	0.584048	0.898227	0.867789	0.74003	0.493464
	TZA	4	Age6-10	Current diet	317.992	323.377	87.4529	120.71	70.8669	1.2781	122.058	6.7962	12.438	2.8329	21.3067	21.3229			TZA	4	α=0.0; JFS	0.537311	0.246038	0.889138	1.1099	0.192009	0.266296					TZA	4	Age6-10	α=1.0; HOS	0.348933	0.9	1.3822	0.720922	0.0386203	0.89993	1.96568	1.4761	0.900008	5.06234	0.874124	0.569097	1.2615
	UKR	1	Age6-10	Current diet	194.441	194.332	114.527	70.1683	5.9151	34.0388	541.227	8.2585	35.4903	25.4368	179.267	44.5613			UKR	1	α=0.0; JFS	0.700979	0.827284	0.742176	0.664844	0.634001	0.514756					UKR	1	Age6-10	α=1.0; HOS	0.0889329	0.9	1.67814	2.48017	5.65886	0.899999	0.301387	4.91305	0.899995	0.511625	0.9	0.87554	1.67564
	URY	7	Age6-10	Current diet	373.613	102.769	85.4378	169.774	8.2536	30.4845	1158.13	5.86	69.9356	34.1763	102.989	31.5446			URY	7	α=0.0; JFS	0.65486	0.647002	0.580713	0.747482	0.700419	0.672706					URY	7	Age6-10	α=1.0; HOS	0.523847	0.631418	1.42121	0.488315	5.02553	0.894819	0.478853	0.786587	0.840498	0.900001	0.733966	0.78908	1.12618
	USA	2	Age6-10	Current diet	135.24	67.5353	91.9727	103.276	14.3685	22.2021	900.54	7.5996	59.1715	48.0734	163.759	93.1626			USA	2	α=0.0; JFS	0.553045	0.728783	0.66944	0.651602	0.344469	0.557175					USA	2	Age6-10	α=1.0; HOS	0.735549	0.666962	0.439285	0.0250639	0.0293698	0.0922255	0.443676	2.63172e-05	0.853409	0.899348	0.749815	0.816433	0.479264
	UZB	5	Age6-10	Current diet	311.094	88.993	216.072	86.1165	2.3763	9.3492	461.742	0.3003	42.1583	1.8602	31.1931	32.2662			UZB	5	α=0.0; JFS	2.08926	1.64257	1.43888	1.40632	0.460525	1.18523					UZB	5	Age6-10	α=1.0; HOS	0.0915295	0.899965	0.187824	0.288831	13.9506	0.786709	0.0921534	119.844	0.877554	9.0107	0.892534	0.823627	12.3122
	VCT	7	Age6-10	Current diet	240.327	140.129	107.483	307.922	22.6842	13.5477	54.9203	17.8419	37.7484	107.496	120.848	30.447			VCT	7	α=0.0; JFS	1.31508	1.17616	1.52528	1.77122	0.958539	1.12883					VCT	7	Age6-10	α=1.0; HOS	0.421022	0.293629	0.30394	0.168978	1.1008	0.0253106	6.06723	0.0107051	0.537861	0.287037	0.667611	0.474126	0.863187
	ZAF	4	Age6-10	Current diet	525.389	67.2722	72.9631	68.7933	11.0664	14.246	167.082	7.4455	39.5008	44.0893	56.3567	39.6138			ZAF	4	α=0.0; JFS	1.33334	1.34873	1.05965	0.909684	1.0201	1.27808					ZAF	4	Age6-10	α=1.0; HOS	0.669037	0.370764	3.12066	2.5086	5.78404	0.284676	1.0161	1.20817	0.52947	0.297083	0.85148	0.722276	1.44686
	ZWE	4	Age6-10	Current diet	453.572	47.3214	32.7308	29.8502	18.0867	3.7421	87.9024	3.6064	22.5825	9.0014	44.2628	35.1374			ZWE	4	α=0.0; JFS	2.45156	0.449057	1.52396	1.17049	0.39272	0.613233					ZWE	4	Age6-10	α=1.0; HOS	0.476126	0.846182	2.43151	3.64685	2.38767	0.900003	3.24644	10.2969	0.89429	3.64354	0.873374	0.664702	2.52563
	AGO	4	Age11-19	Current diet	316.415	827.868	58.6528	539.862	45.485	4.657	30.1756	31.9319	38.9713	33.6482	49.5434	26.0138			AGO	4	α=0.9	1.80803	1.31548	1.22985	1.15019	1.09393	1.41594					AGO	4	Age11-19	α=1.0; HOS	0.189923	0.899995	1.26636	0.538305	0.328293	0.182134	16.1109	0.586191	0.734533	0.871321	0.776366	0.0740338	1.87987
	ALB	1	Age11-19	Current diet	291.303	74.8587	319.731	243.156	21.3311	13.2984	1005.86	6.5113	69.689	25.793	225.292	24.7834			ALB	1	α=0.9	1.35211	0.758601	0.798317	0.636287	0.760432	0.643908					ALB	1	Age11-19	α=1.0; HOS	0.200739	0.0434165	0.0660634	0.0963469	2.62835	0.424231	0.510277	1.14062	0.377761	0.573198	0.748779	0.134877	0.578722
	ARE	5	Age11-19	Current diet	354.468	31.4039	151.7	186.66	118.897	11.8548	48.114	29.5255	33.5433	88.2605	145.197	43.704			ARE	5	α=0.9	1.68371	0.746286	1.20981	1.10834	1.15614	0.990161					ARE	5	Age11-19	α=1.0; HOS	0.280643	0.0801334	0.487857	0.07305	0.221911	0.147493	5.38982	0.111063	0.554391	0.884655	0.634944	0.277332	0.761941
	ARG	7	Age11-19	Current diet	348.677	112.475	157.482	160.917	5.0271	33.8771	929.436	8.6175	161.734	80.2607	184.194	47.9964			ARG	7	α=0.9	1.25396	1.0688	1.20214	1.8648	1.49382	0.612974					ARG	7	Age11-19	α=1.0; HOS	0.0921521	0.734997	0.341355	0.454408	10.8315	0.9	0.357807	0.762228	0.87578	0.630907	0.89893	0.455442	1.44462
	ARM	1	Age11-19	Current diet	279.798	80.0522	340.709	139.543	3.0634	26.6732	620.172	3.3436	61.2093	29.1926	196.426	33.3866			ARM	1	α=0.9	2.30409	1.26549	1.01424	1.00118	1.46196	1.50506					ARM	1	Age11-19	α=1.0; HOS	0.394687	0.899813	0.193155	0.622587	3.93236	0.503562	0.522021	15.7295	0.899996	0.19248	0.899975	0.730844	2.12674
	ATG	7	Age11-19	Current diet	226.006	49.2736	153.782	374.318	9.7208	0	203.268	78.0845	64.8569	134.33	119.653	40.9082			ATG	7	α=0.9	1.2253	0.918275	1.13785	1.23776	1.34065	1.11938					ATG	7	Age11-19	α=1.0; HOS	0.0911642	0.77671	1.08232	0.00616133	4.31256	#DIV/0!	1.10518	0.362391	0.758072	0.674284	0.526981	0.0742565	0.888189
	AUS	2	Age11-19	Current diet	153.247	76.3193	110.576	105.838	22.1248	14.3016	962.966	14.5226	128.981	65.8916	200.338	82.0963			AUS	2	α=0.9	0.906511	0.811725	0.838322	0.620975	0.721005	1.00045					AUS	2	Age11-19	α=1.0; HOS	0.989699	0.871494	0.367072	0.241558	2.01313	0.0745301	0.455511	0	0.804727	0.547977	0.717799	0.655734	0.644936
	AUT	1	Age11-19	Current diet	195.045	100.109	129.396	207.751	13.0452	26.1676	844.126	9.8342	123.595	27.3825	211.935	135.169			AUT	1	α=0.9	1.05112	0.957478	0.533283	0.619092	0.391069	0.673781					AUT	1	Age11-19	α=1.0; HOS	0.205031	0.878228	1.18743	0.246187	8.49998	0.864917	0.597184	3.29443	0.875282	0.489846	0.899979	0.702607	1.56176
	AZE	1	Age11-19	Current diet	462.143	133.016	198.967	121.795	3.7317	17.0899	473.469	2.6601	49.4207	18.8119	79.8435	16.2877			AZE	1	α=0.9	1.87464	1.27166	0.872509	0.554297	0.720781	0.468322					AZE	1	Age11-19	α=1.0; HOS	0.146545	0.9	1.3367	1.38659	3.16435	0.899999	0.130983	16.634	0.899997	1.37485	0.899953	0.778759	2.37939
	BEL	1	Age11-19	Current diet	232.591	183.149	228.375	72.0717	10.7943	28.1271	847.993	18.7487	84.7074	33.1523	229.876	141.595			BEL	1	α=0.9	1.19304	1.0789	0.943832	0.873038	0.829903	0.983598					BEL	1	Age11-19	α=1.0; HOS	0.357182	0.899999	0.392726	1.62097	7.01079	0.9	0.522147	2.26784	0.899998	0.0256905	0.899995	0.876786	1.38951
	BEN	4	Age11-19	Current diet	460.069	1029.15	95.2026	87.6733	81.5863	2.0699	13.4221	24.4059	15.4082	26.9075	17.7662	22.1729			BEN	4	α=0.9	2.82498	2.6761	1.44814	1.99128	1.62705	2.25938					BEN	4	Age11-19	α=1.0; HOS	0.378526	0.89446	1.51751	1.34604	0.0642485	0.347698	18.4723	0.891727	0.474053	0.817293	0.701062	0.359137	2.18867
	BFA	4	Age11-19	Current diet	804.791	41.2747	48.5512	15.7636	91.4193	7.0622	59.6981	13.7532	35.9079	5.2488	24.0918	18.4151			BFA	4	α=0.9	3.23301	2.14483	1.93411	1.97874	2.23947	1.46802					BFA	4	Age11-19	α=1.0; HOS	0.617997	0.494371	1.59868	18.9479	0.267193	0.561893	6.5585	1.26788	0.819619	3.50743	0.582352	0.0913272	2.94293
	BGD	6	Age11-19	Current diet	570.282	108.832	60.4965	52.0392	16.6902	3.6785	59.8542	28.2178	7.4349	3.088	29.4425	16.3488			BGD	6	α=0.9	3.73931	1.68793	2.24791	1.39191	2.24242	3.35741					BGD	6	Age11-19	α=1.0; HOS	0.43882	0.896948	2.80339	4.74641	3.39698	0.716379	5.62259	0.372953	0.900012	10.643	0.856908	0.776522	2.68091
	BGR	1	Age11-19	Current diet	316.367	57.0254	78.2502	76.5528	11.783	19.2989	505.946	6.4775	83.6056	43.6282	171.443	47.521			BGR	1	α=0.9	1.84938	1.27612	1.06578	0.908243	1.4535	1.27552					BGR	1	Age11-19	α=1.0; HOS	0.2588	0.767426	2.00965	1.93692	8.89648	0.899994	0.226147	2.96919	0.899998	0.622467	0.899996	0.484901	1.73933
	BHS	7	Age11-19	Current diet	198.64	80.4237	219.217	523.369	3.8063	20.7736	35.0924	36.8479	103.632	125.873	165.391	45.2962			BHS	7	α=0.9	3.05536	3.06642	3.58126	3.47882	3.57216	2.80095					BHS	7	Age11-19	α=1.0; HOS	0.396544	0.704093	1.00516	0.387781	17.9389	0.886587	6.93518	0.0376358	0.899999	0.0775083	0.899237	0.649346	2.56817
	BIH	1	Age11-19	Current diet	342.126	132.87	202.776	152.281	23.0257	8.224	537.651	5.8668	42.8862	27.3692	113.387	28.5387			BIH	1	α=0.9	0.638005	0.555266	0.496585	0.36394	0.640049	1.33224					BIH	1	Age11-19	α=1.0; HOS	0.0973776	0.899009	0.548575	0.758389	3.12646	0.899441	0.263921	6.6526	0.831461	0.899438	0.867551	0.287571	1.34432
	BLR	1	Age11-19	Current diet	228.913	333.894	161.138	105.939	6.8996	38.5122	935.417	17.243	123.153	49.0409	209.855	73.1509			BLR	1	α=0.9	1.04183	0.661439	0.731729	0.817452	0.842617	0.772483					BLR	1	Age11-19	α=1.0; HOS	0.643271	0.9	0.920394	1.17192	1.87638	0.494207	0.46705	1.89249	0.9	0.890041	0.893637	0.707881	0.979773
	BLZ	7	Age11-19	Current diet	364.667	34.7883	96.4739	398.566	61.7654	19.1956	45.5417	22.9027	47.717	60.0902	162.683	37.1902			BLZ	7	α=0.9	1.34358	1.04004	1.40878	1.32625	1.43284	1.15794					BLZ	7	Age11-19	α=1.0; HOS	0.160303	0.704886	2.13266	0.455369	0.26508	0.899998	8.66227	0.755592	0.891487	0.606209	0.895847	0.0227399	1.37104
	BOL	7	Age11-19	Current diet	367.815	222.3	75.466	144.624	30.7709	14.4381	160.217	2.6155	79.8841	84.4155	98.9998	20.0801			BOL	7	α=0.9	1.42229	0.820644	0.899478	0.879511	1.85151	0.855955					BOL	7	Age11-19	α=1.0; HOS	0.219429	0.82294	2.12562	0.480804	0.988002	0.381629	1.90294	2.96043	0.768645	0.0607223	0.683328	0.223146	0.968136
	BRA	7	Age11-19	Current diet	349.048	187.967	115.537	292.464	77.9181	23.499	531.742	13.1037	122.657	92.2837	166.323	56.078			BRA	7	α=0.9	0.35854	0.534397	0.44115	0.427018	0.47255	0.426799					BRA	7	Age11-19	α=1.0; HOS	0.314704	0.860175	1.29874	0.0627896	0.109478	0.850909	0.320202	2.08572	0.876154	0.532868	0.842149	0.221625	0.697959
	BRB	7	Age11-19	Current diet	291.317	121.173	157.097	250.672	44.0127	19.0879	64.4945	57.905	61.0297	113.45	213.305	68.9155			BRB	7	α=0.9	1.2496	0.880537	1.11589	1.29245	1.27317	0.955507					BRB	7	Age11-19	α=1.0; HOS	0.142273	0.846902	0.77021	0.130091	1.7232	0.888767	4.92468	0.227293	0.877207	0.565517	0.895852	0.397552	1.03246
	BRN	6	Age11-19	Current diet	367.108	59.9114	118.688	149.05	20.2917	39.7525	24.8979	30.7298	41.0926	134.704	246.965	45.358			BRN	6	α=0.9	1.8113	1.76029	1.91345	2.82162	3.05736	1.64422					BRN	6	Age11-19	α=1.0; HOS	0.308808	0.893511	1.2094	1.17376	2.71349	0.881411	12.5657	0.0392453	0.784134	0.108756	0.898028	0.528462	1.84206
	BWA	4	Age11-19	Current diet	411.008	161.562	104.257	93.8359	27.1119	5.1057	178.29	6.2428	77.1523	10.5313	94.4369	35.4253			BWA	4	α=0.9	1.40323	0.718287	0.984027	1.08013	0.977227	0.939758					BWA	4	Age11-19	α=1.0; HOS	0.35559	0.842038	0.161617	0.28892	2.80418	0.124214	1.40882	4.83863	0.84292	0.926999	0.825201	0.164306	1.13195
	CAF	4	Age11-19	Current diet	224.994	917.944	52.5622	101.551	39.6427	2.0048	53.2781	16.3914	95.44	3.0121	29.9948	47.0939			CAF	4	α=0.9	1.6658	1.61942	2.16723	3.5628	3.20949	1.82502					CAF	4	Age11-19	α=1.0; HOS	0.310518	0.899954	1.99502	1.85298	0.269666	1.58305	14.626	2.10723	0.882123	0.899837	0.899413	0.716426	2.25352
	CAN	2	Age11-19	Current diet	179.19	117.481	115.648	131.271	37.5211	23.8998	628.282	11.8978	76.111	53.2404	211.496	120.412			CAN	2	α=0.9	0.873876	0.680311	0.486083	0.433669	0.642154	0.794753					CAN	2	Age11-19	α=1.0; HOS	0.826701	0.7019	1.04066	0.480385	0.171458	0.515996	0.301576	0.212754	0.817217	0.072537	0.832647	0.848765	0.56855
	CHE	1	Age11-19	Current diet	187.889	72.1462	125.37	151.801	13.6097	19.6935	1027.43	12.265	90.4342	23.1961	255.627	96.1643			CHE	1	α=0.9	0.910043	1.07583	0.951615	0.541088	0.527713	0.84666					CHE	1	Age11-19	α=1.0; HOS	0.136056	0.89648	1.33684	0.955315	6.00417	0.541173	0.610223	1.68192	0.796716	2.64801	0.7786	0.797791	1.43194
	CHL	7	Age11-19	Current diet	406.391	161.384	143.485	138.18	20.6797	25.9841	387.901	20.9946	103.107	82.185	187.547	34.7516			CHL	7	α=0.9	0.663067	0.461685	0.540046	0.651837	0.495463	0.361567					CHL	7	Age11-19	α=1.0; HOS	0.359765	0.27371	0.84399	0.0921518	0.986789	0.0570349	0.0226893	0.0469121	0.769874	0.00958326	0.704797	0.0292418	0.349711
	CHN	3	Age11-19	Current diet	351.32	148.219	633.369	176.757	25.9752	47.9968	114.624	40.1005	109.387	28.2957	41.0866	27.7744			CHN	3	α=0.9	0.595962	0.794694	0.70347	0.552974	0.80131	0.611155					CHN	3	Age11-19	α=1.0; HOS	0.258563	0.887727	0.326973	0.314931	2.08124	0.9	2.10466	0.600105	0.89719	0.393092	0.836058	0.682578	0.856926
	CIV	4	Age11-19	Current diet	439.5	1052.9	79.3281	165.15	25.038	3.7769	5.6388	38.3484	45.9905	3.8699	35.0876	34.7377			CIV	4	α=0.9	6.4297	4.03209	6.54935	5.04295	3.64946	6.6374					CIV	4	Age11-19	α=1.0; HOS	0.34641	0.859909	2.36929	0.976803	1.19248	0.035267	41.3093	0.0471884	0.536517	0.195173	0.84747	0.378033	4.09115
	CMR	4	Age11-19	Current diet	432.884	498.806	306.439	226.723	100.333	0.9887	35.971	36.6418	34.3729	7.1625	43.587	27.6639			CMR	4	α=0.9	1.30137	0.990518	1.07543	1.29906	0.827198	1.19275					CMR	4	Age11-19	α=1.0; HOS	0.315505	0.899989	0.019957	0.0153654	0.0397457	0.0967938	7.70388	0.664599	0.874104	3.95164	0.899993	0.453671	1.32794
	COG	4	Age11-19	Current diet	253.119	904.872	32.0076	136.007	21.2829	1.8137	2.3331	48.3167	53.0802	47.5577	45.2562	25.0595			COG	4	α=0.9	16.6132	10.3905	15.4636	10.5285	7.17092	13.1052					COG	4	Age11-19	α=1.0; HOS	0.0482157	0.89998	10.2667	1.04167	2.36287	0.246182	136.653	0.602932	0.857158	0.208782	0.883267	0.391971	12.8719
	COL	7	Age11-19	Current diet	279.623	199.443	88.8201	228.622	26.2758	28.8971	386.175	9.2265	61.1235	54.2314	205.575	42.776			COL	7	α=0.9	0.722101	0.28017	0.520108	0.762543	0.505024	0.38705					COL	7	Age11-19	α=1.0; HOS	0.106912	0.846686	1.26879	0.0588593	2.03314	0.9	0.102178	1.66266	0.789729	0.204417	0.888406	0.525853	0.782302
[truncated: 9,908 more rows]

## Sheet: Table S7
	Table S7 Supply gaps of 12 major food categories in different regions and age groups, as well as the average supply gap
[truncated: 57 more rows]

## Sheet: Table S8
		Table S8 GDD-GENuS-ICP mapping
[truncated: 226 more rows]

[truncated: 2 more sheets: Table S9-S10, Table S11]
